# Supplementary material for: Predicted Trans-Acting siRNAs in the Human Brain
Source: MDPI journal article supplement (doi:10.3390/ijms16023377), 2015-02-03
Supplement: s1 [file s1]

## Sheet: supplementary file 1
RESULTS IN HUMAN BRAIN
	sRNA_sequence	sRNA_reads	miRNA_loc		miRNA	sRNA_location		sRNA_target&degradome_reads
1	GTGACAGAATGAGACCCTGT	4	ENST00000491239	2015	hsa-miR-5585-3p	ENST00000491239	2092	ENST00000414393&4174&11	ENST00000556729&3973&11	ENST00000556701&1814&11	ENST00000261326&4863&15
2	CAGGATGGTCTCGATCTC	3	ENST00000455424	653	hsa-miR-1273g-3p	ENST00000455424	809	ENST00000428200&271&10
3	CATATTGGCCAGGCTGGTC	2	ENST00000520176	190	hsa-miR-1273g-3p	ENST00000520176	337	ENST00000438190&713&18	ENST00000412349&1235&13	ENST00000433739&713&18	ENST00000414692&713&18	ENST00000448434&713&18	ENST00000426098&713&18	ENST00000423340&713&18	ENST00000458724&713&18	ENST00000442726&425&11	ENST00000520029&195&11	ENST00000455730&350&11	ENST00000340196&1322&11	ENST00000438709&5643&18	ENST00000258459&5664&18	ENST00000366091&617&11	ENST00000573787&5614&11	ENST00000470664&509&13	ENST00000574596&1402&13	ENST00000358004&1929&13	ENST00000334744&1965&13	ENST00000481620&1349&11	ENST00000309594&1939&13	ENST00000492956&1826&11	ENST00000493354&4219&11	ENST00000479695&4219&11	ENST00000375990&6940&13	ENST00000259253&6656&13	ENST00000493868&1024&18	ENST00000399264&1321&11	ENST00000270458&6958&13	ENST00000523599&868&13	ENST00000472801&4219&11	ENST00000559095&369&11	ENST00000585905&1790&14	ENST00000491963&1848&18	ENST00000482297&4219&11	ENST00000395216&3242&13	ENST00000371158&7358&18	ENST00000495807&4219&11	ENST00000377086&6829&13	ENST00000263934&6642&13	ENST00000299505&5614&11
4	TTGGGAGGCCGAGGCAGGCGG	2	ENST00000441363	1955	hsa-miR-5095	ENST00000441363	1974	ENST00000324348&2012&11	ENST00000551366&576&11	ENST00000510345&1754&11	ENST00000582078&371&11	ENST00000595609&2632&11	ENST00000483921&482&11	ENST00000263080&2783&11	ENST00000521261&65&11	ENST00000506579&847&11	ENST00000518345&190&11	ENST00000450981&199&11	ENST00000358748&2632&11	ENST00000553458&2903&11	ENST00000559993&304&11	ENST00000369291&2010&11	ENST00000221996&2120&11	ENST00000221996&1810&11	ENST00000579905&1282&11	ENST00000590534&501&11	ENST00000414706&4651&11	ENST00000576720&1914&11	ENST00000540121&114&11	ENST00000549649&470&11	ENST00000396825&1862&11	ENST00000488013&210&11	ENST00000391994&3637&11	ENST00000373327&3740&11	ENST00000391993&3542&11	ENST00000466468&1504&11	ENST00000570752&1299&11	ENST00000570752&311&11	ENST00000425646&2887&11	ENST00000355497&2920&11
4	TTGGGAGGCCGAGGCAGGCGG	2	ENST00000586372	2923	hsa-miR-5585-3p	ENST00000586372	2790	ENST00000324348&2012&11	ENST00000551366&576&11	ENST00000510345&1754&11	ENST00000582078&371&11	ENST00000595609&2632&11	ENST00000483921&482&11	ENST00000263080&2783&11	ENST00000521261&65&11	ENST00000506579&847&11	ENST00000518345&190&11	ENST00000450981&199&11	ENST00000358748&2632&11	ENST00000553458&2903&11	ENST00000559993&304&11	ENST00000369291&2010&11	ENST00000221996&2120&11	ENST00000221996&1810&11	ENST00000579905&1282&11	ENST00000590534&501&11	ENST00000414706&4651&11	ENST00000576720&1914&11	ENST00000540121&114&11	ENST00000549649&470&11	ENST00000396825&1862&11	ENST00000488013&210&11	ENST00000391994&3637&11	ENST00000373327&3740&11	ENST00000391993&3542&11	ENST00000466468&1504&11	ENST00000570752&1299&11	ENST00000570752&311&11	ENST00000425646&2887&11	ENST00000355497&2920&11
5	AGGCAGGAGAATCGCTTGAAC	2	ENST00000530595	2198	hsa-miR-5095	ENST00000530595	2361	ENST00000544423&495&11	ENST00000442850&52&11	ENST00000586266&326&11	ENST00000523895&195&11	ENST00000521819&273&11	ENST00000520651&390&11
5	AGGCAGGAGAATCGCTTGAAC	2	ENST00000562760	1006	hsa-miR-5096	ENST00000562760	1091	ENST00000544423&495&11	ENST00000442850&52&11	ENST00000586266&326&11	ENST00000523895&195&11	ENST00000521819&273&11	ENST00000520651&390&11
5	AGGCAGGAGAATCGCTTGAAC	2	ENST00000491289	4196	hsa-miR-5096	ENST00000491289	4281	ENST00000544423&495&11	ENST00000442850&52&11	ENST00000586266&326&11	ENST00000523895&195&11	ENST00000521819&273&11	ENST00000520651&390&11
5	AGGCAGGAGAATCGCTTGAAC	2	ENST00000394434	4538	hsa-miR-5096	ENST00000394434	4623	ENST00000544423&495&11	ENST00000442850&52&11	ENST00000586266&326&11	ENST00000523895&195&11	ENST00000521819&273&11	ENST00000520651&390&11
5	AGGCAGGAGAATCGCTTGAAC	2	ENST00000510711	1229	hsa-miR-5096	ENST00000510711	1324	ENST00000544423&495&11	ENST00000442850&52&11	ENST00000586266&326&11	ENST00000523895&195&11	ENST00000521819&273&11	ENST00000520651&390&11
5	AGGCAGGAGAATCGCTTGAAC	2	ENST00000409982	830	hsa-miR-5096	ENST00000409982	915	ENST00000544423&495&11	ENST00000442850&52&11	ENST00000586266&326&11	ENST00000523895&195&11	ENST00000521819&273&11	ENST00000520651&390&11
5	AGGCAGGAGAATCGCTTGAAC	2	ENST00000597060	1764	hsa-miR-5096	ENST00000597060	1845	ENST00000544423&495&11	ENST00000442850&52&11	ENST00000586266&326&11	ENST00000523895&195&11	ENST00000521819&273&11	ENST00000520651&390&11
5	AGGCAGGAGAATCGCTTGAAC	2	ENST00000370791	5077	hsa-miR-5096	ENST00000370791	5162	ENST00000544423&495&11	ENST00000442850&52&11	ENST00000586266&326&11	ENST00000523895&195&11	ENST00000521819&273&11	ENST00000520651&390&11
5	AGGCAGGAGAATCGCTTGAAC	2	ENST00000370799	1539	hsa-miR-5096	ENST00000370799	1623	ENST00000544423&495&11	ENST00000442850&52&11	ENST00000586266&326&11	ENST00000523895&195&11	ENST00000521819&273&11	ENST00000520651&390&11
5	AGGCAGGAGAATCGCTTGAAC	2	ENST00000590227	422	hsa-miR-5096	ENST00000590227	494	ENST00000544423&495&11	ENST00000442850&52&11	ENST00000586266&326&11	ENST00000523895&195&11	ENST00000521819&273&11	ENST00000520651&390&11
5	AGGCAGGAGAATCGCTTGAAC	2	ENST00000600410	2247	hsa-miR-5096	ENST00000600410	2331	ENST00000544423&495&11	ENST00000442850&52&11	ENST00000586266&326&11	ENST00000523895&195&11	ENST00000521819&273&11	ENST00000520651&390&11
5	AGGCAGGAGAATCGCTTGAAC	2	ENST00000563945	298	hsa-miR-5096	ENST00000563945	382	ENST00000544423&495&11	ENST00000442850&52&11	ENST00000586266&326&11	ENST00000523895&195&11	ENST00000521819&273&11	ENST00000520651&390&11
5	AGGCAGGAGAATCGCTTGAAC	2	ENST00000318348	1249	hsa-miR-5096	ENST00000318348	1335	ENST00000544423&495&11	ENST00000442850&52&11	ENST00000586266&326&11	ENST00000523895&195&11	ENST00000521819&273&11	ENST00000520651&390&11
5	AGGCAGGAGAATCGCTTGAAC	2	ENST00000576086	799	hsa-miR-5585-3p	ENST00000576086	815	ENST00000544423&495&11	ENST00000442850&52&11	ENST00000586266&326&11	ENST00000523895&195&11	ENST00000521819&273&11	ENST00000520651&390&11
5	AGGCAGGAGAATCGCTTGAAC	2	ENST00000423644	4475	hsa-miR-5585-3p	ENST00000423644	4491	ENST00000544423&495&11	ENST00000442850&52&11	ENST00000586266&326&11	ENST00000523895&195&11	ENST00000521819&273&11	ENST00000520651&390&11
5	AGGCAGGAGAATCGCTTGAAC	2	ENST00000359484	4348	hsa-miR-5585-3p	ENST00000359484	4364	ENST00000544423&495&11	ENST00000442850&52&11	ENST00000586266&326&11	ENST00000523895&195&11	ENST00000521819&273&11	ENST00000520651&390&11
5	AGGCAGGAGAATCGCTTGAAC	2	ENST00000346834	4411	hsa-miR-5585-3p	ENST00000346834	4427	ENST00000544423&495&11	ENST00000442850&52&11	ENST00000586266&326&11	ENST00000523895&195&11	ENST00000521819&273&11	ENST00000520651&390&11
5	AGGCAGGAGAATCGCTTGAAC	2	ENST00000480696	437	hsa-miR-5585-3p	ENST00000480696	453	ENST00000544423&495&11	ENST00000442850&52&11	ENST00000586266&326&11	ENST00000523895&195&11	ENST00000521819&273&11	ENST00000520651&390&11
5	AGGCAGGAGAATCGCTTGAAC	2	ENST00000394019	4654	hsa-miR-5585-3p	ENST00000394019	4670	ENST00000544423&495&11	ENST00000442850&52&11	ENST00000586266&326&11	ENST00000523895&195&11	ENST00000521819&273&11	ENST00000520651&390&11
5	AGGCAGGAGAATCGCTTGAAC	2	ENST00000483195	4882	hsa-miR-5585-3p	ENST00000483195	4898	ENST00000544423&495&11	ENST00000442850&52&11	ENST00000586266&326&11	ENST00000523895&195&11	ENST00000521819&273&11	ENST00000520651&390&11
5	AGGCAGGAGAATCGCTTGAAC	2	ENST00000597411	656	hsa-miR-5585-3p	ENST00000597411	672	ENST00000544423&495&11	ENST00000442850&52&11	ENST00000586266&326&11	ENST00000523895&195&11	ENST00000521819&273&11	ENST00000520651&390&11
5	AGGCAGGAGAATCGCTTGAAC	2	ENST00000465069	250	hsa-miR-5585-3p	ENST00000465069	266	ENST00000544423&495&11	ENST00000442850&52&11	ENST00000586266&326&11	ENST00000523895&195&11	ENST00000521819&273&11	ENST00000520651&390&11
5	AGGCAGGAGAATCGCTTGAAC	2	ENST00000340681	393	hsa-miR-5585-3p	ENST00000340681	409	ENST00000544423&495&11	ENST00000442850&52&11	ENST00000586266&326&11	ENST00000523895&195&11	ENST00000521819&273&11	ENST00000520651&390&11
5	AGGCAGGAGAATCGCTTGAAC	2	ENST00000337963	2781	hsa-miR-5585-3p	ENST00000337963	2797	ENST00000544423&495&11	ENST00000442850&52&11	ENST00000586266&326&11	ENST00000523895&195&11	ENST00000521819&273&11	ENST00000520651&390&11
5	AGGCAGGAGAATCGCTTGAAC	2	ENST00000502168	2486	hsa-miR-5585-3p	ENST00000502168	2502	ENST00000544423&495&11	ENST00000442850&52&11	ENST00000586266&326&11	ENST00000523895&195&11	ENST00000521819&273&11	ENST00000520651&390&11
5	AGGCAGGAGAATCGCTTGAAC	2	ENST00000535942	2711	hsa-miR-5585-3p	ENST00000535942	2727	ENST00000544423&495&11	ENST00000442850&52&11	ENST00000586266&326&11	ENST00000523895&195&11	ENST00000521819&273&11	ENST00000520651&390&11
5	AGGCAGGAGAATCGCTTGAAC	2	ENST00000382909	2372	hsa-miR-5585-3p	ENST00000382909	2388	ENST00000544423&495&11	ENST00000442850&52&11	ENST00000586266&326&11	ENST00000523895&195&11	ENST00000521819&273&11	ENST00000520651&390&11
5	AGGCAGGAGAATCGCTTGAAC	2	ENST00000358661	2505	hsa-miR-5585-3p	ENST00000358661	2521	ENST00000544423&495&11	ENST00000442850&52&11	ENST00000586266&326&11	ENST00000523895&195&11	ENST00000521819&273&11	ENST00000520651&390&11
5	AGGCAGGAGAATCGCTTGAAC	2	ENST00000354278	3231	hsa-miR-5585-3p	ENST00000354278	3247	ENST00000544423&495&11	ENST00000442850&52&11	ENST00000586266&326&11	ENST00000523895&195&11	ENST00000521819&273&11	ENST00000520651&390&11
5	AGGCAGGAGAATCGCTTGAAC	2	ENST00000351894	3402	hsa-miR-5585-3p	ENST00000351894	3418	ENST00000544423&495&11	ENST00000442850&52&11	ENST00000586266&326&11	ENST00000523895&195&11	ENST00000521819&273&11	ENST00000520651&390&11
5	AGGCAGGAGAATCGCTTGAAC	2	ENST00000535162	3567	hsa-miR-5585-3p	ENST00000535162	3583	ENST00000544423&495&11	ENST00000442850&52&11	ENST00000586266&326&11	ENST00000523895&195&11	ENST00000521819&273&11	ENST00000520651&390&11
5	AGGCAGGAGAATCGCTTGAAC	2	ENST00000324134	3687	hsa-miR-5585-3p	ENST00000324134	3703	ENST00000544423&495&11	ENST00000442850&52&11	ENST00000586266&326&11	ENST00000523895&195&11	ENST00000521819&273&11	ENST00000520651&390&11
6	CAGAGTCTCGTTCTGTTGCCCA	5	ENST00000593687	318	hsa-miR-1273f	ENST00000593687	257	ENST00000601345&3108&23	ENST00000565421&3772&23	ENST00000573262&57&23	ENST00000493232&32&23	ENST00000532485&4657&23	ENST00000310389&7828&23	ENST00000438796&5763&23	ENST00000571623&4657&23	ENST00000552224&138&23	ENST00000463436&456&23	ENST00000576405&2378&23	ENST00000434037&2378&23	ENST00000560433&184&23	ENST00000319194&3596&23	ENST00000543006&11282&23	ENST00000312675&11339&23	ENST00000392079&1850&23
6	CAGAGTCTCGTTCTGTTGCCCA	5	ENST00000596894	320	hsa-miR-1273f	ENST00000596894	259	ENST00000601345&3108&23	ENST00000565421&3772&23	ENST00000573262&57&23	ENST00000493232&32&23	ENST00000532485&4657&23	ENST00000310389&7828&23	ENST00000438796&5763&23	ENST00000571623&4657&23	ENST00000552224&138&23	ENST00000463436&456&23	ENST00000576405&2378&23	ENST00000434037&2378&23	ENST00000560433&184&23	ENST00000319194&3596&23	ENST00000543006&11282&23	ENST00000312675&11339&23	ENST00000392079&1850&23
7	TTGGGAGGCTGAGGCAGGAGAATC	2	ENST00000369981	7984	hsa-miR-5095	ENST00000369981	8137	ENST00000597357&115&11	ENST00000366278&1635&11	ENST00000596483&227&40
7	TTGGGAGGCTGAGGCAGGAGAATC	2	ENST00000473592	1606	hsa-miR-5096	ENST00000473592	1681	ENST00000597357&115&11	ENST00000366278&1635&11	ENST00000596483&227&40
7	TTGGGAGGCTGAGGCAGGAGAATC	2	ENST00000409982	830	hsa-miR-5096	ENST00000409982	904	ENST00000597357&115&11	ENST00000366278&1635&11	ENST00000596483&227&40
7	TTGGGAGGCTGAGGCAGGAGAATC	2	ENST00000378845	1389	hsa-miR-5096	ENST00000378845	1462	ENST00000597357&115&11	ENST00000366278&1635&11	ENST00000596483&227&40
7	TTGGGAGGCTGAGGCAGGAGAATC	2	ENST00000590227	422	hsa-miR-5096	ENST00000590227	483	ENST00000597357&115&11	ENST00000366278&1635&11	ENST00000596483&227&40
7	TTGGGAGGCTGAGGCAGGAGAATC	2	ENST00000586372	3494	hsa-miR-5585-3p	ENST00000586372	3499	ENST00000597357&115&11	ENST00000366278&1635&11	ENST00000596483&227&40
8	GGGAGGCTGAGGCAGGAG	3	ENST00000366259	697	hsa-miR-5095	ENST00000366259	853	ENST00000570974&371&13	ENST00000534904&3142&13	ENST00000601343&685&20	ENST00000565600&219&13	ENST00000597357&115&11
8	GGGAGGCTGAGGCAGGAG	3	ENST00000562760	1006	hsa-miR-5096	ENST00000562760	1082	ENST00000570974&371&13	ENST00000534904&3142&13	ENST00000601343&685&20	ENST00000565600&219&13	ENST00000597357&115&11
8	GGGAGGCTGAGGCAGGAG	3	ENST00000563747	1334	hsa-miR-5095	ENST00000563747	1489	ENST00000570974&371&13	ENST00000534904&3142&13	ENST00000601343&685&20	ENST00000565600&219&13	ENST00000597357&115&11
8	GGGAGGCTGAGGCAGGAG	3	ENST00000586798	3069	hsa-miR-5095	ENST00000586798	3224	ENST00000570974&371&13	ENST00000534904&3142&13	ENST00000601343&685&20	ENST00000565600&219&13	ENST00000597357&115&11
8	GGGAGGCTGAGGCAGGAG	3	ENST00000506037	277	hsa-miR-5095	ENST00000506037	432	ENST00000570974&371&13	ENST00000534904&3142&13	ENST00000601343&685&20	ENST00000565600&219&13	ENST00000597357&115&11
8	GGGAGGCTGAGGCAGGAG	3	ENST00000436580	2708	hsa-miR-5095	ENST00000436580	2865	ENST00000570974&371&13	ENST00000534904&3142&13	ENST00000601343&685&20	ENST00000565600&219&13	ENST00000597357&115&11
8	GGGAGGCTGAGGCAGGAG	3	ENST00000355407	1634	hsa-miR-5095	ENST00000355407	1789	ENST00000570974&371&13	ENST00000534904&3142&13	ENST00000601343&685&20	ENST00000565600&219&13	ENST00000597357&115&11
8	GGGAGGCTGAGGCAGGAG	3	ENST00000510256	656	hsa-miR-5585-3p	ENST00000510256	663	ENST00000570974&371&13	ENST00000534904&3142&13	ENST00000601343&685&20	ENST00000565600&219&13	ENST00000597357&115&11
8	GGGAGGCTGAGGCAGGAG	3	ENST00000489074	656	hsa-miR-5585-3p	ENST00000489074	663	ENST00000570974&371&13	ENST00000534904&3142&13	ENST00000601343&685&20	ENST00000565600&219&13	ENST00000597357&115&11
8	GGGAGGCTGAGGCAGGAG	3	ENST00000576928	2428	hsa-miR-5095	ENST00000576928	2584	ENST00000570974&371&13	ENST00000534904&3142&13	ENST00000601343&685&20	ENST00000565600&219&13	ENST00000597357&115&11
8	GGGAGGCTGAGGCAGGAG	3	ENST00000574314	2345	hsa-miR-5095	ENST00000574314	2501	ENST00000570974&371&13	ENST00000534904&3142&13	ENST00000601343&685&20	ENST00000565600&219&13	ENST00000597357&115&11
8	GGGAGGCTGAGGCAGGAG	3	ENST00000573669	1460	hsa-miR-5095	ENST00000573669	1616	ENST00000570974&371&13	ENST00000534904&3142&13	ENST00000601343&685&20	ENST00000565600&219&13	ENST00000597357&115&11
8	GGGAGGCTGAGGCAGGAG	3	ENST00000548445	44	hsa-miR-5095	ENST00000548445	199	ENST00000570974&371&13	ENST00000534904&3142&13	ENST00000601343&685&20	ENST00000565600&219&13	ENST00000597357&115&11
8	GGGAGGCTGAGGCAGGAG	3	ENST00000369981	7984	hsa-miR-5095	ENST00000369981	8139	ENST00000570974&371&13	ENST00000534904&3142&13	ENST00000601343&685&20	ENST00000565600&219&13	ENST00000597357&115&11
8	GGGAGGCTGAGGCAGGAG	3	ENST00000574773	2509	hsa-miR-5095	ENST00000574773	2665	ENST00000570974&371&13	ENST00000534904&3142&13	ENST00000601343&685&20	ENST00000565600&219&13	ENST00000597357&115&11
8	GGGAGGCTGAGGCAGGAG	3	ENST00000575379	820	hsa-miR-5095	ENST00000575379	975	ENST00000570974&371&13	ENST00000534904&3142&13	ENST00000601343&685&20	ENST00000565600&219&13	ENST00000597357&115&11
8	GGGAGGCTGAGGCAGGAG	3	ENST00000576360	1576	hsa-miR-5095	ENST00000576360	1731	ENST00000570974&371&13	ENST00000534904&3142&13	ENST00000601343&685&20	ENST00000565600&219&13	ENST00000597357&115&11
8	GGGAGGCTGAGGCAGGAG	3	ENST00000306071	1904	hsa-miR-5095	ENST00000306071	2059	ENST00000570974&371&13	ENST00000534904&3142&13	ENST00000601343&685&20	ENST00000565600&219&13	ENST00000597357&115&11
8	GGGAGGCTGAGGCAGGAG	3	ENST00000470730	1990	hsa-miR-5095	ENST00000470730	2145	ENST00000570974&371&13	ENST00000534904&3142&13	ENST00000601343&685&20	ENST00000565600&219&13	ENST00000597357&115&11
8	GGGAGGCTGAGGCAGGAG	3	ENST00000558411	1935	hsa-miR-5096	ENST00000558411	2014	ENST00000570974&371&13	ENST00000534904&3142&13	ENST00000601343&685&20	ENST00000565600&219&13	ENST00000597357&115&11
8	GGGAGGCTGAGGCAGGAG	3	ENST00000473592	1606	hsa-miR-5096	ENST00000473592	1683	ENST00000570974&371&13	ENST00000534904&3142&13	ENST00000601343&685&20	ENST00000565600&219&13	ENST00000597357&115&11
8	GGGAGGCTGAGGCAGGAG	3	ENST00000343526	6933	hsa-miR-5096	ENST00000343526	7009	ENST00000570974&371&13	ENST00000534904&3142&13	ENST00000601343&685&20	ENST00000565600&219&13	ENST00000597357&115&11
8	GGGAGGCTGAGGCAGGAG	3	ENST00000409982	830	hsa-miR-5096	ENST00000409982	906	ENST00000570974&371&13	ENST00000534904&3142&13	ENST00000601343&685&20	ENST00000565600&219&13	ENST00000597357&115&11
8	GGGAGGCTGAGGCAGGAG	3	ENST00000378845	1389	hsa-miR-5096	ENST00000378845	1329	ENST00000570974&371&13	ENST00000534904&3142&13	ENST00000601343&685&20	ENST00000565600&219&13	ENST00000597357&115&11
8	GGGAGGCTGAGGCAGGAG	3	ENST00000378845	1389	hsa-miR-5096	ENST00000378845	1464	ENST00000570974&371&13	ENST00000534904&3142&13	ENST00000601343&685&20	ENST00000565600&219&13	ENST00000597357&115&11
8	GGGAGGCTGAGGCAGGAG	3	ENST00000370799	1539	hsa-miR-5096	ENST00000370799	1614	ENST00000570974&371&13	ENST00000534904&3142&13	ENST00000601343&685&20	ENST00000565600&219&13	ENST00000597357&115&11
8	GGGAGGCTGAGGCAGGAG	3	ENST00000484535	1141	hsa-miR-5096	ENST00000484535	1219	ENST00000570974&371&13	ENST00000534904&3142&13	ENST00000601343&685&20	ENST00000565600&219&13	ENST00000597357&115&11
8	GGGAGGCTGAGGCAGGAG	3	ENST00000590227	422	hsa-miR-5096	ENST00000590227	485	ENST00000570974&371&13	ENST00000534904&3142&13	ENST00000601343&685&20	ENST00000565600&219&13	ENST00000597357&115&11
8	GGGAGGCTGAGGCAGGAG	3	ENST00000554660	866	hsa-miR-5096	ENST00000554660	942	ENST00000570974&371&13	ENST00000534904&3142&13	ENST00000601343&685&20	ENST00000565600&219&13	ENST00000597357&115&11
8	GGGAGGCTGAGGCAGGAG	3	ENST00000311089	2111	hsa-miR-5096	ENST00000311089	2187	ENST00000570974&371&13	ENST00000534904&3142&13	ENST00000601343&685&20	ENST00000565600&219&13	ENST00000597357&115&11
8	GGGAGGCTGAGGCAGGAG	3	ENST00000563793	203	hsa-miR-5096	ENST00000563793	282	ENST00000570974&371&13	ENST00000534904&3142&13	ENST00000601343&685&20	ENST00000565600&219&13	ENST00000597357&115&11
8	GGGAGGCTGAGGCAGGAG	3	ENST00000600410	2247	hsa-miR-5096	ENST00000600410	2322	ENST00000570974&371&13	ENST00000534904&3142&13	ENST00000601343&685&20	ENST00000565600&219&13	ENST00000597357&115&11
8	GGGAGGCTGAGGCAGGAG	3	ENST00000563945	298	hsa-miR-5096	ENST00000563945	373	ENST00000570974&371&13	ENST00000534904&3142&13	ENST00000601343&685&20	ENST00000565600&219&13	ENST00000597357&115&11
8	GGGAGGCTGAGGCAGGAG	3	ENST00000423644	4475	hsa-miR-5585-3p	ENST00000423644	4482	ENST00000570974&371&13	ENST00000534904&3142&13	ENST00000601343&685&20	ENST00000565600&219&13	ENST00000597357&115&11
8	GGGAGGCTGAGGCAGGAG	3	ENST00000359484	4348	hsa-miR-5585-3p	ENST00000359484	4355	ENST00000570974&371&13	ENST00000534904&3142&13	ENST00000601343&685&20	ENST00000565600&219&13	ENST00000597357&115&11
8	GGGAGGCTGAGGCAGGAG	3	ENST00000346834	4411	hsa-miR-5585-3p	ENST00000346834	4418	ENST00000570974&371&13	ENST00000534904&3142&13	ENST00000601343&685&20	ENST00000565600&219&13	ENST00000597357&115&11
8	GGGAGGCTGAGGCAGGAG	3	ENST00000480696	437	hsa-miR-5585-3p	ENST00000480696	444	ENST00000570974&371&13	ENST00000534904&3142&13	ENST00000601343&685&20	ENST00000565600&219&13	ENST00000597357&115&11
8	GGGAGGCTGAGGCAGGAG	3	ENST00000394019	4654	hsa-miR-5585-3p	ENST00000394019	4661	ENST00000570974&371&13	ENST00000534904&3142&13	ENST00000601343&685&20	ENST00000565600&219&13	ENST00000597357&115&11
8	GGGAGGCTGAGGCAGGAG	3	ENST00000483195	4882	hsa-miR-5585-3p	ENST00000483195	4889	ENST00000570974&371&13	ENST00000534904&3142&13	ENST00000601343&685&20	ENST00000565600&219&13	ENST00000597357&115&11
8	GGGAGGCTGAGGCAGGAG	3	ENST00000528973	3137	hsa-miR-5585-3p	ENST00000528973	2939	ENST00000570974&371&13	ENST00000534904&3142&13	ENST00000601343&685&20	ENST00000565600&219&13	ENST00000597357&115&11
8	GGGAGGCTGAGGCAGGAG	3	ENST00000586372	3494	hsa-miR-5585-3p	ENST00000586372	3501	ENST00000570974&371&13	ENST00000534904&3142&13	ENST00000601343&685&20	ENST00000565600&219&13	ENST00000597357&115&11
9	CTCCTGACTTCGTGATCCGC	4	ENST00000441724	47	hsa-miR-5095	ENST00000441724	133	ENST00000569936&1926&49	ENST00000588380&405&49	ENST00000417194&4779&49	ENST00000338352&1331&49	ENST00000568692&433&49	ENST00000479790&554&49
10	GTTGGCCAGGCTGGTCTTG	2	ENST00000529187	2814	hsa-miR-1273a	ENST00000529187	2982	ENST00000587586&331&13	ENST00000420821&1229&25	ENST00000422822&2120&25	ENST00000424252&1255&12	ENST00000507938&1435&13	ENST00000571719&1815&10	ENST00000554295&3091&10	ENST00000485225&1813&12	ENST00000527937&3997&12	ENST00000571707&1350&13	ENST00000574301&449&12	ENST00000574225&449&12	ENST00000574615&449&12	ENST00000570826&449&12	ENST00000576481&449&12	ENST00000576068&449&12	ENST00000574981&449&12	ENST00000595787&3933&10	ENST00000593475&3064&13	ENST00000573869&1306&13	ENST00000573869&5340&10	ENST00000573424&1476&10	ENST00000182527&2572&13	ENST00000574518&4513&25	ENST00000216484&3497&10	ENST00000395732&1449&10	ENST00000340855&3933&10	ENST00000542755&449&12	ENST00000479790&579&13	ENST00000569117&99&13	ENST00000449309&2225&13	ENST00000295461&4293&10	ENST00000495050&1439&12	ENST00000477796&323&13	ENST00000553894&1450&12	ENST00000308580&2927&12	ENST00000249700&7906&10	ENST00000487481&949&10
10	GTTGGCCAGGCTGGTCTTG	2	ENST00000531346	2663	hsa-miR-1273a	ENST00000531346	2831	ENST00000587586&331&13	ENST00000420821&1229&25	ENST00000422822&2120&25	ENST00000424252&1255&12	ENST00000507938&1435&13	ENST00000571719&1815&10	ENST00000554295&3091&10	ENST00000485225&1813&12	ENST00000527937&3997&12	ENST00000571707&1350&13	ENST00000574301&449&12	ENST00000574225&449&12	ENST00000574615&449&12	ENST00000570826&449&12	ENST00000576481&449&12	ENST00000576068&449&12	ENST00000574981&449&12	ENST00000595787&3933&10	ENST00000593475&3064&13	ENST00000573869&1306&13	ENST00000573869&5340&10	ENST00000573424&1476&10	ENST00000182527&2572&13	ENST00000574518&4513&25	ENST00000216484&3497&10	ENST00000395732&1449&10	ENST00000340855&3933&10	ENST00000542755&449&12	ENST00000479790&579&13	ENST00000569117&99&13	ENST00000449309&2225&13	ENST00000295461&4293&10	ENST00000495050&1439&12	ENST00000477796&323&13	ENST00000553894&1450&12	ENST00000308580&2927&12	ENST00000249700&7906&10	ENST00000487481&949&10
10	GTTGGCCAGGCTGGTCTTG	2	ENST00000375095	3030	hsa-miR-1273a	ENST00000375095	3198	ENST00000587586&331&13	ENST00000420821&1229&25	ENST00000422822&2120&25	ENST00000424252&1255&12	ENST00000507938&1435&13	ENST00000571719&1815&10	ENST00000554295&3091&10	ENST00000485225&1813&12	ENST00000527937&3997&12	ENST00000571707&1350&13	ENST00000574301&449&12	ENST00000574225&449&12	ENST00000574615&449&12	ENST00000570826&449&12	ENST00000576481&449&12	ENST00000576068&449&12	ENST00000574981&449&12	ENST00000595787&3933&10	ENST00000593475&3064&13	ENST00000573869&1306&13	ENST00000573869&5340&10	ENST00000573424&1476&10	ENST00000182527&2572&13	ENST00000574518&4513&25	ENST00000216484&3497&10	ENST00000395732&1449&10	ENST00000340855&3933&10	ENST00000542755&449&12	ENST00000479790&579&13	ENST00000569117&99&13	ENST00000449309&2225&13	ENST00000295461&4293&10	ENST00000495050&1439&12	ENST00000477796&323&13	ENST00000553894&1450&12	ENST00000308580&2927&12	ENST00000249700&7906&10	ENST00000487481&949&10
10	GTTGGCCAGGCTGGTCTTG	2	ENST00000548157	215	hsa-miR-1972	ENST00000548157	126	ENST00000587586&331&13	ENST00000420821&1229&25	ENST00000422822&2120&25	ENST00000424252&1255&12	ENST00000507938&1435&13	ENST00000571719&1815&10	ENST00000554295&3091&10	ENST00000485225&1813&12	ENST00000527937&3997&12	ENST00000571707&1350&13	ENST00000574301&449&12	ENST00000574225&449&12	ENST00000574615&449&12	ENST00000570826&449&12	ENST00000576481&449&12	ENST00000576068&449&12	ENST00000574981&449&12	ENST00000595787&3933&10	ENST00000593475&3064&13	ENST00000573869&1306&13	ENST00000573869&5340&10	ENST00000573424&1476&10	ENST00000182527&2572&13	ENST00000574518&4513&25	ENST00000216484&3497&10	ENST00000395732&1449&10	ENST00000340855&3933&10	ENST00000542755&449&12	ENST00000479790&579&13	ENST00000569117&99&13	ENST00000449309&2225&13	ENST00000295461&4293&10	ENST00000495050&1439&12	ENST00000477796&323&13	ENST00000553894&1450&12	ENST00000308580&2927&12	ENST00000249700&7906&10	ENST00000487481&949&10
10	GTTGGCCAGGCTGGTCTTG	2	ENST00000547850	215	hsa-miR-1972	ENST00000547850	126	ENST00000587586&331&13	ENST00000420821&1229&25	ENST00000422822&2120&25	ENST00000424252&1255&12	ENST00000507938&1435&13	ENST00000571719&1815&10	ENST00000554295&3091&10	ENST00000485225&1813&12	ENST00000527937&3997&12	ENST00000571707&1350&13	ENST00000574301&449&12	ENST00000574225&449&12	ENST00000574615&449&12	ENST00000570826&449&12	ENST00000576481&449&12	ENST00000576068&449&12	ENST00000574981&449&12	ENST00000595787&3933&10	ENST00000593475&3064&13	ENST00000573869&1306&13	ENST00000573869&5340&10	ENST00000573424&1476&10	ENST00000182527&2572&13	ENST00000574518&4513&25	ENST00000216484&3497&10	ENST00000395732&1449&10	ENST00000340855&3933&10	ENST00000542755&449&12	ENST00000479790&579&13	ENST00000569117&99&13	ENST00000449309&2225&13	ENST00000295461&4293&10	ENST00000495050&1439&12	ENST00000477796&323&13	ENST00000553894&1450&12	ENST00000308580&2927&12	ENST00000249700&7906&10	ENST00000487481&949&10
10	GTTGGCCAGGCTGGTCTTG	2	ENST00000586025	2354	hsa-miR-1273g-3p	ENST00000586025	2505	ENST00000587586&331&13	ENST00000420821&1229&25	ENST00000422822&2120&25	ENST00000424252&1255&12	ENST00000507938&1435&13	ENST00000571719&1815&10	ENST00000554295&3091&10	ENST00000485225&1813&12	ENST00000527937&3997&12	ENST00000571707&1350&13	ENST00000574301&449&12	ENST00000574225&449&12	ENST00000574615&449&12	ENST00000570826&449&12	ENST00000576481&449&12	ENST00000576068&449&12	ENST00000574981&449&12	ENST00000595787&3933&10	ENST00000593475&3064&13	ENST00000573869&1306&13	ENST00000573869&5340&10	ENST00000573424&1476&10	ENST00000182527&2572&13	ENST00000574518&4513&25	ENST00000216484&3497&10	ENST00000395732&1449&10	ENST00000340855&3933&10	ENST00000542755&449&12	ENST00000479790&579&13	ENST00000569117&99&13	ENST00000449309&2225&13	ENST00000295461&4293&10	ENST00000495050&1439&12	ENST00000477796&323&13	ENST00000553894&1450&12	ENST00000308580&2927&12	ENST00000249700&7906&10	ENST00000487481&949&10
10	GTTGGCCAGGCTGGTCTTG	2	ENST00000324238	2058	hsa-miR-1273g-3p	ENST00000324238	2208	ENST00000587586&331&13	ENST00000420821&1229&25	ENST00000422822&2120&25	ENST00000424252&1255&12	ENST00000507938&1435&13	ENST00000571719&1815&10	ENST00000554295&3091&10	ENST00000485225&1813&12	ENST00000527937&3997&12	ENST00000571707&1350&13	ENST00000574301&449&12	ENST00000574225&449&12	ENST00000574615&449&12	ENST00000570826&449&12	ENST00000576481&449&12	ENST00000576068&449&12	ENST00000574981&449&12	ENST00000595787&3933&10	ENST00000593475&3064&13	ENST00000573869&1306&13	ENST00000573869&5340&10	ENST00000573424&1476&10	ENST00000182527&2572&13	ENST00000574518&4513&25	ENST00000216484&3497&10	ENST00000395732&1449&10	ENST00000340855&3933&10	ENST00000542755&449&12	ENST00000479790&579&13	ENST00000569117&99&13	ENST00000449309&2225&13	ENST00000295461&4293&10	ENST00000495050&1439&12	ENST00000477796&323&13	ENST00000553894&1450&12	ENST00000308580&2927&12	ENST00000249700&7906&10	ENST00000487481&949&10
10	GTTGGCCAGGCTGGTCTTG	2	ENST00000487297	147	hsa-miR-1273g-3p	ENST00000487297	296	ENST00000587586&331&13	ENST00000420821&1229&25	ENST00000422822&2120&25	ENST00000424252&1255&12	ENST00000507938&1435&13	ENST00000571719&1815&10	ENST00000554295&3091&10	ENST00000485225&1813&12	ENST00000527937&3997&12	ENST00000571707&1350&13	ENST00000574301&449&12	ENST00000574225&449&12	ENST00000574615&449&12	ENST00000570826&449&12	ENST00000576481&449&12	ENST00000576068&449&12	ENST00000574981&449&12	ENST00000595787&3933&10	ENST00000593475&3064&13	ENST00000573869&1306&13	ENST00000573869&5340&10	ENST00000573424&1476&10	ENST00000182527&2572&13	ENST00000574518&4513&25	ENST00000216484&3497&10	ENST00000395732&1449&10	ENST00000340855&3933&10	ENST00000542755&449&12	ENST00000479790&579&13	ENST00000569117&99&13	ENST00000449309&2225&13	ENST00000295461&4293&10	ENST00000495050&1439&12	ENST00000477796&323&13	ENST00000553894&1450&12	ENST00000308580&2927&12	ENST00000249700&7906&10	ENST00000487481&949&10
10	GTTGGCCAGGCTGGTCTTG	2	ENST00000339296	4827	hsa-miR-1273g-3p	ENST00000339296	4964	ENST00000587586&331&13	ENST00000420821&1229&25	ENST00000422822&2120&25	ENST00000424252&1255&12	ENST00000507938&1435&13	ENST00000571719&1815&10	ENST00000554295&3091&10	ENST00000485225&1813&12	ENST00000527937&3997&12	ENST00000571707&1350&13	ENST00000574301&449&12	ENST00000574225&449&12	ENST00000574615&449&12	ENST00000570826&449&12	ENST00000576481&449&12	ENST00000576068&449&12	ENST00000574981&449&12	ENST00000595787&3933&10	ENST00000593475&3064&13	ENST00000573869&1306&13	ENST00000573869&5340&10	ENST00000573424&1476&10	ENST00000182527&2572&13	ENST00000574518&4513&25	ENST00000216484&3497&10	ENST00000395732&1449&10	ENST00000340855&3933&10	ENST00000542755&449&12	ENST00000479790&579&13	ENST00000569117&99&13	ENST00000449309&2225&13	ENST00000295461&4293&10	ENST00000495050&1439&12	ENST00000477796&323&13	ENST00000553894&1450&12	ENST00000308580&2927&12	ENST00000249700&7906&10	ENST00000487481&949&10
10	GTTGGCCAGGCTGGTCTTG	2	ENST00000462616	2438	hsa-miR-1273g-3p	ENST00000462616	2778	ENST00000587586&331&13	ENST00000420821&1229&25	ENST00000422822&2120&25	ENST00000424252&1255&12	ENST00000507938&1435&13	ENST00000571719&1815&10	ENST00000554295&3091&10	ENST00000485225&1813&12	ENST00000527937&3997&12	ENST00000571707&1350&13	ENST00000574301&449&12	ENST00000574225&449&12	ENST00000574615&449&12	ENST00000570826&449&12	ENST00000576481&449&12	ENST00000576068&449&12	ENST00000574981&449&12	ENST00000595787&3933&10	ENST00000593475&3064&13	ENST00000573869&1306&13	ENST00000573869&5340&10	ENST00000573424&1476&10	ENST00000182527&2572&13	ENST00000574518&4513&25	ENST00000216484&3497&10	ENST00000395732&1449&10	ENST00000340855&3933&10	ENST00000542755&449&12	ENST00000479790&579&13	ENST00000569117&99&13	ENST00000449309&2225&13	ENST00000295461&4293&10	ENST00000495050&1439&12	ENST00000477796&323&13	ENST00000553894&1450&12	ENST00000308580&2927&12	ENST00000249700&7906&10	ENST00000487481&949&10
10	GTTGGCCAGGCTGGTCTTG	2	ENST00000505031	1227	hsa-miR-1273g-3p	ENST00000505031	1377	ENST00000587586&331&13	ENST00000420821&1229&25	ENST00000422822&2120&25	ENST00000424252&1255&12	ENST00000507938&1435&13	ENST00000571719&1815&10	ENST00000554295&3091&10	ENST00000485225&1813&12	ENST00000527937&3997&12	ENST00000571707&1350&13	ENST00000574301&449&12	ENST00000574225&449&12	ENST00000574615&449&12	ENST00000570826&449&12	ENST00000576481&449&12	ENST00000576068&449&12	ENST00000574981&449&12	ENST00000595787&3933&10	ENST00000593475&3064&13	ENST00000573869&1306&13	ENST00000573869&5340&10	ENST00000573424&1476&10	ENST00000182527&2572&13	ENST00000574518&4513&25	ENST00000216484&3497&10	ENST00000395732&1449&10	ENST00000340855&3933&10	ENST00000542755&449&12	ENST00000479790&579&13	ENST00000569117&99&13	ENST00000449309&2225&13	ENST00000295461&4293&10	ENST00000495050&1439&12	ENST00000477796&323&13	ENST00000553894&1450&12	ENST00000308580&2927&12	ENST00000249700&7906&10	ENST00000487481&949&10
11	AATGGCGCGATCTCGGCTCA	2	ENST00000488801	313	hsa-miR-1273e	ENST00000488801	272	ENST00000536584&3182&15	ENST00000430391&493&11
12	ATCTCGGCTCACTGCAACCTCT	3	ENST00000503602	1036	hsa-miR-1273a	ENST00000503602	1066	ENST00000391625&3852&10	ENST00000570148&897&10	ENST00000562696&282&40	ENST00000505153&5608&10	ENST00000426200&1835&10	ENST00000417835&1578&10	ENST00000424349&1844&10	ENST00000486926&484&10	ENST00000418747&2382&10	ENST00000563747&1557&11	ENST00000580094&3975&11	ENST00000449800&3975&11	ENST00000568911&4903&40	ENST00000590745&262&11	ENST00000553985&2283&11	ENST00000441932&1161&10	ENST00000393644&869&40	ENST00000574727&4271&10	ENST00000559989&7713&11	ENST00000445221&3975&11	ENST00000455730&487&11	ENST00000582986&4950&10	ENST00000451482&984&11	ENST00000489790&685&40	ENST00000422508&6840&40	ENST00000437994&7020&40	ENST00000317419&2146&11	ENST00000599568&117&11	ENST00000433590&2103&10	ENST00000359478&2106&10	ENST00000324306&6998&40	ENST00000324306&4405&19	ENST00000324306&6684&11	ENST00000480530&1550&11	ENST00000444549&2269&11	ENST00000455499&1583&11	ENST00000472260&850&11	ENST00000413083&2167&11	ENST00000480046&4195&10	ENST00000480046&4366&10	ENST00000480046&3100&10	ENST00000378746&3724&11
12	ATCTCGGCTCACTGCAACCTCT	3	ENST00000359815	30	hsa-miR-1273a	ENST00000359815	60	ENST00000391625&3852&10	ENST00000570148&897&10	ENST00000562696&282&40	ENST00000505153&5608&10	ENST00000426200&1835&10	ENST00000417835&1578&10	ENST00000424349&1844&10	ENST00000486926&484&10	ENST00000418747&2382&10	ENST00000563747&1557&11	ENST00000580094&3975&11	ENST00000449800&3975&11	ENST00000568911&4903&40	ENST00000590745&262&11	ENST00000553985&2283&11	ENST00000441932&1161&10	ENST00000393644&869&40	ENST00000574727&4271&10	ENST00000559989&7713&11	ENST00000445221&3975&11	ENST00000455730&487&11	ENST00000582986&4950&10	ENST00000451482&984&11	ENST00000489790&685&40	ENST00000422508&6840&40	ENST00000437994&7020&40	ENST00000317419&2146&11	ENST00000599568&117&11	ENST00000433590&2103&10	ENST00000359478&2106&10	ENST00000324306&6998&40	ENST00000324306&4405&19	ENST00000324306&6684&11	ENST00000480530&1550&11	ENST00000444549&2269&11	ENST00000455499&1583&11	ENST00000472260&850&11	ENST00000413083&2167&11	ENST00000480046&4195&10	ENST00000480046&4366&10	ENST00000480046&3100&10	ENST00000378746&3724&11
12	ATCTCGGCTCACTGCAACCTCT	3	ENST00000470464	2427	hsa-miR-1273a	ENST00000470464	2292	ENST00000391625&3852&10	ENST00000570148&897&10	ENST00000562696&282&40	ENST00000505153&5608&10	ENST00000426200&1835&10	ENST00000417835&1578&10	ENST00000424349&1844&10	ENST00000486926&484&10	ENST00000418747&2382&10	ENST00000563747&1557&11	ENST00000580094&3975&11	ENST00000449800&3975&11	ENST00000568911&4903&40	ENST00000590745&262&11	ENST00000553985&2283&11	ENST00000441932&1161&10	ENST00000393644&869&40	ENST00000574727&4271&10	ENST00000559989&7713&11	ENST00000445221&3975&11	ENST00000455730&487&11	ENST00000582986&4950&10	ENST00000451482&984&11	ENST00000489790&685&40	ENST00000422508&6840&40	ENST00000437994&7020&40	ENST00000317419&2146&11	ENST00000599568&117&11	ENST00000433590&2103&10	ENST00000359478&2106&10	ENST00000324306&6998&40	ENST00000324306&4405&19	ENST00000324306&6684&11	ENST00000480530&1550&11	ENST00000444549&2269&11	ENST00000455499&1583&11	ENST00000472260&850&11	ENST00000413083&2167&11	ENST00000480046&4195&10	ENST00000480046&4366&10	ENST00000480046&3100&10	ENST00000378746&3724&11
12	ATCTCGGCTCACTGCAACCTCT	3	ENST00000485585	2427	hsa-miR-1273a	ENST00000485585	2292	ENST00000391625&3852&10	ENST00000570148&897&10	ENST00000562696&282&40	ENST00000505153&5608&10	ENST00000426200&1835&10	ENST00000417835&1578&10	ENST00000424349&1844&10	ENST00000486926&484&10	ENST00000418747&2382&10	ENST00000563747&1557&11	ENST00000580094&3975&11	ENST00000449800&3975&11	ENST00000568911&4903&40	ENST00000590745&262&11	ENST00000553985&2283&11	ENST00000441932&1161&10	ENST00000393644&869&40	ENST00000574727&4271&10	ENST00000559989&7713&11	ENST00000445221&3975&11	ENST00000455730&487&11	ENST00000582986&4950&10	ENST00000451482&984&11	ENST00000489790&685&40	ENST00000422508&6840&40	ENST00000437994&7020&40	ENST00000317419&2146&11	ENST00000599568&117&11	ENST00000433590&2103&10	ENST00000359478&2106&10	ENST00000324306&6998&40	ENST00000324306&4405&19	ENST00000324306&6684&11	ENST00000480530&1550&11	ENST00000444549&2269&11	ENST00000455499&1583&11	ENST00000472260&850&11	ENST00000413083&2167&11	ENST00000480046&4195&10	ENST00000480046&4366&10	ENST00000480046&3100&10	ENST00000378746&3724&11
12	ATCTCGGCTCACTGCAACCTCT	3	ENST00000495194	2426	hsa-miR-1273a	ENST00000495194	2292	ENST00000391625&3852&10	ENST00000570148&897&10	ENST00000562696&282&40	ENST00000505153&5608&10	ENST00000426200&1835&10	ENST00000417835&1578&10	ENST00000424349&1844&10	ENST00000486926&484&10	ENST00000418747&2382&10	ENST00000563747&1557&11	ENST00000580094&3975&11	ENST00000449800&3975&11	ENST00000568911&4903&40	ENST00000590745&262&11	ENST00000553985&2283&11	ENST00000441932&1161&10	ENST00000393644&869&40	ENST00000574727&4271&10	ENST00000559989&7713&11	ENST00000445221&3975&11	ENST00000455730&487&11	ENST00000582986&4950&10	ENST00000451482&984&11	ENST00000489790&685&40	ENST00000422508&6840&40	ENST00000437994&7020&40	ENST00000317419&2146&11	ENST00000599568&117&11	ENST00000433590&2103&10	ENST00000359478&2106&10	ENST00000324306&6998&40	ENST00000324306&4405&19	ENST00000324306&6684&11	ENST00000480530&1550&11	ENST00000444549&2269&11	ENST00000455499&1583&11	ENST00000472260&850&11	ENST00000413083&2167&11	ENST00000480046&4195&10	ENST00000480046&4366&10	ENST00000480046&3100&10	ENST00000378746&3724&11
12	ATCTCGGCTCACTGCAACCTCT	3	ENST00000486105	2425	hsa-miR-1273a	ENST00000486105	2291	ENST00000391625&3852&10	ENST00000570148&897&10	ENST00000562696&282&40	ENST00000505153&5608&10	ENST00000426200&1835&10	ENST00000417835&1578&10	ENST00000424349&1844&10	ENST00000486926&484&10	ENST00000418747&2382&10	ENST00000563747&1557&11	ENST00000580094&3975&11	ENST00000449800&3975&11	ENST00000568911&4903&40	ENST00000590745&262&11	ENST00000553985&2283&11	ENST00000441932&1161&10	ENST00000393644&869&40	ENST00000574727&4271&10	ENST00000559989&7713&11	ENST00000445221&3975&11	ENST00000455730&487&11	ENST00000582986&4950&10	ENST00000451482&984&11	ENST00000489790&685&40	ENST00000422508&6840&40	ENST00000437994&7020&40	ENST00000317419&2146&11	ENST00000599568&117&11	ENST00000433590&2103&10	ENST00000359478&2106&10	ENST00000324306&6998&40	ENST00000324306&4405&19	ENST00000324306&6684&11	ENST00000480530&1550&11	ENST00000444549&2269&11	ENST00000455499&1583&11	ENST00000472260&850&11	ENST00000413083&2167&11	ENST00000480046&4195&10	ENST00000480046&4366&10	ENST00000480046&3100&10	ENST00000378746&3724&11
12	ATCTCGGCTCACTGCAACCTCT	3	ENST00000478207	192	hsa-miR-1273a	ENST00000478207	222	ENST00000391625&3852&10	ENST00000570148&897&10	ENST00000562696&282&40	ENST00000505153&5608&10	ENST00000426200&1835&10	ENST00000417835&1578&10	ENST00000424349&1844&10	ENST00000486926&484&10	ENST00000418747&2382&10	ENST00000563747&1557&11	ENST00000580094&3975&11	ENST00000449800&3975&11	ENST00000568911&4903&40	ENST00000590745&262&11	ENST00000553985&2283&11	ENST00000441932&1161&10	ENST00000393644&869&40	ENST00000574727&4271&10	ENST00000559989&7713&11	ENST00000445221&3975&11	ENST00000455730&487&11	ENST00000582986&4950&10	ENST00000451482&984&11	ENST00000489790&685&40	ENST00000422508&6840&40	ENST00000437994&7020&40	ENST00000317419&2146&11	ENST00000599568&117&11	ENST00000433590&2103&10	ENST00000359478&2106&10	ENST00000324306&6998&40	ENST00000324306&4405&19	ENST00000324306&6684&11	ENST00000480530&1550&11	ENST00000444549&2269&11	ENST00000455499&1583&11	ENST00000472260&850&11	ENST00000413083&2167&11	ENST00000480046&4195&10	ENST00000480046&4366&10	ENST00000480046&3100&10	ENST00000378746&3724&11
12	ATCTCGGCTCACTGCAACCTCT	3	ENST00000475993	2425	hsa-miR-1273a	ENST00000475993	2291	ENST00000391625&3852&10	ENST00000570148&897&10	ENST00000562696&282&40	ENST00000505153&5608&10	ENST00000426200&1835&10	ENST00000417835&1578&10	ENST00000424349&1844&10	ENST00000486926&484&10	ENST00000418747&2382&10	ENST00000563747&1557&11	ENST00000580094&3975&11	ENST00000449800&3975&11	ENST00000568911&4903&40	ENST00000590745&262&11	ENST00000553985&2283&11	ENST00000441932&1161&10	ENST00000393644&869&40	ENST00000574727&4271&10	ENST00000559989&7713&11	ENST00000445221&3975&11	ENST00000455730&487&11	ENST00000582986&4950&10	ENST00000451482&984&11	ENST00000489790&685&40	ENST00000422508&6840&40	ENST00000437994&7020&40	ENST00000317419&2146&11	ENST00000599568&117&11	ENST00000433590&2103&10	ENST00000359478&2106&10	ENST00000324306&6998&40	ENST00000324306&4405&19	ENST00000324306&6684&11	ENST00000480530&1550&11	ENST00000444549&2269&11	ENST00000455499&1583&11	ENST00000472260&850&11	ENST00000413083&2167&11	ENST00000480046&4195&10	ENST00000480046&4366&10	ENST00000480046&3100&10	ENST00000378746&3724&11
12	ATCTCGGCTCACTGCAACCTCT	3	ENST00000494413	2425	hsa-miR-1273a	ENST00000494413	2291	ENST00000391625&3852&10	ENST00000570148&897&10	ENST00000562696&282&40	ENST00000505153&5608&10	ENST00000426200&1835&10	ENST00000417835&1578&10	ENST00000424349&1844&10	ENST00000486926&484&10	ENST00000418747&2382&10	ENST00000563747&1557&11	ENST00000580094&3975&11	ENST00000449800&3975&11	ENST00000568911&4903&40	ENST00000590745&262&11	ENST00000553985&2283&11	ENST00000441932&1161&10	ENST00000393644&869&40	ENST00000574727&4271&10	ENST00000559989&7713&11	ENST00000445221&3975&11	ENST00000455730&487&11	ENST00000582986&4950&10	ENST00000451482&984&11	ENST00000489790&685&40	ENST00000422508&6840&40	ENST00000437994&7020&40	ENST00000317419&2146&11	ENST00000599568&117&11	ENST00000433590&2103&10	ENST00000359478&2106&10	ENST00000324306&6998&40	ENST00000324306&4405&19	ENST00000324306&6684&11	ENST00000480530&1550&11	ENST00000444549&2269&11	ENST00000455499&1583&11	ENST00000472260&850&11	ENST00000413083&2167&11	ENST00000480046&4195&10	ENST00000480046&4366&10	ENST00000480046&3100&10	ENST00000378746&3724&11
12	ATCTCGGCTCACTGCAACCTCT	3	ENST00000475528	2427	hsa-miR-1273a	ENST00000475528	2292	ENST00000391625&3852&10	ENST00000570148&897&10	ENST00000562696&282&40	ENST00000505153&5608&10	ENST00000426200&1835&10	ENST00000417835&1578&10	ENST00000424349&1844&10	ENST00000486926&484&10	ENST00000418747&2382&10	ENST00000563747&1557&11	ENST00000580094&3975&11	ENST00000449800&3975&11	ENST00000568911&4903&40	ENST00000590745&262&11	ENST00000553985&2283&11	ENST00000441932&1161&10	ENST00000393644&869&40	ENST00000574727&4271&10	ENST00000559989&7713&11	ENST00000445221&3975&11	ENST00000455730&487&11	ENST00000582986&4950&10	ENST00000451482&984&11	ENST00000489790&685&40	ENST00000422508&6840&40	ENST00000437994&7020&40	ENST00000317419&2146&11	ENST00000599568&117&11	ENST00000433590&2103&10	ENST00000359478&2106&10	ENST00000324306&6998&40	ENST00000324306&4405&19	ENST00000324306&6684&11	ENST00000480530&1550&11	ENST00000444549&2269&11	ENST00000455499&1583&11	ENST00000472260&850&11	ENST00000413083&2167&11	ENST00000480046&4195&10	ENST00000480046&4366&10	ENST00000480046&3100&10	ENST00000378746&3724&11
12	ATCTCGGCTCACTGCAACCTCT	3	ENST00000465342	3042	hsa-miR-1273g-3p	ENST00000465342	3054	ENST00000391625&3852&10	ENST00000570148&897&10	ENST00000562696&282&40	ENST00000505153&5608&10	ENST00000426200&1835&10	ENST00000417835&1578&10	ENST00000424349&1844&10	ENST00000486926&484&10	ENST00000418747&2382&10	ENST00000563747&1557&11	ENST00000580094&3975&11	ENST00000449800&3975&11	ENST00000568911&4903&40	ENST00000590745&262&11	ENST00000553985&2283&11	ENST00000441932&1161&10	ENST00000393644&869&40	ENST00000574727&4271&10	ENST00000559989&7713&11	ENST00000445221&3975&11	ENST00000455730&487&11	ENST00000582986&4950&10	ENST00000451482&984&11	ENST00000489790&685&40	ENST00000422508&6840&40	ENST00000437994&7020&40	ENST00000317419&2146&11	ENST00000599568&117&11	ENST00000433590&2103&10	ENST00000359478&2106&10	ENST00000324306&6998&40	ENST00000324306&4405&19	ENST00000324306&6684&11	ENST00000480530&1550&11	ENST00000444549&2269&11	ENST00000455499&1583&11	ENST00000472260&850&11	ENST00000413083&2167&11	ENST00000480046&4195&10	ENST00000480046&4366&10	ENST00000480046&3100&10	ENST00000378746&3724&11
12	ATCTCGGCTCACTGCAACCTCT	3	ENST00000518639	956	hsa-miR-1273g-3p	ENST00000518639	968	ENST00000391625&3852&10	ENST00000570148&897&10	ENST00000562696&282&40	ENST00000505153&5608&10	ENST00000426200&1835&10	ENST00000417835&1578&10	ENST00000424349&1844&10	ENST00000486926&484&10	ENST00000418747&2382&10	ENST00000563747&1557&11	ENST00000580094&3975&11	ENST00000449800&3975&11	ENST00000568911&4903&40	ENST00000590745&262&11	ENST00000553985&2283&11	ENST00000441932&1161&10	ENST00000393644&869&40	ENST00000574727&4271&10	ENST00000559989&7713&11	ENST00000445221&3975&11	ENST00000455730&487&11	ENST00000582986&4950&10	ENST00000451482&984&11	ENST00000489790&685&40	ENST00000422508&6840&40	ENST00000437994&7020&40	ENST00000317419&2146&11	ENST00000599568&117&11	ENST00000433590&2103&10	ENST00000359478&2106&10	ENST00000324306&6998&40	ENST00000324306&4405&19	ENST00000324306&6684&11	ENST00000480530&1550&11	ENST00000444549&2269&11	ENST00000455499&1583&11	ENST00000472260&850&11	ENST00000413083&2167&11	ENST00000480046&4195&10	ENST00000480046&4366&10	ENST00000480046&3100&10	ENST00000378746&3724&11
13	GGCCGGGCGCGGTGGCTCACGCCTGT	3	ENST00000563601	838	hsa-miR-5095	ENST00000563601	819	ENST00000221996&1846&18	ENST00000453700&2849&16	ENST00000458142&2382&16
13	GGCCGGGCGCGGTGGCTCACGCCTGT	3	ENST00000531111	220	hsa-miR-5095	ENST00000531111	201	ENST00000221996&1846&18	ENST00000453700&2849&16	ENST00000458142&2382&16
13	GGCCGGGCGCGGTGGCTCACGCCTGT	3	ENST00000562760	1006	hsa-miR-5096	ENST00000562760	913	ENST00000221996&1846&18	ENST00000453700&2849&16	ENST00000458142&2382&16
13	GGCCGGGCGCGGTGGCTCACGCCTGT	3	ENST00000506791	110	hsa-miR-5095	ENST00000506791	91	ENST00000221996&1846&18	ENST00000453700&2849&16	ENST00000458142&2382&16
13	GGCCGGGCGCGGTGGCTCACGCCTGT	3	ENST00000509036	164	hsa-miR-5095	ENST00000509036	145	ENST00000221996&1846&18	ENST00000453700&2849&16	ENST00000458142&2382&16
13	GGCCGGGCGCGGTGGCTCACGCCTGT	3	ENST00000563747	1334	hsa-miR-5095	ENST00000563747	1315	ENST00000221996&1846&18	ENST00000453700&2849&16	ENST00000458142&2382&16
13	GGCCGGGCGCGGTGGCTCACGCCTGT	3	ENST00000586798	3069	hsa-miR-5095	ENST00000586798	3050	ENST00000221996&1846&18	ENST00000453700&2849&16	ENST00000458142&2382&16
13	GGCCGGGCGCGGTGGCTCACGCCTGT	3	ENST00000528804	1993	hsa-miR-5095	ENST00000528804	1974	ENST00000221996&1846&18	ENST00000453700&2849&16	ENST00000458142&2382&16
13	GGCCGGGCGCGGTGGCTCACGCCTGT	3	ENST00000506037	277	hsa-miR-5095	ENST00000506037	258	ENST00000221996&1846&18	ENST00000453700&2849&16	ENST00000458142&2382&16
13	GGCCGGGCGCGGTGGCTCACGCCTGT	3	ENST00000317872	2290	hsa-miR-5095	ENST00000317872	2271	ENST00000221996&1846&18	ENST00000453700&2849&16	ENST00000458142&2382&16
13	GGCCGGGCGCGGTGGCTCACGCCTGT	3	ENST00000547118	206	hsa-miR-5095	ENST00000547118	187	ENST00000221996&1846&18	ENST00000453700&2849&16	ENST00000458142&2382&16
13	GGCCGGGCGCGGTGGCTCACGCCTGT	3	ENST00000510256	656	hsa-miR-5585-3p	ENST00000510256	485	ENST00000221996&1846&18	ENST00000453700&2849&16	ENST00000458142&2382&16
13	GGCCGGGCGCGGTGGCTCACGCCTGT	3	ENST00000489074	656	hsa-miR-5585-3p	ENST00000489074	485	ENST00000221996&1846&18	ENST00000453700&2849&16	ENST00000458142&2382&16
13	GGCCGGGCGCGGTGGCTCACGCCTGT	3	ENST00000576928	2428	hsa-miR-5095	ENST00000576928	2409	ENST00000221996&1846&18	ENST00000453700&2849&16	ENST00000458142&2382&16
13	GGCCGGGCGCGGTGGCTCACGCCTGT	3	ENST00000574314	2345	hsa-miR-5095	ENST00000574314	2326	ENST00000221996&1846&18	ENST00000453700&2849&16	ENST00000458142&2382&16
13	GGCCGGGCGCGGTGGCTCACGCCTGT	3	ENST00000573669	1460	hsa-miR-5095	ENST00000573669	1441	ENST00000221996&1846&18	ENST00000453700&2849&16	ENST00000458142&2382&16
13	GGCCGGGCGCGGTGGCTCACGCCTGT	3	ENST00000598033	110	hsa-miR-5095	ENST00000598033	91	ENST00000221996&1846&18	ENST00000453700&2849&16	ENST00000458142&2382&16
13	GGCCGGGCGCGGTGGCTCACGCCTGT	3	ENST00000599759	159	hsa-miR-5095	ENST00000599759	140	ENST00000221996&1846&18	ENST00000453700&2849&16	ENST00000458142&2382&16
13	GGCCGGGCGCGGTGGCTCACGCCTGT	3	ENST00000491289	4196	hsa-miR-5096	ENST00000491289	4097	ENST00000221996&1846&18	ENST00000453700&2849&16	ENST00000458142&2382&16
13	GGCCGGGCGCGGTGGCTCACGCCTGT	3	ENST00000574773	2509	hsa-miR-5095	ENST00000574773	2490	ENST00000221996&1846&18	ENST00000453700&2849&16	ENST00000458142&2382&16
13	GGCCGGGCGCGGTGGCTCACGCCTGT	3	ENST00000338352	1271	hsa-miR-5095	ENST00000338352	1252	ENST00000221996&1846&18	ENST00000453700&2849&16	ENST00000458142&2382&16
13	GGCCGGGCGCGGTGGCTCACGCCTGT	3	ENST00000575379	820	hsa-miR-5095	ENST00000575379	801	ENST00000221996&1846&18	ENST00000453700&2849&16	ENST00000458142&2382&16
13	GGCCGGGCGCGGTGGCTCACGCCTGT	3	ENST00000576360	1576	hsa-miR-5095	ENST00000576360	1557	ENST00000221996&1846&18	ENST00000453700&2849&16	ENST00000458142&2382&16
13	GGCCGGGCGCGGTGGCTCACGCCTGT	3	ENST00000306071	1904	hsa-miR-5095	ENST00000306071	1885	ENST00000221996&1846&18	ENST00000453700&2849&16	ENST00000458142&2382&16
13	GGCCGGGCGCGGTGGCTCACGCCTGT	3	ENST00000470730	1990	hsa-miR-5095	ENST00000470730	1971	ENST00000221996&1846&18	ENST00000453700&2849&16	ENST00000458142&2382&16
13	GGCCGGGCGCGGTGGCTCACGCCTGT	3	ENST00000597060	1764	hsa-miR-5096	ENST00000597060	1668	ENST00000221996&1846&18	ENST00000453700&2849&16	ENST00000458142&2382&16
13	GGCCGGGCGCGGTGGCTCACGCCTGT	3	ENST00000513146	672	hsa-miR-5585-3p	ENST00000513146	505	ENST00000221996&1846&18	ENST00000453700&2849&16	ENST00000458142&2382&16
14	TAGTAGAGATGGGGTTTC	2	ENST00000521861	1718	hsa-miR-1285-3p	ENST00000521861	1860	ENST00000600661&1241&23
14	TAGTAGAGATGGGGTTTC	2	ENST00000562449	22	hsa-miR-1273a	ENST00000562449	166	ENST00000600661&1241&23
14	TAGTAGAGATGGGGTTTC	2	ENST00000471144	460	hsa-miR-1273a	ENST00000471144	605	ENST00000600661&1241&23
14	TAGTAGAGATGGGGTTTC	2	ENST00000484427	1963	hsa-miR-1273a	ENST00000484427	2108	ENST00000600661&1241&23
14	TAGTAGAGATGGGGTTTC	2	ENST00000590071	4399	hsa-miR-1273c	ENST00000590071	4243	ENST00000600661&1241&23
14	TAGTAGAGATGGGGTTTC	2	ENST00000481579	1847	hsa-miR-1273d	ENST00000481579	1935	ENST00000600661&1241&23
14	TAGTAGAGATGGGGTTTC	2	ENST00000231498	7287	hsa-miR-1273e	ENST00000231498	7377	ENST00000600661&1241&23
14	TAGTAGAGATGGGGTTTC	2	ENST00000537526	3601	hsa-miR-1273e	ENST00000537526	3684	ENST00000600661&1241&23
14	TAGTAGAGATGGGGTTTC	2	ENST00000261497	3841	hsa-miR-1273e	ENST00000261497	3924	ENST00000600661&1241&23
14	TAGTAGAGATGGGGTTTC	2	ENST00000455424	653	hsa-miR-1273g-3p	ENST00000455424	780	ENST00000600661&1241&23
14	TAGTAGAGATGGGGTTTC	2	ENST00000586025	2354	hsa-miR-1273g-3p	ENST00000586025	2482	ENST00000600661&1241&23
14	TAGTAGAGATGGGGTTTC	2	ENST00000480612	266	hsa-miR-1273f	ENST00000480612	358	ENST00000600661&1241&23
14	TAGTAGAGATGGGGTTTC	2	ENST00000315901	157	hsa-miR-1273g-3p	ENST00000315901	283	ENST00000600661&1241&23
14	TAGTAGAGATGGGGTTTC	2	ENST00000512591	377	hsa-miR-1273g-3p	ENST00000512591	505	ENST00000600661&1241&23
14	TAGTAGAGATGGGGTTTC	2	ENST00000540033	4651	hsa-miR-1273g-3p	ENST00000540033	4777	ENST00000600661&1241&23
14	TAGTAGAGATGGGGTTTC	2	ENST00000370331	4685	hsa-miR-1273g-3p	ENST00000370331	4811	ENST00000600661&1241&23
14	TAGTAGAGATGGGGTTTC	2	ENST00000465342	3042	hsa-miR-1273g-3p	ENST00000465342	3169	ENST00000600661&1241&23
14	TAGTAGAGATGGGGTTTC	2	ENST00000462616	2438	hsa-miR-1273g-3p	ENST00000462616	2755	ENST00000600661&1241&23
14	TAGTAGAGATGGGGTTTC	2	ENST00000505031	1227	hsa-miR-1273g-3p	ENST00000505031	1354	ENST00000600661&1241&23
14	TAGTAGAGATGGGGTTTC	2	ENST00000600850	868	hsa-miR-1273g-3p	ENST00000600850	992	ENST00000600661&1241&23
15	TTTAGTAGAGACGGGGTTTCG	2	ENST00000359680	1588	hsa-miR-1273e	ENST00000359680	1669	ENST00000545511&2624&27
15	TTTAGTAGAGACGGGGTTTCG	2	ENST00000453655	1751	hsa-miR-1273e	ENST00000453655	1832	ENST00000545511&2624&27
15	TTTAGTAGAGACGGGGTTTCG	2	ENST00000380579	1651	hsa-miR-1273e	ENST00000380579	1732	ENST00000545511&2624&27
15	TTTAGTAGAGACGGGGTTTCG	2	ENST00000487297	147	hsa-miR-1273g-3p	ENST00000487297	271	ENST00000545511&2624&27
16	AGATCGCGCCACTGCACTCCAGC	2	ENST00000595787	5312	hsa-miR-5095	ENST00000595787	5522	ENST00000542197&293&10
16	AGATCGCGCCACTGCACTCCAGC	2	ENST00000548445	44	hsa-miR-5095	ENST00000548445	256	ENST00000542197&293&10
16	AGATCGCGCCACTGCACTCCAGC	2	ENST00000340855	5312	hsa-miR-5095	ENST00000340855	5522	ENST00000542197&293&10
16	AGATCGCGCCACTGCACTCCAGC	2	ENST00000322753	2459	hsa-miR-5585-3p	ENST00000322753	2523	ENST00000542197&293&10
16	AGATCGCGCCACTGCACTCCAGC	2	ENST00000358661	2505	hsa-miR-5585-3p	ENST00000358661	2569	ENST00000542197&293&10
16	AGATCGCGCCACTGCACTCCAGC	2	ENST00000354278	3231	hsa-miR-5585-3p	ENST00000354278	3295	ENST00000542197&293&10
16	AGATCGCGCCACTGCACTCCAGC	2	ENST00000351894	3402	hsa-miR-5585-3p	ENST00000351894	3466	ENST00000542197&293&10
16	AGATCGCGCCACTGCACTCCAGC	2	ENST00000535162	3567	hsa-miR-5585-3p	ENST00000535162	3631	ENST00000542197&293&10
16	AGATCGCGCCACTGCACTCCAGC	2	ENST00000324134	3687	hsa-miR-5585-3p	ENST00000324134	3751	ENST00000542197&293&10
17	CATGTTGGCCAGGATGGT	2	ENST00000357137	6056	hsa-miR-1273a	ENST00000357137	6220	ENST00000577176&635&13	ENST00000576086&740&13	ENST00000562802&244&18	ENST00000575402&899&13	ENST00000583416&862&13	ENST00000377448&551&11	ENST00000526892&201&13	ENST00000340681&334&13	ENST00000447755&560&18	ENST00000585083&363&13	ENST00000511176&143&13	ENST00000456951&363&13	ENST00000595883&2306&18	ENST00000424881&3580&13	ENST00000419215&3256&13	ENST00000494357&4713&13	ENST00000394163&3438&13	ENST00000425063&3548&13	ENST00000448418&5431&13	ENST00000262735&2282&18	ENST00000396000&2365&18	ENST00000407236&2313&18	ENST00000504157&1724&11	ENST00000511313&823&11	ENST00000424341&1008&18	ENST00000397415&1512&18	ENST00000493763&1400&18	ENST00000222693&2257&13	ENST00000531805&40&13	ENST00000361424&2887&18	ENST00000506111&3261&18	ENST00000308973&3383&18	ENST00000393643&5863&18	ENST00000443118&3386&18	ENST00000414498&1475&11	ENST00000263468&5988&18	ENST00000585058&5001&11	ENST00000288177&3027&13	ENST00000561643&1294&13	ENST00000421528&1914&13	ENST00000501271&1093&13
17	CATGTTGGCCAGGATGGT	2	ENST00000563972	987	hsa-miR-1972	ENST00000563972	1378	ENST00000577176&635&13	ENST00000576086&740&13	ENST00000562802&244&18	ENST00000575402&899&13	ENST00000583416&862&13	ENST00000377448&551&11	ENST00000526892&201&13	ENST00000340681&334&13	ENST00000447755&560&18	ENST00000585083&363&13	ENST00000511176&143&13	ENST00000456951&363&13	ENST00000595883&2306&18	ENST00000424881&3580&13	ENST00000419215&3256&13	ENST00000494357&4713&13	ENST00000394163&3438&13	ENST00000425063&3548&13	ENST00000448418&5431&13	ENST00000262735&2282&18	ENST00000396000&2365&18	ENST00000407236&2313&18	ENST00000504157&1724&11	ENST00000511313&823&11	ENST00000424341&1008&18	ENST00000397415&1512&18	ENST00000493763&1400&18	ENST00000222693&2257&13	ENST00000531805&40&13	ENST00000361424&2887&18	ENST00000506111&3261&18	ENST00000308973&3383&18	ENST00000393643&5863&18	ENST00000443118&3386&18	ENST00000414498&1475&11	ENST00000263468&5988&18	ENST00000585058&5001&11	ENST00000288177&3027&13	ENST00000561643&1294&13	ENST00000421528&1914&13	ENST00000501271&1093&13
17	CATGTTGGCCAGGATGGT	2	ENST00000450492	111	hsa-miR-1273e	ENST00000450492	210	ENST00000577176&635&13	ENST00000576086&740&13	ENST00000562802&244&18	ENST00000575402&899&13	ENST00000583416&862&13	ENST00000377448&551&11	ENST00000526892&201&13	ENST00000340681&334&13	ENST00000447755&560&18	ENST00000585083&363&13	ENST00000511176&143&13	ENST00000456951&363&13	ENST00000595883&2306&18	ENST00000424881&3580&13	ENST00000419215&3256&13	ENST00000494357&4713&13	ENST00000394163&3438&13	ENST00000425063&3548&13	ENST00000448418&5431&13	ENST00000262735&2282&18	ENST00000396000&2365&18	ENST00000407236&2313&18	ENST00000504157&1724&11	ENST00000511313&823&11	ENST00000424341&1008&18	ENST00000397415&1512&18	ENST00000493763&1400&18	ENST00000222693&2257&13	ENST00000531805&40&13	ENST00000361424&2887&18	ENST00000506111&3261&18	ENST00000308973&3383&18	ENST00000393643&5863&18	ENST00000443118&3386&18	ENST00000414498&1475&11	ENST00000263468&5988&18	ENST00000585058&5001&11	ENST00000288177&3027&13	ENST00000561643&1294&13	ENST00000421528&1914&13	ENST00000501271&1093&13
17	CATGTTGGCCAGGATGGT	2	ENST00000455424	653	hsa-miR-1273g-3p	ENST00000455424	800	ENST00000577176&635&13	ENST00000576086&740&13	ENST00000562802&244&18	ENST00000575402&899&13	ENST00000583416&862&13	ENST00000377448&551&11	ENST00000526892&201&13	ENST00000340681&334&13	ENST00000447755&560&18	ENST00000585083&363&13	ENST00000511176&143&13	ENST00000456951&363&13	ENST00000595883&2306&18	ENST00000424881&3580&13	ENST00000419215&3256&13	ENST00000494357&4713&13	ENST00000394163&3438&13	ENST00000425063&3548&13	ENST00000448418&5431&13	ENST00000262735&2282&18	ENST00000396000&2365&18	ENST00000407236&2313&18	ENST00000504157&1724&11	ENST00000511313&823&11	ENST00000424341&1008&18	ENST00000397415&1512&18	ENST00000493763&1400&18	ENST00000222693&2257&13	ENST00000531805&40&13	ENST00000361424&2887&18	ENST00000506111&3261&18	ENST00000308973&3383&18	ENST00000393643&5863&18	ENST00000443118&3386&18	ENST00000414498&1475&11	ENST00000263468&5988&18	ENST00000585058&5001&11	ENST00000288177&3027&13	ENST00000561643&1294&13	ENST00000421528&1914&13	ENST00000501271&1093&13
17	CATGTTGGCCAGGATGGT	2	ENST00000523129	1746	hsa-miR-1273g-3p	ENST00000523129	1293	ENST00000577176&635&13	ENST00000576086&740&13	ENST00000562802&244&18	ENST00000575402&899&13	ENST00000583416&862&13	ENST00000377448&551&11	ENST00000526892&201&13	ENST00000340681&334&13	ENST00000447755&560&18	ENST00000585083&363&13	ENST00000511176&143&13	ENST00000456951&363&13	ENST00000595883&2306&18	ENST00000424881&3580&13	ENST00000419215&3256&13	ENST00000494357&4713&13	ENST00000394163&3438&13	ENST00000425063&3548&13	ENST00000448418&5431&13	ENST00000262735&2282&18	ENST00000396000&2365&18	ENST00000407236&2313&18	ENST00000504157&1724&11	ENST00000511313&823&11	ENST00000424341&1008&18	ENST00000397415&1512&18	ENST00000493763&1400&18	ENST00000222693&2257&13	ENST00000531805&40&13	ENST00000361424&2887&18	ENST00000506111&3261&18	ENST00000308973&3383&18	ENST00000393643&5863&18	ENST00000443118&3386&18	ENST00000414498&1475&11	ENST00000263468&5988&18	ENST00000585058&5001&11	ENST00000288177&3027&13	ENST00000561643&1294&13	ENST00000421528&1914&13	ENST00000501271&1093&13
17	CATGTTGGCCAGGATGGT	2	ENST00000416209	1746	hsa-miR-1273g-3p	ENST00000416209	1293	ENST00000577176&635&13	ENST00000576086&740&13	ENST00000562802&244&18	ENST00000575402&899&13	ENST00000583416&862&13	ENST00000377448&551&11	ENST00000526892&201&13	ENST00000340681&334&13	ENST00000447755&560&18	ENST00000585083&363&13	ENST00000511176&143&13	ENST00000456951&363&13	ENST00000595883&2306&18	ENST00000424881&3580&13	ENST00000419215&3256&13	ENST00000494357&4713&13	ENST00000394163&3438&13	ENST00000425063&3548&13	ENST00000448418&5431&13	ENST00000262735&2282&18	ENST00000396000&2365&18	ENST00000407236&2313&18	ENST00000504157&1724&11	ENST00000511313&823&11	ENST00000424341&1008&18	ENST00000397415&1512&18	ENST00000493763&1400&18	ENST00000222693&2257&13	ENST00000531805&40&13	ENST00000361424&2887&18	ENST00000506111&3261&18	ENST00000308973&3383&18	ENST00000393643&5863&18	ENST00000443118&3386&18	ENST00000414498&1475&11	ENST00000263468&5988&18	ENST00000585058&5001&11	ENST00000288177&3027&13	ENST00000561643&1294&13	ENST00000421528&1914&13	ENST00000501271&1093&13
17	CATGTTGGCCAGGATGGT	2	ENST00000592904	879	hsa-miR-1273g-3p	ENST00000592904	1027	ENST00000577176&635&13	ENST00000576086&740&13	ENST00000562802&244&18	ENST00000575402&899&13	ENST00000583416&862&13	ENST00000377448&551&11	ENST00000526892&201&13	ENST00000340681&334&13	ENST00000447755&560&18	ENST00000585083&363&13	ENST00000511176&143&13	ENST00000456951&363&13	ENST00000595883&2306&18	ENST00000424881&3580&13	ENST00000419215&3256&13	ENST00000494357&4713&13	ENST00000394163&3438&13	ENST00000425063&3548&13	ENST00000448418&5431&13	ENST00000262735&2282&18	ENST00000396000&2365&18	ENST00000407236&2313&18	ENST00000504157&1724&11	ENST00000511313&823&11	ENST00000424341&1008&18	ENST00000397415&1512&18	ENST00000493763&1400&18	ENST00000222693&2257&13	ENST00000531805&40&13	ENST00000361424&2887&18	ENST00000506111&3261&18	ENST00000308973&3383&18	ENST00000393643&5863&18	ENST00000443118&3386&18	ENST00000414498&1475&11	ENST00000263468&5988&18	ENST00000585058&5001&11	ENST00000288177&3027&13	ENST00000561643&1294&13	ENST00000421528&1914&13	ENST00000501271&1093&13
18	TCAGGCTGGAGTGCAGTGGCA	2	ENST00000586025	2354	hsa-miR-1273g-3p	ENST00000586025	2172	ENST00000505153&5631&16
18	TCAGGCTGGAGTGCAGTGGCA	2	ENST00000518639	956	hsa-miR-1273g-3p	ENST00000518639	945	ENST00000505153&5631&16
18	TCAGGCTGGAGTGCAGTGGCA	2	ENST00000369066	6364	hsa-miR-1273g-3p	ENST00000369066	6353	ENST00000505153&5631&16
18	TCAGGCTGGAGTGCAGTGGCA	2	ENST00000564309	366	hsa-miR-1273g-3p	ENST00000564309	355	ENST00000505153&5631&16
18	TCAGGCTGGAGTGCAGTGGCA	2	ENST00000462315	3700	hsa-miR-1273g-3p	ENST00000462315	3689	ENST00000505153&5631&16
18	TCAGGCTGGAGTGCAGTGGCA	2	ENST00000592904	879	hsa-miR-1273g-3p	ENST00000592904	868	ENST00000505153&5631&16
18	TCAGGCTGGAGTGCAGTGGCA	2	ENST00000462616	2438	hsa-miR-1273g-3p	ENST00000462616	2427	ENST00000505153&5631&16
18	TCAGGCTGGAGTGCAGTGGCA	2	ENST00000474456	999	hsa-miR-1273g-3p	ENST00000474456	988	ENST00000505153&5631&16
18	TCAGGCTGGAGTGCAGTGGCA	2	ENST00000380079	3054	hsa-miR-1273g-3p	ENST00000380079	3043	ENST00000505153&5631&16
18	TCAGGCTGGAGTGCAGTGGCA	2	ENST00000464571	1286	hsa-miR-1273g-3p	ENST00000464571	1275	ENST00000505153&5631&16
18	TCAGGCTGGAGTGCAGTGGCA	2	ENST00000308062	1289	hsa-miR-1273g-3p	ENST00000308062	1278	ENST00000505153&5631&16
18	TCAGGCTGGAGTGCAGTGGCA	2	ENST00000527570	245	hsa-miR-1273g-3p	ENST00000527570	234	ENST00000505153&5631&16
18	TCAGGCTGGAGTGCAGTGGCA	2	ENST00000511063	1244	hsa-miR-1273g-3p	ENST00000511063	1233	ENST00000505153&5631&16
18	TCAGGCTGGAGTGCAGTGGCA	2	ENST00000448248	904	hsa-miR-1273g-3p	ENST00000448248	893	ENST00000505153&5631&16
18	TCAGGCTGGAGTGCAGTGGCA	2	ENST00000514664	2941	hsa-miR-1273g-3p	ENST00000514664	2930	ENST00000505153&5631&16
18	TCAGGCTGGAGTGCAGTGGCA	2	ENST00000459674	1161	hsa-miR-1273g-3p	ENST00000459674	1150	ENST00000505153&5631&16
18	TCAGGCTGGAGTGCAGTGGCA	2	ENST00000403385	1283	hsa-miR-1273g-3p	ENST00000403385	1272	ENST00000505153&5631&16
19	GAGGCTGAGGCAGATGGA	2	ENST00000574596	1312	hsa-miR-5095	ENST00000574596	1335	ENST00000492957&361&15
20	GGTGGATCACCTGAGGTCAGGAGT	2	ENST00000523271	8143	hsa-miR-5095	ENST00000523271	8178	ENST00000552364&479&11	ENST00000575137&2801&11	ENST00000565256&521&11	ENST00000565256&969&11	ENST00000566583&625&11	ENST00000566583&1073&11	ENST00000434411&1423&11	ENST00000434411&1871&11	ENST00000601776&2537&11	ENST00000568695&498&11	ENST00000356949&1067&11	ENST00000483240&307&11	ENST00000393641&195&11	ENST00000413262&195&11	ENST00000424815&195&11	ENST00000393756&195&11	ENST00000479959&3117&11	ENST00000354286&2466&11	ENST00000319863&2850&11	ENST00000566915&2554&11	ENST00000262134&2656&11	ENST00000418464&2412&11	ENST00000559377&700&11	ENST00000397622&2437&11	ENST00000304567&3137&11	ENST00000360566&3137&11	ENST00000473946&1176&11	ENST00000265641&4257&11	ENST00000592700&723&11	ENST00000564265&2152&11	ENST00000372653&256&11	ENST00000586025&2557&11	ENST00000586025&2076&11	ENST00000550412&1469&11	ENST00000448637&2602&11	ENST00000358337&2336&11	ENST00000453471&137&11	ENST00000357428&3298&11	ENST00000370793&3645&11	ENST00000481579&2009&11	ENST00000370794&3466&11	ENST00000398863&3976&11
20	GGTGGATCACCTGAGGTCAGGAGT	2	ENST00000531111	220	hsa-miR-5095	ENST00000531111	255	ENST00000552364&479&11	ENST00000575137&2801&11	ENST00000565256&521&11	ENST00000565256&969&11	ENST00000566583&625&11	ENST00000566583&1073&11	ENST00000434411&1423&11	ENST00000434411&1871&11	ENST00000601776&2537&11	ENST00000568695&498&11	ENST00000356949&1067&11	ENST00000483240&307&11	ENST00000393641&195&11	ENST00000413262&195&11	ENST00000424815&195&11	ENST00000393756&195&11	ENST00000479959&3117&11	ENST00000354286&2466&11	ENST00000319863&2850&11	ENST00000566915&2554&11	ENST00000262134&2656&11	ENST00000418464&2412&11	ENST00000559377&700&11	ENST00000397622&2437&11	ENST00000304567&3137&11	ENST00000360566&3137&11	ENST00000473946&1176&11	ENST00000265641&4257&11	ENST00000592700&723&11	ENST00000564265&2152&11	ENST00000372653&256&11	ENST00000586025&2557&11	ENST00000586025&2076&11	ENST00000550412&1469&11	ENST00000448637&2602&11	ENST00000358337&2336&11	ENST00000453471&137&11	ENST00000357428&3298&11	ENST00000370793&3645&11	ENST00000481579&2009&11	ENST00000370794&3466&11	ENST00000398863&3976&11
20	GGTGGATCACCTGAGGTCAGGAGT	2	ENST00000571914	389	hsa-miR-5095	ENST00000571914	424	ENST00000552364&479&11	ENST00000575137&2801&11	ENST00000565256&521&11	ENST00000565256&969&11	ENST00000566583&625&11	ENST00000566583&1073&11	ENST00000434411&1423&11	ENST00000434411&1871&11	ENST00000601776&2537&11	ENST00000568695&498&11	ENST00000356949&1067&11	ENST00000483240&307&11	ENST00000393641&195&11	ENST00000413262&195&11	ENST00000424815&195&11	ENST00000393756&195&11	ENST00000479959&3117&11	ENST00000354286&2466&11	ENST00000319863&2850&11	ENST00000566915&2554&11	ENST00000262134&2656&11	ENST00000418464&2412&11	ENST00000559377&700&11	ENST00000397622&2437&11	ENST00000304567&3137&11	ENST00000360566&3137&11	ENST00000473946&1176&11	ENST00000265641&4257&11	ENST00000592700&723&11	ENST00000564265&2152&11	ENST00000372653&256&11	ENST00000586025&2557&11	ENST00000586025&2076&11	ENST00000550412&1469&11	ENST00000448637&2602&11	ENST00000358337&2336&11	ENST00000453471&137&11	ENST00000357428&3298&11	ENST00000370793&3645&11	ENST00000481579&2009&11	ENST00000370794&3466&11	ENST00000398863&3976&11
20	GGTGGATCACCTGAGGTCAGGAGT	2	ENST00000596577	1955	hsa-miR-5095	ENST00000596577	1990	ENST00000552364&479&11	ENST00000575137&2801&11	ENST00000565256&521&11	ENST00000565256&969&11	ENST00000566583&625&11	ENST00000566583&1073&11	ENST00000434411&1423&11	ENST00000434411&1871&11	ENST00000601776&2537&11	ENST00000568695&498&11	ENST00000356949&1067&11	ENST00000483240&307&11	ENST00000393641&195&11	ENST00000413262&195&11	ENST00000424815&195&11	ENST00000393756&195&11	ENST00000479959&3117&11	ENST00000354286&2466&11	ENST00000319863&2850&11	ENST00000566915&2554&11	ENST00000262134&2656&11	ENST00000418464&2412&11	ENST00000559377&700&11	ENST00000397622&2437&11	ENST00000304567&3137&11	ENST00000360566&3137&11	ENST00000473946&1176&11	ENST00000265641&4257&11	ENST00000592700&723&11	ENST00000564265&2152&11	ENST00000372653&256&11	ENST00000586025&2557&11	ENST00000586025&2076&11	ENST00000550412&1469&11	ENST00000448637&2602&11	ENST00000358337&2336&11	ENST00000453471&137&11	ENST00000357428&3298&11	ENST00000370793&3645&11	ENST00000481579&2009&11	ENST00000370794&3466&11	ENST00000398863&3976&11
20	GGTGGATCACCTGAGGTCAGGAGT	2	ENST00000510711	1229	hsa-miR-5096	ENST00000510711	1539	ENST00000552364&479&11	ENST00000575137&2801&11	ENST00000565256&521&11	ENST00000565256&969&11	ENST00000566583&625&11	ENST00000566583&1073&11	ENST00000434411&1423&11	ENST00000434411&1871&11	ENST00000601776&2537&11	ENST00000568695&498&11	ENST00000356949&1067&11	ENST00000483240&307&11	ENST00000393641&195&11	ENST00000413262&195&11	ENST00000424815&195&11	ENST00000393756&195&11	ENST00000479959&3117&11	ENST00000354286&2466&11	ENST00000319863&2850&11	ENST00000566915&2554&11	ENST00000262134&2656&11	ENST00000418464&2412&11	ENST00000559377&700&11	ENST00000397622&2437&11	ENST00000304567&3137&11	ENST00000360566&3137&11	ENST00000473946&1176&11	ENST00000265641&4257&11	ENST00000592700&723&11	ENST00000564265&2152&11	ENST00000372653&256&11	ENST00000586025&2557&11	ENST00000586025&2076&11	ENST00000550412&1469&11	ENST00000448637&2602&11	ENST00000358337&2336&11	ENST00000453471&137&11	ENST00000357428&3298&11	ENST00000370793&3645&11	ENST00000481579&2009&11	ENST00000370794&3466&11	ENST00000398863&3976&11
20	GGTGGATCACCTGAGGTCAGGAGT	2	ENST00000409982	830	hsa-miR-5096	ENST00000409982	785	ENST00000552364&479&11	ENST00000575137&2801&11	ENST00000565256&521&11	ENST00000565256&969&11	ENST00000566583&625&11	ENST00000566583&1073&11	ENST00000434411&1423&11	ENST00000434411&1871&11	ENST00000601776&2537&11	ENST00000568695&498&11	ENST00000356949&1067&11	ENST00000483240&307&11	ENST00000393641&195&11	ENST00000413262&195&11	ENST00000424815&195&11	ENST00000393756&195&11	ENST00000479959&3117&11	ENST00000354286&2466&11	ENST00000319863&2850&11	ENST00000566915&2554&11	ENST00000262134&2656&11	ENST00000418464&2412&11	ENST00000559377&700&11	ENST00000397622&2437&11	ENST00000304567&3137&11	ENST00000360566&3137&11	ENST00000473946&1176&11	ENST00000265641&4257&11	ENST00000592700&723&11	ENST00000564265&2152&11	ENST00000372653&256&11	ENST00000586025&2557&11	ENST00000586025&2076&11	ENST00000550412&1469&11	ENST00000448637&2602&11	ENST00000358337&2336&11	ENST00000453471&137&11	ENST00000357428&3298&11	ENST00000370793&3645&11	ENST00000481579&2009&11	ENST00000370794&3466&11	ENST00000398863&3976&11
20	GGTGGATCACCTGAGGTCAGGAGT	2	ENST00000590227	422	hsa-miR-5096	ENST00000590227	377	ENST00000552364&479&11	ENST00000575137&2801&11	ENST00000565256&521&11	ENST00000565256&969&11	ENST00000566583&625&11	ENST00000566583&1073&11	ENST00000434411&1423&11	ENST00000434411&1871&11	ENST00000601776&2537&11	ENST00000568695&498&11	ENST00000356949&1067&11	ENST00000483240&307&11	ENST00000393641&195&11	ENST00000413262&195&11	ENST00000424815&195&11	ENST00000393756&195&11	ENST00000479959&3117&11	ENST00000354286&2466&11	ENST00000319863&2850&11	ENST00000566915&2554&11	ENST00000262134&2656&11	ENST00000418464&2412&11	ENST00000559377&700&11	ENST00000397622&2437&11	ENST00000304567&3137&11	ENST00000360566&3137&11	ENST00000473946&1176&11	ENST00000265641&4257&11	ENST00000592700&723&11	ENST00000564265&2152&11	ENST00000372653&256&11	ENST00000586025&2557&11	ENST00000586025&2076&11	ENST00000550412&1469&11	ENST00000448637&2602&11	ENST00000358337&2336&11	ENST00000453471&137&11	ENST00000357428&3298&11	ENST00000370793&3645&11	ENST00000481579&2009&11	ENST00000370794&3466&11	ENST00000398863&3976&11
21	GGATCACGAGGTCAGGAGT	2	ENST00000562760	1006	hsa-miR-5096	ENST00000562760	966	ENST00000379317&1700&11	ENST00000598857&644&11	ENST00000554141&245&10	ENST00000599666&33&11	ENST00000590634&1199&10	ENST00000254908&959&10	ENST00000486832&293&11	ENST00000472677&54&10	ENST00000546957&387&11	ENST00000550608&1157&10	ENST00000550412&1075&10	ENST00000551946&1002&10	ENST00000569108&218&11	ENST00000552795&402&11	ENST00000599386&3611&10	ENST00000592481&1199&10	ENST00000495596&931&11	ENST00000537812&7065&11	ENST00000293217&6820&11	ENST00000419854&5053&11	ENST00000339656&5089&11	ENST00000602149&3547&11	ENST00000288048&1634&11	ENST00000530911&567&11	ENST00000552341&427&11	ENST00000551223&427&11	ENST00000334660&2198&10	ENST00000369464&2843&11	ENST00000256649&2863&11	ENST00000557416&44&11	ENST00000553793&226&11	ENST00000556716&604&11	ENST00000586054&1748&11	ENST00000481509&81&11	ENST00000482487&136&11	ENST00000511001&480&10	ENST00000575282&1884&10	ENST00000467567&1921&11	ENST00000216099&241&11
21	GGATCACGAGGTCAGGAGT	2	ENST00000595787	5312	hsa-miR-5095	ENST00000595787	5350	ENST00000379317&1700&11	ENST00000598857&644&11	ENST00000554141&245&10	ENST00000599666&33&11	ENST00000590634&1199&10	ENST00000254908&959&10	ENST00000486832&293&11	ENST00000472677&54&10	ENST00000546957&387&11	ENST00000550608&1157&10	ENST00000550412&1075&10	ENST00000551946&1002&10	ENST00000569108&218&11	ENST00000552795&402&11	ENST00000599386&3611&10	ENST00000592481&1199&10	ENST00000495596&931&11	ENST00000537812&7065&11	ENST00000293217&6820&11	ENST00000419854&5053&11	ENST00000339656&5089&11	ENST00000602149&3547&11	ENST00000288048&1634&11	ENST00000530911&567&11	ENST00000552341&427&11	ENST00000551223&427&11	ENST00000334660&2198&10	ENST00000369464&2843&11	ENST00000256649&2863&11	ENST00000557416&44&11	ENST00000553793&226&11	ENST00000556716&604&11	ENST00000586054&1748&11	ENST00000481509&81&11	ENST00000482487&136&11	ENST00000511001&480&10	ENST00000575282&1884&10	ENST00000467567&1921&11	ENST00000216099&241&11
21	GGATCACGAGGTCAGGAGT	2	ENST00000338352	1271	hsa-miR-5095	ENST00000338352	1309	ENST00000379317&1700&11	ENST00000598857&644&11	ENST00000554141&245&10	ENST00000599666&33&11	ENST00000590634&1199&10	ENST00000254908&959&10	ENST00000486832&293&11	ENST00000472677&54&10	ENST00000546957&387&11	ENST00000550608&1157&10	ENST00000550412&1075&10	ENST00000551946&1002&10	ENST00000569108&218&11	ENST00000552795&402&11	ENST00000599386&3611&10	ENST00000592481&1199&10	ENST00000495596&931&11	ENST00000537812&7065&11	ENST00000293217&6820&11	ENST00000419854&5053&11	ENST00000339656&5089&11	ENST00000602149&3547&11	ENST00000288048&1634&11	ENST00000530911&567&11	ENST00000552341&427&11	ENST00000551223&427&11	ENST00000334660&2198&10	ENST00000369464&2843&11	ENST00000256649&2863&11	ENST00000557416&44&11	ENST00000553793&226&11	ENST00000556716&604&11	ENST00000586054&1748&11	ENST00000481509&81&11	ENST00000482487&136&11	ENST00000511001&480&10	ENST00000575282&1884&10	ENST00000467567&1921&11	ENST00000216099&241&11
21	GGATCACGAGGTCAGGAGT	2	ENST00000340855	5312	hsa-miR-5095	ENST00000340855	5350	ENST00000379317&1700&11	ENST00000598857&644&11	ENST00000554141&245&10	ENST00000599666&33&11	ENST00000590634&1199&10	ENST00000254908&959&10	ENST00000486832&293&11	ENST00000472677&54&10	ENST00000546957&387&11	ENST00000550608&1157&10	ENST00000550412&1075&10	ENST00000551946&1002&10	ENST00000569108&218&11	ENST00000552795&402&11	ENST00000599386&3611&10	ENST00000592481&1199&10	ENST00000495596&931&11	ENST00000537812&7065&11	ENST00000293217&6820&11	ENST00000419854&5053&11	ENST00000339656&5089&11	ENST00000602149&3547&11	ENST00000288048&1634&11	ENST00000530911&567&11	ENST00000552341&427&11	ENST00000551223&427&11	ENST00000334660&2198&10	ENST00000369464&2843&11	ENST00000256649&2863&11	ENST00000557416&44&11	ENST00000553793&226&11	ENST00000556716&604&11	ENST00000586054&1748&11	ENST00000481509&81&11	ENST00000482487&136&11	ENST00000511001&480&10	ENST00000575282&1884&10	ENST00000467567&1921&11	ENST00000216099&241&11
21	GGATCACGAGGTCAGGAGT	2	ENST00000510711	1229	hsa-miR-5096	ENST00000510711	1189	ENST00000379317&1700&11	ENST00000598857&644&11	ENST00000554141&245&10	ENST00000599666&33&11	ENST00000590634&1199&10	ENST00000254908&959&10	ENST00000486832&293&11	ENST00000472677&54&10	ENST00000546957&387&11	ENST00000550608&1157&10	ENST00000550412&1075&10	ENST00000551946&1002&10	ENST00000569108&218&11	ENST00000552795&402&11	ENST00000599386&3611&10	ENST00000592481&1199&10	ENST00000495596&931&11	ENST00000537812&7065&11	ENST00000293217&6820&11	ENST00000419854&5053&11	ENST00000339656&5089&11	ENST00000602149&3547&11	ENST00000288048&1634&11	ENST00000530911&567&11	ENST00000552341&427&11	ENST00000551223&427&11	ENST00000334660&2198&10	ENST00000369464&2843&11	ENST00000256649&2863&11	ENST00000557416&44&11	ENST00000553793&226&11	ENST00000556716&604&11	ENST00000586054&1748&11	ENST00000481509&81&11	ENST00000482487&136&11	ENST00000511001&480&10	ENST00000575282&1884&10	ENST00000467567&1921&11	ENST00000216099&241&11
21	GGATCACGAGGTCAGGAGT	2	ENST00000486875	659	hsa-miR-5096	ENST00000486875	619	ENST00000379317&1700&11	ENST00000598857&644&11	ENST00000554141&245&10	ENST00000599666&33&11	ENST00000590634&1199&10	ENST00000254908&959&10	ENST00000486832&293&11	ENST00000472677&54&10	ENST00000546957&387&11	ENST00000550608&1157&10	ENST00000550412&1075&10	ENST00000551946&1002&10	ENST00000569108&218&11	ENST00000552795&402&11	ENST00000599386&3611&10	ENST00000592481&1199&10	ENST00000495596&931&11	ENST00000537812&7065&11	ENST00000293217&6820&11	ENST00000419854&5053&11	ENST00000339656&5089&11	ENST00000602149&3547&11	ENST00000288048&1634&11	ENST00000530911&567&11	ENST00000552341&427&11	ENST00000551223&427&11	ENST00000334660&2198&10	ENST00000369464&2843&11	ENST00000256649&2863&11	ENST00000557416&44&11	ENST00000553793&226&11	ENST00000556716&604&11	ENST00000586054&1748&11	ENST00000481509&81&11	ENST00000482487&136&11	ENST00000511001&480&10	ENST00000575282&1884&10	ENST00000467567&1921&11	ENST00000216099&241&11
21	GGATCACGAGGTCAGGAGT	2	ENST00000358661	2505	hsa-miR-5585-3p	ENST00000358661	2394	ENST00000379317&1700&11	ENST00000598857&644&11	ENST00000554141&245&10	ENST00000599666&33&11	ENST00000590634&1199&10	ENST00000254908&959&10	ENST00000486832&293&11	ENST00000472677&54&10	ENST00000546957&387&11	ENST00000550608&1157&10	ENST00000550412&1075&10	ENST00000551946&1002&10	ENST00000569108&218&11	ENST00000552795&402&11	ENST00000599386&3611&10	ENST00000592481&1199&10	ENST00000495596&931&11	ENST00000537812&7065&11	ENST00000293217&6820&11	ENST00000419854&5053&11	ENST00000339656&5089&11	ENST00000602149&3547&11	ENST00000288048&1634&11	ENST00000530911&567&11	ENST00000552341&427&11	ENST00000551223&427&11	ENST00000334660&2198&10	ENST00000369464&2843&11	ENST00000256649&2863&11	ENST00000557416&44&11	ENST00000553793&226&11	ENST00000556716&604&11	ENST00000586054&1748&11	ENST00000481509&81&11	ENST00000482487&136&11	ENST00000511001&480&10	ENST00000575282&1884&10	ENST00000467567&1921&11	ENST00000216099&241&11
21	GGATCACGAGGTCAGGAGT	2	ENST00000354278	3231	hsa-miR-5585-3p	ENST00000354278	3120	ENST00000379317&1700&11	ENST00000598857&644&11	ENST00000554141&245&10	ENST00000599666&33&11	ENST00000590634&1199&10	ENST00000254908&959&10	ENST00000486832&293&11	ENST00000472677&54&10	ENST00000546957&387&11	ENST00000550608&1157&10	ENST00000550412&1075&10	ENST00000551946&1002&10	ENST00000569108&218&11	ENST00000552795&402&11	ENST00000599386&3611&10	ENST00000592481&1199&10	ENST00000495596&931&11	ENST00000537812&7065&11	ENST00000293217&6820&11	ENST00000419854&5053&11	ENST00000339656&5089&11	ENST00000602149&3547&11	ENST00000288048&1634&11	ENST00000530911&567&11	ENST00000552341&427&11	ENST00000551223&427&11	ENST00000334660&2198&10	ENST00000369464&2843&11	ENST00000256649&2863&11	ENST00000557416&44&11	ENST00000553793&226&11	ENST00000556716&604&11	ENST00000586054&1748&11	ENST00000481509&81&11	ENST00000482487&136&11	ENST00000511001&480&10	ENST00000575282&1884&10	ENST00000467567&1921&11	ENST00000216099&241&11
21	GGATCACGAGGTCAGGAGT	2	ENST00000351894	3402	hsa-miR-5585-3p	ENST00000351894	3291	ENST00000379317&1700&11	ENST00000598857&644&11	ENST00000554141&245&10	ENST00000599666&33&11	ENST00000590634&1199&10	ENST00000254908&959&10	ENST00000486832&293&11	ENST00000472677&54&10	ENST00000546957&387&11	ENST00000550608&1157&10	ENST00000550412&1075&10	ENST00000551946&1002&10	ENST00000569108&218&11	ENST00000552795&402&11	ENST00000599386&3611&10	ENST00000592481&1199&10	ENST00000495596&931&11	ENST00000537812&7065&11	ENST00000293217&6820&11	ENST00000419854&5053&11	ENST00000339656&5089&11	ENST00000602149&3547&11	ENST00000288048&1634&11	ENST00000530911&567&11	ENST00000552341&427&11	ENST00000551223&427&11	ENST00000334660&2198&10	ENST00000369464&2843&11	ENST00000256649&2863&11	ENST00000557416&44&11	ENST00000553793&226&11	ENST00000556716&604&11	ENST00000586054&1748&11	ENST00000481509&81&11	ENST00000482487&136&11	ENST00000511001&480&10	ENST00000575282&1884&10	ENST00000467567&1921&11	ENST00000216099&241&11
21	GGATCACGAGGTCAGGAGT	2	ENST00000535162	3567	hsa-miR-5585-3p	ENST00000535162	3456	ENST00000379317&1700&11	ENST00000598857&644&11	ENST00000554141&245&10	ENST00000599666&33&11	ENST00000590634&1199&10	ENST00000254908&959&10	ENST00000486832&293&11	ENST00000472677&54&10	ENST00000546957&387&11	ENST00000550608&1157&10	ENST00000550412&1075&10	ENST00000551946&1002&10	ENST00000569108&218&11	ENST00000552795&402&11	ENST00000599386&3611&10	ENST00000592481&1199&10	ENST00000495596&931&11	ENST00000537812&7065&11	ENST00000293217&6820&11	ENST00000419854&5053&11	ENST00000339656&5089&11	ENST00000602149&3547&11	ENST00000288048&1634&11	ENST00000530911&567&11	ENST00000552341&427&11	ENST00000551223&427&11	ENST00000334660&2198&10	ENST00000369464&2843&11	ENST00000256649&2863&11	ENST00000557416&44&11	ENST00000553793&226&11	ENST00000556716&604&11	ENST00000586054&1748&11	ENST00000481509&81&11	ENST00000482487&136&11	ENST00000511001&480&10	ENST00000575282&1884&10	ENST00000467567&1921&11	ENST00000216099&241&11
21	GGATCACGAGGTCAGGAGT	2	ENST00000324134	3687	hsa-miR-5585-3p	ENST00000324134	3576	ENST00000379317&1700&11	ENST00000598857&644&11	ENST00000554141&245&10	ENST00000599666&33&11	ENST00000590634&1199&10	ENST00000254908&959&10	ENST00000486832&293&11	ENST00000472677&54&10	ENST00000546957&387&11	ENST00000550608&1157&10	ENST00000550412&1075&10	ENST00000551946&1002&10	ENST00000569108&218&11	ENST00000552795&402&11	ENST00000599386&3611&10	ENST00000592481&1199&10	ENST00000495596&931&11	ENST00000537812&7065&11	ENST00000293217&6820&11	ENST00000419854&5053&11	ENST00000339656&5089&11	ENST00000602149&3547&11	ENST00000288048&1634&11	ENST00000530911&567&11	ENST00000552341&427&11	ENST00000551223&427&11	ENST00000334660&2198&10	ENST00000369464&2843&11	ENST00000256649&2863&11	ENST00000557416&44&11	ENST00000553793&226&11	ENST00000556716&604&11	ENST00000586054&1748&11	ENST00000481509&81&11	ENST00000482487&136&11	ENST00000511001&480&10	ENST00000575282&1884&10	ENST00000467567&1921&11	ENST00000216099&241&11
22	GGGACTACAGGCACATGC	2	ENST00000455424	653	hsa-miR-1273g-3p	ENST00000455424	734	ENST00000323571&3699&10	ENST00000330263&1343&10	ENST00000512439&3841&10	ENST00000484949&375&10	ENST00000282026&1185&10	ENST00000368008&1621&1731	ENST00000339267&3071&10	ENST00000396594&3277&10	ENST00000377902&3293&10	ENST00000379303&1922&10	ENST00000512570&428&10	ENST00000491209&2092&10	ENST00000314529&3175&10
22	GGGACTACAGGCACATGC	2	ENST00000462519	2298	hsa-miR-1273g-3p	ENST00000462519	2379	ENST00000323571&3699&10	ENST00000330263&1343&10	ENST00000512439&3841&10	ENST00000484949&375&10	ENST00000282026&1185&10	ENST00000368008&1621&1731	ENST00000339267&3071&10	ENST00000396594&3277&10	ENST00000377902&3293&10	ENST00000379303&1922&10	ENST00000512570&428&10	ENST00000491209&2092&10	ENST00000314529&3175&10
22	GGGACTACAGGCACATGC	2	ENST00000600299	572	hsa-miR-1273g-3p	ENST00000600299	653	ENST00000323571&3699&10	ENST00000330263&1343&10	ENST00000512439&3841&10	ENST00000484949&375&10	ENST00000282026&1185&10	ENST00000368008&1621&1731	ENST00000339267&3071&10	ENST00000396594&3277&10	ENST00000377902&3293&10	ENST00000379303&1922&10	ENST00000512570&428&10	ENST00000491209&2092&10	ENST00000314529&3175&10
23	TGTTGGTCAGGCTGGTCT	2	ENST00000585465	1694	hsa-miR-1273a	ENST00000585465	1859	ENST00000511755&756&10	ENST00000377597&878&10	ENST00000560128&1603&25	ENST00000584831&2416&12	ENST00000597346&79583&12	ENST00000562760&1011&10	ENST00000596632&55&13	ENST00000600090&168&10	ENST00000504658&770&13	ENST00000581901&2088&25	ENST00000567327&2536&12	ENST00000413451&501&13	ENST00000568911&4767&10	ENST00000460528&1680&10	ENST00000551597&290&10	ENST00000506387&651&12	ENST00000393978&631&12	ENST00000560958&1463&10	ENST00000446101&3296&10	ENST00000381680&1612&12	ENST00000366223&2154&10	ENST00000580574&704&13	ENST00000354451&1345&12	ENST00000571914&474&10	ENST00000595236&1900&10	ENST00000573424&3192&10	ENST00000343526&6940&13	ENST00000491289&4065&12	ENST00000491289&4201&12	ENST00000323303&3542&12	ENST00000233892&3341&12	ENST00000382349&5144&12	ENST00000572919&4555&10	ENST00000547066&355&10	ENST00000547581&554&10	ENST00000394434&4543&10	ENST00000311317&2721&13	ENST00000460168&2037&10	ENST00000427635&1816&10	ENST00000274242&3077&10	ENST00000334231&5389&10	ENST00000408978&5505&10
23	TGTTGGTCAGGCTGGTCT	2	ENST00000590071	4399	hsa-miR-1273c	ENST00000590071	4265	ENST00000511755&756&10	ENST00000377597&878&10	ENST00000560128&1603&25	ENST00000584831&2416&12	ENST00000597346&79583&12	ENST00000562760&1011&10	ENST00000596632&55&13	ENST00000600090&168&10	ENST00000504658&770&13	ENST00000581901&2088&25	ENST00000567327&2536&12	ENST00000413451&501&13	ENST00000568911&4767&10	ENST00000460528&1680&10	ENST00000551597&290&10	ENST00000506387&651&12	ENST00000393978&631&12	ENST00000560958&1463&10	ENST00000446101&3296&10	ENST00000381680&1612&12	ENST00000366223&2154&10	ENST00000580574&704&13	ENST00000354451&1345&12	ENST00000571914&474&10	ENST00000595236&1900&10	ENST00000573424&3192&10	ENST00000343526&6940&13	ENST00000491289&4065&12	ENST00000491289&4201&12	ENST00000323303&3542&12	ENST00000233892&3341&12	ENST00000382349&5144&12	ENST00000572919&4555&10	ENST00000547066&355&10	ENST00000547581&554&10	ENST00000394434&4543&10	ENST00000311317&2721&13	ENST00000460168&2037&10	ENST00000427635&1816&10	ENST00000274242&3077&10	ENST00000334231&5389&10	ENST00000408978&5505&10
23	TGTTGGTCAGGCTGGTCT	2	ENST00000231498	7287	hsa-miR-1273e	ENST00000231498	7399	ENST00000511755&756&10	ENST00000377597&878&10	ENST00000560128&1603&25	ENST00000584831&2416&12	ENST00000597346&79583&12	ENST00000562760&1011&10	ENST00000596632&55&13	ENST00000600090&168&10	ENST00000504658&770&13	ENST00000581901&2088&25	ENST00000567327&2536&12	ENST00000413451&501&13	ENST00000568911&4767&10	ENST00000460528&1680&10	ENST00000551597&290&10	ENST00000506387&651&12	ENST00000393978&631&12	ENST00000560958&1463&10	ENST00000446101&3296&10	ENST00000381680&1612&12	ENST00000366223&2154&10	ENST00000580574&704&13	ENST00000354451&1345&12	ENST00000571914&474&10	ENST00000595236&1900&10	ENST00000573424&3192&10	ENST00000343526&6940&13	ENST00000491289&4065&12	ENST00000491289&4201&12	ENST00000323303&3542&12	ENST00000233892&3341&12	ENST00000382349&5144&12	ENST00000572919&4555&10	ENST00000547066&355&10	ENST00000547581&554&10	ENST00000394434&4543&10	ENST00000311317&2721&13	ENST00000460168&2037&10	ENST00000427635&1816&10	ENST00000274242&3077&10	ENST00000334231&5389&10	ENST00000408978&5505&10
23	TGTTGGTCAGGCTGGTCT	2	ENST00000568109	223	hsa-miR-1273e	ENST00000568109	328	ENST00000511755&756&10	ENST00000377597&878&10	ENST00000560128&1603&25	ENST00000584831&2416&12	ENST00000597346&79583&12	ENST00000562760&1011&10	ENST00000596632&55&13	ENST00000600090&168&10	ENST00000504658&770&13	ENST00000581901&2088&25	ENST00000567327&2536&12	ENST00000413451&501&13	ENST00000568911&4767&10	ENST00000460528&1680&10	ENST00000551597&290&10	ENST00000506387&651&12	ENST00000393978&631&12	ENST00000560958&1463&10	ENST00000446101&3296&10	ENST00000381680&1612&12	ENST00000366223&2154&10	ENST00000580574&704&13	ENST00000354451&1345&12	ENST00000571914&474&10	ENST00000595236&1900&10	ENST00000573424&3192&10	ENST00000343526&6940&13	ENST00000491289&4065&12	ENST00000491289&4201&12	ENST00000323303&3542&12	ENST00000233892&3341&12	ENST00000382349&5144&12	ENST00000572919&4555&10	ENST00000547066&355&10	ENST00000547581&554&10	ENST00000394434&4543&10	ENST00000311317&2721&13	ENST00000460168&2037&10	ENST00000427635&1816&10	ENST00000274242&3077&10	ENST00000334231&5389&10	ENST00000408978&5505&10
23	TGTTGGTCAGGCTGGTCT	2	ENST00000488801	313	hsa-miR-1273e	ENST00000488801	417	ENST00000511755&756&10	ENST00000377597&878&10	ENST00000560128&1603&25	ENST00000584831&2416&12	ENST00000597346&79583&12	ENST00000562760&1011&10	ENST00000596632&55&13	ENST00000600090&168&10	ENST00000504658&770&13	ENST00000581901&2088&25	ENST00000567327&2536&12	ENST00000413451&501&13	ENST00000568911&4767&10	ENST00000460528&1680&10	ENST00000551597&290&10	ENST00000506387&651&12	ENST00000393978&631&12	ENST00000560958&1463&10	ENST00000446101&3296&10	ENST00000381680&1612&12	ENST00000366223&2154&10	ENST00000580574&704&13	ENST00000354451&1345&12	ENST00000571914&474&10	ENST00000595236&1900&10	ENST00000573424&3192&10	ENST00000343526&6940&13	ENST00000491289&4065&12	ENST00000491289&4201&12	ENST00000323303&3542&12	ENST00000233892&3341&12	ENST00000382349&5144&12	ENST00000572919&4555&10	ENST00000547066&355&10	ENST00000547581&554&10	ENST00000394434&4543&10	ENST00000311317&2721&13	ENST00000460168&2037&10	ENST00000427635&1816&10	ENST00000274242&3077&10	ENST00000334231&5389&10	ENST00000408978&5505&10
23	TGTTGGTCAGGCTGGTCT	2	ENST00000566036	63	hsa-miR-1273f	ENST00000566036	184	ENST00000511755&756&10	ENST00000377597&878&10	ENST00000560128&1603&25	ENST00000584831&2416&12	ENST00000597346&79583&12	ENST00000562760&1011&10	ENST00000596632&55&13	ENST00000600090&168&10	ENST00000504658&770&13	ENST00000581901&2088&25	ENST00000567327&2536&12	ENST00000413451&501&13	ENST00000568911&4767&10	ENST00000460528&1680&10	ENST00000551597&290&10	ENST00000506387&651&12	ENST00000393978&631&12	ENST00000560958&1463&10	ENST00000446101&3296&10	ENST00000381680&1612&12	ENST00000366223&2154&10	ENST00000580574&704&13	ENST00000354451&1345&12	ENST00000571914&474&10	ENST00000595236&1900&10	ENST00000573424&3192&10	ENST00000343526&6940&13	ENST00000491289&4065&12	ENST00000491289&4201&12	ENST00000323303&3542&12	ENST00000233892&3341&12	ENST00000382349&5144&12	ENST00000572919&4555&10	ENST00000547066&355&10	ENST00000547581&554&10	ENST00000394434&4543&10	ENST00000311317&2721&13	ENST00000460168&2037&10	ENST00000427635&1816&10	ENST00000274242&3077&10	ENST00000334231&5389&10	ENST00000408978&5505&10
23	TGTTGGTCAGGCTGGTCT	2	ENST00000432854	3529	hsa-miR-1273f	ENST00000432854	3642	ENST00000511755&756&10	ENST00000377597&878&10	ENST00000560128&1603&25	ENST00000584831&2416&12	ENST00000597346&79583&12	ENST00000562760&1011&10	ENST00000596632&55&13	ENST00000600090&168&10	ENST00000504658&770&13	ENST00000581901&2088&25	ENST00000567327&2536&12	ENST00000413451&501&13	ENST00000568911&4767&10	ENST00000460528&1680&10	ENST00000551597&290&10	ENST00000506387&651&12	ENST00000393978&631&12	ENST00000560958&1463&10	ENST00000446101&3296&10	ENST00000381680&1612&12	ENST00000366223&2154&10	ENST00000580574&704&13	ENST00000354451&1345&12	ENST00000571914&474&10	ENST00000595236&1900&10	ENST00000573424&3192&10	ENST00000343526&6940&13	ENST00000491289&4065&12	ENST00000491289&4201&12	ENST00000323303&3542&12	ENST00000233892&3341&12	ENST00000382349&5144&12	ENST00000572919&4555&10	ENST00000547066&355&10	ENST00000547581&554&10	ENST00000394434&4543&10	ENST00000311317&2721&13	ENST00000460168&2037&10	ENST00000427635&1816&10	ENST00000274242&3077&10	ENST00000334231&5389&10	ENST00000408978&5505&10
23	TGTTGGTCAGGCTGGTCT	2	ENST00000406297	3268	hsa-miR-1273f	ENST00000406297	3386	ENST00000511755&756&10	ENST00000377597&878&10	ENST00000560128&1603&25	ENST00000584831&2416&12	ENST00000597346&79583&12	ENST00000562760&1011&10	ENST00000596632&55&13	ENST00000600090&168&10	ENST00000504658&770&13	ENST00000581901&2088&25	ENST00000567327&2536&12	ENST00000413451&501&13	ENST00000568911&4767&10	ENST00000460528&1680&10	ENST00000551597&290&10	ENST00000506387&651&12	ENST00000393978&631&12	ENST00000560958&1463&10	ENST00000446101&3296&10	ENST00000381680&1612&12	ENST00000366223&2154&10	ENST00000580574&704&13	ENST00000354451&1345&12	ENST00000571914&474&10	ENST00000595236&1900&10	ENST00000573424&3192&10	ENST00000343526&6940&13	ENST00000491289&4065&12	ENST00000491289&4201&12	ENST00000323303&3542&12	ENST00000233892&3341&12	ENST00000382349&5144&12	ENST00000572919&4555&10	ENST00000547066&355&10	ENST00000547581&554&10	ENST00000394434&4543&10	ENST00000311317&2721&13	ENST00000460168&2037&10	ENST00000427635&1816&10	ENST00000274242&3077&10	ENST00000334231&5389&10	ENST00000408978&5505&10
23	TGTTGGTCAGGCTGGTCT	2	ENST00000525088	1550	hsa-miR-1273g-3p	ENST00000525088	1707	ENST00000511755&756&10	ENST00000377597&878&10	ENST00000560128&1603&25	ENST00000584831&2416&12	ENST00000597346&79583&12	ENST00000562760&1011&10	ENST00000596632&55&13	ENST00000600090&168&10	ENST00000504658&770&13	ENST00000581901&2088&25	ENST00000567327&2536&12	ENST00000413451&501&13	ENST00000568911&4767&10	ENST00000460528&1680&10	ENST00000551597&290&10	ENST00000506387&651&12	ENST00000393978&631&12	ENST00000560958&1463&10	ENST00000446101&3296&10	ENST00000381680&1612&12	ENST00000366223&2154&10	ENST00000580574&704&13	ENST00000354451&1345&12	ENST00000571914&474&10	ENST00000595236&1900&10	ENST00000573424&3192&10	ENST00000343526&6940&13	ENST00000491289&4065&12	ENST00000491289&4201&12	ENST00000323303&3542&12	ENST00000233892&3341&12	ENST00000382349&5144&12	ENST00000572919&4555&10	ENST00000547066&355&10	ENST00000547581&554&10	ENST00000394434&4543&10	ENST00000311317&2721&13	ENST00000460168&2037&10	ENST00000427635&1816&10	ENST00000274242&3077&10	ENST00000334231&5389&10	ENST00000408978&5505&10
23	TGTTGGTCAGGCTGGTCT	2	ENST00000525088	1550	hsa-miR-1273g-3p	ENST00000525088	1844	ENST00000511755&756&10	ENST00000377597&878&10	ENST00000560128&1603&25	ENST00000584831&2416&12	ENST00000597346&79583&12	ENST00000562760&1011&10	ENST00000596632&55&13	ENST00000600090&168&10	ENST00000504658&770&13	ENST00000581901&2088&25	ENST00000567327&2536&12	ENST00000413451&501&13	ENST00000568911&4767&10	ENST00000460528&1680&10	ENST00000551597&290&10	ENST00000506387&651&12	ENST00000393978&631&12	ENST00000560958&1463&10	ENST00000446101&3296&10	ENST00000381680&1612&12	ENST00000366223&2154&10	ENST00000580574&704&13	ENST00000354451&1345&12	ENST00000571914&474&10	ENST00000595236&1900&10	ENST00000573424&3192&10	ENST00000343526&6940&13	ENST00000491289&4065&12	ENST00000491289&4201&12	ENST00000323303&3542&12	ENST00000233892&3341&12	ENST00000382349&5144&12	ENST00000572919&4555&10	ENST00000547066&355&10	ENST00000547581&554&10	ENST00000394434&4543&10	ENST00000311317&2721&13	ENST00000460168&2037&10	ENST00000427635&1816&10	ENST00000274242&3077&10	ENST00000334231&5389&10	ENST00000408978&5505&10
24	CAAAACCGCAATTACTTTTGC	3	ENST00000409819	1829	hsa-miR-548ap-3p	ENST00000409819	1855	ENST00000583448&1735&13	ENST00000374258&1735&13	ENST00000335083&1735&13
25	TAGCTGGGATTACAGGTA	2	ENST00000315901	157	hsa-miR-1273g-3p	ENST00000315901	233	ENST00000549592&291&17	ENST00000492956&2878&17	ENST00000563454&1936&17	ENST00000323443&2176&17	ENST00000397130&1911&17	ENST00000546474&9162&17	ENST00000409719&2180&17	ENST00000403856&6788&17	ENST00000562621&1280&17	ENST00000304385&8706&17	ENST00000590689&707&17	ENST00000284268&3989&17	ENST00000378962&1747&17	ENST00000558207&3475&17	ENST00000569831&349&17	ENST00000601483&343&17	ENST00000566841&698&17	ENST00000416930&297&17	ENST00000451208&1188&17	ENST00000508969&1363&17	ENST00000564447&1039&17	ENST00000573063&2570&17	ENST00000505295&791&17	ENST00000501927&703&17	ENST00000554532&249&17	ENST00000570230&2061&17	ENST00000401453&2538&17	ENST00000523153&2840&17
26	TTGGGAGGCTGAGGCAGGAGAA	2	ENST00000369981	7984	hsa-miR-5095	ENST00000369981	8137	ENST00000597357&115&11	ENST00000366278&1635&11	ENST00000596483&227&40	ENST00000493181&741&11
26	TTGGGAGGCTGAGGCAGGAGAA	2	ENST00000574773	2509	hsa-miR-5095	ENST00000574773	2663	ENST00000597357&115&11	ENST00000366278&1635&11	ENST00000596483&227&40	ENST00000493181&741&11
26	TTGGGAGGCTGAGGCAGGAGAA	2	ENST00000473592	1606	hsa-miR-5096	ENST00000473592	1681	ENST00000597357&115&11	ENST00000366278&1635&11	ENST00000596483&227&40	ENST00000493181&741&11
26	TTGGGAGGCTGAGGCAGGAGAA	2	ENST00000409982	830	hsa-miR-5096	ENST00000409982	904	ENST00000597357&115&11	ENST00000366278&1635&11	ENST00000596483&227&40	ENST00000493181&741&11
26	TTGGGAGGCTGAGGCAGGAGAA	2	ENST00000378845	1389	hsa-miR-5096	ENST00000378845	1462	ENST00000597357&115&11	ENST00000366278&1635&11	ENST00000596483&227&40	ENST00000493181&741&11
26	TTGGGAGGCTGAGGCAGGAGAA	2	ENST00000590227	422	hsa-miR-5096	ENST00000590227	483	ENST00000597357&115&11	ENST00000366278&1635&11	ENST00000596483&227&40	ENST00000493181&741&11
26	TTGGGAGGCTGAGGCAGGAGAA	2	ENST00000586372	3494	hsa-miR-5585-3p	ENST00000586372	3499	ENST00000597357&115&11	ENST00000366278&1635&11	ENST00000596483&227&40	ENST00000493181&741&11
27	CTCACTGCAACCTCCATC	3	ENST00000560302	2601	hsa-miR-1273a	ENST00000560302	2638	ENST00000492952&499&10	ENST00000357214&3397&69
27	CTCACTGCAACCTCCATC	3	ENST00000566036	63	hsa-miR-1273f	ENST00000566036	51	ENST00000492952&499&10	ENST00000357214&3397&69
27	CTCACTGCAACCTCCATC	3	ENST00000455424	653	hsa-miR-1273g-3p	ENST00000455424	672	ENST00000492952&499&10	ENST00000357214&3397&69
27	CTCACTGCAACCTCCATC	3	ENST00000558027	350	hsa-miR-1273f	ENST00000558027	253	ENST00000492952&499&10	ENST00000357214&3397&69
27	CTCACTGCAACCTCCATC	3	ENST00000558027	350	hsa-miR-1273f	ENST00000558027	338	ENST00000492952&499&10	ENST00000357214&3397&69
27	CTCACTGCAACCTCCATC	3	ENST00000311936	3105	hsa-miR-1273f	ENST00000311936	3093	ENST00000492952&499&10	ENST00000357214&3397&69
27	CTCACTGCAACCTCCATC	3	ENST00000586025	2354	hsa-miR-1273g-3p	ENST00000586025	2373	ENST00000492952&499&10	ENST00000357214&3397&69
27	CTCACTGCAACCTCCATC	3	ENST00000321764	2749	hsa-miR-1273f	ENST00000321764	2737	ENST00000492952&499&10	ENST00000357214&3397&69
27	CTCACTGCAACCTCCATC	3	ENST00000357137	5385	hsa-miR-1273f	ENST00000357137	5373	ENST00000492952&499&10	ENST00000357214&3397&69
27	CTCACTGCAACCTCCATC	3	ENST00000432854	3529	hsa-miR-1273f	ENST00000432854	3517	ENST00000492952&499&10	ENST00000357214&3397&69
27	CTCACTGCAACCTCCATC	3	ENST00000377038	4941	hsa-miR-1273f	ENST00000377038	4929	ENST00000492952&499&10	ENST00000357214&3397&69
27	CTCACTGCAACCTCCATC	3	ENST00000462923	383	hsa-miR-1273f	ENST00000462923	371	ENST00000492952&499&10	ENST00000357214&3397&69
27	CTCACTGCAACCTCCATC	3	ENST00000406297	3268	hsa-miR-1273f	ENST00000406297	3256	ENST00000492952&499&10	ENST00000357214&3397&69
27	CTCACTGCAACCTCCATC	3	ENST00000600625	1956	hsa-miR-1273f	ENST00000600625	1944	ENST00000492952&499&10	ENST00000357214&3397&69
27	CTCACTGCAACCTCCATC	3	ENST00000324894	2030	hsa-miR-1273f	ENST00000324894	2018	ENST00000492952&499&10	ENST00000357214&3397&69
27	CTCACTGCAACCTCCATC	3	ENST00000598038	2373	hsa-miR-1273f	ENST00000598038	2361	ENST00000492952&499&10	ENST00000357214&3397&69
27	CTCACTGCAACCTCCATC	3	ENST00000478820	1035	hsa-miR-1273f	ENST00000478820	1023	ENST00000492952&499&10	ENST00000357214&3397&69
27	CTCACTGCAACCTCCATC	3	ENST00000480612	266	hsa-miR-1273f	ENST00000480612	254	ENST00000492952&499&10	ENST00000357214&3397&69
28	AGCTGAGACTACAGGCAC	4	ENST00000340740	2403	hsa-miR-1285-3p	ENST00000340740	2328	ENST00000426959&4976&17	ENST00000373930&4977&17	ENST00000377753&1466&17	ENST00000297994&1717&17	ENST00000377754&1608&17	ENST00000404699&5623&17	ENST00000543397&1139&17
28	AGCTGAGACTACAGGCAC	4	ENST00000396789	327	hsa-miR-1273g-3p	ENST00000396789	404	ENST00000426959&4976&17	ENST00000373930&4977&17	ENST00000377753&1466&17	ENST00000297994&1717&17	ENST00000377754&1608&17	ENST00000404699&5623&17	ENST00000543397&1139&17
29	CTGACCAACATGGAGAAA	2	ENST00000317872	2290	hsa-miR-5095	ENST00000317872	2360	ENST00000366326&166&10	ENST00000600045&220&10	ENST00000543450&2429&10	ENST00000381477&1281&10	ENST00000550383&2858&10	ENST00000602050&38&10
29	CTGACCAACATGGAGAAA	2	ENST00000355407	1634	hsa-miR-5095	ENST00000355407	1704	ENST00000366326&166&10	ENST00000600045&220&10	ENST00000543450&2429&10	ENST00000381477&1281&10	ENST00000550383&2858&10	ENST00000602050&38&10
29	CTGACCAACATGGAGAAA	2	ENST00000491289	4196	hsa-miR-5096	ENST00000491289	4050	ENST00000366326&166&10	ENST00000600045&220&10	ENST00000543450&2429&10	ENST00000381477&1281&10	ENST00000550383&2858&10	ENST00000602050&38&10
29	CTGACCAACATGGAGAAA	2	ENST00000491289	4196	hsa-miR-5096	ENST00000491289	4186	ENST00000366326&166&10	ENST00000600045&220&10	ENST00000543450&2429&10	ENST00000381477&1281&10	ENST00000550383&2858&10	ENST00000602050&38&10
29	CTGACCAACATGGAGAAA	2	ENST00000229022	3559	hsa-miR-5095	ENST00000229022	3629	ENST00000366326&166&10	ENST00000600045&220&10	ENST00000543450&2429&10	ENST00000381477&1281&10	ENST00000550383&2858&10	ENST00000602050&38&10
29	CTGACCAACATGGAGAAA	2	ENST00000395324	3546	hsa-miR-5095	ENST00000395324	3616	ENST00000366326&166&10	ENST00000600045&220&10	ENST00000543450&2429&10	ENST00000381477&1281&10	ENST00000550383&2858&10	ENST00000602050&38&10
29	CTGACCAACATGGAGAAA	2	ENST00000600410	2247	hsa-miR-5096	ENST00000600410	2237	ENST00000366326&166&10	ENST00000600045&220&10	ENST00000543450&2429&10	ENST00000381477&1281&10	ENST00000550383&2858&10	ENST00000602050&38&10
30	GAGCAAGACTCCATCTCAAA	3	ENST00000528973	3137	hsa-miR-5585-3p	ENST00000528973	3234	ENST00000536678&682&12	ENST00000598613&53&12	ENST00000523129&1439&12	ENST00000416209&1439&12	ENST00000520658&33&12	ENST00000514201&337&10	ENST00000380387&1551&12	ENST00000432401&1254&12	ENST00000566915&2341&12	ENST00000262134&2443&12	ENST00000595247&48&12	ENST00000561512&794&12	ENST00000502726&2489&12	ENST00000596701&1743&10	ENST00000380821&4810&12	ENST00000447393&4725&12	ENST00000337273&9454&10	ENST00000520907&1547&12	ENST00000296318&6135&12	ENST00000329468&6582&12	ENST00000433570&2419&10	ENST00000367612&4845&12	ENST00000415083&2966&12
30	GAGCAAGACTCCATCTCAAA	3	ENST00000567244	111	hsa-miR-5585-3p	ENST00000567244	209	ENST00000536678&682&12	ENST00000598613&53&12	ENST00000523129&1439&12	ENST00000416209&1439&12	ENST00000520658&33&12	ENST00000514201&337&10	ENST00000380387&1551&12	ENST00000432401&1254&12	ENST00000566915&2341&12	ENST00000262134&2443&12	ENST00000595247&48&12	ENST00000561512&794&12	ENST00000502726&2489&12	ENST00000596701&1743&10	ENST00000380821&4810&12	ENST00000447393&4725&12	ENST00000337273&9454&10	ENST00000520907&1547&12	ENST00000296318&6135&12	ENST00000329468&6582&12	ENST00000433570&2419&10	ENST00000367612&4845&12	ENST00000415083&2966&12
31	AGGCGGAGGTTGCAGTGAGCCAAGAT	2	ENST00000595787	5312	hsa-miR-5095	ENST00000595787	5500	ENST00000394856&2422&11	ENST00000514353&2494&11
31	AGGCGGAGGTTGCAGTGAGCCAAGAT	2	ENST00000340855	5312	hsa-miR-5095	ENST00000340855	5500	ENST00000394856&2422&11	ENST00000514353&2494&11
31	AGGCGGAGGTTGCAGTGAGCCAAGAT	2	ENST00000568911	4762	hsa-miR-5096	ENST00000568911	4873	ENST00000394856&2422&11	ENST00000514353&2494&11
31	AGGCGGAGGTTGCAGTGAGCCAAGAT	2	ENST00000563777	3249	hsa-miR-5585-3p	ENST00000563777	3291	ENST00000394856&2422&11	ENST00000514353&2494&11
32	AGGAGAATGGCGTGAACCC	2	ENST00000421870	281	hsa-miR-5095	ENST00000421870	448	ENST00000595145&978&10	ENST00000394240&104&10	ENST00000533886&45&10	ENST00000510610&409&10	ENST00000568797&799&10	ENST00000524425&768&10	ENST00000596909&240&10	ENST00000371487&167&10	ENST00000552113&109&10	ENST00000546646&109&10	ENST00000366232&97&10	ENST00000549737&131&10	ENST00000443948&726&10	ENST00000450281&433&10	ENST00000411857&4729&10	ENST00000449697&490&10	ENST00000468695&1123&10	ENST00000504242&177&10	ENST00000502286&197&10	ENST00000439578&142&10	ENST00000563294&233&10	ENST00000564663&340&10	ENST00000543006&10406&10	ENST00000543006&7698&10	ENST00000312675&10463&10	ENST00000312675&7755&10	ENST00000570867&532&10	ENST00000425673&6248&12	ENST00000530275&4976&10	ENST00000568559&3238&10	ENST00000357613&3658&10	ENST00000373014&1716&10	ENST00000497719&616&10	ENST00000497434&556&10	ENST00000399280&826&10	ENST00000399277&965&10	ENST00000490395&707&10	ENST00000519466&319&10	ENST00000445217&1407&10	ENST00000588578&2290&10	ENST00000583206&180&10	ENST00000547277&109&10
32	AGGAGAATGGCGTGAACCC	2	ENST00000501818	2423	hsa-miR-5095	ENST00000501818	2592	ENST00000595145&978&10	ENST00000394240&104&10	ENST00000533886&45&10	ENST00000510610&409&10	ENST00000568797&799&10	ENST00000524425&768&10	ENST00000596909&240&10	ENST00000371487&167&10	ENST00000552113&109&10	ENST00000546646&109&10	ENST00000366232&97&10	ENST00000549737&131&10	ENST00000443948&726&10	ENST00000450281&433&10	ENST00000411857&4729&10	ENST00000449697&490&10	ENST00000468695&1123&10	ENST00000504242&177&10	ENST00000502286&197&10	ENST00000439578&142&10	ENST00000563294&233&10	ENST00000564663&340&10	ENST00000543006&10406&10	ENST00000543006&7698&10	ENST00000312675&10463&10	ENST00000312675&7755&10	ENST00000570867&532&10	ENST00000425673&6248&12	ENST00000530275&4976&10	ENST00000568559&3238&10	ENST00000357613&3658&10	ENST00000373014&1716&10	ENST00000497719&616&10	ENST00000497434&556&10	ENST00000399280&826&10	ENST00000399277&965&10	ENST00000490395&707&10	ENST00000519466&319&10	ENST00000445217&1407&10	ENST00000588578&2290&10	ENST00000583206&180&10	ENST00000547277&109&10
32	AGGAGAATGGCGTGAACCC	2	ENST00000586798	3069	hsa-miR-5095	ENST00000586798	3237	ENST00000595145&978&10	ENST00000394240&104&10	ENST00000533886&45&10	ENST00000510610&409&10	ENST00000568797&799&10	ENST00000524425&768&10	ENST00000596909&240&10	ENST00000371487&167&10	ENST00000552113&109&10	ENST00000546646&109&10	ENST00000366232&97&10	ENST00000549737&131&10	ENST00000443948&726&10	ENST00000450281&433&10	ENST00000411857&4729&10	ENST00000449697&490&10	ENST00000468695&1123&10	ENST00000504242&177&10	ENST00000502286&197&10	ENST00000439578&142&10	ENST00000563294&233&10	ENST00000564663&340&10	ENST00000543006&10406&10	ENST00000543006&7698&10	ENST00000312675&10463&10	ENST00000312675&7755&10	ENST00000570867&532&10	ENST00000425673&6248&12	ENST00000530275&4976&10	ENST00000568559&3238&10	ENST00000357613&3658&10	ENST00000373014&1716&10	ENST00000497719&616&10	ENST00000497434&556&10	ENST00000399280&826&10	ENST00000399277&965&10	ENST00000490395&707&10	ENST00000519466&319&10	ENST00000445217&1407&10	ENST00000588578&2290&10	ENST00000583206&180&10	ENST00000547277&109&10
32	AGGAGAATGGCGTGAACCC	2	ENST00000441363	1955	hsa-miR-5095	ENST00000441363	2123	ENST00000595145&978&10	ENST00000394240&104&10	ENST00000533886&45&10	ENST00000510610&409&10	ENST00000568797&799&10	ENST00000524425&768&10	ENST00000596909&240&10	ENST00000371487&167&10	ENST00000552113&109&10	ENST00000546646&109&10	ENST00000366232&97&10	ENST00000549737&131&10	ENST00000443948&726&10	ENST00000450281&433&10	ENST00000411857&4729&10	ENST00000449697&490&10	ENST00000468695&1123&10	ENST00000504242&177&10	ENST00000502286&197&10	ENST00000439578&142&10	ENST00000563294&233&10	ENST00000564663&340&10	ENST00000543006&10406&10	ENST00000543006&7698&10	ENST00000312675&10463&10	ENST00000312675&7755&10	ENST00000570867&532&10	ENST00000425673&6248&12	ENST00000530275&4976&10	ENST00000568559&3238&10	ENST00000357613&3658&10	ENST00000373014&1716&10	ENST00000497719&616&10	ENST00000497434&556&10	ENST00000399280&826&10	ENST00000399277&965&10	ENST00000490395&707&10	ENST00000519466&319&10	ENST00000445217&1407&10	ENST00000588578&2290&10	ENST00000583206&180&10	ENST00000547277&109&10
32	AGGAGAATGGCGTGAACCC	2	ENST00000506037	277	hsa-miR-5095	ENST00000506037	445	ENST00000595145&978&10	ENST00000394240&104&10	ENST00000533886&45&10	ENST00000510610&409&10	ENST00000568797&799&10	ENST00000524425&768&10	ENST00000596909&240&10	ENST00000371487&167&10	ENST00000552113&109&10	ENST00000546646&109&10	ENST00000366232&97&10	ENST00000549737&131&10	ENST00000443948&726&10	ENST00000450281&433&10	ENST00000411857&4729&10	ENST00000449697&490&10	ENST00000468695&1123&10	ENST00000504242&177&10	ENST00000502286&197&10	ENST00000439578&142&10	ENST00000563294&233&10	ENST00000564663&340&10	ENST00000543006&10406&10	ENST00000543006&7698&10	ENST00000312675&10463&10	ENST00000312675&7755&10	ENST00000570867&532&10	ENST00000425673&6248&12	ENST00000530275&4976&10	ENST00000568559&3238&10	ENST00000357613&3658&10	ENST00000373014&1716&10	ENST00000497719&616&10	ENST00000497434&556&10	ENST00000399280&826&10	ENST00000399277&965&10	ENST00000490395&707&10	ENST00000519466&319&10	ENST00000445217&1407&10	ENST00000588578&2290&10	ENST00000583206&180&10	ENST00000547277&109&10
32	AGGAGAATGGCGTGAACCC	2	ENST00000576928	2428	hsa-miR-5095	ENST00000576928	2597	ENST00000595145&978&10	ENST00000394240&104&10	ENST00000533886&45&10	ENST00000510610&409&10	ENST00000568797&799&10	ENST00000524425&768&10	ENST00000596909&240&10	ENST00000371487&167&10	ENST00000552113&109&10	ENST00000546646&109&10	ENST00000366232&97&10	ENST00000549737&131&10	ENST00000443948&726&10	ENST00000450281&433&10	ENST00000411857&4729&10	ENST00000449697&490&10	ENST00000468695&1123&10	ENST00000504242&177&10	ENST00000502286&197&10	ENST00000439578&142&10	ENST00000563294&233&10	ENST00000564663&340&10	ENST00000543006&10406&10	ENST00000543006&7698&10	ENST00000312675&10463&10	ENST00000312675&7755&10	ENST00000570867&532&10	ENST00000425673&6248&12	ENST00000530275&4976&10	ENST00000568559&3238&10	ENST00000357613&3658&10	ENST00000373014&1716&10	ENST00000497719&616&10	ENST00000497434&556&10	ENST00000399280&826&10	ENST00000399277&965&10	ENST00000490395&707&10	ENST00000519466&319&10	ENST00000445217&1407&10	ENST00000588578&2290&10	ENST00000583206&180&10	ENST00000547277&109&10
32	AGGAGAATGGCGTGAACCC	2	ENST00000574314	2345	hsa-miR-5095	ENST00000574314	2514	ENST00000595145&978&10	ENST00000394240&104&10	ENST00000533886&45&10	ENST00000510610&409&10	ENST00000568797&799&10	ENST00000524425&768&10	ENST00000596909&240&10	ENST00000371487&167&10	ENST00000552113&109&10	ENST00000546646&109&10	ENST00000366232&97&10	ENST00000549737&131&10	ENST00000443948&726&10	ENST00000450281&433&10	ENST00000411857&4729&10	ENST00000449697&490&10	ENST00000468695&1123&10	ENST00000504242&177&10	ENST00000502286&197&10	ENST00000439578&142&10	ENST00000563294&233&10	ENST00000564663&340&10	ENST00000543006&10406&10	ENST00000543006&7698&10	ENST00000312675&10463&10	ENST00000312675&7755&10	ENST00000570867&532&10	ENST00000425673&6248&12	ENST00000530275&4976&10	ENST00000568559&3238&10	ENST00000357613&3658&10	ENST00000373014&1716&10	ENST00000497719&616&10	ENST00000497434&556&10	ENST00000399280&826&10	ENST00000399277&965&10	ENST00000490395&707&10	ENST00000519466&319&10	ENST00000445217&1407&10	ENST00000588578&2290&10	ENST00000583206&180&10	ENST00000547277&109&10
32	AGGAGAATGGCGTGAACCC	2	ENST00000573669	1460	hsa-miR-5095	ENST00000573669	1629	ENST00000595145&978&10	ENST00000394240&104&10	ENST00000533886&45&10	ENST00000510610&409&10	ENST00000568797&799&10	ENST00000524425&768&10	ENST00000596909&240&10	ENST00000371487&167&10	ENST00000552113&109&10	ENST00000546646&109&10	ENST00000366232&97&10	ENST00000549737&131&10	ENST00000443948&726&10	ENST00000450281&433&10	ENST00000411857&4729&10	ENST00000449697&490&10	ENST00000468695&1123&10	ENST00000504242&177&10	ENST00000502286&197&10	ENST00000439578&142&10	ENST00000563294&233&10	ENST00000564663&340&10	ENST00000543006&10406&10	ENST00000543006&7698&10	ENST00000312675&10463&10	ENST00000312675&7755&10	ENST00000570867&532&10	ENST00000425673&6248&12	ENST00000530275&4976&10	ENST00000568559&3238&10	ENST00000357613&3658&10	ENST00000373014&1716&10	ENST00000497719&616&10	ENST00000497434&556&10	ENST00000399280&826&10	ENST00000399277&965&10	ENST00000490395&707&10	ENST00000519466&319&10	ENST00000445217&1407&10	ENST00000588578&2290&10	ENST00000583206&180&10	ENST00000547277&109&10
32	AGGAGAATGGCGTGAACCC	2	ENST00000549494	167	hsa-miR-5096	ENST00000549494	256	ENST00000595145&978&10	ENST00000394240&104&10	ENST00000533886&45&10	ENST00000510610&409&10	ENST00000568797&799&10	ENST00000524425&768&10	ENST00000596909&240&10	ENST00000371487&167&10	ENST00000552113&109&10	ENST00000546646&109&10	ENST00000366232&97&10	ENST00000549737&131&10	ENST00000443948&726&10	ENST00000450281&433&10	ENST00000411857&4729&10	ENST00000449697&490&10	ENST00000468695&1123&10	ENST00000504242&177&10	ENST00000502286&197&10	ENST00000439578&142&10	ENST00000563294&233&10	ENST00000564663&340&10	ENST00000543006&10406&10	ENST00000543006&7698&10	ENST00000312675&10463&10	ENST00000312675&7755&10	ENST00000570867&532&10	ENST00000425673&6248&12	ENST00000530275&4976&10	ENST00000568559&3238&10	ENST00000357613&3658&10	ENST00000373014&1716&10	ENST00000497719&616&10	ENST00000497434&556&10	ENST00000399280&826&10	ENST00000399277&965&10	ENST00000490395&707&10	ENST00000519466&319&10	ENST00000445217&1407&10	ENST00000588578&2290&10	ENST00000583206&180&10	ENST00000547277&109&10
32	AGGAGAATGGCGTGAACCC	2	ENST00000484535	1141	hsa-miR-5096	ENST00000484535	1232	ENST00000595145&978&10	ENST00000394240&104&10	ENST00000533886&45&10	ENST00000510610&409&10	ENST00000568797&799&10	ENST00000524425&768&10	ENST00000596909&240&10	ENST00000371487&167&10	ENST00000552113&109&10	ENST00000546646&109&10	ENST00000366232&97&10	ENST00000549737&131&10	ENST00000443948&726&10	ENST00000450281&433&10	ENST00000411857&4729&10	ENST00000449697&490&10	ENST00000468695&1123&10	ENST00000504242&177&10	ENST00000502286&197&10	ENST00000439578&142&10	ENST00000563294&233&10	ENST00000564663&340&10	ENST00000543006&10406&10	ENST00000543006&7698&10	ENST00000312675&10463&10	ENST00000312675&7755&10	ENST00000570867&532&10	ENST00000425673&6248&12	ENST00000530275&4976&10	ENST00000568559&3238&10	ENST00000357613&3658&10	ENST00000373014&1716&10	ENST00000497719&616&10	ENST00000497434&556&10	ENST00000399280&826&10	ENST00000399277&965&10	ENST00000490395&707&10	ENST00000519466&319&10	ENST00000445217&1407&10	ENST00000588578&2290&10	ENST00000583206&180&10	ENST00000547277&109&10
32	AGGAGAATGGCGTGAACCC	2	ENST00000504855	210	hsa-miR-5585-3p	ENST00000504855	230	ENST00000595145&978&10	ENST00000394240&104&10	ENST00000533886&45&10	ENST00000510610&409&10	ENST00000568797&799&10	ENST00000524425&768&10	ENST00000596909&240&10	ENST00000371487&167&10	ENST00000552113&109&10	ENST00000546646&109&10	ENST00000366232&97&10	ENST00000549737&131&10	ENST00000443948&726&10	ENST00000450281&433&10	ENST00000411857&4729&10	ENST00000449697&490&10	ENST00000468695&1123&10	ENST00000504242&177&10	ENST00000502286&197&10	ENST00000439578&142&10	ENST00000563294&233&10	ENST00000564663&340&10	ENST00000543006&10406&10	ENST00000543006&7698&10	ENST00000312675&10463&10	ENST00000312675&7755&10	ENST00000570867&532&10	ENST00000425673&6248&12	ENST00000530275&4976&10	ENST00000568559&3238&10	ENST00000357613&3658&10	ENST00000373014&1716&10	ENST00000497719&616&10	ENST00000497434&556&10	ENST00000399280&826&10	ENST00000399277&965&10	ENST00000490395&707&10	ENST00000519466&319&10	ENST00000445217&1407&10	ENST00000588578&2290&10	ENST00000583206&180&10	ENST00000547277&109&10
32	AGGAGAATGGCGTGAACCC	2	ENST00000586372	2923	hsa-miR-5585-3p	ENST00000586372	2943	ENST00000595145&978&10	ENST00000394240&104&10	ENST00000533886&45&10	ENST00000510610&409&10	ENST00000568797&799&10	ENST00000524425&768&10	ENST00000596909&240&10	ENST00000371487&167&10	ENST00000552113&109&10	ENST00000546646&109&10	ENST00000366232&97&10	ENST00000549737&131&10	ENST00000443948&726&10	ENST00000450281&433&10	ENST00000411857&4729&10	ENST00000449697&490&10	ENST00000468695&1123&10	ENST00000504242&177&10	ENST00000502286&197&10	ENST00000439578&142&10	ENST00000563294&233&10	ENST00000564663&340&10	ENST00000543006&10406&10	ENST00000543006&7698&10	ENST00000312675&10463&10	ENST00000312675&7755&10	ENST00000570867&532&10	ENST00000425673&6248&12	ENST00000530275&4976&10	ENST00000568559&3238&10	ENST00000357613&3658&10	ENST00000373014&1716&10	ENST00000497719&616&10	ENST00000497434&556&10	ENST00000399280&826&10	ENST00000399277&965&10	ENST00000490395&707&10	ENST00000519466&319&10	ENST00000445217&1407&10	ENST00000588578&2290&10	ENST00000583206&180&10	ENST00000547277&109&10
33	GCTCACTGCAACCTCTGCCTCCCA	3	ENST00000465342	3042	hsa-miR-1273g-3p	ENST00000465342	3060	ENST00000563704&1399&35	ENST00000562696&280&35	ENST00000458361&3929&35	ENST00000458361&1076&35	ENST00000549386&221&35	ENST00000582142&437&35	ENST00000455945&3929&35	ENST00000455945&1076&35	ENST00000453209&3925&35	ENST00000453209&1076&35	ENST00000415153&3929&35	ENST00000415153&1076&35	ENST00000414662&3926&35	ENST00000437716&3925&35	ENST00000437716&1076&35	ENST00000558989&1106&11	ENST00000324306&6996&35	ENST00000324306&6679&11	ENST00000472260&845&11	ENST00000530529&3197&35	ENST00000434945&3367&35	ENST00000323468&3298&35	ENST00000489047&3329&11
34	CCCAGGCTGGAGTGCAGTGGCAC	2	ENST00000366391	45	hsa-miR-1285-3p	ENST00000366391	48	ENST00000505153&5631&16
34	CCCAGGCTGGAGTGCAGTGGCAC	2	ENST00000588534	75	hsa-miR-1285-3p	ENST00000588534	78	ENST00000505153&5631&16
34	CCCAGGCTGGAGTGCAGTGGCAC	2	ENST00000547793	34	hsa-miR-1273a	ENST00000547793	40	ENST00000505153&5631&16
34	CCCAGGCTGGAGTGCAGTGGCAC	2	ENST00000275053	6737	hsa-miR-1273a	ENST00000275053	6743	ENST00000505153&5631&16
34	CCCAGGCTGGAGTGCAGTGGCAC	2	ENST00000537394	444	hsa-miR-1273a	ENST00000537394	450	ENST00000505153&5631&16
34	CCCAGGCTGGAGTGCAGTGGCAC	2	ENST00000590071	4399	hsa-miR-1273c	ENST00000590071	4105	ENST00000505153&5631&16
34	CCCAGGCTGGAGTGCAGTGGCAC	2	ENST00000556243	245	hsa-miR-1273e	ENST00000556243	172	ENST00000505153&5631&16
34	CCCAGGCTGGAGTGCAGTGGCAC	2	ENST00000586025	2354	hsa-miR-1273g-3p	ENST00000586025	2342	ENST00000505153&5631&16
34	CCCAGGCTGGAGTGCAGTGGCAC	2	ENST00000357137	5385	hsa-miR-1273f	ENST00000357137	5342	ENST00000505153&5631&16
34	CCCAGGCTGGAGTGCAGTGGCAC	2	ENST00000432854	3529	hsa-miR-1273f	ENST00000432854	3486	ENST00000505153&5631&16
34	CCCAGGCTGGAGTGCAGTGGCAC	2	ENST00000600299	572	hsa-miR-1273g-3p	ENST00000600299	560	ENST00000505153&5631&16
35	GAGACAGGGTTTCTCCAT	2	ENST00000505907	3248	hsa-miR-1273f	ENST00000505907	3351	ENST00000491289&4218&10	ENST00000323303&3559&10	ENST00000233892&3358&10	ENST00000506177&477&10	ENST00000541184&3732&27	ENST00000373367&3512&27	ENST00000600463&542&17	ENST00000583150&136&11
36	ATGTTGGTCAGGCTGGTC	4	ENST00000585465	1694	hsa-miR-1273a	ENST00000585465	1858	ENST00000511755&756&10	ENST00000377597&878&10	ENST00000560128&1603&25	ENST00000584831&2416&12	ENST00000597346&79583&12	ENST00000562760&1011&10	ENST00000596632&53&25	ENST00000600090&168&10	ENST00000504658&768&25	ENST00000581901&2093&11	ENST00000567327&2536&12	ENST00000568911&4767&10	ENST00000460528&1680&10	ENST00000551597&290&10	ENST00000506387&651&12	ENST00000393978&631&12	ENST00000560958&1463&10	ENST00000446101&3296&10	ENST00000381680&1612&12	ENST00000366223&2154&10	ENST00000580574&702&25	ENST00000354451&1345&12	ENST00000595236&1900&10	ENST00000573424&3192&10	ENST00000297534&950&10	ENST00000343526&6938&25	ENST00000491289&4065&12	ENST00000491289&4201&12	ENST00000323303&3542&12	ENST00000233892&3341&12	ENST00000382349&5144&12	ENST00000572919&4555&10	ENST00000547066&355&10	ENST00000547581&554&10	ENST00000394434&4543&10	ENST00000311317&2719&25	ENST00000460168&2037&10	ENST00000427635&1816&10	ENST00000274242&3077&10	ENST00000334231&5389&10	ENST00000408978&5505&10	ENST00000317935&5455&10
36	ATGTTGGTCAGGCTGGTC	4	ENST00000590071	4399	hsa-miR-1273c	ENST00000590071	4264	ENST00000511755&756&10	ENST00000377597&878&10	ENST00000560128&1603&25	ENST00000584831&2416&12	ENST00000597346&79583&12	ENST00000562760&1011&10	ENST00000596632&53&25	ENST00000600090&168&10	ENST00000504658&768&25	ENST00000581901&2093&11	ENST00000567327&2536&12	ENST00000568911&4767&10	ENST00000460528&1680&10	ENST00000551597&290&10	ENST00000506387&651&12	ENST00000393978&631&12	ENST00000560958&1463&10	ENST00000446101&3296&10	ENST00000381680&1612&12	ENST00000366223&2154&10	ENST00000580574&702&25	ENST00000354451&1345&12	ENST00000595236&1900&10	ENST00000573424&3192&10	ENST00000297534&950&10	ENST00000343526&6938&25	ENST00000491289&4065&12	ENST00000491289&4201&12	ENST00000323303&3542&12	ENST00000233892&3341&12	ENST00000382349&5144&12	ENST00000572919&4555&10	ENST00000547066&355&10	ENST00000547581&554&10	ENST00000394434&4543&10	ENST00000311317&2719&25	ENST00000460168&2037&10	ENST00000427635&1816&10	ENST00000274242&3077&10	ENST00000334231&5389&10	ENST00000408978&5505&10	ENST00000317935&5455&10
36	ATGTTGGTCAGGCTGGTC	4	ENST00000568109	223	hsa-miR-1273e	ENST00000568109	327	ENST00000511755&756&10	ENST00000377597&878&10	ENST00000560128&1603&25	ENST00000584831&2416&12	ENST00000597346&79583&12	ENST00000562760&1011&10	ENST00000596632&53&25	ENST00000600090&168&10	ENST00000504658&768&25	ENST00000581901&2093&11	ENST00000567327&2536&12	ENST00000568911&4767&10	ENST00000460528&1680&10	ENST00000551597&290&10	ENST00000506387&651&12	ENST00000393978&631&12	ENST00000560958&1463&10	ENST00000446101&3296&10	ENST00000381680&1612&12	ENST00000366223&2154&10	ENST00000580574&702&25	ENST00000354451&1345&12	ENST00000595236&1900&10	ENST00000573424&3192&10	ENST00000297534&950&10	ENST00000343526&6938&25	ENST00000491289&4065&12	ENST00000491289&4201&12	ENST00000323303&3542&12	ENST00000233892&3341&12	ENST00000382349&5144&12	ENST00000572919&4555&10	ENST00000547066&355&10	ENST00000547581&554&10	ENST00000394434&4543&10	ENST00000311317&2719&25	ENST00000460168&2037&10	ENST00000427635&1816&10	ENST00000274242&3077&10	ENST00000334231&5389&10	ENST00000408978&5505&10	ENST00000317935&5455&10
36	ATGTTGGTCAGGCTGGTC	4	ENST00000488801	313	hsa-miR-1273e	ENST00000488801	416	ENST00000511755&756&10	ENST00000377597&878&10	ENST00000560128&1603&25	ENST00000584831&2416&12	ENST00000597346&79583&12	ENST00000562760&1011&10	ENST00000596632&53&25	ENST00000600090&168&10	ENST00000504658&768&25	ENST00000581901&2093&11	ENST00000567327&2536&12	ENST00000568911&4767&10	ENST00000460528&1680&10	ENST00000551597&290&10	ENST00000506387&651&12	ENST00000393978&631&12	ENST00000560958&1463&10	ENST00000446101&3296&10	ENST00000381680&1612&12	ENST00000366223&2154&10	ENST00000580574&702&25	ENST00000354451&1345&12	ENST00000595236&1900&10	ENST00000573424&3192&10	ENST00000297534&950&10	ENST00000343526&6938&25	ENST00000491289&4065&12	ENST00000491289&4201&12	ENST00000323303&3542&12	ENST00000233892&3341&12	ENST00000382349&5144&12	ENST00000572919&4555&10	ENST00000547066&355&10	ENST00000547581&554&10	ENST00000394434&4543&10	ENST00000311317&2719&25	ENST00000460168&2037&10	ENST00000427635&1816&10	ENST00000274242&3077&10	ENST00000334231&5389&10	ENST00000408978&5505&10	ENST00000317935&5455&10
36	ATGTTGGTCAGGCTGGTC	4	ENST00000566036	63	hsa-miR-1273f	ENST00000566036	183	ENST00000511755&756&10	ENST00000377597&878&10	ENST00000560128&1603&25	ENST00000584831&2416&12	ENST00000597346&79583&12	ENST00000562760&1011&10	ENST00000596632&53&25	ENST00000600090&168&10	ENST00000504658&768&25	ENST00000581901&2093&11	ENST00000567327&2536&12	ENST00000568911&4767&10	ENST00000460528&1680&10	ENST00000551597&290&10	ENST00000506387&651&12	ENST00000393978&631&12	ENST00000560958&1463&10	ENST00000446101&3296&10	ENST00000381680&1612&12	ENST00000366223&2154&10	ENST00000580574&702&25	ENST00000354451&1345&12	ENST00000595236&1900&10	ENST00000573424&3192&10	ENST00000297534&950&10	ENST00000343526&6938&25	ENST00000491289&4065&12	ENST00000491289&4201&12	ENST00000323303&3542&12	ENST00000233892&3341&12	ENST00000382349&5144&12	ENST00000572919&4555&10	ENST00000547066&355&10	ENST00000547581&554&10	ENST00000394434&4543&10	ENST00000311317&2719&25	ENST00000460168&2037&10	ENST00000427635&1816&10	ENST00000274242&3077&10	ENST00000334231&5389&10	ENST00000408978&5505&10	ENST00000317935&5455&10
36	ATGTTGGTCAGGCTGGTC	4	ENST00000432854	3529	hsa-miR-1273f	ENST00000432854	3641	ENST00000511755&756&10	ENST00000377597&878&10	ENST00000560128&1603&25	ENST00000584831&2416&12	ENST00000597346&79583&12	ENST00000562760&1011&10	ENST00000596632&53&25	ENST00000600090&168&10	ENST00000504658&768&25	ENST00000581901&2093&11	ENST00000567327&2536&12	ENST00000568911&4767&10	ENST00000460528&1680&10	ENST00000551597&290&10	ENST00000506387&651&12	ENST00000393978&631&12	ENST00000560958&1463&10	ENST00000446101&3296&10	ENST00000381680&1612&12	ENST00000366223&2154&10	ENST00000580574&702&25	ENST00000354451&1345&12	ENST00000595236&1900&10	ENST00000573424&3192&10	ENST00000297534&950&10	ENST00000343526&6938&25	ENST00000491289&4065&12	ENST00000491289&4201&12	ENST00000323303&3542&12	ENST00000233892&3341&12	ENST00000382349&5144&12	ENST00000572919&4555&10	ENST00000547066&355&10	ENST00000547581&554&10	ENST00000394434&4543&10	ENST00000311317&2719&25	ENST00000460168&2037&10	ENST00000427635&1816&10	ENST00000274242&3077&10	ENST00000334231&5389&10	ENST00000408978&5505&10	ENST00000317935&5455&10
36	ATGTTGGTCAGGCTGGTC	4	ENST00000406297	3268	hsa-miR-1273f	ENST00000406297	3385	ENST00000511755&756&10	ENST00000377597&878&10	ENST00000560128&1603&25	ENST00000584831&2416&12	ENST00000597346&79583&12	ENST00000562760&1011&10	ENST00000596632&53&25	ENST00000600090&168&10	ENST00000504658&768&25	ENST00000581901&2093&11	ENST00000567327&2536&12	ENST00000568911&4767&10	ENST00000460528&1680&10	ENST00000551597&290&10	ENST00000506387&651&12	ENST00000393978&631&12	ENST00000560958&1463&10	ENST00000446101&3296&10	ENST00000381680&1612&12	ENST00000366223&2154&10	ENST00000580574&702&25	ENST00000354451&1345&12	ENST00000595236&1900&10	ENST00000573424&3192&10	ENST00000297534&950&10	ENST00000343526&6938&25	ENST00000491289&4065&12	ENST00000491289&4201&12	ENST00000323303&3542&12	ENST00000233892&3341&12	ENST00000382349&5144&12	ENST00000572919&4555&10	ENST00000547066&355&10	ENST00000547581&554&10	ENST00000394434&4543&10	ENST00000311317&2719&25	ENST00000460168&2037&10	ENST00000427635&1816&10	ENST00000274242&3077&10	ENST00000334231&5389&10	ENST00000408978&5505&10	ENST00000317935&5455&10
36	ATGTTGGTCAGGCTGGTC	4	ENST00000505907	3248	hsa-miR-1273f	ENST00000505907	3367	ENST00000511755&756&10	ENST00000377597&878&10	ENST00000560128&1603&25	ENST00000584831&2416&12	ENST00000597346&79583&12	ENST00000562760&1011&10	ENST00000596632&53&25	ENST00000600090&168&10	ENST00000504658&768&25	ENST00000581901&2093&11	ENST00000567327&2536&12	ENST00000568911&4767&10	ENST00000460528&1680&10	ENST00000551597&290&10	ENST00000506387&651&12	ENST00000393978&631&12	ENST00000560958&1463&10	ENST00000446101&3296&10	ENST00000381680&1612&12	ENST00000366223&2154&10	ENST00000580574&702&25	ENST00000354451&1345&12	ENST00000595236&1900&10	ENST00000573424&3192&10	ENST00000297534&950&10	ENST00000343526&6938&25	ENST00000491289&4065&12	ENST00000491289&4201&12	ENST00000323303&3542&12	ENST00000233892&3341&12	ENST00000382349&5144&12	ENST00000572919&4555&10	ENST00000547066&355&10	ENST00000547581&554&10	ENST00000394434&4543&10	ENST00000311317&2719&25	ENST00000460168&2037&10	ENST00000427635&1816&10	ENST00000274242&3077&10	ENST00000334231&5389&10	ENST00000408978&5505&10	ENST00000317935&5455&10
36	ATGTTGGTCAGGCTGGTC	4	ENST00000525088	1550	hsa-miR-1273g-3p	ENST00000525088	1706	ENST00000511755&756&10	ENST00000377597&878&10	ENST00000560128&1603&25	ENST00000584831&2416&12	ENST00000597346&79583&12	ENST00000562760&1011&10	ENST00000596632&53&25	ENST00000600090&168&10	ENST00000504658&768&25	ENST00000581901&2093&11	ENST00000567327&2536&12	ENST00000568911&4767&10	ENST00000460528&1680&10	ENST00000551597&290&10	ENST00000506387&651&12	ENST00000393978&631&12	ENST00000560958&1463&10	ENST00000446101&3296&10	ENST00000381680&1612&12	ENST00000366223&2154&10	ENST00000580574&702&25	ENST00000354451&1345&12	ENST00000595236&1900&10	ENST00000573424&3192&10	ENST00000297534&950&10	ENST00000343526&6938&25	ENST00000491289&4065&12	ENST00000491289&4201&12	ENST00000323303&3542&12	ENST00000233892&3341&12	ENST00000382349&5144&12	ENST00000572919&4555&10	ENST00000547066&355&10	ENST00000547581&554&10	ENST00000394434&4543&10	ENST00000311317&2719&25	ENST00000460168&2037&10	ENST00000427635&1816&10	ENST00000274242&3077&10	ENST00000334231&5389&10	ENST00000408978&5505&10	ENST00000317935&5455&10
36	ATGTTGGTCAGGCTGGTC	4	ENST00000525088	1550	hsa-miR-1273g-3p	ENST00000525088	1843	ENST00000511755&756&10	ENST00000377597&878&10	ENST00000560128&1603&25	ENST00000584831&2416&12	ENST00000597346&79583&12	ENST00000562760&1011&10	ENST00000596632&53&25	ENST00000600090&168&10	ENST00000504658&768&25	ENST00000581901&2093&11	ENST00000567327&2536&12	ENST00000568911&4767&10	ENST00000460528&1680&10	ENST00000551597&290&10	ENST00000506387&651&12	ENST00000393978&631&12	ENST00000560958&1463&10	ENST00000446101&3296&10	ENST00000381680&1612&12	ENST00000366223&2154&10	ENST00000580574&702&25	ENST00000354451&1345&12	ENST00000595236&1900&10	ENST00000573424&3192&10	ENST00000297534&950&10	ENST00000343526&6938&25	ENST00000491289&4065&12	ENST00000491289&4201&12	ENST00000323303&3542&12	ENST00000233892&3341&12	ENST00000382349&5144&12	ENST00000572919&4555&10	ENST00000547066&355&10	ENST00000547581&554&10	ENST00000394434&4543&10	ENST00000311317&2719&25	ENST00000460168&2037&10	ENST00000427635&1816&10	ENST00000274242&3077&10	ENST00000334231&5389&10	ENST00000408978&5505&10	ENST00000317935&5455&10
37	CCAGGCTGGAGTGCAGTGG	2	ENST00000366391	45	hsa-miR-1285-3p	ENST00000366391	49	ENST00000505153&5631&16
37	CCAGGCTGGAGTGCAGTGG	2	ENST00000588534	75	hsa-miR-1285-3p	ENST00000588534	79	ENST00000505153&5631&16
37	CCAGGCTGGAGTGCAGTGG	2	ENST00000310045	8785	hsa-miR-1285-3p	ENST00000310045	8789	ENST00000505153&5631&16
37	CCAGGCTGGAGTGCAGTGG	2	ENST00000413543	3566	hsa-miR-1285-3p	ENST00000413543	3570	ENST00000505153&5631&16
37	CCAGGCTGGAGTGCAGTGG	2	ENST00000572659	8785	hsa-miR-1285-3p	ENST00000572659	8789	ENST00000505153&5631&16
37	CCAGGCTGGAGTGCAGTGG	2	ENST00000523879	264	hsa-miR-1285-3p	ENST00000523879	268	ENST00000505153&5631&16
37	CCAGGCTGGAGTGCAGTGG	2	ENST00000544423	527	hsa-miR-1285-3p	ENST00000544423	531	ENST00000505153&5631&16
37	CCAGGCTGGAGTGCAGTGG	2	ENST00000442850	84	hsa-miR-1285-3p	ENST00000442850	88	ENST00000505153&5631&16
37	CCAGGCTGGAGTGCAGTGG	2	ENST00000481134	1515	hsa-miR-1285-3p	ENST00000481134	1519	ENST00000505153&5631&16
37	CCAGGCTGGAGTGCAGTGG	2	ENST00000366374	105	hsa-miR-1285-3p	ENST00000366374	109	ENST00000505153&5631&16
37	CCAGGCTGGAGTGCAGTGG	2	ENST00000573732	680	hsa-miR-1285-3p	ENST00000573732	684	ENST00000505153&5631&16
37	CCAGGCTGGAGTGCAGTGG	2	ENST00000597720	680	hsa-miR-1285-3p	ENST00000597720	684	ENST00000505153&5631&16
37	CCAGGCTGGAGTGCAGTGG	2	ENST00000598250	680	hsa-miR-1285-3p	ENST00000598250	684	ENST00000505153&5631&16
37	CCAGGCTGGAGTGCAGTGG	2	ENST00000594995	680	hsa-miR-1285-3p	ENST00000594995	684	ENST00000505153&5631&16
37	CCAGGCTGGAGTGCAGTGG	2	ENST00000598631	680	hsa-miR-1285-3p	ENST00000598631	684	ENST00000505153&5631&16
37	CCAGGCTGGAGTGCAGTGG	2	ENST00000595501	248	hsa-miR-1273a	ENST00000595501	255	ENST00000505153&5631&16
37	CCAGGCTGGAGTGCAGTGG	2	ENST00000473778	1242	hsa-miR-1273a	ENST00000473778	1249	ENST00000505153&5631&16
37	CCAGGCTGGAGTGCAGTGG	2	ENST00000503602	1036	hsa-miR-1273a	ENST00000503602	1043	ENST00000505153&5631&16
37	CCAGGCTGGAGTGCAGTGG	2	ENST00000359815	30	hsa-miR-1273a	ENST00000359815	37	ENST00000505153&5631&16
37	CCAGGCTGGAGTGCAGTGG	2	ENST00000562449	22	hsa-miR-1273a	ENST00000562449	29	ENST00000505153&5631&16
37	CCAGGCTGGAGTGCAGTGG	2	ENST00000479136	28	hsa-miR-1273a	ENST00000479136	35	ENST00000505153&5631&16
37	CCAGGCTGGAGTGCAGTGG	2	ENST00000470464	2427	hsa-miR-1273a	ENST00000470464	2434	ENST00000505153&5631&16
37	CCAGGCTGGAGTGCAGTGG	2	ENST00000485585	2427	hsa-miR-1273a	ENST00000485585	2434	ENST00000505153&5631&16
37	CCAGGCTGGAGTGCAGTGG	2	ENST00000495194	2426	hsa-miR-1273a	ENST00000495194	2433	ENST00000505153&5631&16
37	CCAGGCTGGAGTGCAGTGG	2	ENST00000486105	2425	hsa-miR-1273a	ENST00000486105	2432	ENST00000505153&5631&16
37	CCAGGCTGGAGTGCAGTGG	2	ENST00000475993	2425	hsa-miR-1273a	ENST00000475993	2432	ENST00000505153&5631&16
37	CCAGGCTGGAGTGCAGTGG	2	ENST00000529187	2814	hsa-miR-1273a	ENST00000529187	2821	ENST00000505153&5631&16
37	CCAGGCTGGAGTGCAGTGG	2	ENST00000531346	2663	hsa-miR-1273a	ENST00000531346	2670	ENST00000505153&5631&16
37	CCAGGCTGGAGTGCAGTGG	2	ENST00000375095	3030	hsa-miR-1273a	ENST00000375095	3037	ENST00000505153&5631&16
37	CCAGGCTGGAGTGCAGTGG	2	ENST00000494413	2425	hsa-miR-1273a	ENST00000494413	2432	ENST00000505153&5631&16
37	CCAGGCTGGAGTGCAGTGG	2	ENST00000475528	2427	hsa-miR-1273a	ENST00000475528	2434	ENST00000505153&5631&16
37	CCAGGCTGGAGTGCAGTGG	2	ENST00000547793	34	hsa-miR-1273a	ENST00000547793	41	ENST00000505153&5631&16
37	CCAGGCTGGAGTGCAGTGG	2	ENST00000366261	52	hsa-miR-1273a	ENST00000366261	59	ENST00000505153&5631&16
37	CCAGGCTGGAGTGCAGTGG	2	ENST00000504241	1914	hsa-miR-1273a	ENST00000504241	1921	ENST00000505153&5631&16
37	CCAGGCTGGAGTGCAGTGG	2	ENST00000275053	6737	hsa-miR-1273a	ENST00000275053	6744	ENST00000505153&5631&16
37	CCAGGCTGGAGTGCAGTGG	2	ENST00000588024	124	hsa-miR-1273a	ENST00000588024	131	ENST00000505153&5631&16
37	CCAGGCTGGAGTGCAGTGG	2	ENST00000537394	444	hsa-miR-1273a	ENST00000537394	451	ENST00000505153&5631&16
37	CCAGGCTGGAGTGCAGTGG	2	ENST00000563972	987	hsa-miR-1972	ENST00000563972	1221	ENST00000505153&5631&16
37	CCAGGCTGGAGTGCAGTGG	2	ENST00000548157	215	hsa-miR-1972	ENST00000548157	305	ENST00000505153&5631&16
37	CCAGGCTGGAGTGCAGTGG	2	ENST00000547850	215	hsa-miR-1972	ENST00000547850	305	ENST00000505153&5631&16
37	CCAGGCTGGAGTGCAGTGG	2	ENST00000590071	4399	hsa-miR-1273c	ENST00000590071	4106	ENST00000505153&5631&16
37	CCAGGCTGGAGTGCAGTGG	2	ENST00000548189	88	hsa-miR-1273e	ENST00000548189	34	ENST00000505153&5631&16
37	CCAGGCTGGAGTGCAGTGG	2	ENST00000450492	111	hsa-miR-1273e	ENST00000450492	56	ENST00000505153&5631&16
37	CCAGGCTGGAGTGCAGTGG	2	ENST00000553180	88	hsa-miR-1273e	ENST00000553180	34	ENST00000505153&5631&16
37	CCAGGCTGGAGTGCAGTGG	2	ENST00000549082	88	hsa-miR-1273e	ENST00000549082	34	ENST00000505153&5631&16
37	CCAGGCTGGAGTGCAGTGG	2	ENST00000552559	88	hsa-miR-1273e	ENST00000552559	34	ENST00000505153&5631&16
37	CCAGGCTGGAGTGCAGTGG	2	ENST00000552807	88	hsa-miR-1273e	ENST00000552807	34	ENST00000505153&5631&16
37	CCAGGCTGGAGTGCAGTGG	2	ENST00000552859	88	hsa-miR-1273e	ENST00000552859	34	ENST00000505153&5631&16
37	CCAGGCTGGAGTGCAGTGG	2	ENST00000330266	3259	hsa-miR-1273e	ENST00000330266	3204	ENST00000505153&5631&16
37	CCAGGCTGGAGTGCAGTGG	2	ENST00000500236	623	hsa-miR-1273e	ENST00000500236	568	ENST00000505153&5631&16
37	CCAGGCTGGAGTGCAGTGG	2	ENST00000489288	1033	hsa-miR-1273e	ENST00000489288	978	ENST00000505153&5631&16
37	CCAGGCTGGAGTGCAGTGG	2	ENST00000464682	788	hsa-miR-1273e	ENST00000464682	733	ENST00000505153&5631&16
37	CCAGGCTGGAGTGCAGTGG	2	ENST00000461997	1007	hsa-miR-1273e	ENST00000461997	952	ENST00000505153&5631&16
37	CCAGGCTGGAGTGCAGTGG	2	ENST00000475411	2347	hsa-miR-1273e	ENST00000475411	2292	ENST00000505153&5631&16
37	CCAGGCTGGAGTGCAGTGG	2	ENST00000599628	1486	hsa-miR-1273e	ENST00000599628	980	ENST00000505153&5631&16
37	CCAGGCTGGAGTGCAGTGG	2	ENST00000485088	1523	hsa-miR-1273e	ENST00000485088	1468	ENST00000505153&5631&16
37	CCAGGCTGGAGTGCAGTGG	2	ENST00000466582	1523	hsa-miR-1273e	ENST00000466582	1468	ENST00000505153&5631&16
37	CCAGGCTGGAGTGCAGTGG	2	ENST00000556243	245	hsa-miR-1273e	ENST00000556243	173	ENST00000505153&5631&16
37	CCAGGCTGGAGTGCAGTGG	2	ENST00000566036	63	hsa-miR-1273f	ENST00000566036	21	ENST00000505153&5631&16
37	CCAGGCTGGAGTGCAGTGG	2	ENST00000455424	653	hsa-miR-1273g-3p	ENST00000455424	642	ENST00000505153&5631&16
37	CCAGGCTGGAGTGCAGTGG	2	ENST00000586025	2354	hsa-miR-1273g-3p	ENST00000586025	1864	ENST00000505153&5631&16
37	CCAGGCTGGAGTGCAGTGG	2	ENST00000586025	2354	hsa-miR-1273g-3p	ENST00000586025	2343	ENST00000505153&5631&16
37	CCAGGCTGGAGTGCAGTGG	2	ENST00000357137	5385	hsa-miR-1273f	ENST00000357137	5343	ENST00000505153&5631&16
37	CCAGGCTGGAGTGCAGTGG	2	ENST00000432854	3529	hsa-miR-1273f	ENST00000432854	3487	ENST00000505153&5631&16
37	CCAGGCTGGAGTGCAGTGG	2	ENST00000600625	1956	hsa-miR-1273f	ENST00000600625	1914	ENST00000505153&5631&16
37	CCAGGCTGGAGTGCAGTGG	2	ENST00000324894	2030	hsa-miR-1273f	ENST00000324894	1988	ENST00000505153&5631&16
37	CCAGGCTGGAGTGCAGTGG	2	ENST00000592861	201	hsa-miR-1273f	ENST00000592861	160	ENST00000505153&5631&16
37	CCAGGCTGGAGTGCAGTGG	2	ENST00000480612	266	hsa-miR-1273f	ENST00000480612	224	ENST00000505153&5631&16
37	CCAGGCTGGAGTGCAGTGG	2	ENST00000523129	1746	hsa-miR-1273g-3p	ENST00000523129	1440	ENST00000505153&5631&16
37	CCAGGCTGGAGTGCAGTGG	2	ENST00000416209	1746	hsa-miR-1273g-3p	ENST00000416209	1440	ENST00000505153&5631&16
37	CCAGGCTGGAGTGCAGTGG	2	ENST00000590717	2615	hsa-miR-1273g-3p	ENST00000590717	2604	ENST00000505153&5631&16
37	CCAGGCTGGAGTGCAGTGG	2	ENST00000589137	941	hsa-miR-1273g-3p	ENST00000589137	930	ENST00000505153&5631&16
37	CCAGGCTGGAGTGCAGTGG	2	ENST00000600299	572	hsa-miR-1273g-3p	ENST00000600299	561	ENST00000505153&5631&16
37	CCAGGCTGGAGTGCAGTGG	2	ENST00000600850	868	hsa-miR-1273g-3p	ENST00000600850	857	ENST00000505153&5631&16
37	CCAGGCTGGAGTGCAGTGG	2	ENST00000573007	297	hsa-miR-1273g-3p	ENST00000573007	286	ENST00000505153&5631&16
37	CCAGGCTGGAGTGCAGTGG	2	ENST00000435295	749	hsa-miR-1273g-3p	ENST00000435295	738	ENST00000505153&5631&16
37	CCAGGCTGGAGTGCAGTGG	2	ENST00000433033	166	hsa-miR-1273g-3p	ENST00000433033	155	ENST00000505153&5631&16
37	CCAGGCTGGAGTGCAGTGG	2	ENST00000562965	705	hsa-miR-1273g-3p	ENST00000562965	694	ENST00000505153&5631&16
37	CCAGGCTGGAGTGCAGTGG	2	ENST00000414795	460	hsa-miR-1273g-3p	ENST00000414795	449	ENST00000505153&5631&16
38	ACTTGGGAGGCTGAGGCA	2	ENST00000366259	697	hsa-miR-5095	ENST00000366259	849	ENST00000597357&115&11	ENST00000515103&665&11
38	ACTTGGGAGGCTGAGGCA	2	ENST00000595787	5312	hsa-miR-5095	ENST00000595787	5462	ENST00000597357&115&11	ENST00000515103&665&11
38	ACTTGGGAGGCTGAGGCA	2	ENST00000369981	7984	hsa-miR-5095	ENST00000369981	8135	ENST00000597357&115&11	ENST00000515103&665&11
38	ACTTGGGAGGCTGAGGCA	2	ENST00000574773	2509	hsa-miR-5095	ENST00000574773	2661	ENST00000597357&115&11	ENST00000515103&665&11
38	ACTTGGGAGGCTGAGGCA	2	ENST00000340855	5312	hsa-miR-5095	ENST00000340855	5462	ENST00000597357&115&11	ENST00000515103&665&11
38	ACTTGGGAGGCTGAGGCA	2	ENST00000473592	1606	hsa-miR-5096	ENST00000473592	1679	ENST00000597357&115&11	ENST00000515103&665&11
38	ACTTGGGAGGCTGAGGCA	2	ENST00000409982	830	hsa-miR-5096	ENST00000409982	902	ENST00000597357&115&11	ENST00000515103&665&11
38	ACTTGGGAGGCTGAGGCA	2	ENST00000378845	1389	hsa-miR-5096	ENST00000378845	1460	ENST00000597357&115&11	ENST00000515103&665&11
38	ACTTGGGAGGCTGAGGCA	2	ENST00000586372	3494	hsa-miR-5585-3p	ENST00000586372	3497	ENST00000597357&115&11	ENST00000515103&665&11
39	AGGCAGGTGGATCATGAGGT	2	ENST00000322753	2459	hsa-miR-5585-3p	ENST00000322753	2342	ENST00000366278&1625&16	ENST00000434635&598&16	ENST00000494840&667&16	ENST00000556170&2038&16	ENST00000557026&1203&16	ENST00000355513&1093&17	ENST00000539605&4231&16	ENST00000262227&230&16	ENST00000483033&2593&16	ENST00000296121&4717&16	ENST00000383806&4718&16	ENST00000383807&4812&16	ENST00000421731&3139&16	ENST00000419585&4895&16	ENST00000502734&305&16	ENST00000509307&191&16	ENST00000523129&1657&16	ENST00000416209&1657&16	ENST00000588382&295&16	ENST00000525436&1194&16	ENST00000543306&1384&16	ENST00000399869&1422&16	ENST00000598139&376&16	ENST00000449451&200&17	ENST00000523895&328&16	ENST00000521819&406&16	ENST00000578293&710&17	ENST00000366392&43&16	ENST00000582078&361&16	ENST00000418902&1003&16	ENST00000437380&2141&16	ENST00000411857&4867&16	ENST00000485034&79&17	ENST00000263080&2773&16	ENST00000543600&1917&16	ENST00000398738&1926&16	ENST00000486832&303&16	ENST00000507855&590&16	ENST00000268070&5784&16	ENST00000517350&1238&16	ENST00000517455&34&16	ENST00000529485&359&16
40	CGATCTCGGCTCACTGCAA	2	ENST00000585465	1694	hsa-miR-1273a	ENST00000585465	1722	ENST00000391625&3857&11	ENST00000424890&2782&10	ENST00000519563&128&10	ENST00000580094&3977&11	ENST00000449800&3977&11	ENST00000567101&2728&11	ENST00000506037&502&10	ENST00000447253&420&10	ENST00000574727&4273&10	ENST00000401486&3025&10	ENST00000417099&1770&69	ENST00000445221&3977&11	ENST00000426371&1074&10	ENST00000451482&986&11	ENST00000598033&337&10	ENST00000599759&386&10	ENST00000548445&269&69	ENST00000456947&3076&69	ENST00000344001&2409&11	ENST00000399398&2691&11	ENST00000475293&7515&11	ENST00000379121&743&11	ENST00000436699&743&11	ENST00000217185&2458&10	ENST00000599568&119&11	ENST00000488894&1867&69	ENST00000488894&1560&11	ENST00000419810&1948&10	ENST00000446464&1852&69	ENST00000265641&4671&10	ENST00000480530&1552&11	ENST00000444549&2271&11	ENST00000455499&1585&11	ENST00000565402&46&10	ENST00000472260&852&11	ENST00000413083&2169&11
40	CGATCTCGGCTCACTGCAA	2	ENST00000275053	6737	hsa-miR-1273a	ENST00000275053	6765	ENST00000391625&3857&11	ENST00000424890&2782&10	ENST00000519563&128&10	ENST00000580094&3977&11	ENST00000449800&3977&11	ENST00000567101&2728&11	ENST00000506037&502&10	ENST00000447253&420&10	ENST00000574727&4273&10	ENST00000401486&3025&10	ENST00000417099&1770&69	ENST00000445221&3977&11	ENST00000426371&1074&10	ENST00000451482&986&11	ENST00000598033&337&10	ENST00000599759&386&10	ENST00000548445&269&69	ENST00000456947&3076&69	ENST00000344001&2409&11	ENST00000399398&2691&11	ENST00000475293&7515&11	ENST00000379121&743&11	ENST00000436699&743&11	ENST00000217185&2458&10	ENST00000599568&119&11	ENST00000488894&1867&69	ENST00000488894&1560&11	ENST00000419810&1948&10	ENST00000446464&1852&69	ENST00000265641&4671&10	ENST00000480530&1552&11	ENST00000444549&2271&11	ENST00000455499&1585&11	ENST00000565402&46&10	ENST00000472260&852&11	ENST00000413083&2169&11
40	CGATCTCGGCTCACTGCAA	2	ENST00000599628	1486	hsa-miR-1273e	ENST00000599628	1001	ENST00000391625&3857&11	ENST00000424890&2782&10	ENST00000519563&128&10	ENST00000580094&3977&11	ENST00000449800&3977&11	ENST00000567101&2728&11	ENST00000506037&502&10	ENST00000447253&420&10	ENST00000574727&4273&10	ENST00000401486&3025&10	ENST00000417099&1770&69	ENST00000445221&3977&11	ENST00000426371&1074&10	ENST00000451482&986&11	ENST00000598033&337&10	ENST00000599759&386&10	ENST00000548445&269&69	ENST00000456947&3076&69	ENST00000344001&2409&11	ENST00000399398&2691&11	ENST00000475293&7515&11	ENST00000379121&743&11	ENST00000436699&743&11	ENST00000217185&2458&10	ENST00000599568&119&11	ENST00000488894&1867&69	ENST00000488894&1560&11	ENST00000419810&1948&10	ENST00000446464&1852&69	ENST00000265641&4671&10	ENST00000480530&1552&11	ENST00000444549&2271&11	ENST00000455499&1585&11	ENST00000565402&46&10	ENST00000472260&852&11	ENST00000413083&2169&11
40	CGATCTCGGCTCACTGCAA	2	ENST00000523129	1746	hsa-miR-1273g-3p	ENST00000523129	1756	ENST00000391625&3857&11	ENST00000424890&2782&10	ENST00000519563&128&10	ENST00000580094&3977&11	ENST00000449800&3977&11	ENST00000567101&2728&11	ENST00000506037&502&10	ENST00000447253&420&10	ENST00000574727&4273&10	ENST00000401486&3025&10	ENST00000417099&1770&69	ENST00000445221&3977&11	ENST00000426371&1074&10	ENST00000451482&986&11	ENST00000598033&337&10	ENST00000599759&386&10	ENST00000548445&269&69	ENST00000456947&3076&69	ENST00000344001&2409&11	ENST00000399398&2691&11	ENST00000475293&7515&11	ENST00000379121&743&11	ENST00000436699&743&11	ENST00000217185&2458&10	ENST00000599568&119&11	ENST00000488894&1867&69	ENST00000488894&1560&11	ENST00000419810&1948&10	ENST00000446464&1852&69	ENST00000265641&4671&10	ENST00000480530&1552&11	ENST00000444549&2271&11	ENST00000455499&1585&11	ENST00000565402&46&10	ENST00000472260&852&11	ENST00000413083&2169&11
40	CGATCTCGGCTCACTGCAA	2	ENST00000416209	1746	hsa-miR-1273g-3p	ENST00000416209	1756	ENST00000391625&3857&11	ENST00000424890&2782&10	ENST00000519563&128&10	ENST00000580094&3977&11	ENST00000449800&3977&11	ENST00000567101&2728&11	ENST00000506037&502&10	ENST00000447253&420&10	ENST00000574727&4273&10	ENST00000401486&3025&10	ENST00000417099&1770&69	ENST00000445221&3977&11	ENST00000426371&1074&10	ENST00000451482&986&11	ENST00000598033&337&10	ENST00000599759&386&10	ENST00000548445&269&69	ENST00000456947&3076&69	ENST00000344001&2409&11	ENST00000399398&2691&11	ENST00000475293&7515&11	ENST00000379121&743&11	ENST00000436699&743&11	ENST00000217185&2458&10	ENST00000599568&119&11	ENST00000488894&1867&69	ENST00000488894&1560&11	ENST00000419810&1948&10	ENST00000446464&1852&69	ENST00000265641&4671&10	ENST00000480530&1552&11	ENST00000444549&2271&11	ENST00000455499&1585&11	ENST00000565402&46&10	ENST00000472260&852&11	ENST00000413083&2169&11
40	CGATCTCGGCTCACTGCAA	2	ENST00000518639	956	hsa-miR-1273g-3p	ENST00000518639	966	ENST00000391625&3857&11	ENST00000424890&2782&10	ENST00000519563&128&10	ENST00000580094&3977&11	ENST00000449800&3977&11	ENST00000567101&2728&11	ENST00000506037&502&10	ENST00000447253&420&10	ENST00000574727&4273&10	ENST00000401486&3025&10	ENST00000417099&1770&69	ENST00000445221&3977&11	ENST00000426371&1074&10	ENST00000451482&986&11	ENST00000598033&337&10	ENST00000599759&386&10	ENST00000548445&269&69	ENST00000456947&3076&69	ENST00000344001&2409&11	ENST00000399398&2691&11	ENST00000475293&7515&11	ENST00000379121&743&11	ENST00000436699&743&11	ENST00000217185&2458&10	ENST00000599568&119&11	ENST00000488894&1867&69	ENST00000488894&1560&11	ENST00000419810&1948&10	ENST00000446464&1852&69	ENST00000265641&4671&10	ENST00000480530&1552&11	ENST00000444549&2271&11	ENST00000455499&1585&11	ENST00000565402&46&10	ENST00000472260&852&11	ENST00000413083&2169&11
40	CGATCTCGGCTCACTGCAA	2	ENST00000509563	379	hsa-miR-1273g-3p	ENST00000509563	389	ENST00000391625&3857&11	ENST00000424890&2782&10	ENST00000519563&128&10	ENST00000580094&3977&11	ENST00000449800&3977&11	ENST00000567101&2728&11	ENST00000506037&502&10	ENST00000447253&420&10	ENST00000574727&4273&10	ENST00000401486&3025&10	ENST00000417099&1770&69	ENST00000445221&3977&11	ENST00000426371&1074&10	ENST00000451482&986&11	ENST00000598033&337&10	ENST00000599759&386&10	ENST00000548445&269&69	ENST00000456947&3076&69	ENST00000344001&2409&11	ENST00000399398&2691&11	ENST00000475293&7515&11	ENST00000379121&743&11	ENST00000436699&743&11	ENST00000217185&2458&10	ENST00000599568&119&11	ENST00000488894&1867&69	ENST00000488894&1560&11	ENST00000419810&1948&10	ENST00000446464&1852&69	ENST00000265641&4671&10	ENST00000480530&1552&11	ENST00000444549&2271&11	ENST00000455499&1585&11	ENST00000565402&46&10	ENST00000472260&852&11	ENST00000413083&2169&11
40	CGATCTCGGCTCACTGCAA	2	ENST00000562965	705	hsa-miR-1273g-3p	ENST00000562965	715	ENST00000391625&3857&11	ENST00000424890&2782&10	ENST00000519563&128&10	ENST00000580094&3977&11	ENST00000449800&3977&11	ENST00000567101&2728&11	ENST00000506037&502&10	ENST00000447253&420&10	ENST00000574727&4273&10	ENST00000401486&3025&10	ENST00000417099&1770&69	ENST00000445221&3977&11	ENST00000426371&1074&10	ENST00000451482&986&11	ENST00000598033&337&10	ENST00000599759&386&10	ENST00000548445&269&69	ENST00000456947&3076&69	ENST00000344001&2409&11	ENST00000399398&2691&11	ENST00000475293&7515&11	ENST00000379121&743&11	ENST00000436699&743&11	ENST00000217185&2458&10	ENST00000599568&119&11	ENST00000488894&1867&69	ENST00000488894&1560&11	ENST00000419810&1948&10	ENST00000446464&1852&69	ENST00000265641&4671&10	ENST00000480530&1552&11	ENST00000444549&2271&11	ENST00000455499&1585&11	ENST00000565402&46&10	ENST00000472260&852&11	ENST00000413083&2169&11
41	GGGCGGATCACCTGAGGT	2	ENST00000491289	4196	hsa-miR-5096	ENST00000491289	4014	ENST00000565150&1117&11	ENST00000566036&237&11	ENST00000476886&1639&11	ENST00000374976&506&17	ENST00000589217&1970&17	ENST00000592939&506&17	ENST00000565256&970&11	ENST00000566583&1074&11	ENST00000434411&1872&11	ENST00000416301&3374&11	ENST00000506314&2568&11	ENST00000590969&1143&11	ENST00000589439&1786&11	ENST00000588029&1143&11	ENST00000587221&1786&11	ENST00000588082&1143&11	ENST00000585529&1786&11	ENST00000587249&1143&11	ENST00000592538&1786&11	ENST00000589366&1143&11	ENST00000586069&1786&11	ENST00000592868&1143&11	ENST00000590939&1786&11	ENST00000589483&1143&11	ENST00000586303&1786&11	ENST00000592635&1143&11	ENST00000587996&1786&11	ENST00000573109&2012&11	ENST00000550383&4011&11	ENST00000174621&3364&11	ENST00000399756&3607&11	ENST00000571088&3294&11	ENST00000399759&3281&11	ENST00000572705&3355&11	ENST00000429591&1702&11	ENST00000443026&1790&11	ENST00000398387&1689&11	ENST00000526890&4668&11	ENST00000534625&72&17	ENST00000538156&237&11	ENST00000289248&237&11	ENST00000593062&665&11
41	GGGCGGATCACCTGAGGT	2	ENST00000575379	820	hsa-miR-5095	ENST00000575379	854	ENST00000565150&1117&11	ENST00000566036&237&11	ENST00000476886&1639&11	ENST00000374976&506&17	ENST00000589217&1970&17	ENST00000592939&506&17	ENST00000565256&970&11	ENST00000566583&1074&11	ENST00000434411&1872&11	ENST00000416301&3374&11	ENST00000506314&2568&11	ENST00000590969&1143&11	ENST00000589439&1786&11	ENST00000588029&1143&11	ENST00000587221&1786&11	ENST00000588082&1143&11	ENST00000585529&1786&11	ENST00000587249&1143&11	ENST00000592538&1786&11	ENST00000589366&1143&11	ENST00000586069&1786&11	ENST00000592868&1143&11	ENST00000590939&1786&11	ENST00000589483&1143&11	ENST00000586303&1786&11	ENST00000592635&1143&11	ENST00000587996&1786&11	ENST00000573109&2012&11	ENST00000550383&4011&11	ENST00000174621&3364&11	ENST00000399756&3607&11	ENST00000571088&3294&11	ENST00000399759&3281&11	ENST00000572705&3355&11	ENST00000429591&1702&11	ENST00000443026&1790&11	ENST00000398387&1689&11	ENST00000526890&4668&11	ENST00000534625&72&17	ENST00000538156&237&11	ENST00000289248&237&11	ENST00000593062&665&11
41	GGGCGGATCACCTGAGGT	2	ENST00000576360	1576	hsa-miR-5095	ENST00000576360	1610	ENST00000565150&1117&11	ENST00000566036&237&11	ENST00000476886&1639&11	ENST00000374976&506&17	ENST00000589217&1970&17	ENST00000592939&506&17	ENST00000565256&970&11	ENST00000566583&1074&11	ENST00000434411&1872&11	ENST00000416301&3374&11	ENST00000506314&2568&11	ENST00000590969&1143&11	ENST00000589439&1786&11	ENST00000588029&1143&11	ENST00000587221&1786&11	ENST00000588082&1143&11	ENST00000585529&1786&11	ENST00000587249&1143&11	ENST00000592538&1786&11	ENST00000589366&1143&11	ENST00000586069&1786&11	ENST00000592868&1143&11	ENST00000590939&1786&11	ENST00000589483&1143&11	ENST00000586303&1786&11	ENST00000592635&1143&11	ENST00000587996&1786&11	ENST00000573109&2012&11	ENST00000550383&4011&11	ENST00000174621&3364&11	ENST00000399756&3607&11	ENST00000571088&3294&11	ENST00000399759&3281&11	ENST00000572705&3355&11	ENST00000429591&1702&11	ENST00000443026&1790&11	ENST00000398387&1689&11	ENST00000526890&4668&11	ENST00000534625&72&17	ENST00000538156&237&11	ENST00000289248&237&11	ENST00000593062&665&11
41	GGGCGGATCACCTGAGGT	2	ENST00000306071	1904	hsa-miR-5095	ENST00000306071	1938	ENST00000565150&1117&11	ENST00000566036&237&11	ENST00000476886&1639&11	ENST00000374976&506&17	ENST00000589217&1970&17	ENST00000592939&506&17	ENST00000565256&970&11	ENST00000566583&1074&11	ENST00000434411&1872&11	ENST00000416301&3374&11	ENST00000506314&2568&11	ENST00000590969&1143&11	ENST00000589439&1786&11	ENST00000588029&1143&11	ENST00000587221&1786&11	ENST00000588082&1143&11	ENST00000585529&1786&11	ENST00000587249&1143&11	ENST00000592538&1786&11	ENST00000589366&1143&11	ENST00000586069&1786&11	ENST00000592868&1143&11	ENST00000590939&1786&11	ENST00000589483&1143&11	ENST00000586303&1786&11	ENST00000592635&1143&11	ENST00000587996&1786&11	ENST00000573109&2012&11	ENST00000550383&4011&11	ENST00000174621&3364&11	ENST00000399756&3607&11	ENST00000571088&3294&11	ENST00000399759&3281&11	ENST00000572705&3355&11	ENST00000429591&1702&11	ENST00000443026&1790&11	ENST00000398387&1689&11	ENST00000526890&4668&11	ENST00000534625&72&17	ENST00000538156&237&11	ENST00000289248&237&11	ENST00000593062&665&11
41	GGGCGGATCACCTGAGGT	2	ENST00000476203	3829	hsa-miR-5096	ENST00000476203	3784	ENST00000565150&1117&11	ENST00000566036&237&11	ENST00000476886&1639&11	ENST00000374976&506&17	ENST00000589217&1970&17	ENST00000592939&506&17	ENST00000565256&970&11	ENST00000566583&1074&11	ENST00000434411&1872&11	ENST00000416301&3374&11	ENST00000506314&2568&11	ENST00000590969&1143&11	ENST00000589439&1786&11	ENST00000588029&1143&11	ENST00000587221&1786&11	ENST00000588082&1143&11	ENST00000585529&1786&11	ENST00000587249&1143&11	ENST00000592538&1786&11	ENST00000589366&1143&11	ENST00000586069&1786&11	ENST00000592868&1143&11	ENST00000590939&1786&11	ENST00000589483&1143&11	ENST00000586303&1786&11	ENST00000592635&1143&11	ENST00000587996&1786&11	ENST00000573109&2012&11	ENST00000550383&4011&11	ENST00000174621&3364&11	ENST00000399756&3607&11	ENST00000571088&3294&11	ENST00000399759&3281&11	ENST00000572705&3355&11	ENST00000429591&1702&11	ENST00000443026&1790&11	ENST00000398387&1689&11	ENST00000526890&4668&11	ENST00000534625&72&17	ENST00000538156&237&11	ENST00000289248&237&11	ENST00000593062&665&11
41	GGGCGGATCACCTGAGGT	2	ENST00000563793	203	hsa-miR-5096	ENST00000563793	157	ENST00000565150&1117&11	ENST00000566036&237&11	ENST00000476886&1639&11	ENST00000374976&506&17	ENST00000589217&1970&17	ENST00000592939&506&17	ENST00000565256&970&11	ENST00000566583&1074&11	ENST00000434411&1872&11	ENST00000416301&3374&11	ENST00000506314&2568&11	ENST00000590969&1143&11	ENST00000589439&1786&11	ENST00000588029&1143&11	ENST00000587221&1786&11	ENST00000588082&1143&11	ENST00000585529&1786&11	ENST00000587249&1143&11	ENST00000592538&1786&11	ENST00000589366&1143&11	ENST00000586069&1786&11	ENST00000592868&1143&11	ENST00000590939&1786&11	ENST00000589483&1143&11	ENST00000586303&1786&11	ENST00000592635&1143&11	ENST00000587996&1786&11	ENST00000573109&2012&11	ENST00000550383&4011&11	ENST00000174621&3364&11	ENST00000399756&3607&11	ENST00000571088&3294&11	ENST00000399759&3281&11	ENST00000572705&3355&11	ENST00000429591&1702&11	ENST00000443026&1790&11	ENST00000398387&1689&11	ENST00000526890&4668&11	ENST00000534625&72&17	ENST00000538156&237&11	ENST00000289248&237&11	ENST00000593062&665&11
41	GGGCGGATCACCTGAGGT	2	ENST00000296318	8096	hsa-miR-5096	ENST00000296318	8050	ENST00000565150&1117&11	ENST00000566036&237&11	ENST00000476886&1639&11	ENST00000374976&506&17	ENST00000589217&1970&17	ENST00000592939&506&17	ENST00000565256&970&11	ENST00000566583&1074&11	ENST00000434411&1872&11	ENST00000416301&3374&11	ENST00000506314&2568&11	ENST00000590969&1143&11	ENST00000589439&1786&11	ENST00000588029&1143&11	ENST00000587221&1786&11	ENST00000588082&1143&11	ENST00000585529&1786&11	ENST00000587249&1143&11	ENST00000592538&1786&11	ENST00000589366&1143&11	ENST00000586069&1786&11	ENST00000592868&1143&11	ENST00000590939&1786&11	ENST00000589483&1143&11	ENST00000586303&1786&11	ENST00000592635&1143&11	ENST00000587996&1786&11	ENST00000573109&2012&11	ENST00000550383&4011&11	ENST00000174621&3364&11	ENST00000399756&3607&11	ENST00000571088&3294&11	ENST00000399759&3281&11	ENST00000572705&3355&11	ENST00000429591&1702&11	ENST00000443026&1790&11	ENST00000398387&1689&11	ENST00000526890&4668&11	ENST00000534625&72&17	ENST00000538156&237&11	ENST00000289248&237&11	ENST00000593062&665&11
42	AATTAGCCAGGCATGGTGGC	2	ENST00000370791	5077	hsa-miR-5096	ENST00000370791	5109	ENST00000578657&2838&27	ENST00000393067&2771&13	ENST00000231498&7365&10	ENST00000513632&310&29	ENST00000462616&2166&13	ENST00000330276&9714&13	ENST00000394232&9790&13	ENST00000586658&247&13	ENST00000488646&3763&29	ENST00000381166&4335&29	ENST00000427855&4739&29	ENST00000559759&1838&29	ENST00000555700&3509&29	ENST00000557061&2553&29	ENST00000340738&4658&29	ENST00000422722&2996&17	ENST00000003100&2687&17	ENST00000471144&2082&29	ENST00000484427&3585&29	ENST00000518164&391&13
42	AATTAGCCAGGCATGGTGGC	2	ENST00000554660	866	hsa-miR-5096	ENST00000554660	898	ENST00000578657&2838&27	ENST00000393067&2771&13	ENST00000231498&7365&10	ENST00000513632&310&29	ENST00000462616&2166&13	ENST00000330276&9714&13	ENST00000394232&9790&13	ENST00000586658&247&13	ENST00000488646&3763&29	ENST00000381166&4335&29	ENST00000427855&4739&29	ENST00000559759&1838&29	ENST00000555700&3509&29	ENST00000557061&2553&29	ENST00000340738&4658&29	ENST00000422722&2996&17	ENST00000003100&2687&17	ENST00000471144&2082&29	ENST00000484427&3585&29	ENST00000518164&391&13
42	AATTAGCCAGGCATGGTGGC	2	ENST00000590333	83	hsa-miR-5096	ENST00000590333	115	ENST00000578657&2838&27	ENST00000393067&2771&13	ENST00000231498&7365&10	ENST00000513632&310&29	ENST00000462616&2166&13	ENST00000330276&9714&13	ENST00000394232&9790&13	ENST00000586658&247&13	ENST00000488646&3763&29	ENST00000381166&4335&29	ENST00000427855&4739&29	ENST00000559759&1838&29	ENST00000555700&3509&29	ENST00000557061&2553&29	ENST00000340738&4658&29	ENST00000422722&2996&17	ENST00000003100&2687&17	ENST00000471144&2082&29	ENST00000484427&3585&29	ENST00000518164&391&13
42	AATTAGCCAGGCATGGTGGC	2	ENST00000528973	3137	hsa-miR-5585-3p	ENST00000528973	3100	ENST00000578657&2838&27	ENST00000393067&2771&13	ENST00000231498&7365&10	ENST00000513632&310&29	ENST00000462616&2166&13	ENST00000330276&9714&13	ENST00000394232&9790&13	ENST00000586658&247&13	ENST00000488646&3763&29	ENST00000381166&4335&29	ENST00000427855&4739&29	ENST00000559759&1838&29	ENST00000555700&3509&29	ENST00000557061&2553&29	ENST00000340738&4658&29	ENST00000422722&2996&17	ENST00000003100&2687&17	ENST00000471144&2082&29	ENST00000484427&3585&29	ENST00000518164&391&13
42	AATTAGCCAGGCATGGTGGC	2	ENST00000358661	2505	hsa-miR-5585-3p	ENST00000358661	2468	ENST00000578657&2838&27	ENST00000393067&2771&13	ENST00000231498&7365&10	ENST00000513632&310&29	ENST00000462616&2166&13	ENST00000330276&9714&13	ENST00000394232&9790&13	ENST00000586658&247&13	ENST00000488646&3763&29	ENST00000381166&4335&29	ENST00000427855&4739&29	ENST00000559759&1838&29	ENST00000555700&3509&29	ENST00000557061&2553&29	ENST00000340738&4658&29	ENST00000422722&2996&17	ENST00000003100&2687&17	ENST00000471144&2082&29	ENST00000484427&3585&29	ENST00000518164&391&13
42	AATTAGCCAGGCATGGTGGC	2	ENST00000354278	3231	hsa-miR-5585-3p	ENST00000354278	3194	ENST00000578657&2838&27	ENST00000393067&2771&13	ENST00000231498&7365&10	ENST00000513632&310&29	ENST00000462616&2166&13	ENST00000330276&9714&13	ENST00000394232&9790&13	ENST00000586658&247&13	ENST00000488646&3763&29	ENST00000381166&4335&29	ENST00000427855&4739&29	ENST00000559759&1838&29	ENST00000555700&3509&29	ENST00000557061&2553&29	ENST00000340738&4658&29	ENST00000422722&2996&17	ENST00000003100&2687&17	ENST00000471144&2082&29	ENST00000484427&3585&29	ENST00000518164&391&13
42	AATTAGCCAGGCATGGTGGC	2	ENST00000351894	3402	hsa-miR-5585-3p	ENST00000351894	3365	ENST00000578657&2838&27	ENST00000393067&2771&13	ENST00000231498&7365&10	ENST00000513632&310&29	ENST00000462616&2166&13	ENST00000330276&9714&13	ENST00000394232&9790&13	ENST00000586658&247&13	ENST00000488646&3763&29	ENST00000381166&4335&29	ENST00000427855&4739&29	ENST00000559759&1838&29	ENST00000555700&3509&29	ENST00000557061&2553&29	ENST00000340738&4658&29	ENST00000422722&2996&17	ENST00000003100&2687&17	ENST00000471144&2082&29	ENST00000484427&3585&29	ENST00000518164&391&13
42	AATTAGCCAGGCATGGTGGC	2	ENST00000535162	3567	hsa-miR-5585-3p	ENST00000535162	3530	ENST00000578657&2838&27	ENST00000393067&2771&13	ENST00000231498&7365&10	ENST00000513632&310&29	ENST00000462616&2166&13	ENST00000330276&9714&13	ENST00000394232&9790&13	ENST00000586658&247&13	ENST00000488646&3763&29	ENST00000381166&4335&29	ENST00000427855&4739&29	ENST00000559759&1838&29	ENST00000555700&3509&29	ENST00000557061&2553&29	ENST00000340738&4658&29	ENST00000422722&2996&17	ENST00000003100&2687&17	ENST00000471144&2082&29	ENST00000484427&3585&29	ENST00000518164&391&13
42	AATTAGCCAGGCATGGTGGC	2	ENST00000324134	3687	hsa-miR-5585-3p	ENST00000324134	3650	ENST00000578657&2838&27	ENST00000393067&2771&13	ENST00000231498&7365&10	ENST00000513632&310&29	ENST00000462616&2166&13	ENST00000330276&9714&13	ENST00000394232&9790&13	ENST00000586658&247&13	ENST00000488646&3763&29	ENST00000381166&4335&29	ENST00000427855&4739&29	ENST00000559759&1838&29	ENST00000555700&3509&29	ENST00000557061&2553&29	ENST00000340738&4658&29	ENST00000422722&2996&17	ENST00000003100&2687&17	ENST00000471144&2082&29	ENST00000484427&3585&29	ENST00000518164&391&13
43	TGCAGTGGCGCGATCTCGGCT	2	ENST00000599628	1486	hsa-miR-1273e	ENST00000599628	991	ENST00000430391&493&11
43	TGCAGTGGCGCGATCTCGGCT	2	ENST00000492534	703	hsa-miR-1273g-3p	ENST00000492534	703	ENST00000430391&493&11
43	TGCAGTGGCGCGATCTCGGCT	2	ENST00000509563	379	hsa-miR-1273g-3p	ENST00000509563	379	ENST00000430391&493&11
44	ATACAAAAATTAGCTGGGC	3	ENST00000547118	206	hsa-miR-5095	ENST00000547118	315	ENST00000417123&235&14	ENST00000570267&1881&147	ENST00000473434&2331&14	ENST00000555861&1207&147	ENST00000583062&519&14	ENST00000593896&383&24	ENST00000598846&1651&14	ENST00000601776&2466&147	ENST00000392228&316&147	ENST00000358442&316&14	ENST00000354746&494&147	ENST00000590969&1071&147	ENST00000589439&1714&147	ENST00000588029&1071&147	ENST00000587221&1714&147	ENST00000588082&1071&147	ENST00000585529&1714&147	ENST00000587249&1071&147	ENST00000592538&1714&147	ENST00000589366&1071&147	ENST00000586069&1714&147	ENST00000592868&1071&147	ENST00000590939&1714&147	ENST00000589483&1071&147	ENST00000586303&1714&147	ENST00000592635&1071&147	ENST00000587996&1714&147	ENST00000599992&1492&14	ENST00000597825&1920&14	ENST00000594223&1847&14	ENST00000594429&1406&14	ENST00000595999&1588&14	ENST00000599617&1760&14	ENST00000596004&1287&14	ENST00000599205&1557&14	ENST00000595310&2211&14	ENST00000485124&221&24	ENST00000263955&3241&14	ENST00000563818&71&147	ENST00000466236&484&14	ENST00000557830&499&147	ENST00000550255&893&14
44	ATACAAAAATTAGCTGGGC	3	ENST00000573424	1471	hsa-miR-5096	ENST00000573424	1496	ENST00000417123&235&14	ENST00000570267&1881&147	ENST00000473434&2331&14	ENST00000555861&1207&147	ENST00000583062&519&14	ENST00000593896&383&24	ENST00000598846&1651&14	ENST00000601776&2466&147	ENST00000392228&316&147	ENST00000358442&316&14	ENST00000354746&494&147	ENST00000590969&1071&147	ENST00000589439&1714&147	ENST00000588029&1071&147	ENST00000587221&1714&147	ENST00000588082&1071&147	ENST00000585529&1714&147	ENST00000587249&1071&147	ENST00000592538&1714&147	ENST00000589366&1071&147	ENST00000586069&1714&147	ENST00000592868&1071&147	ENST00000590939&1714&147	ENST00000589483&1071&147	ENST00000586303&1714&147	ENST00000592635&1071&147	ENST00000587996&1714&147	ENST00000599992&1492&14	ENST00000597825&1920&14	ENST00000594223&1847&14	ENST00000594429&1406&14	ENST00000595999&1588&14	ENST00000599617&1760&14	ENST00000596004&1287&14	ENST00000599205&1557&14	ENST00000595310&2211&14	ENST00000485124&221&24	ENST00000263955&3241&14	ENST00000563818&71&147	ENST00000466236&484&14	ENST00000557830&499&147	ENST00000550255&893&14
44	ATACAAAAATTAGCTGGGC	3	ENST00000510711	1229	hsa-miR-5096	ENST00000510711	1264	ENST00000417123&235&14	ENST00000570267&1881&147	ENST00000473434&2331&14	ENST00000555861&1207&147	ENST00000583062&519&14	ENST00000593896&383&24	ENST00000598846&1651&14	ENST00000601776&2466&147	ENST00000392228&316&147	ENST00000358442&316&14	ENST00000354746&494&147	ENST00000590969&1071&147	ENST00000589439&1714&147	ENST00000588029&1071&147	ENST00000587221&1714&147	ENST00000588082&1071&147	ENST00000585529&1714&147	ENST00000587249&1071&147	ENST00000592538&1714&147	ENST00000589366&1071&147	ENST00000586069&1714&147	ENST00000592868&1071&147	ENST00000590939&1714&147	ENST00000589483&1071&147	ENST00000586303&1714&147	ENST00000592635&1071&147	ENST00000587996&1714&147	ENST00000599992&1492&14	ENST00000597825&1920&14	ENST00000594223&1847&14	ENST00000594429&1406&14	ENST00000595999&1588&14	ENST00000599617&1760&14	ENST00000596004&1287&14	ENST00000599205&1557&14	ENST00000595310&2211&14	ENST00000485124&221&24	ENST00000263955&3241&14	ENST00000563818&71&147	ENST00000466236&484&14	ENST00000557830&499&147	ENST00000550255&893&14
44	ATACAAAAATTAGCTGGGC	3	ENST00000471863	2080	hsa-miR-5096	ENST00000471863	2105	ENST00000417123&235&14	ENST00000570267&1881&147	ENST00000473434&2331&14	ENST00000555861&1207&147	ENST00000583062&519&14	ENST00000593896&383&24	ENST00000598846&1651&14	ENST00000601776&2466&147	ENST00000392228&316&147	ENST00000358442&316&14	ENST00000354746&494&147	ENST00000590969&1071&147	ENST00000589439&1714&147	ENST00000588029&1071&147	ENST00000587221&1714&147	ENST00000588082&1071&147	ENST00000585529&1714&147	ENST00000587249&1071&147	ENST00000592538&1714&147	ENST00000589366&1071&147	ENST00000586069&1714&147	ENST00000592868&1071&147	ENST00000590939&1714&147	ENST00000589483&1071&147	ENST00000586303&1714&147	ENST00000592635&1071&147	ENST00000587996&1714&147	ENST00000599992&1492&14	ENST00000597825&1920&14	ENST00000594223&1847&14	ENST00000594429&1406&14	ENST00000595999&1588&14	ENST00000599617&1760&14	ENST00000596004&1287&14	ENST00000599205&1557&14	ENST00000595310&2211&14	ENST00000485124&221&24	ENST00000263955&3241&14	ENST00000563818&71&147	ENST00000466236&484&14	ENST00000557830&499&147	ENST00000550255&893&14
44	ATACAAAAATTAGCTGGGC	3	ENST00000576086	799	hsa-miR-5585-3p	ENST00000576086	755	ENST00000417123&235&14	ENST00000570267&1881&147	ENST00000473434&2331&14	ENST00000555861&1207&147	ENST00000583062&519&14	ENST00000593896&383&24	ENST00000598846&1651&14	ENST00000601776&2466&147	ENST00000392228&316&147	ENST00000358442&316&14	ENST00000354746&494&147	ENST00000590969&1071&147	ENST00000589439&1714&147	ENST00000588029&1071&147	ENST00000587221&1714&147	ENST00000588082&1071&147	ENST00000585529&1714&147	ENST00000587249&1071&147	ENST00000592538&1714&147	ENST00000589366&1071&147	ENST00000586069&1714&147	ENST00000592868&1071&147	ENST00000590939&1714&147	ENST00000589483&1071&147	ENST00000586303&1714&147	ENST00000592635&1071&147	ENST00000587996&1714&147	ENST00000599992&1492&14	ENST00000597825&1920&14	ENST00000594223&1847&14	ENST00000594429&1406&14	ENST00000595999&1588&14	ENST00000599617&1760&14	ENST00000596004&1287&14	ENST00000599205&1557&14	ENST00000595310&2211&14	ENST00000485124&221&24	ENST00000263955&3241&14	ENST00000563818&71&147	ENST00000466236&484&14	ENST00000557830&499&147	ENST00000550255&893&14
45	CAGTGGCGTGATCTCGGCTCAC	2	ENST00000413543	3566	hsa-miR-1285-3p	ENST00000413543	3583	ENST00000441801&1488&15	ENST00000366898&3932&15
45	CAGTGGCGTGATCTCGGCTCAC	2	ENST00000492597	258	hsa-miR-1273g-3p	ENST00000492597	260	ENST00000441801&1488&15	ENST00000366898&3932&15
45	CAGTGGCGTGATCTCGGCTCAC	2	ENST00000505031	1227	hsa-miR-1273g-3p	ENST00000505031	1229	ENST00000441801&1488&15	ENST00000366898&3932&15
46	ACAGAGCGAGACTCCATCTCA	2	ENST00000510256	656	hsa-miR-5585-3p	ENST00000510256	750	ENST00000430647&1510&13	ENST00000443346&524&11	ENST00000544012&35&12	ENST00000564735&35&12	ENST00000585443&35&12	ENST00000419892&1504&12	ENST00000460133&4345&11	ENST00000304567&2930&13	ENST00000360566&2930&13	ENST00000311956&2539&13	ENST00000355452&2844&11	ENST00000221307&2987&11	ENST00000430138&511&11	ENST00000437104&38&12	ENST00000460376&1832&13	ENST00000329665&2818&13	ENST00000461452&1777&11	ENST00000471694&1799&12	ENST00000493745&52&12	ENST00000439632&3846&11	ENST00000558121&2002&11	ENST00000558181&3861&11	ENST00000261520&4006&11	ENST00000357137&5347&12	ENST00000573087&740&503	ENST00000573968&580&503	ENST00000255759&815&503	ENST00000369291&1787&12	ENST00000601579&604&13	ENST00000538868&2498&11	ENST00000477641&52&12	ENST00000595464&1844&10	ENST00000552190&84&10	ENST00000549698&84&10
46	ACAGAGCGAGACTCCATCTCA	2	ENST00000510711	1229	hsa-miR-5096	ENST00000510711	1402	ENST00000430647&1510&13	ENST00000443346&524&11	ENST00000544012&35&12	ENST00000564735&35&12	ENST00000585443&35&12	ENST00000419892&1504&12	ENST00000460133&4345&11	ENST00000304567&2930&13	ENST00000360566&2930&13	ENST00000311956&2539&13	ENST00000355452&2844&11	ENST00000221307&2987&11	ENST00000430138&511&11	ENST00000437104&38&12	ENST00000460376&1832&13	ENST00000329665&2818&13	ENST00000461452&1777&11	ENST00000471694&1799&12	ENST00000493745&52&12	ENST00000439632&3846&11	ENST00000558121&2002&11	ENST00000558181&3861&11	ENST00000261520&4006&11	ENST00000357137&5347&12	ENST00000573087&740&503	ENST00000573968&580&503	ENST00000255759&815&503	ENST00000369291&1787&12	ENST00000601579&604&13	ENST00000538868&2498&11	ENST00000477641&52&12	ENST00000595464&1844&10	ENST00000552190&84&10	ENST00000549698&84&10
46	ACAGAGCGAGACTCCATCTCA	2	ENST00000528973	3137	hsa-miR-5585-3p	ENST00000528973	3026	ENST00000430647&1510&13	ENST00000443346&524&11	ENST00000544012&35&12	ENST00000564735&35&12	ENST00000585443&35&12	ENST00000419892&1504&12	ENST00000460133&4345&11	ENST00000304567&2930&13	ENST00000360566&2930&13	ENST00000311956&2539&13	ENST00000355452&2844&11	ENST00000221307&2987&11	ENST00000430138&511&11	ENST00000437104&38&12	ENST00000460376&1832&13	ENST00000329665&2818&13	ENST00000461452&1777&11	ENST00000471694&1799&12	ENST00000493745&52&12	ENST00000439632&3846&11	ENST00000558121&2002&11	ENST00000558181&3861&11	ENST00000261520&4006&11	ENST00000357137&5347&12	ENST00000573087&740&503	ENST00000573968&580&503	ENST00000255759&815&503	ENST00000369291&1787&12	ENST00000601579&604&13	ENST00000538868&2498&11	ENST00000477641&52&12	ENST00000595464&1844&10	ENST00000552190&84&10	ENST00000549698&84&10
47	GGGATTACAGGCATGCACC	2	ENST00000366261	52	hsa-miR-1273a	ENST00000366261	148	ENST00000399539&624&10	ENST00000481349&2449&10	ENST00000579530&492&10	ENST00000359047&1460&10	ENST00000493181&5597&10	ENST00000547066&425&10	ENST00000547581&624&10	ENST00000311765&3891&16	ENST00000274242&3150&10	ENST00000519926&834&10	ENST00000420913&1832&10	ENST00000480046&1158&10	ENST00000262432&1275&10	ENST00000482555&1481&10	ENST00000378592&1696&10	ENST00000477853&6524&10	ENST00000375077&2653&10	ENST00000343933&2829&10	ENST00000462086&492&10	ENST00000519830&132&16	ENST00000287957&2553&10	ENST00000600960&2785&10	ENST00000450849&3188&10	ENST00000244763&7440&10	ENST00000488733&1601&10	ENST00000597922&365&10	ENST00000261560&2208&10	ENST00000557114&182&10	ENST00000514871&2466&10	ENST00000563727&2366&10	ENST00000495034&1863&10	ENST00000461790&800&10	ENST00000475127&542&10	ENST00000570734&2175&10	ENST00000433028&719&10	ENST00000595369&444&10	ENST00000338356&2834&10	ENST00000551568&2848&10	ENST00000436236&942&1731	ENST00000423527&1554&1731	ENST00000453168&1778&1731
47	GGGATTACAGGCATGCACC	2	ENST00000553547	231	hsa-miR-1273d	ENST00000553547	274	ENST00000399539&624&10	ENST00000481349&2449&10	ENST00000579530&492&10	ENST00000359047&1460&10	ENST00000493181&5597&10	ENST00000547066&425&10	ENST00000547581&624&10	ENST00000311765&3891&16	ENST00000274242&3150&10	ENST00000519926&834&10	ENST00000420913&1832&10	ENST00000480046&1158&10	ENST00000262432&1275&10	ENST00000482555&1481&10	ENST00000378592&1696&10	ENST00000477853&6524&10	ENST00000375077&2653&10	ENST00000343933&2829&10	ENST00000462086&492&10	ENST00000519830&132&16	ENST00000287957&2553&10	ENST00000600960&2785&10	ENST00000450849&3188&10	ENST00000244763&7440&10	ENST00000488733&1601&10	ENST00000597922&365&10	ENST00000261560&2208&10	ENST00000557114&182&10	ENST00000514871&2466&10	ENST00000563727&2366&10	ENST00000495034&1863&10	ENST00000461790&800&10	ENST00000475127&542&10	ENST00000570734&2175&10	ENST00000433028&719&10	ENST00000595369&444&10	ENST00000338356&2834&10	ENST00000551568&2848&10	ENST00000436236&942&1731	ENST00000423527&1554&1731	ENST00000453168&1778&1731
47	GGGATTACAGGCATGCACC	2	ENST00000359680	1588	hsa-miR-1273e	ENST00000359680	1625	ENST00000399539&624&10	ENST00000481349&2449&10	ENST00000579530&492&10	ENST00000359047&1460&10	ENST00000493181&5597&10	ENST00000547066&425&10	ENST00000547581&624&10	ENST00000311765&3891&16	ENST00000274242&3150&10	ENST00000519926&834&10	ENST00000420913&1832&10	ENST00000480046&1158&10	ENST00000262432&1275&10	ENST00000482555&1481&10	ENST00000378592&1696&10	ENST00000477853&6524&10	ENST00000375077&2653&10	ENST00000343933&2829&10	ENST00000462086&492&10	ENST00000519830&132&16	ENST00000287957&2553&10	ENST00000600960&2785&10	ENST00000450849&3188&10	ENST00000244763&7440&10	ENST00000488733&1601&10	ENST00000597922&365&10	ENST00000261560&2208&10	ENST00000557114&182&10	ENST00000514871&2466&10	ENST00000563727&2366&10	ENST00000495034&1863&10	ENST00000461790&800&10	ENST00000475127&542&10	ENST00000570734&2175&10	ENST00000433028&719&10	ENST00000595369&444&10	ENST00000338356&2834&10	ENST00000551568&2848&10	ENST00000436236&942&1731	ENST00000423527&1554&1731	ENST00000453168&1778&1731
47	GGGATTACAGGCATGCACC	2	ENST00000453655	1751	hsa-miR-1273e	ENST00000453655	1788	ENST00000399539&624&10	ENST00000481349&2449&10	ENST00000579530&492&10	ENST00000359047&1460&10	ENST00000493181&5597&10	ENST00000547066&425&10	ENST00000547581&624&10	ENST00000311765&3891&16	ENST00000274242&3150&10	ENST00000519926&834&10	ENST00000420913&1832&10	ENST00000480046&1158&10	ENST00000262432&1275&10	ENST00000482555&1481&10	ENST00000378592&1696&10	ENST00000477853&6524&10	ENST00000375077&2653&10	ENST00000343933&2829&10	ENST00000462086&492&10	ENST00000519830&132&16	ENST00000287957&2553&10	ENST00000600960&2785&10	ENST00000450849&3188&10	ENST00000244763&7440&10	ENST00000488733&1601&10	ENST00000597922&365&10	ENST00000261560&2208&10	ENST00000557114&182&10	ENST00000514871&2466&10	ENST00000563727&2366&10	ENST00000495034&1863&10	ENST00000461790&800&10	ENST00000475127&542&10	ENST00000570734&2175&10	ENST00000433028&719&10	ENST00000595369&444&10	ENST00000338356&2834&10	ENST00000551568&2848&10	ENST00000436236&942&1731	ENST00000423527&1554&1731	ENST00000453168&1778&1731
47	GGGATTACAGGCATGCACC	2	ENST00000380579	1651	hsa-miR-1273e	ENST00000380579	1688	ENST00000399539&624&10	ENST00000481349&2449&10	ENST00000579530&492&10	ENST00000359047&1460&10	ENST00000493181&5597&10	ENST00000547066&425&10	ENST00000547581&624&10	ENST00000311765&3891&16	ENST00000274242&3150&10	ENST00000519926&834&10	ENST00000420913&1832&10	ENST00000480046&1158&10	ENST00000262432&1275&10	ENST00000482555&1481&10	ENST00000378592&1696&10	ENST00000477853&6524&10	ENST00000375077&2653&10	ENST00000343933&2829&10	ENST00000462086&492&10	ENST00000519830&132&16	ENST00000287957&2553&10	ENST00000600960&2785&10	ENST00000450849&3188&10	ENST00000244763&7440&10	ENST00000488733&1601&10	ENST00000597922&365&10	ENST00000261560&2208&10	ENST00000557114&182&10	ENST00000514871&2466&10	ENST00000563727&2366&10	ENST00000495034&1863&10	ENST00000461790&800&10	ENST00000475127&542&10	ENST00000570734&2175&10	ENST00000433028&719&10	ENST00000595369&444&10	ENST00000338356&2834&10	ENST00000551568&2848&10	ENST00000436236&942&1731	ENST00000423527&1554&1731	ENST00000453168&1778&1731
47	GGGATTACAGGCATGCACC	2	ENST00000595753	4232	hsa-miR-1273g-3p	ENST00000595753	4313	ENST00000399539&624&10	ENST00000481349&2449&10	ENST00000579530&492&10	ENST00000359047&1460&10	ENST00000493181&5597&10	ENST00000547066&425&10	ENST00000547581&624&10	ENST00000311765&3891&16	ENST00000274242&3150&10	ENST00000519926&834&10	ENST00000420913&1832&10	ENST00000480046&1158&10	ENST00000262432&1275&10	ENST00000482555&1481&10	ENST00000378592&1696&10	ENST00000477853&6524&10	ENST00000375077&2653&10	ENST00000343933&2829&10	ENST00000462086&492&10	ENST00000519830&132&16	ENST00000287957&2553&10	ENST00000600960&2785&10	ENST00000450849&3188&10	ENST00000244763&7440&10	ENST00000488733&1601&10	ENST00000597922&365&10	ENST00000261560&2208&10	ENST00000557114&182&10	ENST00000514871&2466&10	ENST00000563727&2366&10	ENST00000495034&1863&10	ENST00000461790&800&10	ENST00000475127&542&10	ENST00000570734&2175&10	ENST00000433028&719&10	ENST00000595369&444&10	ENST00000338356&2834&10	ENST00000551568&2848&10	ENST00000436236&942&1731	ENST00000423527&1554&1731	ENST00000453168&1778&1731
47	GGGATTACAGGCATGCACC	2	ENST00000464478	391	hsa-miR-1273g-3p	ENST00000464478	472	ENST00000399539&624&10	ENST00000481349&2449&10	ENST00000579530&492&10	ENST00000359047&1460&10	ENST00000493181&5597&10	ENST00000547066&425&10	ENST00000547581&624&10	ENST00000311765&3891&16	ENST00000274242&3150&10	ENST00000519926&834&10	ENST00000420913&1832&10	ENST00000480046&1158&10	ENST00000262432&1275&10	ENST00000482555&1481&10	ENST00000378592&1696&10	ENST00000477853&6524&10	ENST00000375077&2653&10	ENST00000343933&2829&10	ENST00000462086&492&10	ENST00000519830&132&16	ENST00000287957&2553&10	ENST00000600960&2785&10	ENST00000450849&3188&10	ENST00000244763&7440&10	ENST00000488733&1601&10	ENST00000597922&365&10	ENST00000261560&2208&10	ENST00000557114&182&10	ENST00000514871&2466&10	ENST00000563727&2366&10	ENST00000495034&1863&10	ENST00000461790&800&10	ENST00000475127&542&10	ENST00000570734&2175&10	ENST00000433028&719&10	ENST00000595369&444&10	ENST00000338356&2834&10	ENST00000551568&2848&10	ENST00000436236&942&1731	ENST00000423527&1554&1731	ENST00000453168&1778&1731
47	GGGATTACAGGCATGCACC	2	ENST00000371727	606	hsa-miR-1273g-3p	ENST00000371727	687	ENST00000399539&624&10	ENST00000481349&2449&10	ENST00000579530&492&10	ENST00000359047&1460&10	ENST00000493181&5597&10	ENST00000547066&425&10	ENST00000547581&624&10	ENST00000311765&3891&16	ENST00000274242&3150&10	ENST00000519926&834&10	ENST00000420913&1832&10	ENST00000480046&1158&10	ENST00000262432&1275&10	ENST00000482555&1481&10	ENST00000378592&1696&10	ENST00000477853&6524&10	ENST00000375077&2653&10	ENST00000343933&2829&10	ENST00000462086&492&10	ENST00000519830&132&16	ENST00000287957&2553&10	ENST00000600960&2785&10	ENST00000450849&3188&10	ENST00000244763&7440&10	ENST00000488733&1601&10	ENST00000597922&365&10	ENST00000261560&2208&10	ENST00000557114&182&10	ENST00000514871&2466&10	ENST00000563727&2366&10	ENST00000495034&1863&10	ENST00000461790&800&10	ENST00000475127&542&10	ENST00000570734&2175&10	ENST00000433028&719&10	ENST00000595369&444&10	ENST00000338356&2834&10	ENST00000551568&2848&10	ENST00000436236&942&1731	ENST00000423527&1554&1731	ENST00000453168&1778&1731
48	ATGTTGGCCAGGCTGGTCTC	2	ENST00000553547	231	hsa-miR-1273d	ENST00000553547	341	ENST00000585757&297&25	ENST00000354425&207&12	ENST00000455607&682&10	ENST00000584831&819&12	ENST00000584831&1404&10	ENST00000584831&2416&12	ENST00000420877&2437&12	ENST00000564629&2083&12	ENST00000565152&628&18	ENST00000586503&339&10	ENST00000597346&78821&10	ENST00000597346&79583&12	ENST00000524309&321&25	ENST00000416930&226&12	ENST00000574716&1518&10	ENST00000584157&755&25	ENST00000414544&2037&12	ENST00000583062&1991&10	ENST00000424663&607&25	ENST00000437833&1029&12	ENST00000422306&232&12	ENST00000581621&4273&12	ENST00000590284&306&25	ENST00000393978&631&12	ENST00000559989&4423&25	ENST00000331301&1979&10	ENST00000446628&2837&25	ENST00000523153&2766&12	ENST00000223076&540&25	ENST00000355177&73&25	ENST00000485225&1813&12	ENST00000411857&7104&25	ENST00000596737&2117&12	ENST00000596737&2351&12	ENST00000596577&2040&25	ENST00000573265&744&12	ENST00000577109&1141&12	ENST00000571672&1121&12	ENST00000575418&1105&12	ENST00000573012&1220&12	ENST00000573545&203&10	ENST00000576901&1273&25
48	ATGTTGGCCAGGCTGGTCTC	2	ENST00000319637	1316	hsa-miR-1273e	ENST00000319637	1420	ENST00000585757&297&25	ENST00000354425&207&12	ENST00000455607&682&10	ENST00000584831&819&12	ENST00000584831&1404&10	ENST00000584831&2416&12	ENST00000420877&2437&12	ENST00000564629&2083&12	ENST00000565152&628&18	ENST00000586503&339&10	ENST00000597346&78821&10	ENST00000597346&79583&12	ENST00000524309&321&25	ENST00000416930&226&12	ENST00000574716&1518&10	ENST00000584157&755&25	ENST00000414544&2037&12	ENST00000583062&1991&10	ENST00000424663&607&25	ENST00000437833&1029&12	ENST00000422306&232&12	ENST00000581621&4273&12	ENST00000590284&306&25	ENST00000393978&631&12	ENST00000559989&4423&25	ENST00000331301&1979&10	ENST00000446628&2837&25	ENST00000523153&2766&12	ENST00000223076&540&25	ENST00000355177&73&25	ENST00000485225&1813&12	ENST00000411857&7104&25	ENST00000596737&2117&12	ENST00000596737&2351&12	ENST00000596577&2040&25	ENST00000573265&744&12	ENST00000577109&1141&12	ENST00000571672&1121&12	ENST00000575418&1105&12	ENST00000573012&1220&12	ENST00000573545&203&10	ENST00000576901&1273&25
48	ATGTTGGCCAGGCTGGTCTC	2	ENST00000500236	623	hsa-miR-1273e	ENST00000500236	729	ENST00000585757&297&25	ENST00000354425&207&12	ENST00000455607&682&10	ENST00000584831&819&12	ENST00000584831&1404&10	ENST00000584831&2416&12	ENST00000420877&2437&12	ENST00000564629&2083&12	ENST00000565152&628&18	ENST00000586503&339&10	ENST00000597346&78821&10	ENST00000597346&79583&12	ENST00000524309&321&25	ENST00000416930&226&12	ENST00000574716&1518&10	ENST00000584157&755&25	ENST00000414544&2037&12	ENST00000583062&1991&10	ENST00000424663&607&25	ENST00000437833&1029&12	ENST00000422306&232&12	ENST00000581621&4273&12	ENST00000590284&306&25	ENST00000393978&631&12	ENST00000559989&4423&25	ENST00000331301&1979&10	ENST00000446628&2837&25	ENST00000523153&2766&12	ENST00000223076&540&25	ENST00000355177&73&25	ENST00000485225&1813&12	ENST00000411857&7104&25	ENST00000596737&2117&12	ENST00000596737&2351&12	ENST00000596577&2040&25	ENST00000573265&744&12	ENST00000577109&1141&12	ENST00000571672&1121&12	ENST00000575418&1105&12	ENST00000573012&1220&12	ENST00000573545&203&10	ENST00000576901&1273&25
48	ATGTTGGCCAGGCTGGTCTC	2	ENST00000489288	1033	hsa-miR-1273e	ENST00000489288	1139	ENST00000585757&297&25	ENST00000354425&207&12	ENST00000455607&682&10	ENST00000584831&819&12	ENST00000584831&1404&10	ENST00000584831&2416&12	ENST00000420877&2437&12	ENST00000564629&2083&12	ENST00000565152&628&18	ENST00000586503&339&10	ENST00000597346&78821&10	ENST00000597346&79583&12	ENST00000524309&321&25	ENST00000416930&226&12	ENST00000574716&1518&10	ENST00000584157&755&25	ENST00000414544&2037&12	ENST00000583062&1991&10	ENST00000424663&607&25	ENST00000437833&1029&12	ENST00000422306&232&12	ENST00000581621&4273&12	ENST00000590284&306&25	ENST00000393978&631&12	ENST00000559989&4423&25	ENST00000331301&1979&10	ENST00000446628&2837&25	ENST00000523153&2766&12	ENST00000223076&540&25	ENST00000355177&73&25	ENST00000485225&1813&12	ENST00000411857&7104&25	ENST00000596737&2117&12	ENST00000596737&2351&12	ENST00000596577&2040&25	ENST00000573265&744&12	ENST00000577109&1141&12	ENST00000571672&1121&12	ENST00000575418&1105&12	ENST00000573012&1220&12	ENST00000573545&203&10	ENST00000576901&1273&25
48	ATGTTGGCCAGGCTGGTCTC	2	ENST00000464682	788	hsa-miR-1273e	ENST00000464682	894	ENST00000585757&297&25	ENST00000354425&207&12	ENST00000455607&682&10	ENST00000584831&819&12	ENST00000584831&1404&10	ENST00000584831&2416&12	ENST00000420877&2437&12	ENST00000564629&2083&12	ENST00000565152&628&18	ENST00000586503&339&10	ENST00000597346&78821&10	ENST00000597346&79583&12	ENST00000524309&321&25	ENST00000416930&226&12	ENST00000574716&1518&10	ENST00000584157&755&25	ENST00000414544&2037&12	ENST00000583062&1991&10	ENST00000424663&607&25	ENST00000437833&1029&12	ENST00000422306&232&12	ENST00000581621&4273&12	ENST00000590284&306&25	ENST00000393978&631&12	ENST00000559989&4423&25	ENST00000331301&1979&10	ENST00000446628&2837&25	ENST00000523153&2766&12	ENST00000223076&540&25	ENST00000355177&73&25	ENST00000485225&1813&12	ENST00000411857&7104&25	ENST00000596737&2117&12	ENST00000596737&2351&12	ENST00000596577&2040&25	ENST00000573265&744&12	ENST00000577109&1141&12	ENST00000571672&1121&12	ENST00000575418&1105&12	ENST00000573012&1220&12	ENST00000573545&203&10	ENST00000576901&1273&25
48	ATGTTGGCCAGGCTGGTCTC	2	ENST00000461997	1007	hsa-miR-1273e	ENST00000461997	1113	ENST00000585757&297&25	ENST00000354425&207&12	ENST00000455607&682&10	ENST00000584831&819&12	ENST00000584831&1404&10	ENST00000584831&2416&12	ENST00000420877&2437&12	ENST00000564629&2083&12	ENST00000565152&628&18	ENST00000586503&339&10	ENST00000597346&78821&10	ENST00000597346&79583&12	ENST00000524309&321&25	ENST00000416930&226&12	ENST00000574716&1518&10	ENST00000584157&755&25	ENST00000414544&2037&12	ENST00000583062&1991&10	ENST00000424663&607&25	ENST00000437833&1029&12	ENST00000422306&232&12	ENST00000581621&4273&12	ENST00000590284&306&25	ENST00000393978&631&12	ENST00000559989&4423&25	ENST00000331301&1979&10	ENST00000446628&2837&25	ENST00000523153&2766&12	ENST00000223076&540&25	ENST00000355177&73&25	ENST00000485225&1813&12	ENST00000411857&7104&25	ENST00000596737&2117&12	ENST00000596737&2351&12	ENST00000596577&2040&25	ENST00000573265&744&12	ENST00000577109&1141&12	ENST00000571672&1121&12	ENST00000575418&1105&12	ENST00000573012&1220&12	ENST00000573545&203&10	ENST00000576901&1273&25
48	ATGTTGGCCAGGCTGGTCTC	2	ENST00000586025	2354	hsa-miR-1273g-3p	ENST00000586025	2023	ENST00000585757&297&25	ENST00000354425&207&12	ENST00000455607&682&10	ENST00000584831&819&12	ENST00000584831&1404&10	ENST00000584831&2416&12	ENST00000420877&2437&12	ENST00000564629&2083&12	ENST00000565152&628&18	ENST00000586503&339&10	ENST00000597346&78821&10	ENST00000597346&79583&12	ENST00000524309&321&25	ENST00000416930&226&12	ENST00000574716&1518&10	ENST00000584157&755&25	ENST00000414544&2037&12	ENST00000583062&1991&10	ENST00000424663&607&25	ENST00000437833&1029&12	ENST00000422306&232&12	ENST00000581621&4273&12	ENST00000590284&306&25	ENST00000393978&631&12	ENST00000559989&4423&25	ENST00000331301&1979&10	ENST00000446628&2837&25	ENST00000523153&2766&12	ENST00000223076&540&25	ENST00000355177&73&25	ENST00000485225&1813&12	ENST00000411857&7104&25	ENST00000596737&2117&12	ENST00000596737&2351&12	ENST00000596577&2040&25	ENST00000573265&744&12	ENST00000577109&1141&12	ENST00000571672&1121&12	ENST00000575418&1105&12	ENST00000573012&1220&12	ENST00000573545&203&10	ENST00000576901&1273&25
48	ATGTTGGCCAGGCTGGTCTC	2	ENST00000321764	2749	hsa-miR-1273f	ENST00000321764	2865	ENST00000585757&297&25	ENST00000354425&207&12	ENST00000455607&682&10	ENST00000584831&819&12	ENST00000584831&1404&10	ENST00000584831&2416&12	ENST00000420877&2437&12	ENST00000564629&2083&12	ENST00000565152&628&18	ENST00000586503&339&10	ENST00000597346&78821&10	ENST00000597346&79583&12	ENST00000524309&321&25	ENST00000416930&226&12	ENST00000574716&1518&10	ENST00000584157&755&25	ENST00000414544&2037&12	ENST00000583062&1991&10	ENST00000424663&607&25	ENST00000437833&1029&12	ENST00000422306&232&12	ENST00000581621&4273&12	ENST00000590284&306&25	ENST00000393978&631&12	ENST00000559989&4423&25	ENST00000331301&1979&10	ENST00000446628&2837&25	ENST00000523153&2766&12	ENST00000223076&540&25	ENST00000355177&73&25	ENST00000485225&1813&12	ENST00000411857&7104&25	ENST00000596737&2117&12	ENST00000596737&2351&12	ENST00000596577&2040&25	ENST00000573265&744&12	ENST00000577109&1141&12	ENST00000571672&1121&12	ENST00000575418&1105&12	ENST00000573012&1220&12	ENST00000573545&203&10	ENST00000576901&1273&25
48	ATGTTGGCCAGGCTGGTCTC	2	ENST00000592861	201	hsa-miR-1273f	ENST00000592861	318	ENST00000585757&297&25	ENST00000354425&207&12	ENST00000455607&682&10	ENST00000584831&819&12	ENST00000584831&1404&10	ENST00000584831&2416&12	ENST00000420877&2437&12	ENST00000564629&2083&12	ENST00000565152&628&18	ENST00000586503&339&10	ENST00000597346&78821&10	ENST00000597346&79583&12	ENST00000524309&321&25	ENST00000416930&226&12	ENST00000574716&1518&10	ENST00000584157&755&25	ENST00000414544&2037&12	ENST00000583062&1991&10	ENST00000424663&607&25	ENST00000437833&1029&12	ENST00000422306&232&12	ENST00000581621&4273&12	ENST00000590284&306&25	ENST00000393978&631&12	ENST00000559989&4423&25	ENST00000331301&1979&10	ENST00000446628&2837&25	ENST00000523153&2766&12	ENST00000223076&540&25	ENST00000355177&73&25	ENST00000485225&1813&12	ENST00000411857&7104&25	ENST00000596737&2117&12	ENST00000596737&2351&12	ENST00000596577&2040&25	ENST00000573265&744&12	ENST00000577109&1141&12	ENST00000571672&1121&12	ENST00000575418&1105&12	ENST00000573012&1220&12	ENST00000573545&203&10	ENST00000576901&1273&25
48	ATGTTGGCCAGGCTGGTCTC	2	ENST00000480612	266	hsa-miR-1273f	ENST00000480612	379	ENST00000585757&297&25	ENST00000354425&207&12	ENST00000455607&682&10	ENST00000584831&819&12	ENST00000584831&1404&10	ENST00000584831&2416&12	ENST00000420877&2437&12	ENST00000564629&2083&12	ENST00000565152&628&18	ENST00000586503&339&10	ENST00000597346&78821&10	ENST00000597346&79583&12	ENST00000524309&321&25	ENST00000416930&226&12	ENST00000574716&1518&10	ENST00000584157&755&25	ENST00000414544&2037&12	ENST00000583062&1991&10	ENST00000424663&607&25	ENST00000437833&1029&12	ENST00000422306&232&12	ENST00000581621&4273&12	ENST00000590284&306&25	ENST00000393978&631&12	ENST00000559989&4423&25	ENST00000331301&1979&10	ENST00000446628&2837&25	ENST00000523153&2766&12	ENST00000223076&540&25	ENST00000355177&73&25	ENST00000485225&1813&12	ENST00000411857&7104&25	ENST00000596737&2117&12	ENST00000596737&2351&12	ENST00000596577&2040&25	ENST00000573265&744&12	ENST00000577109&1141&12	ENST00000571672&1121&12	ENST00000575418&1105&12	ENST00000573012&1220&12	ENST00000573545&203&10	ENST00000576901&1273&25
48	ATGTTGGCCAGGCTGGTCTC	2	ENST00000519692	2175	hsa-miR-1273g-3p	ENST00000519692	2324	ENST00000585757&297&25	ENST00000354425&207&12	ENST00000455607&682&10	ENST00000584831&819&12	ENST00000584831&1404&10	ENST00000584831&2416&12	ENST00000420877&2437&12	ENST00000564629&2083&12	ENST00000565152&628&18	ENST00000586503&339&10	ENST00000597346&78821&10	ENST00000597346&79583&12	ENST00000524309&321&25	ENST00000416930&226&12	ENST00000574716&1518&10	ENST00000584157&755&25	ENST00000414544&2037&12	ENST00000583062&1991&10	ENST00000424663&607&25	ENST00000437833&1029&12	ENST00000422306&232&12	ENST00000581621&4273&12	ENST00000590284&306&25	ENST00000393978&631&12	ENST00000559989&4423&25	ENST00000331301&1979&10	ENST00000446628&2837&25	ENST00000523153&2766&12	ENST00000223076&540&25	ENST00000355177&73&25	ENST00000485225&1813&12	ENST00000411857&7104&25	ENST00000596737&2117&12	ENST00000596737&2351&12	ENST00000596577&2040&25	ENST00000573265&744&12	ENST00000577109&1141&12	ENST00000571672&1121&12	ENST00000575418&1105&12	ENST00000573012&1220&12	ENST00000573545&203&10	ENST00000576901&1273&25
48	ATGTTGGCCAGGCTGGTCTC	2	ENST00000465342	3042	hsa-miR-1273g-3p	ENST00000465342	3190	ENST00000585757&297&25	ENST00000354425&207&12	ENST00000455607&682&10	ENST00000584831&819&12	ENST00000584831&1404&10	ENST00000584831&2416&12	ENST00000420877&2437&12	ENST00000564629&2083&12	ENST00000565152&628&18	ENST00000586503&339&10	ENST00000597346&78821&10	ENST00000597346&79583&12	ENST00000524309&321&25	ENST00000416930&226&12	ENST00000574716&1518&10	ENST00000584157&755&25	ENST00000414544&2037&12	ENST00000583062&1991&10	ENST00000424663&607&25	ENST00000437833&1029&12	ENST00000422306&232&12	ENST00000581621&4273&12	ENST00000590284&306&25	ENST00000393978&631&12	ENST00000559989&4423&25	ENST00000331301&1979&10	ENST00000446628&2837&25	ENST00000523153&2766&12	ENST00000223076&540&25	ENST00000355177&73&25	ENST00000485225&1813&12	ENST00000411857&7104&25	ENST00000596737&2117&12	ENST00000596737&2351&12	ENST00000596577&2040&25	ENST00000573265&744&12	ENST00000577109&1141&12	ENST00000571672&1121&12	ENST00000575418&1105&12	ENST00000573012&1220&12	ENST00000573545&203&10	ENST00000576901&1273&25
48	ATGTTGGCCAGGCTGGTCTC	2	ENST00000595753	4232	hsa-miR-1273g-3p	ENST00000595753	4381	ENST00000585757&297&25	ENST00000354425&207&12	ENST00000455607&682&10	ENST00000584831&819&12	ENST00000584831&1404&10	ENST00000584831&2416&12	ENST00000420877&2437&12	ENST00000564629&2083&12	ENST00000565152&628&18	ENST00000586503&339&10	ENST00000597346&78821&10	ENST00000597346&79583&12	ENST00000524309&321&25	ENST00000416930&226&12	ENST00000574716&1518&10	ENST00000584157&755&25	ENST00000414544&2037&12	ENST00000583062&1991&10	ENST00000424663&607&25	ENST00000437833&1029&12	ENST00000422306&232&12	ENST00000581621&4273&12	ENST00000590284&306&25	ENST00000393978&631&12	ENST00000559989&4423&25	ENST00000331301&1979&10	ENST00000446628&2837&25	ENST00000523153&2766&12	ENST00000223076&540&25	ENST00000355177&73&25	ENST00000485225&1813&12	ENST00000411857&7104&25	ENST00000596737&2117&12	ENST00000596737&2351&12	ENST00000596577&2040&25	ENST00000573265&744&12	ENST00000577109&1141&12	ENST00000571672&1121&12	ENST00000575418&1105&12	ENST00000573012&1220&12	ENST00000573545&203&10	ENST00000576901&1273&25
48	ATGTTGGCCAGGCTGGTCTC	2	ENST00000396789	327	hsa-miR-1273g-3p	ENST00000396789	475	ENST00000585757&297&25	ENST00000354425&207&12	ENST00000455607&682&10	ENST00000584831&819&12	ENST00000584831&1404&10	ENST00000584831&2416&12	ENST00000420877&2437&12	ENST00000564629&2083&12	ENST00000565152&628&18	ENST00000586503&339&10	ENST00000597346&78821&10	ENST00000597346&79583&12	ENST00000524309&321&25	ENST00000416930&226&12	ENST00000574716&1518&10	ENST00000584157&755&25	ENST00000414544&2037&12	ENST00000583062&1991&10	ENST00000424663&607&25	ENST00000437833&1029&12	ENST00000422306&232&12	ENST00000581621&4273&12	ENST00000590284&306&25	ENST00000393978&631&12	ENST00000559989&4423&25	ENST00000331301&1979&10	ENST00000446628&2837&25	ENST00000523153&2766&12	ENST00000223076&540&25	ENST00000355177&73&25	ENST00000485225&1813&12	ENST00000411857&7104&25	ENST00000596737&2117&12	ENST00000596737&2351&12	ENST00000596577&2040&25	ENST00000573265&744&12	ENST00000577109&1141&12	ENST00000571672&1121&12	ENST00000575418&1105&12	ENST00000573012&1220&12	ENST00000573545&203&10	ENST00000576901&1273&25
48	ATGTTGGCCAGGCTGGTCTC	2	ENST00000322989	1236	hsa-miR-1273g-3p	ENST00000322989	1383	ENST00000585757&297&25	ENST00000354425&207&12	ENST00000455607&682&10	ENST00000584831&819&12	ENST00000584831&1404&10	ENST00000584831&2416&12	ENST00000420877&2437&12	ENST00000564629&2083&12	ENST00000565152&628&18	ENST00000586503&339&10	ENST00000597346&78821&10	ENST00000597346&79583&12	ENST00000524309&321&25	ENST00000416930&226&12	ENST00000574716&1518&10	ENST00000584157&755&25	ENST00000414544&2037&12	ENST00000583062&1991&10	ENST00000424663&607&25	ENST00000437833&1029&12	ENST00000422306&232&12	ENST00000581621&4273&12	ENST00000590284&306&25	ENST00000393978&631&12	ENST00000559989&4423&25	ENST00000331301&1979&10	ENST00000446628&2837&25	ENST00000523153&2766&12	ENST00000223076&540&25	ENST00000355177&73&25	ENST00000485225&1813&12	ENST00000411857&7104&25	ENST00000596737&2117&12	ENST00000596737&2351&12	ENST00000596577&2040&25	ENST00000573265&744&12	ENST00000577109&1141&12	ENST00000571672&1121&12	ENST00000575418&1105&12	ENST00000573012&1220&12	ENST00000573545&203&10	ENST00000576901&1273&25
48	ATGTTGGCCAGGCTGGTCTC	2	ENST00000492597	258	hsa-miR-1273g-3p	ENST00000492597	406	ENST00000585757&297&25	ENST00000354425&207&12	ENST00000455607&682&10	ENST00000584831&819&12	ENST00000584831&1404&10	ENST00000584831&2416&12	ENST00000420877&2437&12	ENST00000564629&2083&12	ENST00000565152&628&18	ENST00000586503&339&10	ENST00000597346&78821&10	ENST00000597346&79583&12	ENST00000524309&321&25	ENST00000416930&226&12	ENST00000574716&1518&10	ENST00000584157&755&25	ENST00000414544&2037&12	ENST00000583062&1991&10	ENST00000424663&607&25	ENST00000437833&1029&12	ENST00000422306&232&12	ENST00000581621&4273&12	ENST00000590284&306&25	ENST00000393978&631&12	ENST00000559989&4423&25	ENST00000331301&1979&10	ENST00000446628&2837&25	ENST00000523153&2766&12	ENST00000223076&540&25	ENST00000355177&73&25	ENST00000485225&1813&12	ENST00000411857&7104&25	ENST00000596737&2117&12	ENST00000596737&2351&12	ENST00000596577&2040&25	ENST00000573265&744&12	ENST00000577109&1141&12	ENST00000571672&1121&12	ENST00000575418&1105&12	ENST00000573012&1220&12	ENST00000573545&203&10	ENST00000576901&1273&25
49	TGATCCACCCACCTCGGCCTCCC	3	ENST00000481579	1847	hsa-miR-1273d	ENST00000481579	1993	ENST00000428200&241&13	ENST00000470730&2038&13	ENST00000467157&163&13	ENST00000512524&1160&13	ENST00000527076&807&13	ENST00000283285&3750&13	ENST00000352690&3741&13	ENST00000586409&3512&13	ENST00000485714&2746&13	ENST00000485714&1156&13	ENST00000219478&3394&13	ENST00000398808&504&13	ENST00000326654&2379&13
49	TGATCCACCCACCTCGGCCTCCC	3	ENST00000329468	4698	hsa-miR-1273e	ENST00000329468	4839	ENST00000428200&241&13	ENST00000470730&2038&13	ENST00000467157&163&13	ENST00000512524&1160&13	ENST00000527076&807&13	ENST00000283285&3750&13	ENST00000352690&3741&13	ENST00000586409&3512&13	ENST00000485714&2746&13	ENST00000485714&1156&13	ENST00000219478&3394&13	ENST00000398808&504&13	ENST00000326654&2379&13
50	GCTCGGGAGGCTGAGGCAGGA	2	ENST00000562760	1006	hsa-miR-5096	ENST00000562760	1078	ENST00000601343&686&11
51	GGCAACAGAGTGAGACCCTGTCT	2	ENST00000552774	104	hsa-miR-5585-3p	ENST00000552774	194	ENST00000601613&1232&21	ENST00000307522&2594&11	ENST00000585150&1442&21	ENST00000500025&1462&13	ENST00000504853&429&503	ENST00000344248&2535&13	ENST00000309166&2945&503
51	GGCAACAGAGTGAGACCCTGTCT	2	ENST00000548855	4620	hsa-miR-5585-3p	ENST00000548855	4710	ENST00000601613&1232&21	ENST00000307522&2594&11	ENST00000585150&1442&21	ENST00000500025&1462&13	ENST00000504853&429&503	ENST00000344248&2535&13	ENST00000309166&2945&503
52	GTTGCTCAGGCTGGAGTGCAGTGGTG	3	ENST00000559920	1086	hsa-miR-1273g-3p	ENST00000559920	1070	ENST00000373836&3787&16	ENST00000373839&3804&16	ENST00000546474&13357&16	ENST00000586372&3596&16	ENST00000462067&932&16	ENST00000488606&1445&16
52	GTTGCTCAGGCTGGAGTGCAGTGGTG	3	ENST00000462519	2298	hsa-miR-1273g-3p	ENST00000462519	2282	ENST00000373836&3787&16	ENST00000373839&3804&16	ENST00000546474&13357&16	ENST00000586372&3596&16	ENST00000462067&932&16	ENST00000488606&1445&16
52	GTTGCTCAGGCTGGAGTGCAGTGGTG	3	ENST00000315901	157	hsa-miR-1273g-3p	ENST00000315901	141	ENST00000373836&3787&16	ENST00000373839&3804&16	ENST00000546474&13357&16	ENST00000586372&3596&16	ENST00000462067&932&16	ENST00000488606&1445&16
52	GTTGCTCAGGCTGGAGTGCAGTGGTG	3	ENST00000312234	2139	hsa-miR-1273g-3p	ENST00000312234	2123	ENST00000373836&3787&16	ENST00000373839&3804&16	ENST00000546474&13357&16	ENST00000586372&3596&16	ENST00000462067&932&16	ENST00000488606&1445&16
52	GTTGCTCAGGCTGGAGTGCAGTGGTG	3	ENST00000526451	2013	hsa-miR-1273g-3p	ENST00000526451	1997	ENST00000373836&3787&16	ENST00000373839&3804&16	ENST00000546474&13357&16	ENST00000586372&3596&16	ENST00000462067&932&16	ENST00000488606&1445&16
52	GTTGCTCAGGCTGGAGTGCAGTGGTG	3	ENST00000487297	147	hsa-miR-1273g-3p	ENST00000487297	131	ENST00000373836&3787&16	ENST00000373839&3804&16	ENST00000546474&13357&16	ENST00000586372&3596&16	ENST00000462067&932&16	ENST00000488606&1445&16
52	GTTGCTCAGGCTGGAGTGCAGTGGTG	3	ENST00000339296	4827	hsa-miR-1273g-3p	ENST00000339296	4811	ENST00000373836&3787&16	ENST00000373839&3804&16	ENST00000546474&13357&16	ENST00000586372&3596&16	ENST00000462067&932&16	ENST00000488606&1445&16
53	TCACCTGAGGTCAGGAGT	24	ENST00000370132	3039	hsa-miR-1285-5p	ENST00000370132	3132	ENST00000566036&231&11	ENST00000450909&1570&11	ENST00000512428&1324&11	ENST00000366153&82&11	ENST00000565256&964&11	ENST00000566583&1068&11	ENST00000434411&1866&11	ENST00000601776&2532&11	ENST00000500705&368&11	ENST00000568695&493&11	ENST00000356949&1062&11	ENST00000451920&917&11	ENST00000392228&382&11	ENST00000483240&302&11	ENST00000412499&392&11
53	TCACCTGAGGTCAGGAGT	24	ENST00000523271	8143	hsa-miR-5095	ENST00000523271	8184	ENST00000566036&231&11	ENST00000450909&1570&11	ENST00000512428&1324&11	ENST00000366153&82&11	ENST00000565256&964&11	ENST00000566583&1068&11	ENST00000434411&1866&11	ENST00000601776&2532&11	ENST00000500705&368&11	ENST00000568695&493&11	ENST00000356949&1062&11	ENST00000451920&917&11	ENST00000392228&382&11	ENST00000483240&302&11	ENST00000412499&392&11
53	TCACCTGAGGTCAGGAGT	24	ENST00000563601	838	hsa-miR-5095	ENST00000563601	879	ENST00000566036&231&11	ENST00000450909&1570&11	ENST00000512428&1324&11	ENST00000366153&82&11	ENST00000565256&964&11	ENST00000566583&1068&11	ENST00000434411&1866&11	ENST00000601776&2532&11	ENST00000500705&368&11	ENST00000568695&493&11	ENST00000356949&1062&11	ENST00000451920&917&11	ENST00000392228&382&11	ENST00000483240&302&11	ENST00000412499&392&11
53	TCACCTGAGGTCAGGAGT	24	ENST00000531111	220	hsa-miR-5095	ENST00000531111	261	ENST00000566036&231&11	ENST00000450909&1570&11	ENST00000512428&1324&11	ENST00000366153&82&11	ENST00000565256&964&11	ENST00000566583&1068&11	ENST00000434411&1866&11	ENST00000601776&2532&11	ENST00000500705&368&11	ENST00000568695&493&11	ENST00000356949&1062&11	ENST00000451920&917&11	ENST00000392228&382&11	ENST00000483240&302&11	ENST00000412499&392&11
53	TCACCTGAGGTCAGGAGT	24	ENST00000571914	389	hsa-miR-5095	ENST00000571914	430	ENST00000566036&231&11	ENST00000450909&1570&11	ENST00000512428&1324&11	ENST00000366153&82&11	ENST00000565256&964&11	ENST00000566583&1068&11	ENST00000434411&1866&11	ENST00000601776&2532&11	ENST00000500705&368&11	ENST00000568695&493&11	ENST00000356949&1062&11	ENST00000451920&917&11	ENST00000392228&382&11	ENST00000483240&302&11	ENST00000412499&392&11
53	TCACCTGAGGTCAGGAGT	24	ENST00000596577	1955	hsa-miR-5095	ENST00000596577	1996	ENST00000566036&231&11	ENST00000450909&1570&11	ENST00000512428&1324&11	ENST00000366153&82&11	ENST00000565256&964&11	ENST00000566583&1068&11	ENST00000434411&1866&11	ENST00000601776&2532&11	ENST00000500705&368&11	ENST00000568695&493&11	ENST00000356949&1062&11	ENST00000451920&917&11	ENST00000392228&382&11	ENST00000483240&302&11	ENST00000412499&392&11
53	TCACCTGAGGTCAGGAGT	24	ENST00000573424	1471	hsa-miR-5096	ENST00000573424	1432	ENST00000566036&231&11	ENST00000450909&1570&11	ENST00000512428&1324&11	ENST00000366153&82&11	ENST00000565256&964&11	ENST00000566583&1068&11	ENST00000434411&1866&11	ENST00000601776&2532&11	ENST00000500705&368&11	ENST00000568695&493&11	ENST00000356949&1062&11	ENST00000451920&917&11	ENST00000392228&382&11	ENST00000483240&302&11	ENST00000412499&392&11
53	TCACCTGAGGTCAGGAGT	24	ENST00000573424	1471	hsa-miR-5096	ENST00000573424	1567	ENST00000566036&231&11	ENST00000450909&1570&11	ENST00000512428&1324&11	ENST00000366153&82&11	ENST00000565256&964&11	ENST00000566583&1068&11	ENST00000434411&1866&11	ENST00000601776&2532&11	ENST00000500705&368&11	ENST00000568695&493&11	ENST00000356949&1062&11	ENST00000451920&917&11	ENST00000392228&382&11	ENST00000483240&302&11	ENST00000412499&392&11
53	TCACCTGAGGTCAGGAGT	24	ENST00000394434	4538	hsa-miR-5096	ENST00000394434	4499	ENST00000566036&231&11	ENST00000450909&1570&11	ENST00000512428&1324&11	ENST00000366153&82&11	ENST00000565256&964&11	ENST00000566583&1068&11	ENST00000434411&1866&11	ENST00000601776&2532&11	ENST00000500705&368&11	ENST00000568695&493&11	ENST00000356949&1062&11	ENST00000451920&917&11	ENST00000392228&382&11	ENST00000483240&302&11	ENST00000412499&392&11
53	TCACCTGAGGTCAGGAGT	24	ENST00000510711	1229	hsa-miR-5096	ENST00000510711	1545	ENST00000566036&231&11	ENST00000450909&1570&11	ENST00000512428&1324&11	ENST00000366153&82&11	ENST00000565256&964&11	ENST00000566583&1068&11	ENST00000434411&1866&11	ENST00000601776&2532&11	ENST00000500705&368&11	ENST00000568695&493&11	ENST00000356949&1062&11	ENST00000451920&917&11	ENST00000392228&382&11	ENST00000483240&302&11	ENST00000412499&392&11
53	TCACCTGAGGTCAGGAGT	24	ENST00000409982	830	hsa-miR-5096	ENST00000409982	791	ENST00000566036&231&11	ENST00000450909&1570&11	ENST00000512428&1324&11	ENST00000366153&82&11	ENST00000565256&964&11	ENST00000566583&1068&11	ENST00000434411&1866&11	ENST00000601776&2532&11	ENST00000500705&368&11	ENST00000568695&493&11	ENST00000356949&1062&11	ENST00000451920&917&11	ENST00000392228&382&11	ENST00000483240&302&11	ENST00000412499&392&11
53	TCACCTGAGGTCAGGAGT	24	ENST00000476203	3829	hsa-miR-5096	ENST00000476203	3791	ENST00000566036&231&11	ENST00000450909&1570&11	ENST00000512428&1324&11	ENST00000366153&82&11	ENST00000565256&964&11	ENST00000566583&1068&11	ENST00000434411&1866&11	ENST00000601776&2532&11	ENST00000500705&368&11	ENST00000568695&493&11	ENST00000356949&1062&11	ENST00000451920&917&11	ENST00000392228&382&11	ENST00000483240&302&11	ENST00000412499&392&11
53	TCACCTGAGGTCAGGAGT	24	ENST00000590227	422	hsa-miR-5096	ENST00000590227	383	ENST00000566036&231&11	ENST00000450909&1570&11	ENST00000512428&1324&11	ENST00000366153&82&11	ENST00000565256&964&11	ENST00000566583&1068&11	ENST00000434411&1866&11	ENST00000601776&2532&11	ENST00000500705&368&11	ENST00000568695&493&11	ENST00000356949&1062&11	ENST00000451920&917&11	ENST00000392228&382&11	ENST00000483240&302&11	ENST00000412499&392&11
53	TCACCTGAGGTCAGGAGT	24	ENST00000554660	866	hsa-miR-5096	ENST00000554660	827	ENST00000566036&231&11	ENST00000450909&1570&11	ENST00000512428&1324&11	ENST00000366153&82&11	ENST00000565256&964&11	ENST00000566583&1068&11	ENST00000434411&1866&11	ENST00000601776&2532&11	ENST00000500705&368&11	ENST00000568695&493&11	ENST00000356949&1062&11	ENST00000451920&917&11	ENST00000392228&382&11	ENST00000483240&302&11	ENST00000412499&392&11
53	TCACCTGAGGTCAGGAGT	24	ENST00000563793	203	hsa-miR-5096	ENST00000563793	164	ENST00000566036&231&11	ENST00000450909&1570&11	ENST00000512428&1324&11	ENST00000366153&82&11	ENST00000565256&964&11	ENST00000566583&1068&11	ENST00000434411&1866&11	ENST00000601776&2532&11	ENST00000500705&368&11	ENST00000568695&493&11	ENST00000356949&1062&11	ENST00000451920&917&11	ENST00000392228&382&11	ENST00000483240&302&11	ENST00000412499&392&11
54	TTTTTAGTAGAGATGGGGTTTCACC	3	ENST00000521861	1718	hsa-miR-1285-3p	ENST00000521861	1856	ENST00000600661&1245&23
54	TTTTTAGTAGAGATGGGGTTTCACC	3	ENST00000471144	460	hsa-miR-1273a	ENST00000471144	601	ENST00000600661&1245&23
54	TTTTTAGTAGAGATGGGGTTTCACC	3	ENST00000484427	1963	hsa-miR-1273a	ENST00000484427	2104	ENST00000600661&1245&23
54	TTTTTAGTAGAGATGGGGTTTCACC	3	ENST00000590071	4399	hsa-miR-1273c	ENST00000590071	4239	ENST00000600661&1245&23
54	TTTTTAGTAGAGATGGGGTTTCACC	3	ENST00000231498	7287	hsa-miR-1273e	ENST00000231498	7373	ENST00000600661&1245&23
54	TTTTTAGTAGAGATGGGGTTTCACC	3	ENST00000537526	3601	hsa-miR-1273e	ENST00000537526	3680	ENST00000600661&1245&23
54	TTTTTAGTAGAGATGGGGTTTCACC	3	ENST00000261497	3841	hsa-miR-1273e	ENST00000261497	3920	ENST00000600661&1245&23
54	TTTTTAGTAGAGATGGGGTTTCACC	3	ENST00000455424	653	hsa-miR-1273g-3p	ENST00000455424	776	ENST00000600661&1245&23
54	TTTTTAGTAGAGATGGGGTTTCACC	3	ENST00000480612	266	hsa-miR-1273f	ENST00000480612	354	ENST00000600661&1245&23
54	TTTTTAGTAGAGATGGGGTTTCACC	3	ENST00000512591	377	hsa-miR-1273g-3p	ENST00000512591	501	ENST00000600661&1245&23
54	TTTTTAGTAGAGATGGGGTTTCACC	3	ENST00000465342	3042	hsa-miR-1273g-3p	ENST00000465342	3165	ENST00000600661&1245&23
54	TTTTTAGTAGAGATGGGGTTTCACC	3	ENST00000462616	2438	hsa-miR-1273g-3p	ENST00000462616	2751	ENST00000600661&1245&23
54	TTTTTAGTAGAGATGGGGTTTCACC	3	ENST00000600850	868	hsa-miR-1273g-3p	ENST00000600850	988	ENST00000600661&1245&23
55	AGGATGGTCTCGATCTCCTGA	3	ENST00000455424	653	hsa-miR-1273g-3p	ENST00000455424	810	ENST00000428200&271&10
56	ATTAGCCGGGCGTGGTGGCA	2	ENST00000338352	1271	hsa-miR-5095	ENST00000338352	1382	ENST00000403568&1124&16	ENST00000504366&1206&17	ENST00000370978&3839&10	ENST00000452676&321&13	ENST00000599096&265&13	ENST00000475969&1360&29	ENST00000378206&1471&29	ENST00000339350&1634&29	ENST00000477548&1552&29	ENST00000468793&1615&29	ENST00000491998&1781&29	ENST00000378209&1657&29	ENST00000514026&6467&29	ENST00000367996&3885&29	ENST00000469275&611&29	ENST00000449224&1482&13	ENST00000320954&1686&13	ENST00000597777&480&29	ENST00000534656&929&27	ENST00000574118&929&27	ENST00000450686&400&29	ENST00000512496&62&16	ENST00000596579&521&17	ENST00000493504&1429&17	ENST00000568371&571&29	ENST00000566574&614&27	ENST00000491741&816&17	ENST00000526724&1948&27	ENST00000588427&301&27	ENST00000275053&6878&16
56	ATTAGCCGGGCGTGGTGGCA	2	ENST00000586372	2923	hsa-miR-5585-3p	ENST00000586372	2887	ENST00000403568&1124&16	ENST00000504366&1206&17	ENST00000370978&3839&10	ENST00000452676&321&13	ENST00000599096&265&13	ENST00000475969&1360&29	ENST00000378206&1471&29	ENST00000339350&1634&29	ENST00000477548&1552&29	ENST00000468793&1615&29	ENST00000491998&1781&29	ENST00000378209&1657&29	ENST00000514026&6467&29	ENST00000367996&3885&29	ENST00000469275&611&29	ENST00000449224&1482&13	ENST00000320954&1686&13	ENST00000597777&480&29	ENST00000534656&929&27	ENST00000574118&929&27	ENST00000450686&400&29	ENST00000512496&62&16	ENST00000596579&521&17	ENST00000493504&1429&17	ENST00000568371&571&29	ENST00000566574&614&27	ENST00000491741&816&17	ENST00000526724&1948&27	ENST00000588427&301&27	ENST00000275053&6878&16
57	ATCTCAGCTCACTGCAACCTCTA	2	ENST00000479136	28	hsa-miR-1273a	ENST00000479136	58	ENST00000536118&1356&10	ENST00000431837&2621&11	ENST00000448290&2756&11	ENST00000442832&1542&40	ENST00000590787&3955&10	ENST00000558838&2521&11	ENST00000581788&1127&11	ENST00000499478&2417&10	ENST00000500093&1021&40	ENST00000556386&1828&11	ENST00000453209&3930&11	ENST00000414662&3931&11	ENST00000437716&3930&11	ENST00000575786&704&11	ENST00000558211&509&10	ENST00000314927&1544&11	ENST00000483846&2292&10	ENST00000417100&704&11	ENST00000584218&1390&11	ENST00000596009&1397&10	ENST00000570415&44&11	ENST00000479959&2182&11	ENST00000354286&1531&11	ENST00000319863&1915&11	ENST00000225519&3148&10	ENST00000471389&4686&40	ENST00000568530&7161&40	ENST00000288050&7956&40	ENST00000482662&147&10	ENST00000502251&1102&11	ENST00000374548&1051&11	ENST00000533317&1424&11	ENST00000269919&1716&11	ENST00000510711&1380&10	ENST00000285767&2393&11	ENST00000299192&2595&11	ENST00000482404&4338&10	ENST00000480046&3100&10	ENST00000480046&4195&10	ENST00000480046&4366&10	ENST00000498286&4025&10	ENST00000375990&7073&11
57	ATCTCAGCTCACTGCAACCTCTA	2	ENST00000480655	350	hsa-miR-1273g-3p	ENST00000480655	362	ENST00000536118&1356&10	ENST00000431837&2621&11	ENST00000448290&2756&11	ENST00000442832&1542&40	ENST00000590787&3955&10	ENST00000558838&2521&11	ENST00000581788&1127&11	ENST00000499478&2417&10	ENST00000500093&1021&40	ENST00000556386&1828&11	ENST00000453209&3930&11	ENST00000414662&3931&11	ENST00000437716&3930&11	ENST00000575786&704&11	ENST00000558211&509&10	ENST00000314927&1544&11	ENST00000483846&2292&10	ENST00000417100&704&11	ENST00000584218&1390&11	ENST00000596009&1397&10	ENST00000570415&44&11	ENST00000479959&2182&11	ENST00000354286&1531&11	ENST00000319863&1915&11	ENST00000225519&3148&10	ENST00000471389&4686&40	ENST00000568530&7161&40	ENST00000288050&7956&40	ENST00000482662&147&10	ENST00000502251&1102&11	ENST00000374548&1051&11	ENST00000533317&1424&11	ENST00000269919&1716&11	ENST00000510711&1380&10	ENST00000285767&2393&11	ENST00000299192&2595&11	ENST00000482404&4338&10	ENST00000480046&3100&10	ENST00000480046&4195&10	ENST00000480046&4366&10	ENST00000498286&4025&10	ENST00000375990&7073&11
58	CAGGCTGGAGTGCAGTGGCA	8	ENST00000366391	45	hsa-miR-1285-3p	ENST00000366391	50	ENST00000505153&5631&16	ENST00000395519&743&16
58	CAGGCTGGAGTGCAGTGGCA	8	ENST00000588534	75	hsa-miR-1285-3p	ENST00000588534	80	ENST00000505153&5631&16	ENST00000395519&743&16
58	CAGGCTGGAGTGCAGTGGCA	8	ENST00000544423	527	hsa-miR-1285-3p	ENST00000544423	532	ENST00000505153&5631&16	ENST00000395519&743&16
58	CAGGCTGGAGTGCAGTGGCA	8	ENST00000442850	84	hsa-miR-1285-3p	ENST00000442850	89	ENST00000505153&5631&16	ENST00000395519&743&16
58	CAGGCTGGAGTGCAGTGGCA	8	ENST00000473778	1242	hsa-miR-1273a	ENST00000473778	1250	ENST00000505153&5631&16	ENST00000395519&743&16
58	CAGGCTGGAGTGCAGTGGCA	8	ENST00000503602	1036	hsa-miR-1273a	ENST00000503602	1044	ENST00000505153&5631&16	ENST00000395519&743&16
58	CAGGCTGGAGTGCAGTGGCA	8	ENST00000547793	34	hsa-miR-1273a	ENST00000547793	42	ENST00000505153&5631&16	ENST00000395519&743&16
58	CAGGCTGGAGTGCAGTGGCA	8	ENST00000275053	6737	hsa-miR-1273a	ENST00000275053	6745	ENST00000505153&5631&16	ENST00000395519&743&16
58	CAGGCTGGAGTGCAGTGGCA	8	ENST00000537394	444	hsa-miR-1273a	ENST00000537394	452	ENST00000505153&5631&16	ENST00000395519&743&16
58	CAGGCTGGAGTGCAGTGGCA	8	ENST00000590071	4399	hsa-miR-1273c	ENST00000590071	4107	ENST00000505153&5631&16	ENST00000395519&743&16
58	CAGGCTGGAGTGCAGTGGCA	8	ENST00000330266	3259	hsa-miR-1273e	ENST00000330266	3205	ENST00000505153&5631&16	ENST00000395519&743&16
58	CAGGCTGGAGTGCAGTGGCA	8	ENST00000359680	1588	hsa-miR-1273e	ENST00000359680	1534	ENST00000505153&5631&16	ENST00000395519&743&16
58	CAGGCTGGAGTGCAGTGGCA	8	ENST00000453655	1751	hsa-miR-1273e	ENST00000453655	1697	ENST00000505153&5631&16	ENST00000395519&743&16
58	CAGGCTGGAGTGCAGTGGCA	8	ENST00000380579	1651	hsa-miR-1273e	ENST00000380579	1597	ENST00000505153&5631&16	ENST00000395519&743&16
58	CAGGCTGGAGTGCAGTGGCA	8	ENST00000556243	245	hsa-miR-1273e	ENST00000556243	174	ENST00000505153&5631&16	ENST00000395519&743&16
58	CAGGCTGGAGTGCAGTGGCA	8	ENST00000566036	63	hsa-miR-1273f	ENST00000566036	22	ENST00000505153&5631&16	ENST00000395519&743&16
58	CAGGCTGGAGTGCAGTGGCA	8	ENST00000586025	2354	hsa-miR-1273g-3p	ENST00000586025	1865	ENST00000505153&5631&16	ENST00000395519&743&16
58	CAGGCTGGAGTGCAGTGGCA	8	ENST00000586025	2354	hsa-miR-1273g-3p	ENST00000586025	2173	ENST00000505153&5631&16	ENST00000395519&743&16
58	CAGGCTGGAGTGCAGTGGCA	8	ENST00000586025	2354	hsa-miR-1273g-3p	ENST00000586025	2344	ENST00000505153&5631&16	ENST00000395519&743&16
58	CAGGCTGGAGTGCAGTGGCA	8	ENST00000357137	5385	hsa-miR-1273f	ENST00000357137	5344	ENST00000505153&5631&16	ENST00000395519&743&16
58	CAGGCTGGAGTGCAGTGGCA	8	ENST00000432854	3529	hsa-miR-1273f	ENST00000432854	3488	ENST00000505153&5631&16	ENST00000395519&743&16
58	CAGGCTGGAGTGCAGTGGCA	8	ENST00000480612	266	hsa-miR-1273f	ENST00000480612	225	ENST00000505153&5631&16	ENST00000395519&743&16
58	CAGGCTGGAGTGCAGTGGCA	8	ENST00000523129	1746	hsa-miR-1273g-3p	ENST00000523129	1441	ENST00000505153&5631&16	ENST00000395519&743&16
58	CAGGCTGGAGTGCAGTGGCA	8	ENST00000416209	1746	hsa-miR-1273g-3p	ENST00000416209	1441	ENST00000505153&5631&16	ENST00000395519&743&16
58	CAGGCTGGAGTGCAGTGGCA	8	ENST00000518639	956	hsa-miR-1273g-3p	ENST00000518639	946	ENST00000505153&5631&16	ENST00000395519&743&16
58	CAGGCTGGAGTGCAGTGGCA	8	ENST00000369066	6364	hsa-miR-1273g-3p	ENST00000369066	6354	ENST00000505153&5631&16	ENST00000395519&743&16
58	CAGGCTGGAGTGCAGTGGCA	8	ENST00000564309	366	hsa-miR-1273g-3p	ENST00000564309	356	ENST00000505153&5631&16	ENST00000395519&743&16
58	CAGGCTGGAGTGCAGTGGCA	8	ENST00000462315	3700	hsa-miR-1273g-3p	ENST00000462315	3690	ENST00000505153&5631&16	ENST00000395519&743&16
58	CAGGCTGGAGTGCAGTGGCA	8	ENST00000592904	879	hsa-miR-1273g-3p	ENST00000592904	869	ENST00000505153&5631&16	ENST00000395519&743&16
58	CAGGCTGGAGTGCAGTGGCA	8	ENST00000462616	2438	hsa-miR-1273g-3p	ENST00000462616	2428	ENST00000505153&5631&16	ENST00000395519&743&16
58	CAGGCTGGAGTGCAGTGGCA	8	ENST00000474456	999	hsa-miR-1273g-3p	ENST00000474456	989	ENST00000505153&5631&16	ENST00000395519&743&16
58	CAGGCTGGAGTGCAGTGGCA	8	ENST00000322989	1236	hsa-miR-1273g-3p	ENST00000322989	1226	ENST00000505153&5631&16	ENST00000395519&743&16
58	CAGGCTGGAGTGCAGTGGCA	8	ENST00000380079	3054	hsa-miR-1273g-3p	ENST00000380079	3044	ENST00000505153&5631&16	ENST00000395519&743&16
58	CAGGCTGGAGTGCAGTGGCA	8	ENST00000464571	1286	hsa-miR-1273g-3p	ENST00000464571	1276	ENST00000505153&5631&16	ENST00000395519&743&16
58	CAGGCTGGAGTGCAGTGGCA	8	ENST00000308062	1289	hsa-miR-1273g-3p	ENST00000308062	1279	ENST00000505153&5631&16	ENST00000395519&743&16
58	CAGGCTGGAGTGCAGTGGCA	8	ENST00000600299	572	hsa-miR-1273g-3p	ENST00000600299	562	ENST00000505153&5631&16	ENST00000395519&743&16
58	CAGGCTGGAGTGCAGTGGCA	8	ENST00000527570	245	hsa-miR-1273g-3p	ENST00000527570	235	ENST00000505153&5631&16	ENST00000395519&743&16
58	CAGGCTGGAGTGCAGTGGCA	8	ENST00000511063	1244	hsa-miR-1273g-3p	ENST00000511063	1234	ENST00000505153&5631&16	ENST00000395519&743&16
58	CAGGCTGGAGTGCAGTGGCA	8	ENST00000448248	904	hsa-miR-1273g-3p	ENST00000448248	894	ENST00000505153&5631&16	ENST00000395519&743&16
58	CAGGCTGGAGTGCAGTGGCA	8	ENST00000514664	2941	hsa-miR-1273g-3p	ENST00000514664	2931	ENST00000505153&5631&16	ENST00000395519&743&16
58	CAGGCTGGAGTGCAGTGGCA	8	ENST00000459674	1161	hsa-miR-1273g-3p	ENST00000459674	1151	ENST00000505153&5631&16	ENST00000395519&743&16
58	CAGGCTGGAGTGCAGTGGCA	8	ENST00000403385	1283	hsa-miR-1273g-3p	ENST00000403385	1273	ENST00000505153&5631&16	ENST00000395519&743&16
59	GGAGGATCGCTTGAGCCCAGGAGT	2	ENST00000491239	2015	hsa-miR-5585-3p	ENST00000491239	1903	ENST00000444210&918&11	ENST00000219235&2433&11	ENST00000555998&99&16	ENST00000577595&164&11	ENST00000587986&2981&12	ENST00000371980&1286&11	ENST00000489274&509&11	ENST00000518855&353&11	ENST00000489697&645&11
60	GGTGGGCGGATCACAAGG	2	ENST00000586372	3494	hsa-miR-5585-3p	ENST00000586372	3377	ENST00000506530&1228&35	ENST00000485330&1184&35	ENST00000395957&4292&35	ENST00000368761&3796&35	ENST00000517385&573&35	ENST00000375003&260&35	ENST00000443905&2435&35	ENST00000591639&2435&35	ENST00000555640&1181&35	ENST00000495497&171&35	ENST00000592582&2973&16
61	AAATTAGCTGGGTGTGGTG	2	ENST00000555248	2606	hsa-miR-1285-5p	ENST00000555248	2637	ENST00000568496&628&36	ENST00000598846&1645&36	ENST00000550882&153&36	ENST00000582078&273&14	ENST00000490090&4423&13	ENST00000383657&2614&27	ENST00000480288&161&29	ENST00000465290&50&29	ENST00000487186&1632&13	ENST00000553458&2811&13	ENST00000483767&161&13
61	AAATTAGCTGGGTGTGGTG	2	ENST00000541702	2505	hsa-miR-1285-5p	ENST00000541702	2536	ENST00000568496&628&36	ENST00000598846&1645&36	ENST00000550882&153&36	ENST00000582078&273&14	ENST00000490090&4423&13	ENST00000383657&2614&27	ENST00000480288&161&29	ENST00000465290&50&29	ENST00000487186&1632&13	ENST00000553458&2811&13	ENST00000483767&161&13
61	AAATTAGCTGGGTGTGGTG	2	ENST00000446628	1851	hsa-miR-5095	ENST00000446628	1961	ENST00000568496&628&36	ENST00000598846&1645&36	ENST00000550882&153&36	ENST00000582078&273&14	ENST00000490090&4423&13	ENST00000383657&2614&27	ENST00000480288&161&29	ENST00000465290&50&29	ENST00000487186&1632&13	ENST00000553458&2811&13	ENST00000483767&161&13
61	AAATTAGCTGGGTGTGGTG	2	ENST00000399576	238	hsa-miR-1273g-3p	ENST00000399576	385	ENST00000568496&628&36	ENST00000598846&1645&36	ENST00000550882&153&36	ENST00000582078&273&14	ENST00000490090&4423&13	ENST00000383657&2614&27	ENST00000480288&161&29	ENST00000465290&50&29	ENST00000487186&1632&13	ENST00000553458&2811&13	ENST00000483767&161&13
61	AAATTAGCTGGGTGTGGTG	2	ENST00000497341	3334	hsa-miR-5585-3p	ENST00000497341	3296	ENST00000568496&628&36	ENST00000598846&1645&36	ENST00000550882&153&36	ENST00000582078&273&14	ENST00000490090&4423&13	ENST00000383657&2614&27	ENST00000480288&161&29	ENST00000465290&50&29	ENST00000487186&1632&13	ENST00000553458&2811&13	ENST00000483767&161&13
61	AAATTAGCTGGGTGTGGTG	2	ENST00000314641	3392	hsa-miR-5585-3p	ENST00000314641	3354	ENST00000568496&628&36	ENST00000598846&1645&36	ENST00000550882&153&36	ENST00000582078&273&14	ENST00000490090&4423&13	ENST00000383657&2614&27	ENST00000480288&161&29	ENST00000465290&50&29	ENST00000487186&1632&13	ENST00000553458&2811&13	ENST00000483767&161&13
61	AAATTAGCTGGGTGTGGTG	2	ENST00000552774	104	hsa-miR-5585-3p	ENST00000552774	64	ENST00000568496&628&36	ENST00000598846&1645&36	ENST00000550882&153&36	ENST00000582078&273&14	ENST00000490090&4423&13	ENST00000383657&2614&27	ENST00000480288&161&29	ENST00000465290&50&29	ENST00000487186&1632&13	ENST00000553458&2811&13	ENST00000483767&161&13
61	AAATTAGCTGGGTGTGGTG	2	ENST00000548855	4620	hsa-miR-5585-3p	ENST00000548855	4580	ENST00000568496&628&36	ENST00000598846&1645&36	ENST00000550882&153&36	ENST00000582078&273&14	ENST00000490090&4423&13	ENST00000383657&2614&27	ENST00000480288&161&29	ENST00000465290&50&29	ENST00000487186&1632&13	ENST00000553458&2811&13	ENST00000483767&161&13
62	GGAGGCTGAGGCAGGCGA	2	ENST00000539680	3689	hsa-miR-5585-3p	ENST00000539680	3697	ENST00000594558&159&13	ENST00000366252&69&13	ENST00000411857&3761&12	ENST00000381585&1909&13	ENST00000254908&974&12	ENST00000503699&620&13	ENST00000427512&4598&10	ENST00000343280&4887&10	ENST00000361319&3199&10	ENST00000218008&3211&10	ENST00000369291&2005&10	ENST00000334660&2214&13	ENST00000558881&142&12	ENST00000416079&320&10	ENST00000556287&232&10	ENST00000504331&272&13	ENST00000366211&238&10	ENST00000548181&1026&10	ENST00000574928&3089&10	ENST00000396048&2647&13
63	GCTGGGATTACAGGCATGAGC	2	ENST00000395530	5837	hsa-miR-1273a	ENST00000395530	5741	ENST00000575402&2677&10	ENST00000444558&3625&10	ENST00000560958&1533&10	ENST00000414432&3635&10	ENST00000481349&2449&10
63	GCTGGGATTACAGGCATGAGC	2	ENST00000357137	6056	hsa-miR-1273a	ENST00000357137	6006	ENST00000575402&2677&10	ENST00000444558&3625&10	ENST00000560958&1533&10	ENST00000414432&3635&10	ENST00000481349&2449&10
63	GCTGGGATTACAGGCATGAGC	2	ENST00000231498	7287	hsa-miR-1273e	ENST00000231498	7463	ENST00000575402&2677&10	ENST00000444558&3625&10	ENST00000560958&1533&10	ENST00000414432&3635&10	ENST00000481349&2449&10
63	GCTGGGATTACAGGCATGAGC	2	ENST00000515103	627	hsa-miR-1273e	ENST00000515103	762	ENST00000575402&2677&10	ENST00000444558&3625&10	ENST00000560958&1533&10	ENST00000414432&3635&10	ENST00000481349&2449&10
63	GCTGGGATTACAGGCATGAGC	2	ENST00000455424	653	hsa-miR-1273g-3p	ENST00000455424	864	ENST00000575402&2677&10	ENST00000444558&3625&10	ENST00000560958&1533&10	ENST00000414432&3635&10	ENST00000481349&2449&10
63	GCTGGGATTACAGGCATGAGC	2	ENST00000519692	2175	hsa-miR-1273g-3p	ENST00000519692	2389	ENST00000575402&2677&10	ENST00000444558&3625&10	ENST00000560958&1533&10	ENST00000414432&3635&10	ENST00000481349&2449&10
64	GGAGGATCGCTTGAGCCCAGGAG	2	ENST00000491239	2015	hsa-miR-5585-3p	ENST00000491239	1903	ENST00000444210&918&11	ENST00000219235&2433&11	ENST00000587986&2981&12	ENST00000371980&1286&11	ENST00000555998&99&16	ENST00000577595&164&11	ENST00000489274&509&11	ENST00000489697&645&11	ENST00000479515&686&11
65	GGAGGCTGAGGCAGGAGAATCGCT	2	ENST00000562760	1006	hsa-miR-5096	ENST00000562760	1083	ENST00000565050&821&13	ENST00000568776&619&13	ENST00000601343&682&15	ENST00000565600&219&13
65	GGAGGCTGAGGCAGGAGAATCGCT	2	ENST00000510711	1229	hsa-miR-5096	ENST00000510711	1316	ENST00000565050&821&13	ENST00000568776&619&13	ENST00000601343&682&15	ENST00000565600&219&13
65	GGAGGCTGAGGCAGGAGAATCGCT	2	ENST00000409982	830	hsa-miR-5096	ENST00000409982	907	ENST00000565050&821&13	ENST00000568776&619&13	ENST00000601343&682&15	ENST00000565600&219&13
65	GGAGGCTGAGGCAGGAGAATCGCT	2	ENST00000370799	1539	hsa-miR-5096	ENST00000370799	1615	ENST00000565050&821&13	ENST00000568776&619&13	ENST00000601343&682&15	ENST00000565600&219&13
65	GGAGGCTGAGGCAGGAGAATCGCT	2	ENST00000590227	422	hsa-miR-5096	ENST00000590227	486	ENST00000565050&821&13	ENST00000568776&619&13	ENST00000601343&682&15	ENST00000565600&219&13
65	GGAGGCTGAGGCAGGAGAATCGCT	2	ENST00000563793	203	hsa-miR-5096	ENST00000563793	283	ENST00000565050&821&13	ENST00000568776&619&13	ENST00000601343&682&15	ENST00000565600&219&13
65	GGAGGCTGAGGCAGGAGAATCGCT	2	ENST00000600410	2247	hsa-miR-5096	ENST00000600410	2323	ENST00000565050&821&13	ENST00000568776&619&13	ENST00000601343&682&15	ENST00000565600&219&13
65	GGAGGCTGAGGCAGGAGAATCGCT	2	ENST00000563945	298	hsa-miR-5096	ENST00000563945	374	ENST00000565050&821&13	ENST00000568776&619&13	ENST00000601343&682&15	ENST00000565600&219&13
65	GGAGGCTGAGGCAGGAGAATCGCT	2	ENST00000318348	1249	hsa-miR-5096	ENST00000318348	1327	ENST00000565050&821&13	ENST00000568776&619&13	ENST00000601343&682&15	ENST00000565600&219&13
65	GGAGGCTGAGGCAGGAGAATCGCT	2	ENST00000576086	799	hsa-miR-5585-3p	ENST00000576086	807	ENST00000565050&821&13	ENST00000568776&619&13	ENST00000601343&682&15	ENST00000565600&219&13
65	GGAGGCTGAGGCAGGAGAATCGCT	2	ENST00000423644	4475	hsa-miR-5585-3p	ENST00000423644	4483	ENST00000565050&821&13	ENST00000568776&619&13	ENST00000601343&682&15	ENST00000565600&219&13
65	GGAGGCTGAGGCAGGAGAATCGCT	2	ENST00000359484	4348	hsa-miR-5585-3p	ENST00000359484	4356	ENST00000565050&821&13	ENST00000568776&619&13	ENST00000601343&682&15	ENST00000565600&219&13
65	GGAGGCTGAGGCAGGAGAATCGCT	2	ENST00000346834	4411	hsa-miR-5585-3p	ENST00000346834	4419	ENST00000565050&821&13	ENST00000568776&619&13	ENST00000601343&682&15	ENST00000565600&219&13
65	GGAGGCTGAGGCAGGAGAATCGCT	2	ENST00000480696	437	hsa-miR-5585-3p	ENST00000480696	445	ENST00000565050&821&13	ENST00000568776&619&13	ENST00000601343&682&15	ENST00000565600&219&13
65	GGAGGCTGAGGCAGGAGAATCGCT	2	ENST00000394019	4654	hsa-miR-5585-3p	ENST00000394019	4662	ENST00000565050&821&13	ENST00000568776&619&13	ENST00000601343&682&15	ENST00000565600&219&13
65	GGAGGCTGAGGCAGGAGAATCGCT	2	ENST00000483195	4882	hsa-miR-5585-3p	ENST00000483195	4890	ENST00000565050&821&13	ENST00000568776&619&13	ENST00000601343&682&15	ENST00000565600&219&13
65	GGAGGCTGAGGCAGGAGAATCGCT	2	ENST00000597411	656	hsa-miR-5585-3p	ENST00000597411	664	ENST00000565050&821&13	ENST00000568776&619&13	ENST00000601343&682&15	ENST00000565600&219&13
65	GGAGGCTGAGGCAGGAGAATCGCT	2	ENST00000465069	250	hsa-miR-5585-3p	ENST00000465069	258	ENST00000565050&821&13	ENST00000568776&619&13	ENST00000601343&682&15	ENST00000565600&219&13
65	GGAGGCTGAGGCAGGAGAATCGCT	2	ENST00000340681	393	hsa-miR-5585-3p	ENST00000340681	401	ENST00000565050&821&13	ENST00000568776&619&13	ENST00000601343&682&15	ENST00000565600&219&13
65	GGAGGCTGAGGCAGGAGAATCGCT	2	ENST00000337963	2781	hsa-miR-5585-3p	ENST00000337963	2789	ENST00000565050&821&13	ENST00000568776&619&13	ENST00000601343&682&15	ENST00000565600&219&13
65	GGAGGCTGAGGCAGGAGAATCGCT	2	ENST00000502168	2486	hsa-miR-5585-3p	ENST00000502168	2494	ENST00000565050&821&13	ENST00000568776&619&13	ENST00000601343&682&15	ENST00000565600&219&13
65	GGAGGCTGAGGCAGGAGAATCGCT	2	ENST00000535942	2711	hsa-miR-5585-3p	ENST00000535942	2719	ENST00000565050&821&13	ENST00000568776&619&13	ENST00000601343&682&15	ENST00000565600&219&13
65	GGAGGCTGAGGCAGGAGAATCGCT	2	ENST00000382909	2372	hsa-miR-5585-3p	ENST00000382909	2380	ENST00000565050&821&13	ENST00000568776&619&13	ENST00000601343&682&15	ENST00000565600&219&13
65	GGAGGCTGAGGCAGGAGAATCGCT	2	ENST00000358661	2505	hsa-miR-5585-3p	ENST00000358661	2513	ENST00000565050&821&13	ENST00000568776&619&13	ENST00000601343&682&15	ENST00000565600&219&13
65	GGAGGCTGAGGCAGGAGAATCGCT	2	ENST00000354278	3231	hsa-miR-5585-3p	ENST00000354278	3239	ENST00000565050&821&13	ENST00000568776&619&13	ENST00000601343&682&15	ENST00000565600&219&13
65	GGAGGCTGAGGCAGGAGAATCGCT	2	ENST00000351894	3402	hsa-miR-5585-3p	ENST00000351894	3410	ENST00000565050&821&13	ENST00000568776&619&13	ENST00000601343&682&15	ENST00000565600&219&13
65	GGAGGCTGAGGCAGGAGAATCGCT	2	ENST00000535162	3567	hsa-miR-5585-3p	ENST00000535162	3575	ENST00000565050&821&13	ENST00000568776&619&13	ENST00000601343&682&15	ENST00000565600&219&13
65	GGAGGCTGAGGCAGGAGAATCGCT	2	ENST00000324134	3687	hsa-miR-5585-3p	ENST00000324134	3695	ENST00000565050&821&13	ENST00000568776&619&13	ENST00000601343&682&15	ENST00000565600&219&13
66	TGTTAGCCAGGATGGTCTCG	2	ENST00000492534	703	hsa-miR-1273g-3p	ENST00000492534	854	ENST00000525893&156&10	ENST00000433036&391&13	ENST00000581040&1293&13	ENST00000366259&780&10	ENST00000546789&358&10	ENST00000597346&74228&10	ENST00000597346&78821&10	ENST00000502789&883&10	ENST00000383461&905&10	ENST00000551271&1566&10	ENST00000591761&835&10	ENST00000461286&1614&12	ENST00000366152&320&10	ENST00000366187&359&12	ENST00000449569&2493&10	ENST00000441363&2038&10	ENST00000427638&358&10	ENST00000559989&7572&25	ENST00000326237&124&12	ENST00000366264&142&12	ENST00000562618&1668&13	ENST00000510256&587&10	ENST00000489074&587&10	ENST00000458685&352&12	ENST00000411678&2223&10	ENST00000589439&1313&10	ENST00000576928&2513&13	ENST00000570894&2595&10	ENST00000576704&2592&10	ENST00000587221&1313&10	ENST00000600145&2394&13	ENST00000570726&2592&10	ENST00000575296&2618&10	ENST00000585529&1313&10	ENST00000592538&1313&10	ENST00000586069&1313&10	ENST00000590939&1313&10	ENST00000586303&1313&10	ENST00000574314&2430&13	ENST00000573669&1545&13	ENST00000587996&1313&10	ENST00000571923&2592&10
67	GGCGGATCACCTGAGGTCAGGAG	4	ENST00000476203	3829	hsa-miR-5096	ENST00000476203	3785	ENST00000565150&1116&11	ENST00000566036&236&11	ENST00000374976&62&11	ENST00000589217&1526&11	ENST00000592939&62&11	ENST00000565256&969&11	ENST00000565256&521&11	ENST00000566583&1073&11	ENST00000566583&625&11	ENST00000434411&1871&11	ENST00000434411&1423&11	ENST00000416301&3373&11	ENST00000411857&3750&11	ENST00000590969&1142&11	ENST00000589439&1785&11	ENST00000588029&1142&11	ENST00000587221&1785&11	ENST00000588082&1142&11	ENST00000585529&1785&11	ENST00000587249&1142&11	ENST00000592538&1785&11	ENST00000589366&1142&11	ENST00000586069&1785&11	ENST00000592868&1142&11	ENST00000590939&1785&11	ENST00000589483&1142&11	ENST00000586303&1785&11	ENST00000592635&1142&11	ENST00000587996&1785&11	ENST00000573109&2011&11	ENST00000550383&4010&11	ENST00000550383&2896&11	ENST00000369037&2256&11	ENST00000174621&3363&11	ENST00000174621&3682&11	ENST00000399756&3606&11	ENST00000399756&3925&11	ENST00000571088&3293&11	ENST00000571088&3612&11	ENST00000399759&3280&11	ENST00000399759&3599&11	ENST00000572705&3354&11
67	GGCGGATCACCTGAGGTCAGGAG	4	ENST00000563793	203	hsa-miR-5096	ENST00000563793	158	ENST00000565150&1116&11	ENST00000566036&236&11	ENST00000374976&62&11	ENST00000589217&1526&11	ENST00000592939&62&11	ENST00000565256&969&11	ENST00000565256&521&11	ENST00000566583&1073&11	ENST00000566583&625&11	ENST00000434411&1871&11	ENST00000434411&1423&11	ENST00000416301&3373&11	ENST00000411857&3750&11	ENST00000590969&1142&11	ENST00000589439&1785&11	ENST00000588029&1142&11	ENST00000587221&1785&11	ENST00000588082&1142&11	ENST00000585529&1785&11	ENST00000587249&1142&11	ENST00000592538&1785&11	ENST00000589366&1142&11	ENST00000586069&1785&11	ENST00000592868&1142&11	ENST00000590939&1785&11	ENST00000589483&1142&11	ENST00000586303&1785&11	ENST00000592635&1142&11	ENST00000587996&1785&11	ENST00000573109&2011&11	ENST00000550383&4010&11	ENST00000550383&2896&11	ENST00000369037&2256&11	ENST00000174621&3363&11	ENST00000174621&3682&11	ENST00000399756&3606&11	ENST00000399756&3925&11	ENST00000571088&3293&11	ENST00000571088&3612&11	ENST00000399759&3280&11	ENST00000399759&3599&11	ENST00000572705&3354&11
68	CAGGCTGGAGTGCAGTGGTG	7	ENST00000481134	1515	hsa-miR-1285-3p	ENST00000481134	1520	ENST00000505153&5631&16
68	CAGGCTGGAGTGCAGTGGTG	7	ENST00000366374	105	hsa-miR-1285-3p	ENST00000366374	110	ENST00000505153&5631&16
68	CAGGCTGGAGTGCAGTGGTG	7	ENST00000573732	680	hsa-miR-1285-3p	ENST00000573732	685	ENST00000505153&5631&16
68	CAGGCTGGAGTGCAGTGGTG	7	ENST00000597720	680	hsa-miR-1285-3p	ENST00000597720	685	ENST00000505153&5631&16
68	CAGGCTGGAGTGCAGTGGTG	7	ENST00000598250	680	hsa-miR-1285-3p	ENST00000598250	685	ENST00000505153&5631&16
68	CAGGCTGGAGTGCAGTGGTG	7	ENST00000594995	680	hsa-miR-1285-3p	ENST00000594995	685	ENST00000505153&5631&16
68	CAGGCTGGAGTGCAGTGGTG	7	ENST00000598631	680	hsa-miR-1285-3p	ENST00000598631	685	ENST00000505153&5631&16
68	CAGGCTGGAGTGCAGTGGTG	7	ENST00000595501	248	hsa-miR-1273a	ENST00000595501	256	ENST00000505153&5631&16
68	CAGGCTGGAGTGCAGTGGTG	7	ENST00000562449	22	hsa-miR-1273a	ENST00000562449	30	ENST00000505153&5631&16
68	CAGGCTGGAGTGCAGTGGTG	7	ENST00000479136	28	hsa-miR-1273a	ENST00000479136	36	ENST00000505153&5631&16
68	CAGGCTGGAGTGCAGTGGTG	7	ENST00000529187	2814	hsa-miR-1273a	ENST00000529187	2822	ENST00000505153&5631&16
68	CAGGCTGGAGTGCAGTGGTG	7	ENST00000531346	2663	hsa-miR-1273a	ENST00000531346	2671	ENST00000505153&5631&16
68	CAGGCTGGAGTGCAGTGGTG	7	ENST00000375095	3030	hsa-miR-1273a	ENST00000375095	3038	ENST00000505153&5631&16
68	CAGGCTGGAGTGCAGTGGTG	7	ENST00000548189	88	hsa-miR-1273e	ENST00000548189	35	ENST00000505153&5631&16
68	CAGGCTGGAGTGCAGTGGTG	7	ENST00000553180	88	hsa-miR-1273e	ENST00000553180	35	ENST00000505153&5631&16
68	CAGGCTGGAGTGCAGTGGTG	7	ENST00000549082	88	hsa-miR-1273e	ENST00000549082	35	ENST00000505153&5631&16
68	CAGGCTGGAGTGCAGTGGTG	7	ENST00000552559	88	hsa-miR-1273e	ENST00000552559	35	ENST00000505153&5631&16
68	CAGGCTGGAGTGCAGTGGTG	7	ENST00000552807	88	hsa-miR-1273e	ENST00000552807	35	ENST00000505153&5631&16
68	CAGGCTGGAGTGCAGTGGTG	7	ENST00000552859	88	hsa-miR-1273e	ENST00000552859	35	ENST00000505153&5631&16
68	CAGGCTGGAGTGCAGTGGTG	7	ENST00000475411	2347	hsa-miR-1273e	ENST00000475411	2293	ENST00000505153&5631&16
68	CAGGCTGGAGTGCAGTGGTG	7	ENST00000485088	1523	hsa-miR-1273e	ENST00000485088	1469	ENST00000505153&5631&16
68	CAGGCTGGAGTGCAGTGGTG	7	ENST00000466582	1523	hsa-miR-1273e	ENST00000466582	1469	ENST00000505153&5631&16
68	CAGGCTGGAGTGCAGTGGTG	7	ENST00000455424	653	hsa-miR-1273g-3p	ENST00000455424	643	ENST00000505153&5631&16
68	CAGGCTGGAGTGCAGTGGTG	7	ENST00000600625	1956	hsa-miR-1273f	ENST00000600625	1915	ENST00000505153&5631&16
68	CAGGCTGGAGTGCAGTGGTG	7	ENST00000324894	2030	hsa-miR-1273f	ENST00000324894	1989	ENST00000505153&5631&16
68	CAGGCTGGAGTGCAGTGGTG	7	ENST00000559920	1086	hsa-miR-1273g-3p	ENST00000559920	1076	ENST00000505153&5631&16
68	CAGGCTGGAGTGCAGTGGTG	7	ENST00000519692	2175	hsa-miR-1273g-3p	ENST00000519692	2165	ENST00000505153&5631&16
68	CAGGCTGGAGTGCAGTGGTG	7	ENST00000462519	2298	hsa-miR-1273g-3p	ENST00000462519	2288	ENST00000505153&5631&16
68	CAGGCTGGAGTGCAGTGGTG	7	ENST00000336418	4080	hsa-miR-1273g-3p	ENST00000336418	4070	ENST00000505153&5631&16
68	CAGGCTGGAGTGCAGTGGTG	7	ENST00000520176	190	hsa-miR-1273g-3p	ENST00000520176	180	ENST00000505153&5631&16
68	CAGGCTGGAGTGCAGTGGTG	7	ENST00000324238	2058	hsa-miR-1273g-3p	ENST00000324238	2048	ENST00000505153&5631&16
68	CAGGCTGGAGTGCAGTGGTG	7	ENST00000315901	157	hsa-miR-1273g-3p	ENST00000315901	147	ENST00000505153&5631&16
68	CAGGCTGGAGTGCAGTGGTG	7	ENST00000512591	377	hsa-miR-1273g-3p	ENST00000512591	367	ENST00000505153&5631&16
68	CAGGCTGGAGTGCAGTGGTG	7	ENST00000312234	2139	hsa-miR-1273g-3p	ENST00000312234	2129	ENST00000505153&5631&16
68	CAGGCTGGAGTGCAGTGGTG	7	ENST00000526451	2013	hsa-miR-1273g-3p	ENST00000526451	2003	ENST00000505153&5631&16
68	CAGGCTGGAGTGCAGTGGTG	7	ENST00000492196	1431	hsa-miR-1273g-3p	ENST00000492196	1421	ENST00000505153&5631&16
68	CAGGCTGGAGTGCAGTGGTG	7	ENST00000487297	147	hsa-miR-1273g-3p	ENST00000487297	137	ENST00000505153&5631&16
68	CAGGCTGGAGTGCAGTGGTG	7	ENST00000465342	3042	hsa-miR-1273g-3p	ENST00000465342	3032	ENST00000505153&5631&16
68	CAGGCTGGAGTGCAGTGGTG	7	ENST00000339296	4827	hsa-miR-1273g-3p	ENST00000339296	4817	ENST00000505153&5631&16
68	CAGGCTGGAGTGCAGTGGTG	7	ENST00000487099	4438	hsa-miR-1273g-3p	ENST00000487099	4428	ENST00000505153&5631&16
68	CAGGCTGGAGTGCAGTGGTG	7	ENST00000590717	2615	hsa-miR-1273g-3p	ENST00000590717	2605	ENST00000505153&5631&16
68	CAGGCTGGAGTGCAGTGGTG	7	ENST00000589137	941	hsa-miR-1273g-3p	ENST00000589137	931	ENST00000505153&5631&16
68	CAGGCTGGAGTGCAGTGGTG	7	ENST00000396789	327	hsa-miR-1273g-3p	ENST00000396789	317	ENST00000505153&5631&16
68	CAGGCTGGAGTGCAGTGGTG	7	ENST00000507085	246	hsa-miR-1273g-3p	ENST00000507085	236	ENST00000505153&5631&16
68	CAGGCTGGAGTGCAGTGGTG	7	ENST00000508844	282	hsa-miR-1273g-3p	ENST00000508844	272	ENST00000505153&5631&16
68	CAGGCTGGAGTGCAGTGGTG	7	ENST00000522777	542	hsa-miR-1273g-3p	ENST00000522777	532	ENST00000505153&5631&16
68	CAGGCTGGAGTGCAGTGGTG	7	ENST00000464609	31	hsa-miR-1273g-3p	ENST00000464609	21	ENST00000505153&5631&16
68	CAGGCTGGAGTGCAGTGGTG	7	ENST00000600850	868	hsa-miR-1273g-3p	ENST00000600850	858	ENST00000505153&5631&16
68	CAGGCTGGAGTGCAGTGGTG	7	ENST00000573007	297	hsa-miR-1273g-3p	ENST00000573007	287	ENST00000505153&5631&16
68	CAGGCTGGAGTGCAGTGGTG	7	ENST00000435295	749	hsa-miR-1273g-3p	ENST00000435295	739	ENST00000505153&5631&16
68	CAGGCTGGAGTGCAGTGGTG	7	ENST00000433033	166	hsa-miR-1273g-3p	ENST00000433033	156	ENST00000505153&5631&16
68	CAGGCTGGAGTGCAGTGGTG	7	ENST00000562965	705	hsa-miR-1273g-3p	ENST00000562965	695	ENST00000505153&5631&16
68	CAGGCTGGAGTGCAGTGGTG	7	ENST00000414795	460	hsa-miR-1273g-3p	ENST00000414795	450	ENST00000505153&5631&16
69	GGGAGGCTGAGGCAGGAGGA	2	ENST00000378845	1389	hsa-miR-5096	ENST00000378845	1329	ENST00000570974&371&13	ENST00000534904&3142&13	ENST00000565600&219&13	ENST00000366398&387&20	ENST00000343767&899&20	ENST00000563580&487&13	ENST00000422340&292&20	ENST00000550899&445&20	ENST00000547787&287&20	ENST00000508173&5137&20	ENST00000255266&5073&20
70	TAGTAGAGACGGGGTTTCA	3	ENST00000529187	2814	hsa-miR-1273a	ENST00000529187	2959	ENST00000595054&919&23
70	TAGTAGAGACGGGGTTTCA	3	ENST00000531346	2663	hsa-miR-1273a	ENST00000531346	2808	ENST00000595054&919&23
70	TAGTAGAGACGGGGTTTCA	3	ENST00000375095	3030	hsa-miR-1273a	ENST00000375095	3175	ENST00000595054&919&23
70	TAGTAGAGACGGGGTTTCA	3	ENST00000504241	1914	hsa-miR-1273a	ENST00000504241	2068	ENST00000595054&919&23
70	TAGTAGAGACGGGGTTTCA	3	ENST00000275053	6737	hsa-miR-1273a	ENST00000275053	6885	ENST00000595054&919&23
70	TAGTAGAGACGGGGTTTCA	3	ENST00000357137	6056	hsa-miR-1273a	ENST00000357137	5917	ENST00000595054&919&23
70	TAGTAGAGACGGGGTTTCA	3	ENST00000285071	3341	hsa-miR-1972	ENST00000285071	3226	ENST00000595054&919&23
70	TAGTAGAGACGGGGTTTCA	3	ENST00000568928	958	hsa-miR-1273e	ENST00000568928	1041	ENST00000595054&919&23
70	TAGTAGAGACGGGGTTTCA	3	ENST00000450492	111	hsa-miR-1273e	ENST00000450492	190	ENST00000595054&919&23
70	TAGTAGAGACGGGGTTTCA	3	ENST00000319637	1316	hsa-miR-1273e	ENST00000319637	1399	ENST00000595054&919&23
70	TAGTAGAGACGGGGTTTCA	3	ENST00000527806	1530	hsa-miR-1273e	ENST00000527806	1613	ENST00000595054&919&23
70	TAGTAGAGACGGGGTTTCA	3	ENST00000281031	2115	hsa-miR-1273e	ENST00000281031	2198	ENST00000595054&919&23
70	TAGTAGAGACGGGGTTTCA	3	ENST00000599628	1486	hsa-miR-1273e	ENST00000599628	1118	ENST00000595054&919&23
70	TAGTAGAGACGGGGTTTCA	3	ENST00000523129	1746	hsa-miR-1273g-3p	ENST00000523129	1580	ENST00000595054&919&23
70	TAGTAGAGACGGGGTTTCA	3	ENST00000416209	1746	hsa-miR-1273g-3p	ENST00000416209	1580	ENST00000595054&919&23
70	TAGTAGAGACGGGGTTTCA	3	ENST00000518639	956	hsa-miR-1273g-3p	ENST00000518639	1083	ENST00000595054&919&23
70	TAGTAGAGACGGGGTTTCA	3	ENST00000396789	327	hsa-miR-1273g-3p	ENST00000396789	454	ENST00000595054&919&23
71	GGTTCAAGCAATTCTCCCACCTCAGC	2	ENST00000519692	2175	hsa-miR-1273g-3p	ENST00000519692	2217	ENST00000576014&1177&10	ENST00000355100&7340&10	ENST00000352732&7387&10	ENST00000257696&775&10	ENST00000435296&703&10	ENST00000572085&5500&19	ENST00000490528&1323&18	ENST00000292566&1427&18	ENST00000373021&2650&10	ENST00000329454&2966&10	ENST00000422132&6887&10	ENST00000489130&141&18	ENST00000591490&3354&10	ENST00000367160&2730&10	ENST00000367162&3720&10	ENST00000367161&3585&10	ENST00000571133&1894&14	ENST00000555848&254&17	ENST00000337841&844&10	ENST00000473688&2565&18	ENST00000477053&2483&18	ENST00000383233&2558&18	ENST00000475185&1970&18	ENST00000537473&1659&18	ENST00000335387&2962&10	ENST00000593154&2261&10	ENST00000253680&2260&10	ENST00000397372&1921&10	ENST00000589463&2374&10	ENST00000588246&1847&10	ENST00000412055&3383&12	ENST00000356126&3127&18
72	CGGCTCACTGCAAGCTCCGCCTC	2	ENST00000599628	1486	hsa-miR-1273e	ENST00000599628	1007	ENST00000538629&5509&40	ENST00000574727&4267&69	ENST00000426371&1068&69	ENST00000424133&2434&69	ENST00000425214&533&69	ENST00000505256&3476&10	ENST00000401725&723&10	ENST00000576928&2648&69	ENST00000574314&2565&69	ENST00000573669&1680&69	ENST00000493181&6455&10	ENST00000436928&282&69	ENST00000265715&4443&69	ENST00000400331&5080&69	ENST00000265641&4666&40	ENST00000565402&40&69	ENST00000396307&2949&69	ENST00000502505&2841&69	ENST00000370823&2870&35	ENST00000467101&2755&35	ENST00000295628&6183&10	ENST00000391743&2565&69	ENST00000456960&1680&69	ENST00000360737&2227&69	ENST00000526794&6664&69	ENST00000562801&1005&69	ENST00000481276&2141&69	ENST00000372164&4725&10	ENST00000429989&4940&10	ENST00000492342&262&10	ENST00000564218&1874&69	ENST00000547440&1837&69	ENST00000592115&413&10	ENST00000546474&13325&10	ENST00000471668&1683&10	ENST00000389467&13100&69	ENST00000565324&12404&69	ENST00000446231&13147&69	ENST00000221444&3829&69	ENST00000590993&5238&69	ENST00000366113&752&69	ENST00000293272&873&69
72	CGGCTCACTGCAAGCTCCGCCTC	2	ENST00000509563	379	hsa-miR-1273g-3p	ENST00000509563	395	ENST00000538629&5509&40	ENST00000574727&4267&69	ENST00000426371&1068&69	ENST00000424133&2434&69	ENST00000425214&533&69	ENST00000505256&3476&10	ENST00000401725&723&10	ENST00000576928&2648&69	ENST00000574314&2565&69	ENST00000573669&1680&69	ENST00000493181&6455&10	ENST00000436928&282&69	ENST00000265715&4443&69	ENST00000400331&5080&69	ENST00000265641&4666&40	ENST00000565402&40&69	ENST00000396307&2949&69	ENST00000502505&2841&69	ENST00000370823&2870&35	ENST00000467101&2755&35	ENST00000295628&6183&10	ENST00000391743&2565&69	ENST00000456960&1680&69	ENST00000360737&2227&69	ENST00000526794&6664&69	ENST00000562801&1005&69	ENST00000481276&2141&69	ENST00000372164&4725&10	ENST00000429989&4940&10	ENST00000492342&262&10	ENST00000564218&1874&69	ENST00000547440&1837&69	ENST00000592115&413&10	ENST00000546474&13325&10	ENST00000471668&1683&10	ENST00000389467&13100&69	ENST00000565324&12404&69	ENST00000446231&13147&69	ENST00000221444&3829&69	ENST00000590993&5238&69	ENST00000366113&752&69	ENST00000293272&873&69
72	CGGCTCACTGCAAGCTCCGCCTC	2	ENST00000562965	705	hsa-miR-1273g-3p	ENST00000562965	721	ENST00000538629&5509&40	ENST00000574727&4267&69	ENST00000426371&1068&69	ENST00000424133&2434&69	ENST00000425214&533&69	ENST00000505256&3476&10	ENST00000401725&723&10	ENST00000576928&2648&69	ENST00000574314&2565&69	ENST00000573669&1680&69	ENST00000493181&6455&10	ENST00000436928&282&69	ENST00000265715&4443&69	ENST00000400331&5080&69	ENST00000265641&4666&40	ENST00000565402&40&69	ENST00000396307&2949&69	ENST00000502505&2841&69	ENST00000370823&2870&35	ENST00000467101&2755&35	ENST00000295628&6183&10	ENST00000391743&2565&69	ENST00000456960&1680&69	ENST00000360737&2227&69	ENST00000526794&6664&69	ENST00000562801&1005&69	ENST00000481276&2141&69	ENST00000372164&4725&10	ENST00000429989&4940&10	ENST00000492342&262&10	ENST00000564218&1874&69	ENST00000547440&1837&69	ENST00000592115&413&10	ENST00000546474&13325&10	ENST00000471668&1683&10	ENST00000389467&13100&69	ENST00000565324&12404&69	ENST00000446231&13147&69	ENST00000221444&3829&69	ENST00000590993&5238&69	ENST00000366113&752&69	ENST00000293272&873&69
73	CTGTCACCAGGCTGGAGTG	3	ENST00000563972	987	hsa-miR-1972	ENST00000563972	1215	ENST00000565611&5052&16	ENST00000565500&4087&16	ENST00000565380&5029&16	ENST00000263805&7514&16	ENST00000312026&3558&16	ENST00000579489&194&16	ENST00000592002&2907&16	ENST00000524119&2791&16	ENST00000451653&3024&16
73	CTGTCACCAGGCTGGAGTG	3	ENST00000548189	88	hsa-miR-1273e	ENST00000548189	28	ENST00000565611&5052&16	ENST00000565500&4087&16	ENST00000565380&5029&16	ENST00000263805&7514&16	ENST00000312026&3558&16	ENST00000579489&194&16	ENST00000592002&2907&16	ENST00000524119&2791&16	ENST00000451653&3024&16
73	CTGTCACCAGGCTGGAGTG	3	ENST00000553180	88	hsa-miR-1273e	ENST00000553180	28	ENST00000565611&5052&16	ENST00000565500&4087&16	ENST00000565380&5029&16	ENST00000263805&7514&16	ENST00000312026&3558&16	ENST00000579489&194&16	ENST00000592002&2907&16	ENST00000524119&2791&16	ENST00000451653&3024&16
73	CTGTCACCAGGCTGGAGTG	3	ENST00000549082	88	hsa-miR-1273e	ENST00000549082	28	ENST00000565611&5052&16	ENST00000565500&4087&16	ENST00000565380&5029&16	ENST00000263805&7514&16	ENST00000312026&3558&16	ENST00000579489&194&16	ENST00000592002&2907&16	ENST00000524119&2791&16	ENST00000451653&3024&16
73	CTGTCACCAGGCTGGAGTG	3	ENST00000552559	88	hsa-miR-1273e	ENST00000552559	28	ENST00000565611&5052&16	ENST00000565500&4087&16	ENST00000565380&5029&16	ENST00000263805&7514&16	ENST00000312026&3558&16	ENST00000579489&194&16	ENST00000592002&2907&16	ENST00000524119&2791&16	ENST00000451653&3024&16
73	CTGTCACCAGGCTGGAGTG	3	ENST00000552807	88	hsa-miR-1273e	ENST00000552807	28	ENST00000565611&5052&16	ENST00000565500&4087&16	ENST00000565380&5029&16	ENST00000263805&7514&16	ENST00000312026&3558&16	ENST00000579489&194&16	ENST00000592002&2907&16	ENST00000524119&2791&16	ENST00000451653&3024&16
73	CTGTCACCAGGCTGGAGTG	3	ENST00000552859	88	hsa-miR-1273e	ENST00000552859	28	ENST00000565611&5052&16	ENST00000565500&4087&16	ENST00000565380&5029&16	ENST00000263805&7514&16	ENST00000312026&3558&16	ENST00000579489&194&16	ENST00000592002&2907&16	ENST00000524119&2791&16	ENST00000451653&3024&16
74	CGATCTTGGCTCACTGCAACCTCCAC	2	ENST00000515103	627	hsa-miR-1273e	ENST00000515103	593	ENST00000510711&1750&69	ENST00000368917&3192&13	ENST00000368918&3721&10	ENST00000368918&3306&13	ENST00000472953&312&11	ENST00000420274&3638&10	ENST00000521784&3548&10	ENST00000388745&3583&10	ENST00000592502&1702&10	ENST00000354105&2463&11	ENST00000478047&2531&11	ENST00000468709&2232&11	ENST00000339834&758&10	ENST00000222803&2242&11	ENST00000343010&4199&69	ENST00000479673&3110&69	ENST00000570503&1463&10	ENST00000576908&1497&10	ENST00000573234&1340&10	ENST00000529694&2922&10	ENST00000234800&3901&69	ENST00000378662&4235&69	ENST00000373836&3296&69	ENST00000373836&3762&11	ENST00000373836&4834&69	ENST00000373839&3313&69	ENST00000373839&3779&11	ENST00000373839&4851&69	ENST00000504192&1282&10	ENST00000371384&1981&10	ENST00000586372&3000&10	ENST00000586372&3571&69	ENST00000356725&2585&11	ENST00000512439&4205&69	ENST00000309486&6551&11	ENST00000351666&2881&11	ENST00000346315&5888&11	ENST00000352993&3217&11	ENST00000354071&5848&11	ENST00000468300&3219&11	ENST00000357654&6530&11	ENST00000589275&1736&69
74	CGATCTTGGCTCACTGCAACCTCCAC	2	ENST00000453192	345	hsa-miR-1273e	ENST00000453192	311	ENST00000510711&1750&69	ENST00000368917&3192&13	ENST00000368918&3721&10	ENST00000368918&3306&13	ENST00000472953&312&11	ENST00000420274&3638&10	ENST00000521784&3548&10	ENST00000388745&3583&10	ENST00000592502&1702&10	ENST00000354105&2463&11	ENST00000478047&2531&11	ENST00000468709&2232&11	ENST00000339834&758&10	ENST00000222803&2242&11	ENST00000343010&4199&69	ENST00000479673&3110&69	ENST00000570503&1463&10	ENST00000576908&1497&10	ENST00000573234&1340&10	ENST00000529694&2922&10	ENST00000234800&3901&69	ENST00000378662&4235&69	ENST00000373836&3296&69	ENST00000373836&3762&11	ENST00000373836&4834&69	ENST00000373839&3313&69	ENST00000373839&3779&11	ENST00000373839&4851&69	ENST00000504192&1282&10	ENST00000371384&1981&10	ENST00000586372&3000&10	ENST00000586372&3571&69	ENST00000356725&2585&11	ENST00000512439&4205&69	ENST00000309486&6551&11	ENST00000351666&2881&11	ENST00000346315&5888&11	ENST00000352993&3217&11	ENST00000354071&5848&11	ENST00000468300&3219&11	ENST00000357654&6530&11	ENST00000589275&1736&69
74	CGATCTTGGCTCACTGCAACCTCCAC	2	ENST00000449896	345	hsa-miR-1273e	ENST00000449896	311	ENST00000510711&1750&69	ENST00000368917&3192&13	ENST00000368918&3721&10	ENST00000368918&3306&13	ENST00000472953&312&11	ENST00000420274&3638&10	ENST00000521784&3548&10	ENST00000388745&3583&10	ENST00000592502&1702&10	ENST00000354105&2463&11	ENST00000478047&2531&11	ENST00000468709&2232&11	ENST00000339834&758&10	ENST00000222803&2242&11	ENST00000343010&4199&69	ENST00000479673&3110&69	ENST00000570503&1463&10	ENST00000576908&1497&10	ENST00000573234&1340&10	ENST00000529694&2922&10	ENST00000234800&3901&69	ENST00000378662&4235&69	ENST00000373836&3296&69	ENST00000373836&3762&11	ENST00000373836&4834&69	ENST00000373839&3313&69	ENST00000373839&3779&11	ENST00000373839&4851&69	ENST00000504192&1282&10	ENST00000371384&1981&10	ENST00000586372&3000&10	ENST00000586372&3571&69	ENST00000356725&2585&11	ENST00000512439&4205&69	ENST00000309486&6551&11	ENST00000351666&2881&11	ENST00000346315&5888&11	ENST00000352993&3217&11	ENST00000354071&5848&11	ENST00000468300&3219&11	ENST00000357654&6530&11	ENST00000589275&1736&69
74	CGATCTTGGCTCACTGCAACCTCCAC	2	ENST00000540033	4651	hsa-miR-1273g-3p	ENST00000540033	4661	ENST00000510711&1750&69	ENST00000368917&3192&13	ENST00000368918&3721&10	ENST00000368918&3306&13	ENST00000472953&312&11	ENST00000420274&3638&10	ENST00000521784&3548&10	ENST00000388745&3583&10	ENST00000592502&1702&10	ENST00000354105&2463&11	ENST00000478047&2531&11	ENST00000468709&2232&11	ENST00000339834&758&10	ENST00000222803&2242&11	ENST00000343010&4199&69	ENST00000479673&3110&69	ENST00000570503&1463&10	ENST00000576908&1497&10	ENST00000573234&1340&10	ENST00000529694&2922&10	ENST00000234800&3901&69	ENST00000378662&4235&69	ENST00000373836&3296&69	ENST00000373836&3762&11	ENST00000373836&4834&69	ENST00000373839&3313&69	ENST00000373839&3779&11	ENST00000373839&4851&69	ENST00000504192&1282&10	ENST00000371384&1981&10	ENST00000586372&3000&10	ENST00000586372&3571&69	ENST00000356725&2585&11	ENST00000512439&4205&69	ENST00000309486&6551&11	ENST00000351666&2881&11	ENST00000346315&5888&11	ENST00000352993&3217&11	ENST00000354071&5848&11	ENST00000468300&3219&11	ENST00000357654&6530&11	ENST00000589275&1736&69
74	CGATCTTGGCTCACTGCAACCTCCAC	2	ENST00000370331	4685	hsa-miR-1273g-3p	ENST00000370331	4695	ENST00000510711&1750&69	ENST00000368917&3192&13	ENST00000368918&3721&10	ENST00000368918&3306&13	ENST00000472953&312&11	ENST00000420274&3638&10	ENST00000521784&3548&10	ENST00000388745&3583&10	ENST00000592502&1702&10	ENST00000354105&2463&11	ENST00000478047&2531&11	ENST00000468709&2232&11	ENST00000339834&758&10	ENST00000222803&2242&11	ENST00000343010&4199&69	ENST00000479673&3110&69	ENST00000570503&1463&10	ENST00000576908&1497&10	ENST00000573234&1340&10	ENST00000529694&2922&10	ENST00000234800&3901&69	ENST00000378662&4235&69	ENST00000373836&3296&69	ENST00000373836&3762&11	ENST00000373836&4834&69	ENST00000373839&3313&69	ENST00000373839&3779&11	ENST00000373839&4851&69	ENST00000504192&1282&10	ENST00000371384&1981&10	ENST00000586372&3000&10	ENST00000586372&3571&69	ENST00000356725&2585&11	ENST00000512439&4205&69	ENST00000309486&6551&11	ENST00000351666&2881&11	ENST00000346315&5888&11	ENST00000352993&3217&11	ENST00000354071&5848&11	ENST00000468300&3219&11	ENST00000357654&6530&11	ENST00000589275&1736&69
75	GAGGCTGAGGCAGGAGAATCG	2	ENST00000562760	1006	hsa-miR-5096	ENST00000562760	1084	ENST00000565050&823&15	ENST00000568776&621&15	ENST00000601343&682&15	ENST00000565600&219&13
75	GAGGCTGAGGCAGGAGAATCG	2	ENST00000343526	6933	hsa-miR-5096	ENST00000343526	7011	ENST00000565050&823&15	ENST00000568776&621&15	ENST00000601343&682&15	ENST00000565600&219&13
75	GAGGCTGAGGCAGGAGAATCG	2	ENST00000510711	1229	hsa-miR-5096	ENST00000510711	1317	ENST00000565050&823&15	ENST00000568776&621&15	ENST00000601343&682&15	ENST00000565600&219&13
75	GAGGCTGAGGCAGGAGAATCG	2	ENST00000409982	830	hsa-miR-5096	ENST00000409982	908	ENST00000565050&823&15	ENST00000568776&621&15	ENST00000601343&682&15	ENST00000565600&219&13
75	GAGGCTGAGGCAGGAGAATCG	2	ENST00000370791	5077	hsa-miR-5096	ENST00000370791	5155	ENST00000565050&823&15	ENST00000568776&621&15	ENST00000601343&682&15	ENST00000565600&219&13
75	GAGGCTGAGGCAGGAGAATCG	2	ENST00000370799	1539	hsa-miR-5096	ENST00000370799	1616	ENST00000565050&823&15	ENST00000568776&621&15	ENST00000601343&682&15	ENST00000565600&219&13
75	GAGGCTGAGGCAGGAGAATCG	2	ENST00000590227	422	hsa-miR-5096	ENST00000590227	487	ENST00000565050&823&15	ENST00000568776&621&15	ENST00000601343&682&15	ENST00000565600&219&13
75	GAGGCTGAGGCAGGAGAATCG	2	ENST00000563793	203	hsa-miR-5096	ENST00000563793	284	ENST00000565050&823&15	ENST00000568776&621&15	ENST00000601343&682&15	ENST00000565600&219&13
75	GAGGCTGAGGCAGGAGAATCG	2	ENST00000296318	8096	hsa-miR-5096	ENST00000296318	8173	ENST00000565050&823&15	ENST00000568776&621&15	ENST00000601343&682&15	ENST00000565600&219&13
75	GAGGCTGAGGCAGGAGAATCG	2	ENST00000600410	2247	hsa-miR-5096	ENST00000600410	2324	ENST00000565050&823&15	ENST00000568776&621&15	ENST00000601343&682&15	ENST00000565600&219&13
75	GAGGCTGAGGCAGGAGAATCG	2	ENST00000563945	298	hsa-miR-5096	ENST00000563945	375	ENST00000565050&823&15	ENST00000568776&621&15	ENST00000601343&682&15	ENST00000565600&219&13
75	GAGGCTGAGGCAGGAGAATCG	2	ENST00000318348	1249	hsa-miR-5096	ENST00000318348	1328	ENST00000565050&823&15	ENST00000568776&621&15	ENST00000601343&682&15	ENST00000565600&219&13
75	GAGGCTGAGGCAGGAGAATCG	2	ENST00000576086	799	hsa-miR-5585-3p	ENST00000576086	808	ENST00000565050&823&15	ENST00000568776&621&15	ENST00000601343&682&15	ENST00000565600&219&13
75	GAGGCTGAGGCAGGAGAATCG	2	ENST00000423644	4475	hsa-miR-5585-3p	ENST00000423644	4484	ENST00000565050&823&15	ENST00000568776&621&15	ENST00000601343&682&15	ENST00000565600&219&13
75	GAGGCTGAGGCAGGAGAATCG	2	ENST00000359484	4348	hsa-miR-5585-3p	ENST00000359484	4357	ENST00000565050&823&15	ENST00000568776&621&15	ENST00000601343&682&15	ENST00000565600&219&13
75	GAGGCTGAGGCAGGAGAATCG	2	ENST00000346834	4411	hsa-miR-5585-3p	ENST00000346834	4420	ENST00000565050&823&15	ENST00000568776&621&15	ENST00000601343&682&15	ENST00000565600&219&13
75	GAGGCTGAGGCAGGAGAATCG	2	ENST00000480696	437	hsa-miR-5585-3p	ENST00000480696	446	ENST00000565050&823&15	ENST00000568776&621&15	ENST00000601343&682&15	ENST00000565600&219&13
75	GAGGCTGAGGCAGGAGAATCG	2	ENST00000394019	4654	hsa-miR-5585-3p	ENST00000394019	4663	ENST00000565050&823&15	ENST00000568776&621&15	ENST00000601343&682&15	ENST00000565600&219&13
75	GAGGCTGAGGCAGGAGAATCG	2	ENST00000483195	4882	hsa-miR-5585-3p	ENST00000483195	4891	ENST00000565050&823&15	ENST00000568776&621&15	ENST00000601343&682&15	ENST00000565600&219&13
75	GAGGCTGAGGCAGGAGAATCG	2	ENST00000597411	656	hsa-miR-5585-3p	ENST00000597411	665	ENST00000565050&823&15	ENST00000568776&621&15	ENST00000601343&682&15	ENST00000565600&219&13
75	GAGGCTGAGGCAGGAGAATCG	2	ENST00000465069	250	hsa-miR-5585-3p	ENST00000465069	259	ENST00000565050&823&15	ENST00000568776&621&15	ENST00000601343&682&15	ENST00000565600&219&13
75	GAGGCTGAGGCAGGAGAATCG	2	ENST00000340681	393	hsa-miR-5585-3p	ENST00000340681	402	ENST00000565050&823&15	ENST00000568776&621&15	ENST00000601343&682&15	ENST00000565600&219&13
75	GAGGCTGAGGCAGGAGAATCG	2	ENST00000337963	2781	hsa-miR-5585-3p	ENST00000337963	2790	ENST00000565050&823&15	ENST00000568776&621&15	ENST00000601343&682&15	ENST00000565600&219&13
75	GAGGCTGAGGCAGGAGAATCG	2	ENST00000502168	2486	hsa-miR-5585-3p	ENST00000502168	2495	ENST00000565050&823&15	ENST00000568776&621&15	ENST00000601343&682&15	ENST00000565600&219&13
75	GAGGCTGAGGCAGGAGAATCG	2	ENST00000535942	2711	hsa-miR-5585-3p	ENST00000535942	2720	ENST00000565050&823&15	ENST00000568776&621&15	ENST00000601343&682&15	ENST00000565600&219&13
75	GAGGCTGAGGCAGGAGAATCG	2	ENST00000382909	2372	hsa-miR-5585-3p	ENST00000382909	2381	ENST00000565050&823&15	ENST00000568776&621&15	ENST00000601343&682&15	ENST00000565600&219&13
75	GAGGCTGAGGCAGGAGAATCG	2	ENST00000358661	2505	hsa-miR-5585-3p	ENST00000358661	2514	ENST00000565050&823&15	ENST00000568776&621&15	ENST00000601343&682&15	ENST00000565600&219&13
75	GAGGCTGAGGCAGGAGAATCG	2	ENST00000354278	3231	hsa-miR-5585-3p	ENST00000354278	3240	ENST00000565050&823&15	ENST00000568776&621&15	ENST00000601343&682&15	ENST00000565600&219&13
75	GAGGCTGAGGCAGGAGAATCG	2	ENST00000351894	3402	hsa-miR-5585-3p	ENST00000351894	3411	ENST00000565050&823&15	ENST00000568776&621&15	ENST00000601343&682&15	ENST00000565600&219&13
75	GAGGCTGAGGCAGGAGAATCG	2	ENST00000535162	3567	hsa-miR-5585-3p	ENST00000535162	3576	ENST00000565050&823&15	ENST00000568776&621&15	ENST00000601343&682&15	ENST00000565600&219&13
75	GAGGCTGAGGCAGGAGAATCG	2	ENST00000324134	3687	hsa-miR-5585-3p	ENST00000324134	3696	ENST00000565050&823&15	ENST00000568776&621&15	ENST00000601343&682&15	ENST00000565600&219&13
76	TGGGAGGCCAAGGCGGGCG	2	ENST00000491289	4196	hsa-miR-5096	ENST00000491289	4000	ENST00000524337&66&11	ENST00000565186&184&13	ENST00000554767&594&11	ENST00000370315&2703&13	ENST00000373816&4514&11	ENST00000339775&549&11	ENST00000561702&595&20	ENST00000588831&72&20	ENST00000585876&264&20	ENST00000369580&1832&20	ENST00000397061&1829&11	ENST00000348031&101&20	ENST00000217173&101&20	ENST00000592540&1290&13	ENST00000581655&446&20	ENST00000585026&226&20	ENST00000581660&236&20	ENST00000397036&833&11	ENST00000391854&3848&11	ENST00000450593&3722&11	ENST00000579685&141&20	ENST00000483199&195&11	ENST00000412969&1072&20	ENST00000471884&1303&20	ENST00000476500&1173&20	ENST00000597777&571&20	ENST00000474465&350&20	ENST00000569852&494&20	ENST00000585921&180&13	ENST00000555861&1293&20	ENST00000555861&999&13	ENST00000501927&2203&13	ENST00000502041&1546&13	ENST00000500148&1701&13	ENST00000510782&2885&20	ENST00000174621&3694&13	ENST00000399756&3937&13	ENST00000571088&3624&13	ENST00000399759&3611&13	ENST00000572705&3685&13	ENST00000492996&1281&20	ENST00000522048&421&11
76	TGGGAGGCCAAGGCGGGCG	2	ENST00000575379	820	hsa-miR-5095	ENST00000575379	840	ENST00000524337&66&11	ENST00000565186&184&13	ENST00000554767&594&11	ENST00000370315&2703&13	ENST00000373816&4514&11	ENST00000339775&549&11	ENST00000561702&595&20	ENST00000588831&72&20	ENST00000585876&264&20	ENST00000369580&1832&20	ENST00000397061&1829&11	ENST00000348031&101&20	ENST00000217173&101&20	ENST00000592540&1290&13	ENST00000581655&446&20	ENST00000585026&226&20	ENST00000581660&236&20	ENST00000397036&833&11	ENST00000391854&3848&11	ENST00000450593&3722&11	ENST00000579685&141&20	ENST00000483199&195&11	ENST00000412969&1072&20	ENST00000471884&1303&20	ENST00000476500&1173&20	ENST00000597777&571&20	ENST00000474465&350&20	ENST00000569852&494&20	ENST00000585921&180&13	ENST00000555861&1293&20	ENST00000555861&999&13	ENST00000501927&2203&13	ENST00000502041&1546&13	ENST00000500148&1701&13	ENST00000510782&2885&20	ENST00000174621&3694&13	ENST00000399756&3937&13	ENST00000571088&3624&13	ENST00000399759&3611&13	ENST00000572705&3685&13	ENST00000492996&1281&20	ENST00000522048&421&11
76	TGGGAGGCCAAGGCGGGCG	2	ENST00000576360	1576	hsa-miR-5095	ENST00000576360	1596	ENST00000524337&66&11	ENST00000565186&184&13	ENST00000554767&594&11	ENST00000370315&2703&13	ENST00000373816&4514&11	ENST00000339775&549&11	ENST00000561702&595&20	ENST00000588831&72&20	ENST00000585876&264&20	ENST00000369580&1832&20	ENST00000397061&1829&11	ENST00000348031&101&20	ENST00000217173&101&20	ENST00000592540&1290&13	ENST00000581655&446&20	ENST00000585026&226&20	ENST00000581660&236&20	ENST00000397036&833&11	ENST00000391854&3848&11	ENST00000450593&3722&11	ENST00000579685&141&20	ENST00000483199&195&11	ENST00000412969&1072&20	ENST00000471884&1303&20	ENST00000476500&1173&20	ENST00000597777&571&20	ENST00000474465&350&20	ENST00000569852&494&20	ENST00000585921&180&13	ENST00000555861&1293&20	ENST00000555861&999&13	ENST00000501927&2203&13	ENST00000502041&1546&13	ENST00000500148&1701&13	ENST00000510782&2885&20	ENST00000174621&3694&13	ENST00000399756&3937&13	ENST00000571088&3624&13	ENST00000399759&3611&13	ENST00000572705&3685&13	ENST00000492996&1281&20	ENST00000522048&421&11
76	TGGGAGGCCAAGGCGGGCG	2	ENST00000306071	1904	hsa-miR-5095	ENST00000306071	1924	ENST00000524337&66&11	ENST00000565186&184&13	ENST00000554767&594&11	ENST00000370315&2703&13	ENST00000373816&4514&11	ENST00000339775&549&11	ENST00000561702&595&20	ENST00000588831&72&20	ENST00000585876&264&20	ENST00000369580&1832&20	ENST00000397061&1829&11	ENST00000348031&101&20	ENST00000217173&101&20	ENST00000592540&1290&13	ENST00000581655&446&20	ENST00000585026&226&20	ENST00000581660&236&20	ENST00000397036&833&11	ENST00000391854&3848&11	ENST00000450593&3722&11	ENST00000579685&141&20	ENST00000483199&195&11	ENST00000412969&1072&20	ENST00000471884&1303&20	ENST00000476500&1173&20	ENST00000597777&571&20	ENST00000474465&350&20	ENST00000569852&494&20	ENST00000585921&180&13	ENST00000555861&1293&20	ENST00000555861&999&13	ENST00000501927&2203&13	ENST00000502041&1546&13	ENST00000500148&1701&13	ENST00000510782&2885&20	ENST00000174621&3694&13	ENST00000399756&3937&13	ENST00000571088&3624&13	ENST00000399759&3611&13	ENST00000572705&3685&13	ENST00000492996&1281&20	ENST00000522048&421&11
77	GATCACAAGGTCAGGAGT	4	ENST00000542023	928	hsa-miR-5096	ENST00000542023	889	ENST00000600590&609&10	ENST00000597894&476&10	ENST00000443839&1601&11	ENST00000580536&1652&11	ENST00000429591&2393&11	ENST00000489512&1652&11	ENST00000392373&1694&10	ENST00000261653&1640&10	ENST00000361138&5506&11	ENST00000300107&3283&10	ENST00000569540&2098&11	ENST00000357613&2066&11	ENST00000422340&273&10	ENST00000550899&426&10	ENST00000547787&268&10	ENST00000368761&3788&11	ENST00000560637&2283&10	ENST00000261517&11988&10	ENST00000249837&11884&10	ENST00000597553&1488&11	ENST00000517385&565&11	ENST00000436793&34&10	ENST00000382892&34&10	ENST00000382891&34&10	ENST00000353275&34&10	ENST00000553632&290&11	ENST00000587077&836&10	ENST00000296292&4685&10	ENST00000378230&5896&11	ENST00000578975&1210&10	ENST00000476266&385&10	ENST00000367619&3936&10	ENST00000526731&2167&11	ENST00000393389&3003&11	ENST00000499879&4619&11	ENST00000372806&4836&11	ENST00000453904&1920&11	ENST00000311630&5018&10	ENST00000492535&1937&11
77	GATCACAAGGTCAGGAGT	4	ENST00000240652	871	hsa-miR-5096	ENST00000240652	832	ENST00000600590&609&10	ENST00000597894&476&10	ENST00000443839&1601&11	ENST00000580536&1652&11	ENST00000429591&2393&11	ENST00000489512&1652&11	ENST00000392373&1694&10	ENST00000261653&1640&10	ENST00000361138&5506&11	ENST00000300107&3283&10	ENST00000569540&2098&11	ENST00000357613&2066&11	ENST00000422340&273&10	ENST00000550899&426&10	ENST00000547787&268&10	ENST00000368761&3788&11	ENST00000560637&2283&10	ENST00000261517&11988&10	ENST00000249837&11884&10	ENST00000597553&1488&11	ENST00000517385&565&11	ENST00000436793&34&10	ENST00000382892&34&10	ENST00000382891&34&10	ENST00000353275&34&10	ENST00000553632&290&11	ENST00000587077&836&10	ENST00000296292&4685&10	ENST00000378230&5896&11	ENST00000578975&1210&10	ENST00000476266&385&10	ENST00000367619&3936&10	ENST00000526731&2167&11	ENST00000393389&3003&11	ENST00000499879&4619&11	ENST00000372806&4836&11	ENST00000453904&1920&11	ENST00000311630&5018&10	ENST00000492535&1937&11
77	GATCACAAGGTCAGGAGT	4	ENST00000471863	2080	hsa-miR-5096	ENST00000471863	2041	ENST00000600590&609&10	ENST00000597894&476&10	ENST00000443839&1601&11	ENST00000580536&1652&11	ENST00000429591&2393&11	ENST00000489512&1652&11	ENST00000392373&1694&10	ENST00000261653&1640&10	ENST00000361138&5506&11	ENST00000300107&3283&10	ENST00000569540&2098&11	ENST00000357613&2066&11	ENST00000422340&273&10	ENST00000550899&426&10	ENST00000547787&268&10	ENST00000368761&3788&11	ENST00000560637&2283&10	ENST00000261517&11988&10	ENST00000249837&11884&10	ENST00000597553&1488&11	ENST00000517385&565&11	ENST00000436793&34&10	ENST00000382892&34&10	ENST00000382891&34&10	ENST00000353275&34&10	ENST00000553632&290&11	ENST00000587077&836&10	ENST00000296292&4685&10	ENST00000378230&5896&11	ENST00000578975&1210&10	ENST00000476266&385&10	ENST00000367619&3936&10	ENST00000526731&2167&11	ENST00000393389&3003&11	ENST00000499879&4619&11	ENST00000372806&4836&11	ENST00000453904&1920&11	ENST00000311630&5018&10	ENST00000492535&1937&11
77	GATCACAAGGTCAGGAGT	4	ENST00000374627	3271	hsa-miR-5096	ENST00000374627	3232	ENST00000600590&609&10	ENST00000597894&476&10	ENST00000443839&1601&11	ENST00000580536&1652&11	ENST00000429591&2393&11	ENST00000489512&1652&11	ENST00000392373&1694&10	ENST00000261653&1640&10	ENST00000361138&5506&11	ENST00000300107&3283&10	ENST00000569540&2098&11	ENST00000357613&2066&11	ENST00000422340&273&10	ENST00000550899&426&10	ENST00000547787&268&10	ENST00000368761&3788&11	ENST00000560637&2283&10	ENST00000261517&11988&10	ENST00000249837&11884&10	ENST00000597553&1488&11	ENST00000517385&565&11	ENST00000436793&34&10	ENST00000382892&34&10	ENST00000382891&34&10	ENST00000353275&34&10	ENST00000553632&290&11	ENST00000587077&836&10	ENST00000296292&4685&10	ENST00000378230&5896&11	ENST00000578975&1210&10	ENST00000476266&385&10	ENST00000367619&3936&10	ENST00000526731&2167&11	ENST00000393389&3003&11	ENST00000499879&4619&11	ENST00000372806&4836&11	ENST00000453904&1920&11	ENST00000311630&5018&10	ENST00000492535&1937&11
78	GGAGGATCGCTTGAGCCCAGG	3	ENST00000491239	2015	hsa-miR-5585-3p	ENST00000491239	1903	ENST00000444210&918&11	ENST00000569832&2324&12	ENST00000489697&645&11	ENST00000219235&2433&11	ENST00000371980&1286&11	ENST00000555998&99&16	ENST00000577595&164&11	ENST00000479515&686&11
79	GAGGCTGAGGCAGGAGAA	6	ENST00000562760	1006	hsa-miR-5096	ENST00000562760	1084	ENST00000565050&823&15	ENST00000568776&621&15	ENST00000601343&682&15	ENST00000523733&272&13	ENST00000597357&112&23	ENST00000458178&2620&23	ENST00000514784&329&11
79	GAGGCTGAGGCAGGAGAA	6	ENST00000421870	281	hsa-miR-5095	ENST00000421870	437	ENST00000565050&823&15	ENST00000568776&621&15	ENST00000601343&682&15	ENST00000523733&272&13	ENST00000597357&112&23	ENST00000458178&2620&23	ENST00000514784&329&11
79	GAGGCTGAGGCAGGAGAA	6	ENST00000501818	2423	hsa-miR-5095	ENST00000501818	2581	ENST00000565050&823&15	ENST00000568776&621&15	ENST00000601343&682&15	ENST00000523733&272&13	ENST00000597357&112&23	ENST00000458178&2620&23	ENST00000514784&329&11
79	GAGGCTGAGGCAGGAGAA	6	ENST00000563747	1334	hsa-miR-5095	ENST00000563747	1491	ENST00000565050&823&15	ENST00000568776&621&15	ENST00000601343&682&15	ENST00000523733&272&13	ENST00000597357&112&23	ENST00000458178&2620&23	ENST00000514784&329&11
79	GAGGCTGAGGCAGGAGAA	6	ENST00000586798	3069	hsa-miR-5095	ENST00000586798	3226	ENST00000565050&823&15	ENST00000568776&621&15	ENST00000601343&682&15	ENST00000523733&272&13	ENST00000597357&112&23	ENST00000458178&2620&23	ENST00000514784&329&11
79	GAGGCTGAGGCAGGAGAA	6	ENST00000441363	1955	hsa-miR-5095	ENST00000441363	2112	ENST00000565050&823&15	ENST00000568776&621&15	ENST00000601343&682&15	ENST00000523733&272&13	ENST00000597357&112&23	ENST00000458178&2620&23	ENST00000514784&329&11
79	GAGGCTGAGGCAGGAGAA	6	ENST00000332468	1146	hsa-miR-5095	ENST00000332468	1302	ENST00000565050&823&15	ENST00000568776&621&15	ENST00000601343&682&15	ENST00000523733&272&13	ENST00000597357&112&23	ENST00000458178&2620&23	ENST00000514784&329&11
79	GAGGCTGAGGCAGGAGAA	6	ENST00000506037	277	hsa-miR-5095	ENST00000506037	434	ENST00000565050&823&15	ENST00000568776&621&15	ENST00000601343&682&15	ENST00000523733&272&13	ENST00000597357&112&23	ENST00000458178&2620&23	ENST00000514784&329&11
79	GAGGCTGAGGCAGGAGAA	6	ENST00000436580	2708	hsa-miR-5095	ENST00000436580	2867	ENST00000565050&823&15	ENST00000568776&621&15	ENST00000601343&682&15	ENST00000523733&272&13	ENST00000597357&112&23	ENST00000458178&2620&23	ENST00000514784&329&11
79	GAGGCTGAGGCAGGAGAA	6	ENST00000355407	1634	hsa-miR-5095	ENST00000355407	1791	ENST00000565050&823&15	ENST00000568776&621&15	ENST00000601343&682&15	ENST00000523733&272&13	ENST00000597357&112&23	ENST00000458178&2620&23	ENST00000514784&329&11
79	GAGGCTGAGGCAGGAGAA	6	ENST00000547118	206	hsa-miR-5095	ENST00000547118	368	ENST00000565050&823&15	ENST00000568776&621&15	ENST00000601343&682&15	ENST00000523733&272&13	ENST00000597357&112&23	ENST00000458178&2620&23	ENST00000514784&329&11
79	GAGGCTGAGGCAGGAGAA	6	ENST00000510256	656	hsa-miR-5585-3p	ENST00000510256	665	ENST00000565050&823&15	ENST00000568776&621&15	ENST00000601343&682&15	ENST00000523733&272&13	ENST00000597357&112&23	ENST00000458178&2620&23	ENST00000514784&329&11
79	GAGGCTGAGGCAGGAGAA	6	ENST00000489074	656	hsa-miR-5585-3p	ENST00000489074	665	ENST00000565050&823&15	ENST00000568776&621&15	ENST00000601343&682&15	ENST00000523733&272&13	ENST00000597357&112&23	ENST00000458178&2620&23	ENST00000514784&329&11
79	GAGGCTGAGGCAGGAGAA	6	ENST00000576928	2428	hsa-miR-5095	ENST00000576928	2586	ENST00000565050&823&15	ENST00000568776&621&15	ENST00000601343&682&15	ENST00000523733&272&13	ENST00000597357&112&23	ENST00000458178&2620&23	ENST00000514784&329&11
79	GAGGCTGAGGCAGGAGAA	6	ENST00000574314	2345	hsa-miR-5095	ENST00000574314	2503	ENST00000565050&823&15	ENST00000568776&621&15	ENST00000601343&682&15	ENST00000523733&272&13	ENST00000597357&112&23	ENST00000458178&2620&23	ENST00000514784&329&11
79	GAGGCTGAGGCAGGAGAA	6	ENST00000573669	1460	hsa-miR-5095	ENST00000573669	1618	ENST00000565050&823&15	ENST00000568776&621&15	ENST00000601343&682&15	ENST00000523733&272&13	ENST00000597357&112&23	ENST00000458178&2620&23	ENST00000514784&329&11
79	GAGGCTGAGGCAGGAGAA	6	ENST00000548445	44	hsa-miR-5095	ENST00000548445	201	ENST00000565050&823&15	ENST00000568776&621&15	ENST00000601343&682&15	ENST00000523733&272&13	ENST00000597357&112&23	ENST00000458178&2620&23	ENST00000514784&329&11
79	GAGGCTGAGGCAGGAGAA	6	ENST00000369981	7984	hsa-miR-5095	ENST00000369981	8141	ENST00000565050&823&15	ENST00000568776&621&15	ENST00000601343&682&15	ENST00000523733&272&13	ENST00000597357&112&23	ENST00000458178&2620&23	ENST00000514784&329&11
79	GAGGCTGAGGCAGGAGAA	6	ENST00000471603	2225	hsa-miR-5095	ENST00000471603	2384	ENST00000565050&823&15	ENST00000568776&621&15	ENST00000601343&682&15	ENST00000523733&272&13	ENST00000597357&112&23	ENST00000458178&2620&23	ENST00000514784&329&11
79	GAGGCTGAGGCAGGAGAA	6	ENST00000574773	2509	hsa-miR-5095	ENST00000574773	2667	ENST00000565050&823&15	ENST00000568776&621&15	ENST00000601343&682&15	ENST00000523733&272&13	ENST00000597357&112&23	ENST00000458178&2620&23	ENST00000514784&329&11
79	GAGGCTGAGGCAGGAGAA	6	ENST00000575379	820	hsa-miR-5095	ENST00000575379	977	ENST00000565050&823&15	ENST00000568776&621&15	ENST00000601343&682&15	ENST00000523733&272&13	ENST00000597357&112&23	ENST00000458178&2620&23	ENST00000514784&329&11
79	GAGGCTGAGGCAGGAGAA	6	ENST00000576360	1576	hsa-miR-5095	ENST00000576360	1733	ENST00000565050&823&15	ENST00000568776&621&15	ENST00000601343&682&15	ENST00000523733&272&13	ENST00000597357&112&23	ENST00000458178&2620&23	ENST00000514784&329&11
79	GAGGCTGAGGCAGGAGAA	6	ENST00000306071	1904	hsa-miR-5095	ENST00000306071	2061	ENST00000565050&823&15	ENST00000568776&621&15	ENST00000601343&682&15	ENST00000523733&272&13	ENST00000597357&112&23	ENST00000458178&2620&23	ENST00000514784&329&11
79	GAGGCTGAGGCAGGAGAA	6	ENST00000470730	1990	hsa-miR-5095	ENST00000470730	2147	ENST00000565050&823&15	ENST00000568776&621&15	ENST00000601343&682&15	ENST00000523733&272&13	ENST00000597357&112&23	ENST00000458178&2620&23	ENST00000514784&329&11
79	GAGGCTGAGGCAGGAGAA	6	ENST00000568911	4762	hsa-miR-5096	ENST00000568911	4840	ENST00000565050&823&15	ENST00000568776&621&15	ENST00000601343&682&15	ENST00000523733&272&13	ENST00000597357&112&23	ENST00000458178&2620&23	ENST00000514784&329&11
79	GAGGCTGAGGCAGGAGAA	6	ENST00000558411	1935	hsa-miR-5096	ENST00000558411	2016	ENST00000565050&823&15	ENST00000568776&621&15	ENST00000601343&682&15	ENST00000523733&272&13	ENST00000597357&112&23	ENST00000458178&2620&23	ENST00000514784&329&11
79	GAGGCTGAGGCAGGAGAA	6	ENST00000473592	1606	hsa-miR-5096	ENST00000473592	1685	ENST00000565050&823&15	ENST00000568776&621&15	ENST00000601343&682&15	ENST00000523733&272&13	ENST00000597357&112&23	ENST00000458178&2620&23	ENST00000514784&329&11
79	GAGGCTGAGGCAGGAGAA	6	ENST00000343526	6933	hsa-miR-5096	ENST00000343526	7011	ENST00000565050&823&15	ENST00000568776&621&15	ENST00000601343&682&15	ENST00000523733&272&13	ENST00000597357&112&23	ENST00000458178&2620&23	ENST00000514784&329&11
79	GAGGCTGAGGCAGGAGAA	6	ENST00000510711	1229	hsa-miR-5096	ENST00000510711	1317	ENST00000565050&823&15	ENST00000568776&621&15	ENST00000601343&682&15	ENST00000523733&272&13	ENST00000597357&112&23	ENST00000458178&2620&23	ENST00000514784&329&11
79	GAGGCTGAGGCAGGAGAA	6	ENST00000409982	830	hsa-miR-5096	ENST00000409982	908	ENST00000565050&823&15	ENST00000568776&621&15	ENST00000601343&682&15	ENST00000523733&272&13	ENST00000597357&112&23	ENST00000458178&2620&23	ENST00000514784&329&11
79	GAGGCTGAGGCAGGAGAA	6	ENST00000378845	1389	hsa-miR-5096	ENST00000378845	1466	ENST00000565050&823&15	ENST00000568776&621&15	ENST00000601343&682&15	ENST00000523733&272&13	ENST00000597357&112&23	ENST00000458178&2620&23	ENST00000514784&329&11
79	GAGGCTGAGGCAGGAGAA	6	ENST00000370791	5077	hsa-miR-5096	ENST00000370791	5155	ENST00000565050&823&15	ENST00000568776&621&15	ENST00000601343&682&15	ENST00000523733&272&13	ENST00000597357&112&23	ENST00000458178&2620&23	ENST00000514784&329&11
79	GAGGCTGAGGCAGGAGAA	6	ENST00000370799	1539	hsa-miR-5096	ENST00000370799	1616	ENST00000565050&823&15	ENST00000568776&621&15	ENST00000601343&682&15	ENST00000523733&272&13	ENST00000597357&112&23	ENST00000458178&2620&23	ENST00000514784&329&11
79	GAGGCTGAGGCAGGAGAA	6	ENST00000484535	1141	hsa-miR-5096	ENST00000484535	1221	ENST00000565050&823&15	ENST00000568776&621&15	ENST00000601343&682&15	ENST00000523733&272&13	ENST00000597357&112&23	ENST00000458178&2620&23	ENST00000514784&329&11
79	GAGGCTGAGGCAGGAGAA	6	ENST00000590227	422	hsa-miR-5096	ENST00000590227	487	ENST00000565050&823&15	ENST00000568776&621&15	ENST00000601343&682&15	ENST00000523733&272&13	ENST00000597357&112&23	ENST00000458178&2620&23	ENST00000514784&329&11
79	GAGGCTGAGGCAGGAGAA	6	ENST00000554660	866	hsa-miR-5096	ENST00000554660	944	ENST00000565050&823&15	ENST00000568776&621&15	ENST00000601343&682&15	ENST00000523733&272&13	ENST00000597357&112&23	ENST00000458178&2620&23	ENST00000514784&329&11
79	GAGGCTGAGGCAGGAGAA	6	ENST00000311089	2111	hsa-miR-5096	ENST00000311089	2189	ENST00000565050&823&15	ENST00000568776&621&15	ENST00000601343&682&15	ENST00000523733&272&13	ENST00000597357&112&23	ENST00000458178&2620&23	ENST00000514784&329&11
79	GAGGCTGAGGCAGGAGAA	6	ENST00000563793	203	hsa-miR-5096	ENST00000563793	284	ENST00000565050&823&15	ENST00000568776&621&15	ENST00000601343&682&15	ENST00000523733&272&13	ENST00000597357&112&23	ENST00000458178&2620&23	ENST00000514784&329&11
79	GAGGCTGAGGCAGGAGAA	6	ENST00000296318	8096	hsa-miR-5096	ENST00000296318	8173	ENST00000565050&823&15	ENST00000568776&621&15	ENST00000601343&682&15	ENST00000523733&272&13	ENST00000597357&112&23	ENST00000458178&2620&23	ENST00000514784&329&11
79	GAGGCTGAGGCAGGAGAA	6	ENST00000600410	2247	hsa-miR-5096	ENST00000600410	2324	ENST00000565050&823&15	ENST00000568776&621&15	ENST00000601343&682&15	ENST00000523733&272&13	ENST00000597357&112&23	ENST00000458178&2620&23	ENST00000514784&329&11
79	GAGGCTGAGGCAGGAGAA	6	ENST00000563945	298	hsa-miR-5096	ENST00000563945	375	ENST00000565050&823&15	ENST00000568776&621&15	ENST00000601343&682&15	ENST00000523733&272&13	ENST00000597357&112&23	ENST00000458178&2620&23	ENST00000514784&329&11
79	GAGGCTGAGGCAGGAGAA	6	ENST00000318348	1249	hsa-miR-5096	ENST00000318348	1328	ENST00000565050&823&15	ENST00000568776&621&15	ENST00000601343&682&15	ENST00000523733&272&13	ENST00000597357&112&23	ENST00000458178&2620&23	ENST00000514784&329&11
79	GAGGCTGAGGCAGGAGAA	6	ENST00000576086	799	hsa-miR-5585-3p	ENST00000576086	808	ENST00000565050&823&15	ENST00000568776&621&15	ENST00000601343&682&15	ENST00000523733&272&13	ENST00000597357&112&23	ENST00000458178&2620&23	ENST00000514784&329&11
79	GAGGCTGAGGCAGGAGAA	6	ENST00000423644	4475	hsa-miR-5585-3p	ENST00000423644	4484	ENST00000565050&823&15	ENST00000568776&621&15	ENST00000601343&682&15	ENST00000523733&272&13	ENST00000597357&112&23	ENST00000458178&2620&23	ENST00000514784&329&11
79	GAGGCTGAGGCAGGAGAA	6	ENST00000359484	4348	hsa-miR-5585-3p	ENST00000359484	4357	ENST00000565050&823&15	ENST00000568776&621&15	ENST00000601343&682&15	ENST00000523733&272&13	ENST00000597357&112&23	ENST00000458178&2620&23	ENST00000514784&329&11
79	GAGGCTGAGGCAGGAGAA	6	ENST00000346834	4411	hsa-miR-5585-3p	ENST00000346834	4420	ENST00000565050&823&15	ENST00000568776&621&15	ENST00000601343&682&15	ENST00000523733&272&13	ENST00000597357&112&23	ENST00000458178&2620&23	ENST00000514784&329&11
79	GAGGCTGAGGCAGGAGAA	6	ENST00000480696	437	hsa-miR-5585-3p	ENST00000480696	446	ENST00000565050&823&15	ENST00000568776&621&15	ENST00000601343&682&15	ENST00000523733&272&13	ENST00000597357&112&23	ENST00000458178&2620&23	ENST00000514784&329&11
79	GAGGCTGAGGCAGGAGAA	6	ENST00000394019	4654	hsa-miR-5585-3p	ENST00000394019	4663	ENST00000565050&823&15	ENST00000568776&621&15	ENST00000601343&682&15	ENST00000523733&272&13	ENST00000597357&112&23	ENST00000458178&2620&23	ENST00000514784&329&11
79	GAGGCTGAGGCAGGAGAA	6	ENST00000483195	4882	hsa-miR-5585-3p	ENST00000483195	4891	ENST00000565050&823&15	ENST00000568776&621&15	ENST00000601343&682&15	ENST00000523733&272&13	ENST00000597357&112&23	ENST00000458178&2620&23	ENST00000514784&329&11
79	GAGGCTGAGGCAGGAGAA	6	ENST00000528973	3137	hsa-miR-5585-3p	ENST00000528973	2941	ENST00000565050&823&15	ENST00000568776&621&15	ENST00000601343&682&15	ENST00000523733&272&13	ENST00000597357&112&23	ENST00000458178&2620&23	ENST00000514784&329&11
79	GAGGCTGAGGCAGGAGAA	6	ENST00000597411	656	hsa-miR-5585-3p	ENST00000597411	665	ENST00000565050&823&15	ENST00000568776&621&15	ENST00000601343&682&15	ENST00000523733&272&13	ENST00000597357&112&23	ENST00000458178&2620&23	ENST00000514784&329&11
79	GAGGCTGAGGCAGGAGAA	6	ENST00000430014	1948	hsa-miR-5585-3p	ENST00000430014	1957	ENST00000565050&823&15	ENST00000568776&621&15	ENST00000601343&682&15	ENST00000523733&272&13	ENST00000597357&112&23	ENST00000458178&2620&23	ENST00000514784&329&11
79	GAGGCTGAGGCAGGAGAA	6	ENST00000580480	1429	hsa-miR-5585-3p	ENST00000580480	1438	ENST00000565050&823&15	ENST00000568776&621&15	ENST00000601343&682&15	ENST00000523733&272&13	ENST00000597357&112&23	ENST00000458178&2620&23	ENST00000514784&329&11
79	GAGGCTGAGGCAGGAGAA	6	ENST00000455004	1391	hsa-miR-5585-3p	ENST00000455004	1400	ENST00000565050&823&15	ENST00000568776&621&15	ENST00000601343&682&15	ENST00000523733&272&13	ENST00000597357&112&23	ENST00000458178&2620&23	ENST00000514784&329&11
79	GAGGCTGAGGCAGGAGAA	6	ENST00000440084	1970	hsa-miR-5585-3p	ENST00000440084	1979	ENST00000565050&823&15	ENST00000568776&621&15	ENST00000601343&682&15	ENST00000523733&272&13	ENST00000597357&112&23	ENST00000458178&2620&23	ENST00000514784&329&11
79	GAGGCTGAGGCAGGAGAA	6	ENST00000430442	1429	hsa-miR-5585-3p	ENST00000430442	1438	ENST00000565050&823&15	ENST00000568776&621&15	ENST00000601343&682&15	ENST00000523733&272&13	ENST00000597357&112&23	ENST00000458178&2620&23	ENST00000514784&329&11
79	GAGGCTGAGGCAGGAGAA	6	ENST00000465069	250	hsa-miR-5585-3p	ENST00000465069	259	ENST00000565050&823&15	ENST00000568776&621&15	ENST00000601343&682&15	ENST00000523733&272&13	ENST00000597357&112&23	ENST00000458178&2620&23	ENST00000514784&329&11
79	GAGGCTGAGGCAGGAGAA	6	ENST00000340681	393	hsa-miR-5585-3p	ENST00000340681	402	ENST00000565050&823&15	ENST00000568776&621&15	ENST00000601343&682&15	ENST00000523733&272&13	ENST00000597357&112&23	ENST00000458178&2620&23	ENST00000514784&329&11
79	GAGGCTGAGGCAGGAGAA	6	ENST00000504855	210	hsa-miR-5585-3p	ENST00000504855	219	ENST00000565050&823&15	ENST00000568776&621&15	ENST00000601343&682&15	ENST00000523733&272&13	ENST00000597357&112&23	ENST00000458178&2620&23	ENST00000514784&329&11
79	GAGGCTGAGGCAGGAGAA	6	ENST00000567244	111	hsa-miR-5585-3p	ENST00000567244	120	ENST00000565050&823&15	ENST00000568776&621&15	ENST00000601343&682&15	ENST00000523733&272&13	ENST00000597357&112&23	ENST00000458178&2620&23	ENST00000514784&329&11
79	GAGGCTGAGGCAGGAGAA	6	ENST00000380172	2536	hsa-miR-5585-3p	ENST00000380172	2545	ENST00000565050&823&15	ENST00000568776&621&15	ENST00000601343&682&15	ENST00000523733&272&13	ENST00000597357&112&23	ENST00000458178&2620&23	ENST00000514784&329&11
79	GAGGCTGAGGCAGGAGAA	6	ENST00000396307	2878	hsa-miR-5585-3p	ENST00000396307	2887	ENST00000565050&823&15	ENST00000568776&621&15	ENST00000601343&682&15	ENST00000523733&272&13	ENST00000597357&112&23	ENST00000458178&2620&23	ENST00000514784&329&11
79	GAGGCTGAGGCAGGAGAA	6	ENST00000527614	3118	hsa-miR-5585-3p	ENST00000527614	3127	ENST00000565050&823&15	ENST00000568776&621&15	ENST00000601343&682&15	ENST00000523733&272&13	ENST00000597357&112&23	ENST00000458178&2620&23	ENST00000514784&329&11
79	GAGGCTGAGGCAGGAGAA	6	ENST00000337963	2781	hsa-miR-5585-3p	ENST00000337963	2790	ENST00000565050&823&15	ENST00000568776&621&15	ENST00000601343&682&15	ENST00000523733&272&13	ENST00000597357&112&23	ENST00000458178&2620&23	ENST00000514784&329&11
79	GAGGCTGAGGCAGGAGAA	6	ENST00000502168	2486	hsa-miR-5585-3p	ENST00000502168	2495	ENST00000565050&823&15	ENST00000568776&621&15	ENST00000601343&682&15	ENST00000523733&272&13	ENST00000597357&112&23	ENST00000458178&2620&23	ENST00000514784&329&11
79	GAGGCTGAGGCAGGAGAA	6	ENST00000535942	2711	hsa-miR-5585-3p	ENST00000535942	2720	ENST00000565050&823&15	ENST00000568776&621&15	ENST00000601343&682&15	ENST00000523733&272&13	ENST00000597357&112&23	ENST00000458178&2620&23	ENST00000514784&329&11
79	GAGGCTGAGGCAGGAGAA	6	ENST00000382909	2372	hsa-miR-5585-3p	ENST00000382909	2381	ENST00000565050&823&15	ENST00000568776&621&15	ENST00000601343&682&15	ENST00000523733&272&13	ENST00000597357&112&23	ENST00000458178&2620&23	ENST00000514784&329&11
79	GAGGCTGAGGCAGGAGAA	6	ENST00000454337	4869	hsa-miR-5585-3p	ENST00000454337	4878	ENST00000565050&823&15	ENST00000568776&621&15	ENST00000601343&682&15	ENST00000523733&272&13	ENST00000597357&112&23	ENST00000458178&2620&23	ENST00000514784&329&11
79	GAGGCTGAGGCAGGAGAA	6	ENST00000590933	463	hsa-miR-5585-3p	ENST00000590933	472	ENST00000565050&823&15	ENST00000568776&621&15	ENST00000601343&682&15	ENST00000523733&272&13	ENST00000597357&112&23	ENST00000458178&2620&23	ENST00000514784&329&11
79	GAGGCTGAGGCAGGAGAA	6	ENST00000358661	2505	hsa-miR-5585-3p	ENST00000358661	2514	ENST00000565050&823&15	ENST00000568776&621&15	ENST00000601343&682&15	ENST00000523733&272&13	ENST00000597357&112&23	ENST00000458178&2620&23	ENST00000514784&329&11
79	GAGGCTGAGGCAGGAGAA	6	ENST00000354278	3231	hsa-miR-5585-3p	ENST00000354278	3240	ENST00000565050&823&15	ENST00000568776&621&15	ENST00000601343&682&15	ENST00000523733&272&13	ENST00000597357&112&23	ENST00000458178&2620&23	ENST00000514784&329&11
79	GAGGCTGAGGCAGGAGAA	6	ENST00000351894	3402	hsa-miR-5585-3p	ENST00000351894	3411	ENST00000565050&823&15	ENST00000568776&621&15	ENST00000601343&682&15	ENST00000523733&272&13	ENST00000597357&112&23	ENST00000458178&2620&23	ENST00000514784&329&11
79	GAGGCTGAGGCAGGAGAA	6	ENST00000535162	3567	hsa-miR-5585-3p	ENST00000535162	3576	ENST00000565050&823&15	ENST00000568776&621&15	ENST00000601343&682&15	ENST00000523733&272&13	ENST00000597357&112&23	ENST00000458178&2620&23	ENST00000514784&329&11
79	GAGGCTGAGGCAGGAGAA	6	ENST00000324134	3687	hsa-miR-5585-3p	ENST00000324134	3696	ENST00000565050&823&15	ENST00000568776&621&15	ENST00000601343&682&15	ENST00000523733&272&13	ENST00000597357&112&23	ENST00000458178&2620&23	ENST00000514784&329&11
79	GAGGCTGAGGCAGGAGAA	6	ENST00000283285	3850	hsa-miR-5585-3p	ENST00000283285	3859	ENST00000565050&823&15	ENST00000568776&621&15	ENST00000601343&682&15	ENST00000523733&272&13	ENST00000597357&112&23	ENST00000458178&2620&23	ENST00000514784&329&11
79	GAGGCTGAGGCAGGAGAA	6	ENST00000352690	3841	hsa-miR-5585-3p	ENST00000352690	3850	ENST00000565050&823&15	ENST00000568776&621&15	ENST00000601343&682&15	ENST00000523733&272&13	ENST00000597357&112&23	ENST00000458178&2620&23	ENST00000514784&329&11
79	GAGGCTGAGGCAGGAGAA	6	ENST00000586372	2923	hsa-miR-5585-3p	ENST00000586372	2932	ENST00000565050&823&15	ENST00000568776&621&15	ENST00000601343&682&15	ENST00000523733&272&13	ENST00000597357&112&23	ENST00000458178&2620&23	ENST00000514784&329&11
79	GAGGCTGAGGCAGGAGAA	6	ENST00000586372	3494	hsa-miR-5585-3p	ENST00000586372	3503	ENST00000565050&823&15	ENST00000568776&621&15	ENST00000601343&682&15	ENST00000523733&272&13	ENST00000597357&112&23	ENST00000458178&2620&23	ENST00000514784&329&11
80	GACGGGGTTTCTCCATGTTG	2	ENST00000488801	313	hsa-miR-1273e	ENST00000488801	402	ENST00000451142&683&27	ENST00000567275&241&10	ENST00000491289&4218&10	ENST00000274242&7063&27	ENST00000366112&750&10	ENST00000366093&490&17	ENST00000574613&490&17	ENST00000455607&699&17
80	GACGGGGTTTCTCCATGTTG	2	ENST00000464609	31	hsa-miR-1273g-3p	ENST00000464609	164	ENST00000451142&683&27	ENST00000567275&241&10	ENST00000491289&4218&10	ENST00000274242&7063&27	ENST00000366112&750&10	ENST00000366093&490&17	ENST00000574613&490&17	ENST00000455607&699&17
81	GTCACCCAGGCTGGAGTG	12	ENST00000590071	4399	hsa-miR-1273c	ENST00000590071	4101	ENST00000554532&343&16	ENST00000496593&2190&16
81	GTCACCCAGGCTGGAGTG	12	ENST00000481579	1847	hsa-miR-1273d	ENST00000481579	1793	ENST00000554532&343&16	ENST00000496593&2190&16
81	GTCACCCAGGCTGGAGTG	12	ENST00000553547	231	hsa-miR-1273d	ENST00000553547	177	ENST00000554532&343&16	ENST00000496593&2190&16
81	GTCACCCAGGCTGGAGTG	12	ENST00000568928	958	hsa-miR-1273e	ENST00000568928	898	ENST00000554532&343&16	ENST00000496593&2190&16
81	GTCACCCAGGCTGGAGTG	12	ENST00000556243	245	hsa-miR-1273e	ENST00000556243	168	ENST00000554532&343&16	ENST00000496593&2190&16
81	GTCACCCAGGCTGGAGTG	12	ENST00000455424	653	hsa-miR-1273g-3p	ENST00000455424	637	ENST00000554532&343&16	ENST00000496593&2190&16
81	GTCACCCAGGCTGGAGTG	12	ENST00000586025	2354	hsa-miR-1273g-3p	ENST00000586025	1859	ENST00000554532&343&16	ENST00000496593&2190&16
81	GTCACCCAGGCTGGAGTG	12	ENST00000525088	1075	hsa-miR-1273g-3p	ENST00000525088	1059	ENST00000554532&343&16	ENST00000496593&2190&16
81	GTCACCCAGGCTGGAGTG	12	ENST00000600299	572	hsa-miR-1273g-3p	ENST00000600299	556	ENST00000554532&343&16	ENST00000496593&2190&16
81	GTCACCCAGGCTGGAGTG	12	ENST00000573007	297	hsa-miR-1273g-3p	ENST00000573007	281	ENST00000554532&343&16	ENST00000496593&2190&16
82	GAGTAGCTGGGACTACAGGTGCCCA	2	ENST00000492534	703	hsa-miR-1273g-3p	ENST00000492534	776	ENST00000561159&723&12
83	CAGGAGGCTGAGGCAGGAG	3	ENST00000421870	281	hsa-miR-5095	ENST00000421870	434	ENST00000565050&823&15	ENST00000568776&621&15	ENST00000565600&219&13	ENST00000458178&2623&11
83	CAGGAGGCTGAGGCAGGAG	3	ENST00000501818	2423	hsa-miR-5095	ENST00000501818	2578	ENST00000565050&823&15	ENST00000568776&621&15	ENST00000565600&219&13	ENST00000458178&2623&11
83	CAGGAGGCTGAGGCAGGAG	3	ENST00000441363	1955	hsa-miR-5095	ENST00000441363	2109	ENST00000565050&823&15	ENST00000568776&621&15	ENST00000565600&219&13	ENST00000458178&2623&11
83	CAGGAGGCTGAGGCAGGAG	3	ENST00000332468	1146	hsa-miR-5095	ENST00000332468	1299	ENST00000565050&823&15	ENST00000568776&621&15	ENST00000565600&219&13	ENST00000458178&2623&11
83	CAGGAGGCTGAGGCAGGAG	3	ENST00000547118	206	hsa-miR-5095	ENST00000547118	365	ENST00000565050&823&15	ENST00000568776&621&15	ENST00000565600&219&13	ENST00000458178&2623&11
83	CAGGAGGCTGAGGCAGGAG	3	ENST00000598033	110	hsa-miR-5095	ENST00000598033	266	ENST00000565050&823&15	ENST00000568776&621&15	ENST00000565600&219&13	ENST00000458178&2623&11
83	CAGGAGGCTGAGGCAGGAG	3	ENST00000599759	159	hsa-miR-5095	ENST00000599759	315	ENST00000565050&823&15	ENST00000568776&621&15	ENST00000565600&219&13	ENST00000458178&2623&11
83	CAGGAGGCTGAGGCAGGAG	3	ENST00000568911	4762	hsa-miR-5096	ENST00000568911	4837	ENST00000565050&823&15	ENST00000568776&621&15	ENST00000565600&219&13	ENST00000458178&2623&11
83	CAGGAGGCTGAGGCAGGAG	3	ENST00000510711	1229	hsa-miR-5096	ENST00000510711	1314	ENST00000565050&823&15	ENST00000568776&621&15	ENST00000565600&219&13	ENST00000458178&2623&11
83	CAGGAGGCTGAGGCAGGAG	3	ENST00000318348	1249	hsa-miR-5096	ENST00000318348	1325	ENST00000565050&823&15	ENST00000568776&621&15	ENST00000565600&219&13	ENST00000458178&2623&11
83	CAGGAGGCTGAGGCAGGAG	3	ENST00000497341	3334	hsa-miR-5585-3p	ENST00000497341	3340	ENST00000565050&823&15	ENST00000568776&621&15	ENST00000565600&219&13	ENST00000458178&2623&11
83	CAGGAGGCTGAGGCAGGAG	3	ENST00000576086	799	hsa-miR-5585-3p	ENST00000576086	805	ENST00000565050&823&15	ENST00000568776&621&15	ENST00000565600&219&13	ENST00000458178&2623&11
83	CAGGAGGCTGAGGCAGGAG	3	ENST00000597411	656	hsa-miR-5585-3p	ENST00000597411	662	ENST00000565050&823&15	ENST00000568776&621&15	ENST00000565600&219&13	ENST00000458178&2623&11
83	CAGGAGGCTGAGGCAGGAG	3	ENST00000430014	1948	hsa-miR-5585-3p	ENST00000430014	1954	ENST00000565050&823&15	ENST00000568776&621&15	ENST00000565600&219&13	ENST00000458178&2623&11
83	CAGGAGGCTGAGGCAGGAG	3	ENST00000580480	1429	hsa-miR-5585-3p	ENST00000580480	1435	ENST00000565050&823&15	ENST00000568776&621&15	ENST00000565600&219&13	ENST00000458178&2623&11
83	CAGGAGGCTGAGGCAGGAG	3	ENST00000455004	1391	hsa-miR-5585-3p	ENST00000455004	1397	ENST00000565050&823&15	ENST00000568776&621&15	ENST00000565600&219&13	ENST00000458178&2623&11
83	CAGGAGGCTGAGGCAGGAG	3	ENST00000440084	1970	hsa-miR-5585-3p	ENST00000440084	1976	ENST00000565050&823&15	ENST00000568776&621&15	ENST00000565600&219&13	ENST00000458178&2623&11
83	CAGGAGGCTGAGGCAGGAG	3	ENST00000430442	1429	hsa-miR-5585-3p	ENST00000430442	1435	ENST00000565050&823&15	ENST00000568776&621&15	ENST00000565600&219&13	ENST00000458178&2623&11
83	CAGGAGGCTGAGGCAGGAG	3	ENST00000465069	250	hsa-miR-5585-3p	ENST00000465069	256	ENST00000565050&823&15	ENST00000568776&621&15	ENST00000565600&219&13	ENST00000458178&2623&11
83	CAGGAGGCTGAGGCAGGAG	3	ENST00000340681	393	hsa-miR-5585-3p	ENST00000340681	399	ENST00000565050&823&15	ENST00000568776&621&15	ENST00000565600&219&13	ENST00000458178&2623&11
83	CAGGAGGCTGAGGCAGGAG	3	ENST00000504855	210	hsa-miR-5585-3p	ENST00000504855	216	ENST00000565050&823&15	ENST00000568776&621&15	ENST00000565600&219&13	ENST00000458178&2623&11
83	CAGGAGGCTGAGGCAGGAG	3	ENST00000567244	111	hsa-miR-5585-3p	ENST00000567244	117	ENST00000565050&823&15	ENST00000568776&621&15	ENST00000565600&219&13	ENST00000458178&2623&11
83	CAGGAGGCTGAGGCAGGAG	3	ENST00000380172	2536	hsa-miR-5585-3p	ENST00000380172	2542	ENST00000565050&823&15	ENST00000568776&621&15	ENST00000565600&219&13	ENST00000458178&2623&11
83	CAGGAGGCTGAGGCAGGAG	3	ENST00000396307	2878	hsa-miR-5585-3p	ENST00000396307	2884	ENST00000565050&823&15	ENST00000568776&621&15	ENST00000565600&219&13	ENST00000458178&2623&11
83	CAGGAGGCTGAGGCAGGAG	3	ENST00000527614	3118	hsa-miR-5585-3p	ENST00000527614	3124	ENST00000565050&823&15	ENST00000568776&621&15	ENST00000565600&219&13	ENST00000458178&2623&11
83	CAGGAGGCTGAGGCAGGAG	3	ENST00000337963	2781	hsa-miR-5585-3p	ENST00000337963	2787	ENST00000565050&823&15	ENST00000568776&621&15	ENST00000565600&219&13	ENST00000458178&2623&11
83	CAGGAGGCTGAGGCAGGAG	3	ENST00000502168	2486	hsa-miR-5585-3p	ENST00000502168	2492	ENST00000565050&823&15	ENST00000568776&621&15	ENST00000565600&219&13	ENST00000458178&2623&11
83	CAGGAGGCTGAGGCAGGAG	3	ENST00000535942	2711	hsa-miR-5585-3p	ENST00000535942	2717	ENST00000565050&823&15	ENST00000568776&621&15	ENST00000565600&219&13	ENST00000458178&2623&11
83	CAGGAGGCTGAGGCAGGAG	3	ENST00000382909	2372	hsa-miR-5585-3p	ENST00000382909	2378	ENST00000565050&823&15	ENST00000568776&621&15	ENST00000565600&219&13	ENST00000458178&2623&11
83	CAGGAGGCTGAGGCAGGAG	3	ENST00000454337	4869	hsa-miR-5585-3p	ENST00000454337	4875	ENST00000565050&823&15	ENST00000568776&621&15	ENST00000565600&219&13	ENST00000458178&2623&11
83	CAGGAGGCTGAGGCAGGAG	3	ENST00000590933	463	hsa-miR-5585-3p	ENST00000590933	469	ENST00000565050&823&15	ENST00000568776&621&15	ENST00000565600&219&13	ENST00000458178&2623&11
83	CAGGAGGCTGAGGCAGGAG	3	ENST00000358661	2505	hsa-miR-5585-3p	ENST00000358661	2511	ENST00000565050&823&15	ENST00000568776&621&15	ENST00000565600&219&13	ENST00000458178&2623&11
83	CAGGAGGCTGAGGCAGGAG	3	ENST00000354278	3231	hsa-miR-5585-3p	ENST00000354278	3237	ENST00000565050&823&15	ENST00000568776&621&15	ENST00000565600&219&13	ENST00000458178&2623&11
83	CAGGAGGCTGAGGCAGGAG	3	ENST00000351894	3402	hsa-miR-5585-3p	ENST00000351894	3408	ENST00000565050&823&15	ENST00000568776&621&15	ENST00000565600&219&13	ENST00000458178&2623&11
83	CAGGAGGCTGAGGCAGGAG	3	ENST00000535162	3567	hsa-miR-5585-3p	ENST00000535162	3573	ENST00000565050&823&15	ENST00000568776&621&15	ENST00000565600&219&13	ENST00000458178&2623&11
83	CAGGAGGCTGAGGCAGGAG	3	ENST00000324134	3687	hsa-miR-5585-3p	ENST00000324134	3693	ENST00000565050&823&15	ENST00000568776&621&15	ENST00000565600&219&13	ENST00000458178&2623&11
83	CAGGAGGCTGAGGCAGGAG	3	ENST00000283285	3850	hsa-miR-5585-3p	ENST00000283285	3856	ENST00000565050&823&15	ENST00000568776&621&15	ENST00000565600&219&13	ENST00000458178&2623&11
83	CAGGAGGCTGAGGCAGGAG	3	ENST00000352690	3841	hsa-miR-5585-3p	ENST00000352690	3847	ENST00000565050&823&15	ENST00000568776&621&15	ENST00000565600&219&13	ENST00000458178&2623&11
83	CAGGAGGCTGAGGCAGGAG	3	ENST00000586372	2923	hsa-miR-5585-3p	ENST00000586372	2929	ENST00000565050&823&15	ENST00000568776&621&15	ENST00000565600&219&13	ENST00000458178&2623&11
84	TGGGAGGCTGAGGCAGGAGAATT	2	ENST00000574773	2509	hsa-miR-5095	ENST00000574773	2664	ENST00000550899&445&20	ENST00000388768&3436&20	ENST00000466187&2045&20
85	ACAATCTCGGCTCACTGCAACCTC	3	ENST00000329468	4698	hsa-miR-1273e	ENST00000329468	4663	ENST00000505153&5608&10	ENST00000418747&2388&10	ENST00000556386&1831&11	ENST00000563747&1560&13	ENST00000502451&3340&10	ENST00000582986&4951&10	ENST00000381271&4332&10	ENST00000492956&2278&11	ENST00000492956&1961&11	ENST00000541208&4365&10	ENST00000526794&6671&13	ENST00000443972&3202&13	ENST00000568298&1802&13	ENST00000526980&598&11	ENST00000547020&4710&10	ENST00000247178&2859&10	ENST00000558189&2806&10	ENST00000336111&2378&10	ENST00000566157&2639&10	ENST00000481883&1126&10	ENST00000521080&3736&10	ENST00000453355&2049&11	ENST00000592502&1701&10	ENST00000529978&523&11	ENST00000282026&1685&11	ENST00000361485&1071&11	ENST00000361485&600&13	ENST00000478047&2532&11	ENST00000536716&1544&11	ENST00000327473&1513&11	ENST00000330115&1220&10	ENST00000469222&4477&13	ENST00000405413&2990&11	ENST00000311412&2953&11	ENST00000312423&1644&11	ENST00000528353&1181&10	ENST00000320672&4885&11	ENST00000295121&1456&11	ENST00000568031&849&13	ENST00000566190&279&11	ENST00000548900&547&10	ENST00000548626&112&10
86	GGGATTACAGGCATGAGCCACCA	2	ENST00000455424	653	hsa-miR-1273g-3p	ENST00000455424	867	ENST00000334731&856&1731	ENST00000479413&784&1731	ENST00000380641&1955&10	ENST00000558194&3746&10	ENST00000304734&1318&10	ENST00000493763&2054&10
87	TGGCACGATCTCGGCTCACT	2	ENST00000275053	6737	hsa-miR-1273a	ENST00000275053	6760	ENST00000565600&902&11	ENST00000440018&218&13	ENST00000502505&2850&11	ENST00000526794&6673&11	ENST00000512095&3063&15	ENST00000601440&5132&11	ENST00000309033&5776&11
87	TGGCACGATCTCGGCTCACT	2	ENST00000518639	956	hsa-miR-1273g-3p	ENST00000518639	961	ENST00000565600&902&11	ENST00000440018&218&13	ENST00000502505&2850&11	ENST00000526794&6673&11	ENST00000512095&3063&15	ENST00000601440&5132&11	ENST00000309033&5776&11
88	TGCCCAGGCTGGAGTGCGGT	2	ENST00000462616	2438	hsa-miR-1273g-3p	ENST00000462616	2613	ENST00000454877&547&16	ENST00000409982&1001&16
89	CAGGCTGGAGTGCAGTGGCGCA	3	ENST00000359815	30	hsa-miR-1273a	ENST00000359815	38	ENST00000505594&1254&16
89	CAGGCTGGAGTGCAGTGGCGCA	3	ENST00000588024	124	hsa-miR-1273a	ENST00000588024	132	ENST00000505594&1254&16
89	CAGGCTGGAGTGCAGTGGCGCA	3	ENST00000548157	215	hsa-miR-1972	ENST00000548157	306	ENST00000505594&1254&16
89	CAGGCTGGAGTGCAGTGGCGCA	3	ENST00000547850	215	hsa-miR-1972	ENST00000547850	306	ENST00000505594&1254&16
89	CAGGCTGGAGTGCAGTGGCGCA	3	ENST00000527806	1530	hsa-miR-1273e	ENST00000527806	1476	ENST00000505594&1254&16
89	CAGGCTGGAGTGCAGTGGCGCA	3	ENST00000281031	2115	hsa-miR-1273e	ENST00000281031	2061	ENST00000505594&1254&16
89	CAGGCTGGAGTGCAGTGGCGCA	3	ENST00000523129	2063	hsa-miR-1273g-3p	ENST00000523129	2053	ENST00000505594&1254&16
89	CAGGCTGGAGTGCAGTGGCGCA	3	ENST00000416209	2064	hsa-miR-1273g-3p	ENST00000416209	2054	ENST00000505594&1254&16
89	CAGGCTGGAGTGCAGTGGCGCA	3	ENST00000595753	4232	hsa-miR-1273g-3p	ENST00000595753	4222	ENST00000505594&1254&16
89	CAGGCTGGAGTGCAGTGGCGCA	3	ENST00000399576	238	hsa-miR-1273g-3p	ENST00000399576	228	ENST00000505594&1254&16
90	ACTTTGGGAGGCTGAGGCAGGCG	2	ENST00000563747	1334	hsa-miR-5095	ENST00000563747	1350	ENST00000508631&499&11	ENST00000369291&2010&11	ENST00000556287&237&11	ENST00000366211&243&11	ENST00000548181&1031&11	ENST00000574928&3094&11	ENST00000493726&504&11	ENST00000366249&73&11	ENST00000273145&2769&11	ENST00000422265&2814&11	ENST00000442925&2737&11	ENST00000495523&343&11	ENST00000475133&4484&11	ENST00000375847&4254&11	ENST00000380587&1578&11	ENST00000519096&1752&11	ENST00000380586&1964&11	ENST00000434271&2603&11	ENST00000353047&2619&11	ENST00000357949&1808&11	ENST00000449592&5725&11	ENST00000572485&2554&11	ENST00000317370&2561&11
90	ACTTTGGGAGGCTGAGGCAGGCG	2	ENST00000547118	206	hsa-miR-5095	ENST00000547118	222	ENST00000508631&499&11	ENST00000369291&2010&11	ENST00000556287&237&11	ENST00000366211&243&11	ENST00000548181&1031&11	ENST00000574928&3094&11	ENST00000493726&504&11	ENST00000366249&73&11	ENST00000273145&2769&11	ENST00000422265&2814&11	ENST00000442925&2737&11	ENST00000495523&343&11	ENST00000475133&4484&11	ENST00000375847&4254&11	ENST00000380587&1578&11	ENST00000519096&1752&11	ENST00000380586&1964&11	ENST00000434271&2603&11	ENST00000353047&2619&11	ENST00000357949&1808&11	ENST00000449592&5725&11	ENST00000572485&2554&11	ENST00000317370&2561&11
90	ACTTTGGGAGGCTGAGGCAGGCG	2	ENST00000558411	1935	hsa-miR-5096	ENST00000558411	1873	ENST00000508631&499&11	ENST00000369291&2010&11	ENST00000556287&237&11	ENST00000366211&243&11	ENST00000548181&1031&11	ENST00000574928&3094&11	ENST00000493726&504&11	ENST00000366249&73&11	ENST00000273145&2769&11	ENST00000422265&2814&11	ENST00000442925&2737&11	ENST00000495523&343&11	ENST00000475133&4484&11	ENST00000375847&4254&11	ENST00000380587&1578&11	ENST00000519096&1752&11	ENST00000380586&1964&11	ENST00000434271&2603&11	ENST00000353047&2619&11	ENST00000357949&1808&11	ENST00000449592&5725&11	ENST00000572485&2554&11	ENST00000317370&2561&11
91	ATTTTTAGTAGAGATGGGGTTTCA	3	ENST00000521861	1718	hsa-miR-1285-3p	ENST00000521861	1855	ENST00000600661&1246&23
91	ATTTTTAGTAGAGATGGGGTTTCA	3	ENST00000471144	460	hsa-miR-1273a	ENST00000471144	600	ENST00000600661&1246&23
91	ATTTTTAGTAGAGATGGGGTTTCA	3	ENST00000484427	1963	hsa-miR-1273a	ENST00000484427	2103	ENST00000600661&1246&23
91	ATTTTTAGTAGAGATGGGGTTTCA	3	ENST00000590071	4399	hsa-miR-1273c	ENST00000590071	4238	ENST00000600661&1246&23
91	ATTTTTAGTAGAGATGGGGTTTCA	3	ENST00000231498	7287	hsa-miR-1273e	ENST00000231498	7372	ENST00000600661&1246&23
91	ATTTTTAGTAGAGATGGGGTTTCA	3	ENST00000537526	3601	hsa-miR-1273e	ENST00000537526	3679	ENST00000600661&1246&23
91	ATTTTTAGTAGAGATGGGGTTTCA	3	ENST00000261497	3841	hsa-miR-1273e	ENST00000261497	3919	ENST00000600661&1246&23
91	ATTTTTAGTAGAGATGGGGTTTCA	3	ENST00000455424	653	hsa-miR-1273g-3p	ENST00000455424	775	ENST00000600661&1246&23
91	ATTTTTAGTAGAGATGGGGTTTCA	3	ENST00000586025	2354	hsa-miR-1273g-3p	ENST00000586025	2477	ENST00000600661&1246&23
91	ATTTTTAGTAGAGATGGGGTTTCA	3	ENST00000480612	266	hsa-miR-1273f	ENST00000480612	353	ENST00000600661&1246&23
91	ATTTTTAGTAGAGATGGGGTTTCA	3	ENST00000465342	3042	hsa-miR-1273g-3p	ENST00000465342	3164	ENST00000600661&1246&23
91	ATTTTTAGTAGAGATGGGGTTTCA	3	ENST00000462616	2438	hsa-miR-1273g-3p	ENST00000462616	2750	ENST00000600661&1246&23
91	ATTTTTAGTAGAGATGGGGTTTCA	3	ENST00000505031	1227	hsa-miR-1273g-3p	ENST00000505031	1349	ENST00000600661&1246&23
91	ATTTTTAGTAGAGATGGGGTTTCA	3	ENST00000600850	868	hsa-miR-1273g-3p	ENST00000600850	987	ENST00000600661&1246&23
92	CGGGAGGCTGAGGCAGGAGA	3	ENST00000562760	1006	hsa-miR-5096	ENST00000562760	1081	ENST00000601343&685&20
92	CGGGAGGCTGAGGCAGGAGA	3	ENST00000563747	1334	hsa-miR-5095	ENST00000563747	1488	ENST00000601343&685&20
92	CGGGAGGCTGAGGCAGGAGA	3	ENST00000586798	3069	hsa-miR-5095	ENST00000586798	3223	ENST00000601343&685&20
92	CGGGAGGCTGAGGCAGGAGA	3	ENST00000506037	277	hsa-miR-5095	ENST00000506037	431	ENST00000601343&685&20
92	CGGGAGGCTGAGGCAGGAGA	3	ENST00000436580	2708	hsa-miR-5095	ENST00000436580	2864	ENST00000601343&685&20
92	CGGGAGGCTGAGGCAGGAGA	3	ENST00000510256	656	hsa-miR-5585-3p	ENST00000510256	662	ENST00000601343&685&20
92	CGGGAGGCTGAGGCAGGAGA	3	ENST00000489074	656	hsa-miR-5585-3p	ENST00000489074	662	ENST00000601343&685&20
92	CGGGAGGCTGAGGCAGGAGA	3	ENST00000576928	2428	hsa-miR-5095	ENST00000576928	2583	ENST00000601343&685&20
92	CGGGAGGCTGAGGCAGGAGA	3	ENST00000574314	2345	hsa-miR-5095	ENST00000574314	2500	ENST00000601343&685&20
92	CGGGAGGCTGAGGCAGGAGA	3	ENST00000573669	1460	hsa-miR-5095	ENST00000573669	1615	ENST00000601343&685&20
92	CGGGAGGCTGAGGCAGGAGA	3	ENST00000548445	44	hsa-miR-5095	ENST00000548445	198	ENST00000601343&685&20
92	CGGGAGGCTGAGGCAGGAGA	3	ENST00000470730	1990	hsa-miR-5095	ENST00000470730	2144	ENST00000601343&685&20
92	CGGGAGGCTGAGGCAGGAGA	3	ENST00000558411	1935	hsa-miR-5096	ENST00000558411	2013	ENST00000601343&685&20
92	CGGGAGGCTGAGGCAGGAGA	3	ENST00000343526	6933	hsa-miR-5096	ENST00000343526	7008	ENST00000601343&685&20
92	CGGGAGGCTGAGGCAGGAGA	3	ENST00000370799	1539	hsa-miR-5096	ENST00000370799	1613	ENST00000601343&685&20
92	CGGGAGGCTGAGGCAGGAGA	3	ENST00000484535	1141	hsa-miR-5096	ENST00000484535	1218	ENST00000601343&685&20
92	CGGGAGGCTGAGGCAGGAGA	3	ENST00000554660	866	hsa-miR-5096	ENST00000554660	941	ENST00000601343&685&20
92	CGGGAGGCTGAGGCAGGAGA	3	ENST00000311089	2111	hsa-miR-5096	ENST00000311089	2186	ENST00000601343&685&20
92	CGGGAGGCTGAGGCAGGAGA	3	ENST00000563793	203	hsa-miR-5096	ENST00000563793	281	ENST00000601343&685&20
92	CGGGAGGCTGAGGCAGGAGA	3	ENST00000600410	2247	hsa-miR-5096	ENST00000600410	2321	ENST00000601343&685&20
92	CGGGAGGCTGAGGCAGGAGA	3	ENST00000563945	298	hsa-miR-5096	ENST00000563945	372	ENST00000601343&685&20
92	CGGGAGGCTGAGGCAGGAGA	3	ENST00000423644	4475	hsa-miR-5585-3p	ENST00000423644	4481	ENST00000601343&685&20
92	CGGGAGGCTGAGGCAGGAGA	3	ENST00000359484	4348	hsa-miR-5585-3p	ENST00000359484	4354	ENST00000601343&685&20
92	CGGGAGGCTGAGGCAGGAGA	3	ENST00000346834	4411	hsa-miR-5585-3p	ENST00000346834	4417	ENST00000601343&685&20
92	CGGGAGGCTGAGGCAGGAGA	3	ENST00000480696	437	hsa-miR-5585-3p	ENST00000480696	443	ENST00000601343&685&20
92	CGGGAGGCTGAGGCAGGAGA	3	ENST00000394019	4654	hsa-miR-5585-3p	ENST00000394019	4660	ENST00000601343&685&20
92	CGGGAGGCTGAGGCAGGAGA	3	ENST00000483195	4882	hsa-miR-5585-3p	ENST00000483195	4888	ENST00000601343&685&20
92	CGGGAGGCTGAGGCAGGAGA	3	ENST00000528973	3137	hsa-miR-5585-3p	ENST00000528973	2938	ENST00000601343&685&20
93	TCACTTGAGCCCAGGAGG	2	ENST00000485067	749	hsa-miR-5585-3p	ENST00000485067	776	ENST00000533592&2151&14	ENST00000485767&4370&14	ENST00000569612&73&14	ENST00000586278&686&14
94	ACTCAGGAGGCTGAGGCAG	2	ENST00000421870	281	hsa-miR-5095	ENST00000421870	431	ENST00000458178&2623&11
94	ACTCAGGAGGCTGAGGCAG	2	ENST00000501818	2423	hsa-miR-5095	ENST00000501818	2575	ENST00000458178&2623&11
94	ACTCAGGAGGCTGAGGCAG	2	ENST00000441363	1955	hsa-miR-5095	ENST00000441363	2106	ENST00000458178&2623&11
94	ACTCAGGAGGCTGAGGCAG	2	ENST00000332468	1146	hsa-miR-5095	ENST00000332468	1296	ENST00000458178&2623&11
94	ACTCAGGAGGCTGAGGCAG	2	ENST00000547118	206	hsa-miR-5095	ENST00000547118	362	ENST00000458178&2623&11
94	ACTCAGGAGGCTGAGGCAG	2	ENST00000598033	110	hsa-miR-5095	ENST00000598033	263	ENST00000458178&2623&11
94	ACTCAGGAGGCTGAGGCAG	2	ENST00000599759	159	hsa-miR-5095	ENST00000599759	312	ENST00000458178&2623&11
94	ACTCAGGAGGCTGAGGCAG	2	ENST00000229022	3559	hsa-miR-5095	ENST00000229022	3725	ENST00000458178&2623&11
94	ACTCAGGAGGCTGAGGCAG	2	ENST00000395324	3546	hsa-miR-5095	ENST00000395324	3712	ENST00000458178&2623&11
94	ACTCAGGAGGCTGAGGCAG	2	ENST00000568911	4762	hsa-miR-5096	ENST00000568911	4834	ENST00000458178&2623&11
94	ACTCAGGAGGCTGAGGCAG	2	ENST00000260276	1200	hsa-miR-5096	ENST00000260276	1272	ENST00000458178&2623&11
94	ACTCAGGAGGCTGAGGCAG	2	ENST00000510711	1229	hsa-miR-5096	ENST00000510711	1311	ENST00000458178&2623&11
94	ACTCAGGAGGCTGAGGCAG	2	ENST00000318348	1249	hsa-miR-5096	ENST00000318348	1322	ENST00000458178&2623&11
94	ACTCAGGAGGCTGAGGCAG	2	ENST00000539680	3689	hsa-miR-5585-3p	ENST00000539680	3692	ENST00000458178&2623&11
94	ACTCAGGAGGCTGAGGCAG	2	ENST00000597411	656	hsa-miR-5585-3p	ENST00000597411	659	ENST00000458178&2623&11
94	ACTCAGGAGGCTGAGGCAG	2	ENST00000430014	1948	hsa-miR-5585-3p	ENST00000430014	1951	ENST00000458178&2623&11
94	ACTCAGGAGGCTGAGGCAG	2	ENST00000580480	1429	hsa-miR-5585-3p	ENST00000580480	1432	ENST00000458178&2623&11
94	ACTCAGGAGGCTGAGGCAG	2	ENST00000455004	1391	hsa-miR-5585-3p	ENST00000455004	1394	ENST00000458178&2623&11
94	ACTCAGGAGGCTGAGGCAG	2	ENST00000440084	1970	hsa-miR-5585-3p	ENST00000440084	1973	ENST00000458178&2623&11
94	ACTCAGGAGGCTGAGGCAG	2	ENST00000430442	1429	hsa-miR-5585-3p	ENST00000430442	1432	ENST00000458178&2623&11
94	ACTCAGGAGGCTGAGGCAG	2	ENST00000465069	250	hsa-miR-5585-3p	ENST00000465069	253	ENST00000458178&2623&11
94	ACTCAGGAGGCTGAGGCAG	2	ENST00000340681	393	hsa-miR-5585-3p	ENST00000340681	396	ENST00000458178&2623&11
94	ACTCAGGAGGCTGAGGCAG	2	ENST00000567244	111	hsa-miR-5585-3p	ENST00000567244	114	ENST00000458178&2623&11
94	ACTCAGGAGGCTGAGGCAG	2	ENST00000380172	2536	hsa-miR-5585-3p	ENST00000380172	2539	ENST00000458178&2623&11
94	ACTCAGGAGGCTGAGGCAG	2	ENST00000396307	2878	hsa-miR-5585-3p	ENST00000396307	2881	ENST00000458178&2623&11
94	ACTCAGGAGGCTGAGGCAG	2	ENST00000527614	3118	hsa-miR-5585-3p	ENST00000527614	3121	ENST00000458178&2623&11
94	ACTCAGGAGGCTGAGGCAG	2	ENST00000337963	2781	hsa-miR-5585-3p	ENST00000337963	2784	ENST00000458178&2623&11
94	ACTCAGGAGGCTGAGGCAG	2	ENST00000502168	2486	hsa-miR-5585-3p	ENST00000502168	2489	ENST00000458178&2623&11
94	ACTCAGGAGGCTGAGGCAG	2	ENST00000535942	2711	hsa-miR-5585-3p	ENST00000535942	2714	ENST00000458178&2623&11
94	ACTCAGGAGGCTGAGGCAG	2	ENST00000382909	2372	hsa-miR-5585-3p	ENST00000382909	2375	ENST00000458178&2623&11
94	ACTCAGGAGGCTGAGGCAG	2	ENST00000454337	4869	hsa-miR-5585-3p	ENST00000454337	4872	ENST00000458178&2623&11
94	ACTCAGGAGGCTGAGGCAG	2	ENST00000358661	2505	hsa-miR-5585-3p	ENST00000358661	2508	ENST00000458178&2623&11
94	ACTCAGGAGGCTGAGGCAG	2	ENST00000354278	3231	hsa-miR-5585-3p	ENST00000354278	3234	ENST00000458178&2623&11
94	ACTCAGGAGGCTGAGGCAG	2	ENST00000351894	3402	hsa-miR-5585-3p	ENST00000351894	3405	ENST00000458178&2623&11
94	ACTCAGGAGGCTGAGGCAG	2	ENST00000535162	3567	hsa-miR-5585-3p	ENST00000535162	3570	ENST00000458178&2623&11
94	ACTCAGGAGGCTGAGGCAG	2	ENST00000324134	3687	hsa-miR-5585-3p	ENST00000324134	3690	ENST00000458178&2623&11
94	ACTCAGGAGGCTGAGGCAG	2	ENST00000283285	3850	hsa-miR-5585-3p	ENST00000283285	3853	ENST00000458178&2623&11
94	ACTCAGGAGGCTGAGGCAG	2	ENST00000352690	3841	hsa-miR-5585-3p	ENST00000352690	3844	ENST00000458178&2623&11
94	ACTCAGGAGGCTGAGGCAG	2	ENST00000586372	2923	hsa-miR-5585-3p	ENST00000586372	2926	ENST00000458178&2623&11
95	AGCTCACTGCAACCTCTGCCTC	5	ENST00000559920	1086	hsa-miR-1273g-3p	ENST00000559920	1103	ENST00000563704&1399&35	ENST00000558838&2517&69	ENST00000581788&1123&69	ENST00000458361&3929&35	ENST00000500093&1019&11	ENST00000455945&3929&35	ENST00000453209&3925&35	ENST00000415153&3929&35	ENST00000414662&3926&35	ENST00000437716&3925&35	ENST00000314927&1539&35	ENST00000570415&39&35	ENST00000479959&2178&69	ENST00000354286&1527&69	ENST00000319863&1911&69	ENST00000471389&4685&69	ENST00000568530&7159&35	ENST00000288050&7954&35	ENST00000482662&142&11	ENST00000482404&4333&11	ENST00000498286&4021&69	ENST00000498286&4474&69	ENST00000375990&7069&69	ENST00000259253&6785&69	ENST00000530529&3197&35	ENST00000434945&3367&35	ENST00000323468&3298&35	ENST00000567181&2006&35	ENST00000315392&2908&69	ENST00000270458&5225&11	ENST00000413565&130&11	ENST00000356387&3611&69	ENST00000356387&2620&11	ENST00000356387&5104&11	ENST00000356387&4029&69	ENST00000397149&5989&69	ENST00000326279&3407&35	ENST00000374278&3053&35
96	GTGCTGGGATTACAGGCATGAGCCA	3	ENST00000395530	5837	hsa-miR-1273a	ENST00000395530	5739	ENST00000575402&2679&17	ENST00000575402&966&17	ENST00000444558&3627&17	ENST00000560958&1534&17	ENST00000414432&3637&17	ENST00000481349&2450&17	ENST00000600854&1838&17
96	GTGCTGGGATTACAGGCATGAGCCA	3	ENST00000515103	627	hsa-miR-1273e	ENST00000515103	760	ENST00000575402&2679&17	ENST00000575402&966&17	ENST00000444558&3627&17	ENST00000560958&1534&17	ENST00000414432&3637&17	ENST00000481349&2450&17	ENST00000600854&1838&17
96	GTGCTGGGATTACAGGCATGAGCCA	3	ENST00000455424	653	hsa-miR-1273g-3p	ENST00000455424	862	ENST00000575402&2679&17	ENST00000575402&966&17	ENST00000444558&3627&17	ENST00000560958&1534&17	ENST00000414432&3637&17	ENST00000481349&2450&17	ENST00000600854&1838&17
97	TTTTGAGACGGAGTCTCG	2	ENST00000595501	248	hsa-miR-1273a	ENST00000595501	86	ENST00000375990&8440&23	ENST00000259253&8156&23	ENST00000305188&3902&23
97	TTTTGAGACGGAGTCTCG	2	ENST00000548157	215	hsa-miR-1972	ENST00000548157	280	ENST00000375990&8440&23	ENST00000259253&8156&23	ENST00000305188&3902&23
97	TTTTGAGACGGAGTCTCG	2	ENST00000547850	215	hsa-miR-1972	ENST00000547850	280	ENST00000375990&8440&23	ENST00000259253&8156&23	ENST00000305188&3902&23
97	TTTTGAGACGGAGTCTCG	2	ENST00000492534	703	hsa-miR-1273g-3p	ENST00000492534	665	ENST00000375990&8440&23	ENST00000259253&8156&23	ENST00000305188&3902&23
97	TTTTGAGACGGAGTCTCG	2	ENST00000562965	705	hsa-miR-1273g-3p	ENST00000562965	667	ENST00000375990&8440&23	ENST00000259253&8156&23	ENST00000305188&3902&23
98	CCCAGGCTGGAGTGCAGTGGC	2	ENST00000366391	45	hsa-miR-1285-3p	ENST00000366391	48	ENST00000505153&5631&16
98	CCCAGGCTGGAGTGCAGTGGC	2	ENST00000588534	75	hsa-miR-1285-3p	ENST00000588534	78	ENST00000505153&5631&16
98	CCCAGGCTGGAGTGCAGTGGC	2	ENST00000413543	3566	hsa-miR-1285-3p	ENST00000413543	3569	ENST00000505153&5631&16
98	CCCAGGCTGGAGTGCAGTGGC	2	ENST00000523879	264	hsa-miR-1285-3p	ENST00000523879	267	ENST00000505153&5631&16
98	CCCAGGCTGGAGTGCAGTGGC	2	ENST00000544423	527	hsa-miR-1285-3p	ENST00000544423	530	ENST00000505153&5631&16
98	CCCAGGCTGGAGTGCAGTGGC	2	ENST00000442850	84	hsa-miR-1285-3p	ENST00000442850	87	ENST00000505153&5631&16
98	CCCAGGCTGGAGTGCAGTGGC	2	ENST00000473778	1242	hsa-miR-1273a	ENST00000473778	1248	ENST00000505153&5631&16
98	CCCAGGCTGGAGTGCAGTGGC	2	ENST00000503602	1036	hsa-miR-1273a	ENST00000503602	1042	ENST00000505153&5631&16
98	CCCAGGCTGGAGTGCAGTGGC	2	ENST00000359815	30	hsa-miR-1273a	ENST00000359815	36	ENST00000505153&5631&16
98	CCCAGGCTGGAGTGCAGTGGC	2	ENST00000470464	2427	hsa-miR-1273a	ENST00000470464	2433	ENST00000505153&5631&16
98	CCCAGGCTGGAGTGCAGTGGC	2	ENST00000485585	2427	hsa-miR-1273a	ENST00000485585	2433	ENST00000505153&5631&16
98	CCCAGGCTGGAGTGCAGTGGC	2	ENST00000495194	2426	hsa-miR-1273a	ENST00000495194	2432	ENST00000505153&5631&16
98	CCCAGGCTGGAGTGCAGTGGC	2	ENST00000486105	2425	hsa-miR-1273a	ENST00000486105	2431	ENST00000505153&5631&16
98	CCCAGGCTGGAGTGCAGTGGC	2	ENST00000475993	2425	hsa-miR-1273a	ENST00000475993	2431	ENST00000505153&5631&16
98	CCCAGGCTGGAGTGCAGTGGC	2	ENST00000494413	2425	hsa-miR-1273a	ENST00000494413	2431	ENST00000505153&5631&16
98	CCCAGGCTGGAGTGCAGTGGC	2	ENST00000475528	2427	hsa-miR-1273a	ENST00000475528	2433	ENST00000505153&5631&16
98	CCCAGGCTGGAGTGCAGTGGC	2	ENST00000547793	34	hsa-miR-1273a	ENST00000547793	40	ENST00000505153&5631&16
98	CCCAGGCTGGAGTGCAGTGGC	2	ENST00000504241	1914	hsa-miR-1273a	ENST00000504241	1920	ENST00000505153&5631&16
98	CCCAGGCTGGAGTGCAGTGGC	2	ENST00000275053	6737	hsa-miR-1273a	ENST00000275053	6743	ENST00000505153&5631&16
98	CCCAGGCTGGAGTGCAGTGGC	2	ENST00000588024	124	hsa-miR-1273a	ENST00000588024	130	ENST00000505153&5631&16
98	CCCAGGCTGGAGTGCAGTGGC	2	ENST00000537394	444	hsa-miR-1273a	ENST00000537394	450	ENST00000505153&5631&16
98	CCCAGGCTGGAGTGCAGTGGC	2	ENST00000548157	215	hsa-miR-1972	ENST00000548157	304	ENST00000505153&5631&16
98	CCCAGGCTGGAGTGCAGTGGC	2	ENST00000547850	215	hsa-miR-1972	ENST00000547850	304	ENST00000505153&5631&16
98	CCCAGGCTGGAGTGCAGTGGC	2	ENST00000590071	4399	hsa-miR-1273c	ENST00000590071	4105	ENST00000505153&5631&16
98	CCCAGGCTGGAGTGCAGTGGC	2	ENST00000599628	1486	hsa-miR-1273e	ENST00000599628	979	ENST00000505153&5631&16
98	CCCAGGCTGGAGTGCAGTGGC	2	ENST00000556243	245	hsa-miR-1273e	ENST00000556243	172	ENST00000505153&5631&16
98	CCCAGGCTGGAGTGCAGTGGC	2	ENST00000566036	63	hsa-miR-1273f	ENST00000566036	20	ENST00000505153&5631&16
98	CCCAGGCTGGAGTGCAGTGGC	2	ENST00000586025	2354	hsa-miR-1273g-3p	ENST00000586025	1863	ENST00000505153&5631&16
98	CCCAGGCTGGAGTGCAGTGGC	2	ENST00000586025	2354	hsa-miR-1273g-3p	ENST00000586025	2342	ENST00000505153&5631&16
98	CCCAGGCTGGAGTGCAGTGGC	2	ENST00000357137	5385	hsa-miR-1273f	ENST00000357137	5342	ENST00000505153&5631&16
98	CCCAGGCTGGAGTGCAGTGGC	2	ENST00000432854	3529	hsa-miR-1273f	ENST00000432854	3486	ENST00000505153&5631&16
98	CCCAGGCTGGAGTGCAGTGGC	2	ENST00000523129	1746	hsa-miR-1273g-3p	ENST00000523129	1439	ENST00000505153&5631&16
98	CCCAGGCTGGAGTGCAGTGGC	2	ENST00000416209	1746	hsa-miR-1273g-3p	ENST00000416209	1439	ENST00000505153&5631&16
98	CCCAGGCTGGAGTGCAGTGGC	2	ENST00000600299	572	hsa-miR-1273g-3p	ENST00000600299	560	ENST00000505153&5631&16
99	ATTAGCCGGGTGTGGTGGC	2	ENST00000574773	2509	hsa-miR-5095	ENST00000574773	2622	ENST00000424587&995&17	ENST00000448958&723&17	ENST00000425566&1055&17	ENST00000435930&1878&16	ENST00000464589&390&29	ENST00000265044&3407&17	ENST00000461452&1907&29	ENST00000585876&171&29	ENST00000394670&6287&27	ENST00000592072&1148&17	ENST00000330374&3419&29	ENST00000415930&3828&27	ENST00000273480&1351&16	ENST00000354308&2749&16	ENST00000590851&2552&16	ENST00000588534&912&27	ENST00000590872&1634&16	ENST00000598219&269&17	ENST00000490797&42&27	ENST00000458235&4474&27
99	ATTAGCCGGGTGTGGTGGC	2	ENST00000378845	1389	hsa-miR-5096	ENST00000378845	1421	ENST00000424587&995&17	ENST00000448958&723&17	ENST00000425566&1055&17	ENST00000435930&1878&16	ENST00000464589&390&29	ENST00000265044&3407&17	ENST00000461452&1907&29	ENST00000585876&171&29	ENST00000394670&6287&27	ENST00000592072&1148&17	ENST00000330374&3419&29	ENST00000415930&3828&27	ENST00000273480&1351&16	ENST00000354308&2749&16	ENST00000590851&2552&16	ENST00000588534&912&27	ENST00000590872&1634&16	ENST00000598219&269&17	ENST00000490797&42&27	ENST00000458235&4474&27
99	ATTAGCCGGGTGTGGTGGC	2	ENST00000445593	284	hsa-miR-5096	ENST00000445593	318	ENST00000424587&995&17	ENST00000448958&723&17	ENST00000425566&1055&17	ENST00000435930&1878&16	ENST00000464589&390&29	ENST00000265044&3407&17	ENST00000461452&1907&29	ENST00000585876&171&29	ENST00000394670&6287&27	ENST00000592072&1148&17	ENST00000330374&3419&29	ENST00000415930&3828&27	ENST00000273480&1351&16	ENST00000354308&2749&16	ENST00000590851&2552&16	ENST00000588534&912&27	ENST00000590872&1634&16	ENST00000598219&269&17	ENST00000490797&42&27	ENST00000458235&4474&27
99	ATTAGCCGGGTGTGGTGGC	2	ENST00000480696	437	hsa-miR-5585-3p	ENST00000480696	401	ENST00000424587&995&17	ENST00000448958&723&17	ENST00000425566&1055&17	ENST00000435930&1878&16	ENST00000464589&390&29	ENST00000265044&3407&17	ENST00000461452&1907&29	ENST00000585876&171&29	ENST00000394670&6287&27	ENST00000592072&1148&17	ENST00000330374&3419&29	ENST00000415930&3828&27	ENST00000273480&1351&16	ENST00000354308&2749&16	ENST00000590851&2552&16	ENST00000588534&912&27	ENST00000590872&1634&16	ENST00000598219&269&17	ENST00000490797&42&27	ENST00000458235&4474&27
100	GGCGGAGGTTGCAGTGAGCCAAG	2	ENST00000595787	5312	hsa-miR-5095	ENST00000595787	5501	ENST00000394856&2422&11	ENST00000514353&2494&11
100	GGCGGAGGTTGCAGTGAGCCAAG	2	ENST00000340855	5312	hsa-miR-5095	ENST00000340855	5501	ENST00000394856&2422&11	ENST00000514353&2494&11
100	GGCGGAGGTTGCAGTGAGCCAAG	2	ENST00000568911	4762	hsa-miR-5096	ENST00000568911	4874	ENST00000394856&2422&11	ENST00000514353&2494&11
100	GGCGGAGGTTGCAGTGAGCCAAG	2	ENST00000563777	3249	hsa-miR-5585-3p	ENST00000563777	3292	ENST00000394856&2422&11	ENST00000514353&2494&11
101	CCCAGGCTGGAGTGCAGTGGTGCG	2	ENST00000600625	1956	hsa-miR-1273f	ENST00000600625	1913	ENST00000601013&1614&16
101	CCCAGGCTGGAGTGCAGTGGTGCG	2	ENST00000324894	2030	hsa-miR-1273f	ENST00000324894	1987	ENST00000601013&1614&16
101	CCCAGGCTGGAGTGCAGTGGTGCG	2	ENST00000562965	705	hsa-miR-1273g-3p	ENST00000562965	693	ENST00000601013&1614&16
102	CGCCCAGGCTGGAGTGCAGTGGCAT	2	ENST00000473778	1242	hsa-miR-1273a	ENST00000473778	1246	ENST00000506172&1508&16	ENST00000436928&313&16	ENST00000526353&3843&16	ENST00000527063&2009&16	ENST00000505153&5631&16	ENST00000550756&1649&16	ENST00000588555&1439&16	ENST00000463826&2073&16	ENST00000265715&4474&16	ENST00000378785&622&16
103	AAATTAGCCGGGCGTGGTGGCA	2	ENST00000338352	1271	hsa-miR-5095	ENST00000338352	1380	ENST00000504366&1208&29	ENST00000370978&3841&17	ENST00000452676&323&36	ENST00000599096&267&36	ENST00000514026&6470&36	ENST00000367996&3888&36	ENST00000469275&614&36	ENST00000449224&1482&13	ENST00000320954&1686&13	ENST00000597777&483&36	ENST00000594962&44&29	ENST00000534656&931&13	ENST00000574118&931&13	ENST00000450686&403&36	ENST00000512496&62&16	ENST00000596579&523&29	ENST00000493504&1431&29	ENST00000568371&574&36	ENST00000356560&124&147	ENST00000566574&616&13	ENST00000491741&818&29	ENST00000526724&1950&13	ENST00000588427&303&13	ENST00000275053&6880&27	ENST00000470332&552&10	ENST00000301981&2479&13	ENST00000596217&1147&13	ENST00000509152&616&36	ENST00000561088&469&13
103	AAATTAGCCGGGCGTGGTGGCA	2	ENST00000586372	2923	hsa-miR-5585-3p	ENST00000586372	2885	ENST00000504366&1208&29	ENST00000370978&3841&17	ENST00000452676&323&36	ENST00000599096&267&36	ENST00000514026&6470&36	ENST00000367996&3888&36	ENST00000469275&614&36	ENST00000449224&1482&13	ENST00000320954&1686&13	ENST00000597777&483&36	ENST00000594962&44&29	ENST00000534656&931&13	ENST00000574118&931&13	ENST00000450686&403&36	ENST00000512496&62&16	ENST00000596579&523&29	ENST00000493504&1431&29	ENST00000568371&574&36	ENST00000356560&124&147	ENST00000566574&616&13	ENST00000491741&818&29	ENST00000526724&1950&13	ENST00000588427&303&13	ENST00000275053&6880&27	ENST00000470332&552&10	ENST00000301981&2479&13	ENST00000596217&1147&13	ENST00000509152&616&36	ENST00000561088&469&13
104	GTGCTGGGATTACAGGCGTGAGC	3	ENST00000548157	215	hsa-miR-1972	ENST00000548157	184	ENST00000548900&479&17
104	GTGCTGGGATTACAGGCGTGAGC	3	ENST00000547850	215	hsa-miR-1972	ENST00000547850	184	ENST00000548900&479&17
104	GTGCTGGGATTACAGGCGTGAGC	3	ENST00000369301	8119	hsa-miR-1273e	ENST00000369301	7970	ENST00000548900&479&17
104	GTGCTGGGATTACAGGCGTGAGC	3	ENST00000566036	63	hsa-miR-1273f	ENST00000566036	246	ENST00000548900&479&17
104	GTGCTGGGATTACAGGCGTGAGC	3	ENST00000505907	3248	hsa-miR-1273f	ENST00000505907	3430	ENST00000548900&479&17
104	GTGCTGGGATTACAGGCGTGAGC	3	ENST00000523129	1746	hsa-miR-1273g-3p	ENST00000523129	1662	ENST00000548900&479&17
104	GTGCTGGGATTACAGGCGTGAGC	3	ENST00000416209	1746	hsa-miR-1273g-3p	ENST00000416209	1662	ENST00000548900&479&17
104	GTGCTGGGATTACAGGCGTGAGC	3	ENST00000600850	868	hsa-miR-1273g-3p	ENST00000600850	1075	ENST00000548900&479&17
104	GTGCTGGGATTACAGGCGTGAGC	3	ENST00000322753	2459	hsa-miR-5585-3p	ENST00000322753	2229	ENST00000548900&479&17
105	ACCATATTGGCCAGGCTG	3	ENST00000520176	190	hsa-miR-1273g-3p	ENST00000520176	335	ENST00000438190&714&12	ENST00000412349&1236&27	ENST00000433739&714&12	ENST00000414692&714&12	ENST00000448434&714&12	ENST00000426098&714&12	ENST00000423340&714&12	ENST00000458724&714&12	ENST00000442726&426&25	ENST00000456074&891&18	ENST00000455730&351&25	ENST00000340196&1323&25	ENST00000438709&5644&12	ENST00000258459&5665&12	ENST00000366091&618&25	ENST00000573787&5615&25	ENST00000470664&510&27	ENST00000574596&1403&27	ENST00000358004&1930&27	ENST00000334744&1966&27	ENST00000344001&2278&27	ENST00000399398&2560&27	ENST00000481620&1350&25	ENST00000492956&1827&25	ENST00000493354&4220&25	ENST00000479695&4220&25	ENST00000375990&6941&27	ENST00000259253&6657&27	ENST00000263066&4507&11	ENST00000352360&4188&11	ENST00000458213&4629&11	ENST00000429277&4974&11	ENST00000258767&6084&27	ENST00000399322&6084&27	ENST00000403951&6317&27	ENST00000399264&1322&25	ENST00000270458&6958&13	ENST00000523599&869&27	ENST00000472801&4220&25	ENST00000559095&370&25	ENST00000491963&1849&12	ENST00000482297&4220&25
106	CCAGGCTGGAGTGCAGTGGCA	4	ENST00000366391	45	hsa-miR-1285-3p	ENST00000366391	49	ENST00000505153&5631&16
106	CCAGGCTGGAGTGCAGTGGCA	4	ENST00000588534	75	hsa-miR-1285-3p	ENST00000588534	79	ENST00000505153&5631&16
106	CCAGGCTGGAGTGCAGTGGCA	4	ENST00000544423	527	hsa-miR-1285-3p	ENST00000544423	531	ENST00000505153&5631&16
106	CCAGGCTGGAGTGCAGTGGCA	4	ENST00000442850	84	hsa-miR-1285-3p	ENST00000442850	88	ENST00000505153&5631&16
106	CCAGGCTGGAGTGCAGTGGCA	4	ENST00000473778	1242	hsa-miR-1273a	ENST00000473778	1249	ENST00000505153&5631&16
106	CCAGGCTGGAGTGCAGTGGCA	4	ENST00000503602	1036	hsa-miR-1273a	ENST00000503602	1043	ENST00000505153&5631&16
106	CCAGGCTGGAGTGCAGTGGCA	4	ENST00000547793	34	hsa-miR-1273a	ENST00000547793	41	ENST00000505153&5631&16
106	CCAGGCTGGAGTGCAGTGGCA	4	ENST00000275053	6737	hsa-miR-1273a	ENST00000275053	6744	ENST00000505153&5631&16
106	CCAGGCTGGAGTGCAGTGGCA	4	ENST00000537394	444	hsa-miR-1273a	ENST00000537394	451	ENST00000505153&5631&16
106	CCAGGCTGGAGTGCAGTGGCA	4	ENST00000590071	4399	hsa-miR-1273c	ENST00000590071	4106	ENST00000505153&5631&16
106	CCAGGCTGGAGTGCAGTGGCA	4	ENST00000330266	3259	hsa-miR-1273e	ENST00000330266	3204	ENST00000505153&5631&16
106	CCAGGCTGGAGTGCAGTGGCA	4	ENST00000556243	245	hsa-miR-1273e	ENST00000556243	173	ENST00000505153&5631&16
106	CCAGGCTGGAGTGCAGTGGCA	4	ENST00000566036	63	hsa-miR-1273f	ENST00000566036	21	ENST00000505153&5631&16
106	CCAGGCTGGAGTGCAGTGGCA	4	ENST00000586025	2354	hsa-miR-1273g-3p	ENST00000586025	1864	ENST00000505153&5631&16
106	CCAGGCTGGAGTGCAGTGGCA	4	ENST00000586025	2354	hsa-miR-1273g-3p	ENST00000586025	2343	ENST00000505153&5631&16
106	CCAGGCTGGAGTGCAGTGGCA	4	ENST00000357137	5385	hsa-miR-1273f	ENST00000357137	5343	ENST00000505153&5631&16
106	CCAGGCTGGAGTGCAGTGGCA	4	ENST00000432854	3529	hsa-miR-1273f	ENST00000432854	3487	ENST00000505153&5631&16
106	CCAGGCTGGAGTGCAGTGGCA	4	ENST00000480612	266	hsa-miR-1273f	ENST00000480612	224	ENST00000505153&5631&16
106	CCAGGCTGGAGTGCAGTGGCA	4	ENST00000523129	1746	hsa-miR-1273g-3p	ENST00000523129	1440	ENST00000505153&5631&16
106	CCAGGCTGGAGTGCAGTGGCA	4	ENST00000416209	1746	hsa-miR-1273g-3p	ENST00000416209	1440	ENST00000505153&5631&16
106	CCAGGCTGGAGTGCAGTGGCA	4	ENST00000600299	572	hsa-miR-1273g-3p	ENST00000600299	561	ENST00000505153&5631&16
107	ACAGAGTGAGACTCCATCTCA	3	ENST00000562760	1006	hsa-miR-5096	ENST00000562760	1170	ENST00000575020&917&10	ENST00000575749&1087&10	ENST00000527404&638&13	ENST00000321560&1594&10	ENST00000527007&2146&12	ENST00000526439&180&10	ENST00000592072&1021&12	ENST00000426926&1161&12	ENST00000446045&1495&11	ENST00000375234&1635&11	ENST00000411939&1286&11	ENST00000366998&1521&10	ENST00000519132&1296&12	ENST00000480357&1989&12
107	ACAGAGTGAGACTCCATCTCA	3	ENST00000471863	2080	hsa-miR-5096	ENST00000471863	2243	ENST00000575020&917&10	ENST00000575749&1087&10	ENST00000527404&638&13	ENST00000321560&1594&10	ENST00000527007&2146&12	ENST00000526439&180&10	ENST00000592072&1021&12	ENST00000426926&1161&12	ENST00000446045&1495&11	ENST00000375234&1635&11	ENST00000411939&1286&11	ENST00000366998&1521&10	ENST00000519132&1296&12	ENST00000480357&1989&12
108	GAGGCTGAGGCGGGTGGA	2	ENST00000595787	5312	hsa-miR-5095	ENST00000595787	5335	ENST00000523129&1062&15	ENST00000416209&1062&15	ENST00000500031&878&15	ENST00000452466&94&23	ENST00000447832&808&13	ENST00000580094&1575&13	ENST00000585110&502&15	ENST00000418400&502&15	ENST00000449800&1575&13	ENST00000440803&502&15	ENST00000445221&1575&15	ENST00000515723&409&15	ENST00000595626&751&23	ENST00000598641&45&23	ENST00000601512&431&13	ENST00000578657&2334&15	ENST00000355232&2396&15	ENST00000514226&201&13	ENST00000556170&3743&13	ENST00000446633&1171&13	ENST00000448637&2614&13	ENST00000549874&644&263	ENST00000547738&1035&263	ENST00000533026&945&263	ENST00000566975&431&13	ENST00000488225&751&23	ENST00000014935&45&23	ENST00000462432&773&23	ENST00000443972&1974&23	ENST00000466825&281&13	ENST00000476417&2548&15	ENST00000591259&624&23	ENST00000591340&3436&23	ENST00000334116&3573&23	ENST00000594154&4141&23	ENST00000369308&2478&15	ENST00000263593&4598&15	ENST00000595464&2064&15	ENST00000302787&5097&23	ENST00000595825&368&15	ENST00000378251&2177&15	ENST00000554706&617&23
108	GAGGCTGAGGCGGGTGGA	2	ENST00000340855	5312	hsa-miR-5095	ENST00000340855	5335	ENST00000523129&1062&15	ENST00000416209&1062&15	ENST00000500031&878&15	ENST00000452466&94&23	ENST00000447832&808&13	ENST00000580094&1575&13	ENST00000585110&502&15	ENST00000418400&502&15	ENST00000449800&1575&13	ENST00000440803&502&15	ENST00000445221&1575&15	ENST00000515723&409&15	ENST00000595626&751&23	ENST00000598641&45&23	ENST00000601512&431&13	ENST00000578657&2334&15	ENST00000355232&2396&15	ENST00000514226&201&13	ENST00000556170&3743&13	ENST00000446633&1171&13	ENST00000448637&2614&13	ENST00000549874&644&263	ENST00000547738&1035&263	ENST00000533026&945&263	ENST00000566975&431&13	ENST00000488225&751&23	ENST00000014935&45&23	ENST00000462432&773&23	ENST00000443972&1974&23	ENST00000466825&281&13	ENST00000476417&2548&15	ENST00000591259&624&23	ENST00000591340&3436&23	ENST00000334116&3573&23	ENST00000594154&4141&23	ENST00000369308&2478&15	ENST00000263593&4598&15	ENST00000595464&2064&15	ENST00000302787&5097&23	ENST00000595825&368&15	ENST00000378251&2177&15	ENST00000554706&617&23
108	GAGGCTGAGGCGGGTGGA	2	ENST00000445593	284	hsa-miR-5096	ENST00000445593	227	ENST00000523129&1062&15	ENST00000416209&1062&15	ENST00000500031&878&15	ENST00000452466&94&23	ENST00000447832&808&13	ENST00000580094&1575&13	ENST00000585110&502&15	ENST00000418400&502&15	ENST00000449800&1575&13	ENST00000440803&502&15	ENST00000445221&1575&15	ENST00000515723&409&15	ENST00000595626&751&23	ENST00000598641&45&23	ENST00000601512&431&13	ENST00000578657&2334&15	ENST00000355232&2396&15	ENST00000514226&201&13	ENST00000556170&3743&13	ENST00000446633&1171&13	ENST00000448637&2614&13	ENST00000549874&644&263	ENST00000547738&1035&263	ENST00000533026&945&263	ENST00000566975&431&13	ENST00000488225&751&23	ENST00000014935&45&23	ENST00000462432&773&23	ENST00000443972&1974&23	ENST00000466825&281&13	ENST00000476417&2548&15	ENST00000591259&624&23	ENST00000591340&3436&23	ENST00000334116&3573&23	ENST00000594154&4141&23	ENST00000369308&2478&15	ENST00000263593&4598&15	ENST00000595464&2064&15	ENST00000302787&5097&23	ENST00000595825&368&15	ENST00000378251&2177&15	ENST00000554706&617&23
108	GAGGCTGAGGCGGGTGGA	2	ENST00000318348	1249	hsa-miR-5096	ENST00000318348	1192	ENST00000523129&1062&15	ENST00000416209&1062&15	ENST00000500031&878&15	ENST00000452466&94&23	ENST00000447832&808&13	ENST00000580094&1575&13	ENST00000585110&502&15	ENST00000418400&502&15	ENST00000449800&1575&13	ENST00000440803&502&15	ENST00000445221&1575&15	ENST00000515723&409&15	ENST00000595626&751&23	ENST00000598641&45&23	ENST00000601512&431&13	ENST00000578657&2334&15	ENST00000355232&2396&15	ENST00000514226&201&13	ENST00000556170&3743&13	ENST00000446633&1171&13	ENST00000448637&2614&13	ENST00000549874&644&263	ENST00000547738&1035&263	ENST00000533026&945&263	ENST00000566975&431&13	ENST00000488225&751&23	ENST00000014935&45&23	ENST00000462432&773&23	ENST00000443972&1974&23	ENST00000466825&281&13	ENST00000476417&2548&15	ENST00000591259&624&23	ENST00000591340&3436&23	ENST00000334116&3573&23	ENST00000594154&4141&23	ENST00000369308&2478&15	ENST00000263593&4598&15	ENST00000595464&2064&15	ENST00000302787&5097&23	ENST00000595825&368&15	ENST00000378251&2177&15	ENST00000554706&617&23
108	GAGGCTGAGGCGGGTGGA	2	ENST00000528973	3137	hsa-miR-5585-3p	ENST00000528973	2806	ENST00000523129&1062&15	ENST00000416209&1062&15	ENST00000500031&878&15	ENST00000452466&94&23	ENST00000447832&808&13	ENST00000580094&1575&13	ENST00000585110&502&15	ENST00000418400&502&15	ENST00000449800&1575&13	ENST00000440803&502&15	ENST00000445221&1575&15	ENST00000515723&409&15	ENST00000595626&751&23	ENST00000598641&45&23	ENST00000601512&431&13	ENST00000578657&2334&15	ENST00000355232&2396&15	ENST00000514226&201&13	ENST00000556170&3743&13	ENST00000446633&1171&13	ENST00000448637&2614&13	ENST00000549874&644&263	ENST00000547738&1035&263	ENST00000533026&945&263	ENST00000566975&431&13	ENST00000488225&751&23	ENST00000014935&45&23	ENST00000462432&773&23	ENST00000443972&1974&23	ENST00000466825&281&13	ENST00000476417&2548&15	ENST00000591259&624&23	ENST00000591340&3436&23	ENST00000334116&3573&23	ENST00000594154&4141&23	ENST00000369308&2478&15	ENST00000263593&4598&15	ENST00000595464&2064&15	ENST00000302787&5097&23	ENST00000595825&368&15	ENST00000378251&2177&15	ENST00000554706&617&23
109	CCCAGGCTGGAGTGCAGTGG	2	ENST00000366391	45	hsa-miR-1285-3p	ENST00000366391	48	ENST00000505153&5631&16
109	CCCAGGCTGGAGTGCAGTGG	2	ENST00000588534	75	hsa-miR-1285-3p	ENST00000588534	78	ENST00000505153&5631&16
109	CCCAGGCTGGAGTGCAGTGG	2	ENST00000310045	8785	hsa-miR-1285-3p	ENST00000310045	8788	ENST00000505153&5631&16
109	CCCAGGCTGGAGTGCAGTGG	2	ENST00000413543	3566	hsa-miR-1285-3p	ENST00000413543	3569	ENST00000505153&5631&16
109	CCCAGGCTGGAGTGCAGTGG	2	ENST00000572659	8785	hsa-miR-1285-3p	ENST00000572659	8788	ENST00000505153&5631&16
109	CCCAGGCTGGAGTGCAGTGG	2	ENST00000523879	264	hsa-miR-1285-3p	ENST00000523879	267	ENST00000505153&5631&16
109	CCCAGGCTGGAGTGCAGTGG	2	ENST00000544423	527	hsa-miR-1285-3p	ENST00000544423	530	ENST00000505153&5631&16
109	CCCAGGCTGGAGTGCAGTGG	2	ENST00000442850	84	hsa-miR-1285-3p	ENST00000442850	87	ENST00000505153&5631&16
109	CCCAGGCTGGAGTGCAGTGG	2	ENST00000481134	1515	hsa-miR-1285-3p	ENST00000481134	1518	ENST00000505153&5631&16
109	CCCAGGCTGGAGTGCAGTGG	2	ENST00000366374	105	hsa-miR-1285-3p	ENST00000366374	108	ENST00000505153&5631&16
109	CCCAGGCTGGAGTGCAGTGG	2	ENST00000573732	680	hsa-miR-1285-3p	ENST00000573732	683	ENST00000505153&5631&16
109	CCCAGGCTGGAGTGCAGTGG	2	ENST00000597720	680	hsa-miR-1285-3p	ENST00000597720	683	ENST00000505153&5631&16
109	CCCAGGCTGGAGTGCAGTGG	2	ENST00000598250	680	hsa-miR-1285-3p	ENST00000598250	683	ENST00000505153&5631&16
109	CCCAGGCTGGAGTGCAGTGG	2	ENST00000594995	680	hsa-miR-1285-3p	ENST00000594995	683	ENST00000505153&5631&16
109	CCCAGGCTGGAGTGCAGTGG	2	ENST00000598631	680	hsa-miR-1285-3p	ENST00000598631	683	ENST00000505153&5631&16
109	CCCAGGCTGGAGTGCAGTGG	2	ENST00000595501	248	hsa-miR-1273a	ENST00000595501	254	ENST00000505153&5631&16
109	CCCAGGCTGGAGTGCAGTGG	2	ENST00000473778	1242	hsa-miR-1273a	ENST00000473778	1248	ENST00000505153&5631&16
109	CCCAGGCTGGAGTGCAGTGG	2	ENST00000503602	1036	hsa-miR-1273a	ENST00000503602	1042	ENST00000505153&5631&16
109	CCCAGGCTGGAGTGCAGTGG	2	ENST00000359815	30	hsa-miR-1273a	ENST00000359815	36	ENST00000505153&5631&16
109	CCCAGGCTGGAGTGCAGTGG	2	ENST00000562449	22	hsa-miR-1273a	ENST00000562449	28	ENST00000505153&5631&16
109	CCCAGGCTGGAGTGCAGTGG	2	ENST00000479136	28	hsa-miR-1273a	ENST00000479136	34	ENST00000505153&5631&16
109	CCCAGGCTGGAGTGCAGTGG	2	ENST00000470464	2427	hsa-miR-1273a	ENST00000470464	2433	ENST00000505153&5631&16
109	CCCAGGCTGGAGTGCAGTGG	2	ENST00000485585	2427	hsa-miR-1273a	ENST00000485585	2433	ENST00000505153&5631&16
109	CCCAGGCTGGAGTGCAGTGG	2	ENST00000495194	2426	hsa-miR-1273a	ENST00000495194	2432	ENST00000505153&5631&16
109	CCCAGGCTGGAGTGCAGTGG	2	ENST00000486105	2425	hsa-miR-1273a	ENST00000486105	2431	ENST00000505153&5631&16
109	CCCAGGCTGGAGTGCAGTGG	2	ENST00000475993	2425	hsa-miR-1273a	ENST00000475993	2431	ENST00000505153&5631&16
109	CCCAGGCTGGAGTGCAGTGG	2	ENST00000529187	2814	hsa-miR-1273a	ENST00000529187	2820	ENST00000505153&5631&16
109	CCCAGGCTGGAGTGCAGTGG	2	ENST00000531346	2663	hsa-miR-1273a	ENST00000531346	2669	ENST00000505153&5631&16
109	CCCAGGCTGGAGTGCAGTGG	2	ENST00000375095	3030	hsa-miR-1273a	ENST00000375095	3036	ENST00000505153&5631&16
109	CCCAGGCTGGAGTGCAGTGG	2	ENST00000494413	2425	hsa-miR-1273a	ENST00000494413	2431	ENST00000505153&5631&16
109	CCCAGGCTGGAGTGCAGTGG	2	ENST00000475528	2427	hsa-miR-1273a	ENST00000475528	2433	ENST00000505153&5631&16
109	CCCAGGCTGGAGTGCAGTGG	2	ENST00000547793	34	hsa-miR-1273a	ENST00000547793	40	ENST00000505153&5631&16
109	CCCAGGCTGGAGTGCAGTGG	2	ENST00000366261	52	hsa-miR-1273a	ENST00000366261	58	ENST00000505153&5631&16
109	CCCAGGCTGGAGTGCAGTGG	2	ENST00000504241	1914	hsa-miR-1273a	ENST00000504241	1920	ENST00000505153&5631&16
109	CCCAGGCTGGAGTGCAGTGG	2	ENST00000275053	6737	hsa-miR-1273a	ENST00000275053	6743	ENST00000505153&5631&16
109	CCCAGGCTGGAGTGCAGTGG	2	ENST00000588024	124	hsa-miR-1273a	ENST00000588024	130	ENST00000505153&5631&16
109	CCCAGGCTGGAGTGCAGTGG	2	ENST00000537394	444	hsa-miR-1273a	ENST00000537394	450	ENST00000505153&5631&16
109	CCCAGGCTGGAGTGCAGTGG	2	ENST00000548157	215	hsa-miR-1972	ENST00000548157	304	ENST00000505153&5631&16
109	CCCAGGCTGGAGTGCAGTGG	2	ENST00000547850	215	hsa-miR-1972	ENST00000547850	304	ENST00000505153&5631&16
109	CCCAGGCTGGAGTGCAGTGG	2	ENST00000590071	4399	hsa-miR-1273c	ENST00000590071	4105	ENST00000505153&5631&16
109	CCCAGGCTGGAGTGCAGTGG	2	ENST00000500236	623	hsa-miR-1273e	ENST00000500236	567	ENST00000505153&5631&16
109	CCCAGGCTGGAGTGCAGTGG	2	ENST00000489288	1033	hsa-miR-1273e	ENST00000489288	977	ENST00000505153&5631&16
109	CCCAGGCTGGAGTGCAGTGG	2	ENST00000464682	788	hsa-miR-1273e	ENST00000464682	732	ENST00000505153&5631&16
109	CCCAGGCTGGAGTGCAGTGG	2	ENST00000461997	1007	hsa-miR-1273e	ENST00000461997	951	ENST00000505153&5631&16
109	CCCAGGCTGGAGTGCAGTGG	2	ENST00000599628	1486	hsa-miR-1273e	ENST00000599628	979	ENST00000505153&5631&16
109	CCCAGGCTGGAGTGCAGTGG	2	ENST00000556243	245	hsa-miR-1273e	ENST00000556243	172	ENST00000505153&5631&16
109	CCCAGGCTGGAGTGCAGTGG	2	ENST00000566036	63	hsa-miR-1273f	ENST00000566036	20	ENST00000505153&5631&16
109	CCCAGGCTGGAGTGCAGTGG	2	ENST00000455424	653	hsa-miR-1273g-3p	ENST00000455424	641	ENST00000505153&5631&16
109	CCCAGGCTGGAGTGCAGTGG	2	ENST00000586025	2354	hsa-miR-1273g-3p	ENST00000586025	1863	ENST00000505153&5631&16
109	CCCAGGCTGGAGTGCAGTGG	2	ENST00000586025	2354	hsa-miR-1273g-3p	ENST00000586025	2342	ENST00000505153&5631&16
109	CCCAGGCTGGAGTGCAGTGG	2	ENST00000357137	5385	hsa-miR-1273f	ENST00000357137	5342	ENST00000505153&5631&16
109	CCCAGGCTGGAGTGCAGTGG	2	ENST00000432854	3529	hsa-miR-1273f	ENST00000432854	3486	ENST00000505153&5631&16
109	CCCAGGCTGGAGTGCAGTGG	2	ENST00000600625	1956	hsa-miR-1273f	ENST00000600625	1913	ENST00000505153&5631&16
109	CCCAGGCTGGAGTGCAGTGG	2	ENST00000324894	2030	hsa-miR-1273f	ENST00000324894	1987	ENST00000505153&5631&16
109	CCCAGGCTGGAGTGCAGTGG	2	ENST00000592861	201	hsa-miR-1273f	ENST00000592861	159	ENST00000505153&5631&16
109	CCCAGGCTGGAGTGCAGTGG	2	ENST00000523129	1746	hsa-miR-1273g-3p	ENST00000523129	1439	ENST00000505153&5631&16
109	CCCAGGCTGGAGTGCAGTGG	2	ENST00000416209	1746	hsa-miR-1273g-3p	ENST00000416209	1439	ENST00000505153&5631&16
109	CCCAGGCTGGAGTGCAGTGG	2	ENST00000590717	2615	hsa-miR-1273g-3p	ENST00000590717	2603	ENST00000505153&5631&16
109	CCCAGGCTGGAGTGCAGTGG	2	ENST00000589137	941	hsa-miR-1273g-3p	ENST00000589137	929	ENST00000505153&5631&16
109	CCCAGGCTGGAGTGCAGTGG	2	ENST00000600299	572	hsa-miR-1273g-3p	ENST00000600299	560	ENST00000505153&5631&16
109	CCCAGGCTGGAGTGCAGTGG	2	ENST00000600850	868	hsa-miR-1273g-3p	ENST00000600850	856	ENST00000505153&5631&16
109	CCCAGGCTGGAGTGCAGTGG	2	ENST00000573007	297	hsa-miR-1273g-3p	ENST00000573007	285	ENST00000505153&5631&16
109	CCCAGGCTGGAGTGCAGTGG	2	ENST00000435295	749	hsa-miR-1273g-3p	ENST00000435295	737	ENST00000505153&5631&16
109	CCCAGGCTGGAGTGCAGTGG	2	ENST00000433033	166	hsa-miR-1273g-3p	ENST00000433033	154	ENST00000505153&5631&16
109	CCCAGGCTGGAGTGCAGTGG	2	ENST00000562965	705	hsa-miR-1273g-3p	ENST00000562965	693	ENST00000505153&5631&16
110	CAGGCTGGAGTGCAGTGGC	4	ENST00000366391	45	hsa-miR-1285-3p	ENST00000366391	50	ENST00000505153&5631&16
110	CAGGCTGGAGTGCAGTGGC	4	ENST00000588534	75	hsa-miR-1285-3p	ENST00000588534	80	ENST00000505153&5631&16
110	CAGGCTGGAGTGCAGTGGC	4	ENST00000413543	3566	hsa-miR-1285-3p	ENST00000413543	3571	ENST00000505153&5631&16
110	CAGGCTGGAGTGCAGTGGC	4	ENST00000523879	264	hsa-miR-1285-3p	ENST00000523879	269	ENST00000505153&5631&16
110	CAGGCTGGAGTGCAGTGGC	4	ENST00000544423	527	hsa-miR-1285-3p	ENST00000544423	532	ENST00000505153&5631&16
110	CAGGCTGGAGTGCAGTGGC	4	ENST00000442850	84	hsa-miR-1285-3p	ENST00000442850	89	ENST00000505153&5631&16
110	CAGGCTGGAGTGCAGTGGC	4	ENST00000473778	1242	hsa-miR-1273a	ENST00000473778	1250	ENST00000505153&5631&16
110	CAGGCTGGAGTGCAGTGGC	4	ENST00000503602	1036	hsa-miR-1273a	ENST00000503602	1044	ENST00000505153&5631&16
110	CAGGCTGGAGTGCAGTGGC	4	ENST00000359815	30	hsa-miR-1273a	ENST00000359815	38	ENST00000505153&5631&16
110	CAGGCTGGAGTGCAGTGGC	4	ENST00000470464	2427	hsa-miR-1273a	ENST00000470464	2435	ENST00000505153&5631&16
110	CAGGCTGGAGTGCAGTGGC	4	ENST00000485585	2427	hsa-miR-1273a	ENST00000485585	2435	ENST00000505153&5631&16
110	CAGGCTGGAGTGCAGTGGC	4	ENST00000495194	2426	hsa-miR-1273a	ENST00000495194	2434	ENST00000505153&5631&16
110	CAGGCTGGAGTGCAGTGGC	4	ENST00000486105	2425	hsa-miR-1273a	ENST00000486105	2433	ENST00000505153&5631&16
110	CAGGCTGGAGTGCAGTGGC	4	ENST00000475993	2425	hsa-miR-1273a	ENST00000475993	2433	ENST00000505153&5631&16
110	CAGGCTGGAGTGCAGTGGC	4	ENST00000494413	2425	hsa-miR-1273a	ENST00000494413	2433	ENST00000505153&5631&16
110	CAGGCTGGAGTGCAGTGGC	4	ENST00000475528	2427	hsa-miR-1273a	ENST00000475528	2435	ENST00000505153&5631&16
110	CAGGCTGGAGTGCAGTGGC	4	ENST00000547793	34	hsa-miR-1273a	ENST00000547793	42	ENST00000505153&5631&16
110	CAGGCTGGAGTGCAGTGGC	4	ENST00000504241	1914	hsa-miR-1273a	ENST00000504241	1922	ENST00000505153&5631&16
110	CAGGCTGGAGTGCAGTGGC	4	ENST00000275053	6737	hsa-miR-1273a	ENST00000275053	6745	ENST00000505153&5631&16
110	CAGGCTGGAGTGCAGTGGC	4	ENST00000588024	124	hsa-miR-1273a	ENST00000588024	132	ENST00000505153&5631&16
110	CAGGCTGGAGTGCAGTGGC	4	ENST00000537394	444	hsa-miR-1273a	ENST00000537394	452	ENST00000505153&5631&16
110	CAGGCTGGAGTGCAGTGGC	4	ENST00000563972	987	hsa-miR-1972	ENST00000563972	1222	ENST00000505153&5631&16
110	CAGGCTGGAGTGCAGTGGC	4	ENST00000548157	215	hsa-miR-1972	ENST00000548157	306	ENST00000505153&5631&16
110	CAGGCTGGAGTGCAGTGGC	4	ENST00000547850	215	hsa-miR-1972	ENST00000547850	306	ENST00000505153&5631&16
110	CAGGCTGGAGTGCAGTGGC	4	ENST00000590071	4399	hsa-miR-1273c	ENST00000590071	4107	ENST00000505153&5631&16
110	CAGGCTGGAGTGCAGTGGC	4	ENST00000450492	111	hsa-miR-1273e	ENST00000450492	57	ENST00000505153&5631&16
110	CAGGCTGGAGTGCAGTGGC	4	ENST00000330266	3259	hsa-miR-1273e	ENST00000330266	3205	ENST00000505153&5631&16
110	CAGGCTGGAGTGCAGTGGC	4	ENST00000527806	1530	hsa-miR-1273e	ENST00000527806	1476	ENST00000505153&5631&16
110	CAGGCTGGAGTGCAGTGGC	4	ENST00000281031	2115	hsa-miR-1273e	ENST00000281031	2061	ENST00000505153&5631&16
110	CAGGCTGGAGTGCAGTGGC	4	ENST00000359680	1588	hsa-miR-1273e	ENST00000359680	1534	ENST00000505153&5631&16
110	CAGGCTGGAGTGCAGTGGC	4	ENST00000453655	1751	hsa-miR-1273e	ENST00000453655	1697	ENST00000505153&5631&16
110	CAGGCTGGAGTGCAGTGGC	4	ENST00000380579	1651	hsa-miR-1273e	ENST00000380579	1597	ENST00000505153&5631&16
110	CAGGCTGGAGTGCAGTGGC	4	ENST00000599628	1486	hsa-miR-1273e	ENST00000599628	981	ENST00000505153&5631&16
110	CAGGCTGGAGTGCAGTGGC	4	ENST00000556243	245	hsa-miR-1273e	ENST00000556243	174	ENST00000505153&5631&16
110	CAGGCTGGAGTGCAGTGGC	4	ENST00000523129	2063	hsa-miR-1273g-3p	ENST00000523129	2053	ENST00000505153&5631&16
110	CAGGCTGGAGTGCAGTGGC	4	ENST00000416209	2064	hsa-miR-1273g-3p	ENST00000416209	2054	ENST00000505153&5631&16
110	CAGGCTGGAGTGCAGTGGC	4	ENST00000566036	63	hsa-miR-1273f	ENST00000566036	22	ENST00000505153&5631&16
110	CAGGCTGGAGTGCAGTGGC	4	ENST00000586025	2354	hsa-miR-1273g-3p	ENST00000586025	1865	ENST00000505153&5631&16
110	CAGGCTGGAGTGCAGTGGC	4	ENST00000586025	2354	hsa-miR-1273g-3p	ENST00000586025	2173	ENST00000505153&5631&16
110	CAGGCTGGAGTGCAGTGGC	4	ENST00000586025	2354	hsa-miR-1273g-3p	ENST00000586025	2344	ENST00000505153&5631&16
110	CAGGCTGGAGTGCAGTGGC	4	ENST00000357137	5385	hsa-miR-1273f	ENST00000357137	5344	ENST00000505153&5631&16
110	CAGGCTGGAGTGCAGTGGC	4	ENST00000432854	3529	hsa-miR-1273f	ENST00000432854	3488	ENST00000505153&5631&16
110	CAGGCTGGAGTGCAGTGGC	4	ENST00000480612	266	hsa-miR-1273f	ENST00000480612	225	ENST00000505153&5631&16
110	CAGGCTGGAGTGCAGTGGC	4	ENST00000523129	1746	hsa-miR-1273g-3p	ENST00000523129	1441	ENST00000505153&5631&16
110	CAGGCTGGAGTGCAGTGGC	4	ENST00000416209	1746	hsa-miR-1273g-3p	ENST00000416209	1441	ENST00000505153&5631&16
110	CAGGCTGGAGTGCAGTGGC	4	ENST00000518639	956	hsa-miR-1273g-3p	ENST00000518639	946	ENST00000505153&5631&16
110	CAGGCTGGAGTGCAGTGGC	4	ENST00000529545	449	hsa-miR-1273g-3p	ENST00000529545	439	ENST00000505153&5631&16
110	CAGGCTGGAGTGCAGTGGC	4	ENST00000570436	449	hsa-miR-1273g-3p	ENST00000570436	439	ENST00000505153&5631&16
110	CAGGCTGGAGTGCAGTGGC	4	ENST00000575527	2134	hsa-miR-1273g-3p	ENST00000575527	2124	ENST00000505153&5631&16
110	CAGGCTGGAGTGCAGTGGC	4	ENST00000535028	638	hsa-miR-1273g-3p	ENST00000535028	628	ENST00000505153&5631&16
110	CAGGCTGGAGTGCAGTGGC	4	ENST00000536349	1775	hsa-miR-1273g-3p	ENST00000536349	1765	ENST00000505153&5631&16
110	CAGGCTGGAGTGCAGTGGC	4	ENST00000369066	6364	hsa-miR-1273g-3p	ENST00000369066	6354	ENST00000505153&5631&16
110	CAGGCTGGAGTGCAGTGGC	4	ENST00000564309	366	hsa-miR-1273g-3p	ENST00000564309	356	ENST00000505153&5631&16
110	CAGGCTGGAGTGCAGTGGC	4	ENST00000595753	4232	hsa-miR-1273g-3p	ENST00000595753	4222	ENST00000505153&5631&16
110	CAGGCTGGAGTGCAGTGGC	4	ENST00000462315	3700	hsa-miR-1273g-3p	ENST00000462315	3690	ENST00000505153&5631&16
110	CAGGCTGGAGTGCAGTGGC	4	ENST00000483134	1761	hsa-miR-1273g-3p	ENST00000483134	1751	ENST00000505153&5631&16
110	CAGGCTGGAGTGCAGTGGC	4	ENST00000592904	879	hsa-miR-1273g-3p	ENST00000592904	869	ENST00000505153&5631&16
110	CAGGCTGGAGTGCAGTGGC	4	ENST00000462616	2438	hsa-miR-1273g-3p	ENST00000462616	2428	ENST00000505153&5631&16
110	CAGGCTGGAGTGCAGTGGC	4	ENST00000474456	999	hsa-miR-1273g-3p	ENST00000474456	989	ENST00000505153&5631&16
110	CAGGCTGGAGTGCAGTGGC	4	ENST00000322989	1236	hsa-miR-1273g-3p	ENST00000322989	1226	ENST00000505153&5631&16
110	CAGGCTGGAGTGCAGTGGC	4	ENST00000380079	3054	hsa-miR-1273g-3p	ENST00000380079	3044	ENST00000505153&5631&16
110	CAGGCTGGAGTGCAGTGGC	4	ENST00000492597	258	hsa-miR-1273g-3p	ENST00000492597	248	ENST00000505153&5631&16
110	CAGGCTGGAGTGCAGTGGC	4	ENST00000464571	1286	hsa-miR-1273g-3p	ENST00000464571	1276	ENST00000505153&5631&16
110	CAGGCTGGAGTGCAGTGGC	4	ENST00000308062	1289	hsa-miR-1273g-3p	ENST00000308062	1279	ENST00000505153&5631&16
110	CAGGCTGGAGTGCAGTGGC	4	ENST00000492534	703	hsa-miR-1273g-3p	ENST00000492534	693	ENST00000505153&5631&16
110	CAGGCTGGAGTGCAGTGGC	4	ENST00000600299	572	hsa-miR-1273g-3p	ENST00000600299	562	ENST00000505153&5631&16
110	CAGGCTGGAGTGCAGTGGC	4	ENST00000527570	245	hsa-miR-1273g-3p	ENST00000527570	235	ENST00000505153&5631&16
110	CAGGCTGGAGTGCAGTGGC	4	ENST00000505031	1227	hsa-miR-1273g-3p	ENST00000505031	1217	ENST00000505153&5631&16
110	CAGGCTGGAGTGCAGTGGC	4	ENST00000399576	238	hsa-miR-1273g-3p	ENST00000399576	228	ENST00000505153&5631&16
110	CAGGCTGGAGTGCAGTGGC	4	ENST00000509563	379	hsa-miR-1273g-3p	ENST00000509563	369	ENST00000505153&5631&16
110	CAGGCTGGAGTGCAGTGGC	4	ENST00000511063	1244	hsa-miR-1273g-3p	ENST00000511063	1234	ENST00000505153&5631&16
110	CAGGCTGGAGTGCAGTGGC	4	ENST00000448248	904	hsa-miR-1273g-3p	ENST00000448248	894	ENST00000505153&5631&16
110	CAGGCTGGAGTGCAGTGGC	4	ENST00000514664	2941	hsa-miR-1273g-3p	ENST00000514664	2931	ENST00000505153&5631&16
110	CAGGCTGGAGTGCAGTGGC	4	ENST00000215832	7448	hsa-miR-1273g-3p	ENST00000215832	7438	ENST00000505153&5631&16
110	CAGGCTGGAGTGCAGTGGC	4	ENST00000398475	2134	hsa-miR-1273g-3p	ENST00000398475	2124	ENST00000505153&5631&16
110	CAGGCTGGAGTGCAGTGGC	4	ENST00000464478	391	hsa-miR-1273g-3p	ENST00000464478	381	ENST00000505153&5631&16
110	CAGGCTGGAGTGCAGTGGC	4	ENST00000371727	606	hsa-miR-1273g-3p	ENST00000371727	596	ENST00000505153&5631&16
110	CAGGCTGGAGTGCAGTGGC	4	ENST00000459674	1161	hsa-miR-1273g-3p	ENST00000459674	1151	ENST00000505153&5631&16
110	CAGGCTGGAGTGCAGTGGC	4	ENST00000403385	1283	hsa-miR-1273g-3p	ENST00000403385	1273	ENST00000505153&5631&16
110	CAGGCTGGAGTGCAGTGGC	4	ENST00000480655	350	hsa-miR-1273g-3p	ENST00000480655	340	ENST00000505153&5631&16
111	CACCATGTTGGTCAGGCT	2	ENST00000585465	1694	hsa-miR-1273a	ENST00000585465	1854	ENST00000438151&1765&14	ENST00000568911&4774&15	ENST00000480258&4702&14	ENST00000446101&3303&15	ENST00000366223&2161&15	ENST00000573424&3199&15	ENST00000382349&5151&15	ENST00000394434&4550&15	ENST00000569262&1487&15	ENST00000525547&1483&14	ENST00000524595&872&14	ENST00000280357&927&14	ENST00000562474&366&15	ENST00000409982&842&14	ENST00000527614&3059&14	ENST00000245255&3711&14	ENST00000002596&5514&14	ENST00000597060&1776&15	ENST00000408988&1961&15	ENST00000542023&940&15	ENST00000240652&883&15	ENST00000476203&3841&18	ENST00000370791&5089&14	ENST00000389243&3976&15	ENST00000549494&179&15	ENST00000450160&963&11	ENST00000426723&802&11	ENST00000426689&941&11	ENST00000415644&781&11	ENST00000444069&760&11	ENST00000452211&1171&11	ENST00000421967&1003&11	ENST00000417892&2758&14	ENST00000475846&2758&14	ENST00000457866&4477&14	ENST00000367800&4395&14	ENST00000219837&4090&15	ENST00000471863&2092&14	ENST00000375077&2229&14	ENST00000343933&2405&14	ENST00000311089&2123&15	ENST00000361070&4465&14
111	CACCATGTTGGTCAGGCT	2	ENST00000590071	4399	hsa-miR-1273c	ENST00000590071	4260	ENST00000438151&1765&14	ENST00000568911&4774&15	ENST00000480258&4702&14	ENST00000446101&3303&15	ENST00000366223&2161&15	ENST00000573424&3199&15	ENST00000382349&5151&15	ENST00000394434&4550&15	ENST00000569262&1487&15	ENST00000525547&1483&14	ENST00000524595&872&14	ENST00000280357&927&14	ENST00000562474&366&15	ENST00000409982&842&14	ENST00000527614&3059&14	ENST00000245255&3711&14	ENST00000002596&5514&14	ENST00000597060&1776&15	ENST00000408988&1961&15	ENST00000542023&940&15	ENST00000240652&883&15	ENST00000476203&3841&18	ENST00000370791&5089&14	ENST00000389243&3976&15	ENST00000549494&179&15	ENST00000450160&963&11	ENST00000426723&802&11	ENST00000426689&941&11	ENST00000415644&781&11	ENST00000444069&760&11	ENST00000452211&1171&11	ENST00000421967&1003&11	ENST00000417892&2758&14	ENST00000475846&2758&14	ENST00000457866&4477&14	ENST00000367800&4395&14	ENST00000219837&4090&15	ENST00000471863&2092&14	ENST00000375077&2229&14	ENST00000343933&2405&14	ENST00000311089&2123&15	ENST00000361070&4465&14
111	CACCATGTTGGTCAGGCT	2	ENST00000568109	223	hsa-miR-1273e	ENST00000568109	323	ENST00000438151&1765&14	ENST00000568911&4774&15	ENST00000480258&4702&14	ENST00000446101&3303&15	ENST00000366223&2161&15	ENST00000573424&3199&15	ENST00000382349&5151&15	ENST00000394434&4550&15	ENST00000569262&1487&15	ENST00000525547&1483&14	ENST00000524595&872&14	ENST00000280357&927&14	ENST00000562474&366&15	ENST00000409982&842&14	ENST00000527614&3059&14	ENST00000245255&3711&14	ENST00000002596&5514&14	ENST00000597060&1776&15	ENST00000408988&1961&15	ENST00000542023&940&15	ENST00000240652&883&15	ENST00000476203&3841&18	ENST00000370791&5089&14	ENST00000389243&3976&15	ENST00000549494&179&15	ENST00000450160&963&11	ENST00000426723&802&11	ENST00000426689&941&11	ENST00000415644&781&11	ENST00000444069&760&11	ENST00000452211&1171&11	ENST00000421967&1003&11	ENST00000417892&2758&14	ENST00000475846&2758&14	ENST00000457866&4477&14	ENST00000367800&4395&14	ENST00000219837&4090&15	ENST00000471863&2092&14	ENST00000375077&2229&14	ENST00000343933&2405&14	ENST00000311089&2123&15	ENST00000361070&4465&14
111	CACCATGTTGGTCAGGCT	2	ENST00000566036	63	hsa-miR-1273f	ENST00000566036	179	ENST00000438151&1765&14	ENST00000568911&4774&15	ENST00000480258&4702&14	ENST00000446101&3303&15	ENST00000366223&2161&15	ENST00000573424&3199&15	ENST00000382349&5151&15	ENST00000394434&4550&15	ENST00000569262&1487&15	ENST00000525547&1483&14	ENST00000524595&872&14	ENST00000280357&927&14	ENST00000562474&366&15	ENST00000409982&842&14	ENST00000527614&3059&14	ENST00000245255&3711&14	ENST00000002596&5514&14	ENST00000597060&1776&15	ENST00000408988&1961&15	ENST00000542023&940&15	ENST00000240652&883&15	ENST00000476203&3841&18	ENST00000370791&5089&14	ENST00000389243&3976&15	ENST00000549494&179&15	ENST00000450160&963&11	ENST00000426723&802&11	ENST00000426689&941&11	ENST00000415644&781&11	ENST00000444069&760&11	ENST00000452211&1171&11	ENST00000421967&1003&11	ENST00000417892&2758&14	ENST00000475846&2758&14	ENST00000457866&4477&14	ENST00000367800&4395&14	ENST00000219837&4090&15	ENST00000471863&2092&14	ENST00000375077&2229&14	ENST00000343933&2405&14	ENST00000311089&2123&15	ENST00000361070&4465&14
111	CACCATGTTGGTCAGGCT	2	ENST00000525088	1550	hsa-miR-1273g-3p	ENST00000525088	1839	ENST00000438151&1765&14	ENST00000568911&4774&15	ENST00000480258&4702&14	ENST00000446101&3303&15	ENST00000366223&2161&15	ENST00000573424&3199&15	ENST00000382349&5151&15	ENST00000394434&4550&15	ENST00000569262&1487&15	ENST00000525547&1483&14	ENST00000524595&872&14	ENST00000280357&927&14	ENST00000562474&366&15	ENST00000409982&842&14	ENST00000527614&3059&14	ENST00000245255&3711&14	ENST00000002596&5514&14	ENST00000597060&1776&15	ENST00000408988&1961&15	ENST00000542023&940&15	ENST00000240652&883&15	ENST00000476203&3841&18	ENST00000370791&5089&14	ENST00000389243&3976&15	ENST00000549494&179&15	ENST00000450160&963&11	ENST00000426723&802&11	ENST00000426689&941&11	ENST00000415644&781&11	ENST00000444069&760&11	ENST00000452211&1171&11	ENST00000421967&1003&11	ENST00000417892&2758&14	ENST00000475846&2758&14	ENST00000457866&4477&14	ENST00000367800&4395&14	ENST00000219837&4090&15	ENST00000471863&2092&14	ENST00000375077&2229&14	ENST00000343933&2405&14	ENST00000311089&2123&15	ENST00000361070&4465&14
112	AGGCTGAGGCAGGAGAATTGCT	2	ENST00000574773	2509	hsa-miR-5095	ENST00000574773	2668	ENST00000421331&1848&13
112	AGGCTGAGGCAGGAGAATTGCT	2	ENST00000558411	1935	hsa-miR-5096	ENST00000558411	2017	ENST00000421331&1848&13
112	AGGCTGAGGCAGGAGAATTGCT	2	ENST00000554660	866	hsa-miR-5096	ENST00000554660	945	ENST00000421331&1848&13
112	AGGCTGAGGCAGGAGAATTGCT	2	ENST00000527614	3118	hsa-miR-5585-3p	ENST00000527614	3128	ENST00000421331&1848&13
113	AGAATGGCATGAACCTGGG	2	ENST00000510256	656	hsa-miR-5585-3p	ENST00000510256	679	ENST00000260257&2186&14	ENST00000296161&2687&14	ENST00000357460&2583&14	ENST00000484909&1335&14	ENST00000573902&2186&14	ENST00000487256&852&14	ENST00000343366&928&14	ENST00000397190&383&14	ENST00000552148&158&14
113	AGAATGGCATGAACCTGGG	2	ENST00000489074	656	hsa-miR-5585-3p	ENST00000489074	679	ENST00000260257&2186&14	ENST00000296161&2687&14	ENST00000357460&2583&14	ENST00000484909&1335&14	ENST00000573902&2186&14	ENST00000487256&852&14	ENST00000343366&928&14	ENST00000397190&383&14	ENST00000552148&158&14
114	TGGTGCGATCTCGGCTCA	2	ENST00000585465	1694	hsa-miR-1273a	ENST00000585465	1717	ENST00000584087&2869&11	ENST00000549056&30&13	ENST00000528173&1321&11	ENST00000527674&1751&11	ENST00000303052&4341&15	ENST00000484301&3358&15	ENST00000462067&910&11	ENST00000488606&1423&11	ENST00000369145&2869&11	ENST00000476245&1860&11
114	TGGTGCGATCTCGGCTCA	2	ENST00000525088	1550	hsa-miR-1273g-3p	ENST00000525088	1555	ENST00000584087&2869&11	ENST00000549056&30&13	ENST00000528173&1321&11	ENST00000527674&1751&11	ENST00000303052&4341&15	ENST00000484301&3358&15	ENST00000462067&910&11	ENST00000488606&1423&11	ENST00000369145&2869&11	ENST00000476245&1860&11
114	TGGTGCGATCTCGGCTCA	2	ENST00000464609	31	hsa-miR-1273g-3p	ENST00000464609	36	ENST00000584087&2869&11	ENST00000549056&30&13	ENST00000528173&1321&11	ENST00000527674&1751&11	ENST00000303052&4341&15	ENST00000484301&3358&15	ENST00000462067&910&11	ENST00000488606&1423&11	ENST00000369145&2869&11	ENST00000476245&1860&11
114	TGGTGCGATCTCGGCTCA	2	ENST00000562965	705	hsa-miR-1273g-3p	ENST00000562965	710	ENST00000584087&2869&11	ENST00000549056&30&13	ENST00000528173&1321&11	ENST00000527674&1751&11	ENST00000303052&4341&15	ENST00000484301&3358&15	ENST00000462067&910&11	ENST00000488606&1423&11	ENST00000369145&2869&11	ENST00000476245&1860&11
115	GCTGGGATTACAGGCATGAGCCACC	3	ENST00000515103	627	hsa-miR-1273e	ENST00000515103	762	ENST00000575402&2677&10	ENST00000575402&965&10	ENST00000492956&2878&17	ENST00000350498&2233&10
115	GCTGGGATTACAGGCATGAGCCACC	3	ENST00000455424	653	hsa-miR-1273g-3p	ENST00000455424	864	ENST00000575402&2677&10	ENST00000575402&965&10	ENST00000492956&2878&17	ENST00000350498&2233&10
116	GCGGAGGTTGCAGTGAGCCAAGA	5	ENST00000483681	1615	hsa-miR-1285-5p	ENST00000483681	1561	ENST00000394856&2421&12	ENST00000514353&2493&12
116	GCGGAGGTTGCAGTGAGCCAAGA	5	ENST00000595787	5312	hsa-miR-5095	ENST00000595787	5502	ENST00000394856&2421&12	ENST00000514353&2493&12
116	GCGGAGGTTGCAGTGAGCCAAGA	5	ENST00000340855	5312	hsa-miR-5095	ENST00000340855	5502	ENST00000394856&2421&12	ENST00000514353&2493&12
116	GCGGAGGTTGCAGTGAGCCAAGA	5	ENST00000568911	4762	hsa-miR-5096	ENST00000568911	4875	ENST00000394856&2421&12	ENST00000514353&2493&12
116	GCGGAGGTTGCAGTGAGCCAAGA	5	ENST00000563777	3249	hsa-miR-5585-3p	ENST00000563777	3293	ENST00000394856&2421&12	ENST00000514353&2493&12
117	GTCGCCCAGGCTGGAGTG	3	ENST00000595501	248	hsa-miR-1273a	ENST00000595501	250	ENST00000506172&1508&16	ENST00000454877&547&16	ENST00000326237&291&16	ENST00000366264&309&16	ENST00000426371&1099&16	ENST00000583900&2596&16
117	GTCGCCCAGGCTGGAGTG	3	ENST00000473778	1242	hsa-miR-1273a	ENST00000473778	1244	ENST00000506172&1508&16	ENST00000454877&547&16	ENST00000326237&291&16	ENST00000366264&309&16	ENST00000426371&1099&16	ENST00000583900&2596&16
117	GTCGCCCAGGCTGGAGTG	3	ENST00000503474	1098	hsa-miR-1273a	ENST00000503474	1100	ENST00000506172&1508&16	ENST00000454877&547&16	ENST00000326237&291&16	ENST00000366264&309&16	ENST00000426371&1099&16	ENST00000583900&2596&16
117	GTCGCCCAGGCTGGAGTG	3	ENST00000503602	1036	hsa-miR-1273a	ENST00000503602	1038	ENST00000506172&1508&16	ENST00000454877&547&16	ENST00000326237&291&16	ENST00000366264&309&16	ENST00000426371&1099&16	ENST00000583900&2596&16
117	GTCGCCCAGGCTGGAGTG	3	ENST00000359815	30	hsa-miR-1273a	ENST00000359815	32	ENST00000506172&1508&16	ENST00000454877&547&16	ENST00000326237&291&16	ENST00000366264&309&16	ENST00000426371&1099&16	ENST00000583900&2596&16
117	GTCGCCCAGGCTGGAGTG	3	ENST00000216471	2434	hsa-miR-1273a	ENST00000216471	2436	ENST00000506172&1508&16	ENST00000454877&547&16	ENST00000326237&291&16	ENST00000366264&309&16	ENST00000426371&1099&16	ENST00000583900&2596&16
117	GTCGCCCAGGCTGGAGTG	3	ENST00000562449	22	hsa-miR-1273a	ENST00000562449	24	ENST00000506172&1508&16	ENST00000454877&547&16	ENST00000326237&291&16	ENST00000366264&309&16	ENST00000426371&1099&16	ENST00000583900&2596&16
117	GTCGCCCAGGCTGGAGTG	3	ENST00000479136	28	hsa-miR-1273a	ENST00000479136	30	ENST00000506172&1508&16	ENST00000454877&547&16	ENST00000326237&291&16	ENST00000366264&309&16	ENST00000426371&1099&16	ENST00000583900&2596&16
117	GTCGCCCAGGCTGGAGTG	3	ENST00000585465	1694	hsa-miR-1273a	ENST00000585465	1696	ENST00000506172&1508&16	ENST00000454877&547&16	ENST00000326237&291&16	ENST00000366264&309&16	ENST00000426371&1099&16	ENST00000583900&2596&16
117	GTCGCCCAGGCTGGAGTG	3	ENST00000395530	5837	hsa-miR-1273a	ENST00000395530	5839	ENST00000506172&1508&16	ENST00000454877&547&16	ENST00000326237&291&16	ENST00000366264&309&16	ENST00000426371&1099&16	ENST00000583900&2596&16
117	GTCGCCCAGGCTGGAGTG	3	ENST00000470464	2427	hsa-miR-1273a	ENST00000470464	2429	ENST00000506172&1508&16	ENST00000454877&547&16	ENST00000326237&291&16	ENST00000366264&309&16	ENST00000426371&1099&16	ENST00000583900&2596&16
117	GTCGCCCAGGCTGGAGTG	3	ENST00000485585	2427	hsa-miR-1273a	ENST00000485585	2429	ENST00000506172&1508&16	ENST00000454877&547&16	ENST00000326237&291&16	ENST00000366264&309&16	ENST00000426371&1099&16	ENST00000583900&2596&16
117	GTCGCCCAGGCTGGAGTG	3	ENST00000495194	2426	hsa-miR-1273a	ENST00000495194	2428	ENST00000506172&1508&16	ENST00000454877&547&16	ENST00000326237&291&16	ENST00000366264&309&16	ENST00000426371&1099&16	ENST00000583900&2596&16
117	GTCGCCCAGGCTGGAGTG	3	ENST00000486105	2425	hsa-miR-1273a	ENST00000486105	2427	ENST00000506172&1508&16	ENST00000454877&547&16	ENST00000326237&291&16	ENST00000366264&309&16	ENST00000426371&1099&16	ENST00000583900&2596&16
117	GTCGCCCAGGCTGGAGTG	3	ENST00000478207	192	hsa-miR-1273a	ENST00000478207	194	ENST00000506172&1508&16	ENST00000454877&547&16	ENST00000326237&291&16	ENST00000366264&309&16	ENST00000426371&1099&16	ENST00000583900&2596&16
117	GTCGCCCAGGCTGGAGTG	3	ENST00000475993	2425	hsa-miR-1273a	ENST00000475993	2427	ENST00000506172&1508&16	ENST00000454877&547&16	ENST00000326237&291&16	ENST00000366264&309&16	ENST00000426371&1099&16	ENST00000583900&2596&16
117	GTCGCCCAGGCTGGAGTG	3	ENST00000529187	2814	hsa-miR-1273a	ENST00000529187	2816	ENST00000506172&1508&16	ENST00000454877&547&16	ENST00000326237&291&16	ENST00000366264&309&16	ENST00000426371&1099&16	ENST00000583900&2596&16
117	GTCGCCCAGGCTGGAGTG	3	ENST00000531346	2663	hsa-miR-1273a	ENST00000531346	2665	ENST00000506172&1508&16	ENST00000454877&547&16	ENST00000326237&291&16	ENST00000366264&309&16	ENST00000426371&1099&16	ENST00000583900&2596&16
117	GTCGCCCAGGCTGGAGTG	3	ENST00000375095	3030	hsa-miR-1273a	ENST00000375095	3032	ENST00000506172&1508&16	ENST00000454877&547&16	ENST00000326237&291&16	ENST00000366264&309&16	ENST00000426371&1099&16	ENST00000583900&2596&16
117	GTCGCCCAGGCTGGAGTG	3	ENST00000494413	2425	hsa-miR-1273a	ENST00000494413	2427	ENST00000506172&1508&16	ENST00000454877&547&16	ENST00000326237&291&16	ENST00000366264&309&16	ENST00000426371&1099&16	ENST00000583900&2596&16
117	GTCGCCCAGGCTGGAGTG	3	ENST00000475528	2427	hsa-miR-1273a	ENST00000475528	2429	ENST00000506172&1508&16	ENST00000454877&547&16	ENST00000326237&291&16	ENST00000366264&309&16	ENST00000426371&1099&16	ENST00000583900&2596&16
117	GTCGCCCAGGCTGGAGTG	3	ENST00000547793	34	hsa-miR-1273a	ENST00000547793	36	ENST00000506172&1508&16	ENST00000454877&547&16	ENST00000326237&291&16	ENST00000366264&309&16	ENST00000426371&1099&16	ENST00000583900&2596&16
117	GTCGCCCAGGCTGGAGTG	3	ENST00000366261	52	hsa-miR-1273a	ENST00000366261	54	ENST00000506172&1508&16	ENST00000454877&547&16	ENST00000326237&291&16	ENST00000366264&309&16	ENST00000426371&1099&16	ENST00000583900&2596&16
117	GTCGCCCAGGCTGGAGTG	3	ENST00000560302	2601	hsa-miR-1273a	ENST00000560302	2603	ENST00000506172&1508&16	ENST00000454877&547&16	ENST00000326237&291&16	ENST00000366264&309&16	ENST00000426371&1099&16	ENST00000583900&2596&16
117	GTCGCCCAGGCTGGAGTG	3	ENST00000504241	1914	hsa-miR-1273a	ENST00000504241	1916	ENST00000506172&1508&16	ENST00000454877&547&16	ENST00000326237&291&16	ENST00000366264&309&16	ENST00000426371&1099&16	ENST00000583900&2596&16
117	GTCGCCCAGGCTGGAGTG	3	ENST00000275053	6737	hsa-miR-1273a	ENST00000275053	6739	ENST00000506172&1508&16	ENST00000454877&547&16	ENST00000326237&291&16	ENST00000366264&309&16	ENST00000426371&1099&16	ENST00000583900&2596&16
117	GTCGCCCAGGCTGGAGTG	3	ENST00000588024	124	hsa-miR-1273a	ENST00000588024	126	ENST00000506172&1508&16	ENST00000454877&547&16	ENST00000326237&291&16	ENST00000366264&309&16	ENST00000426371&1099&16	ENST00000583900&2596&16
117	GTCGCCCAGGCTGGAGTG	3	ENST00000537394	444	hsa-miR-1273a	ENST00000537394	446	ENST00000506172&1508&16	ENST00000454877&547&16	ENST00000326237&291&16	ENST00000366264&309&16	ENST00000426371&1099&16	ENST00000583900&2596&16
117	GTCGCCCAGGCTGGAGTG	3	ENST00000548157	215	hsa-miR-1972	ENST00000548157	300	ENST00000506172&1508&16	ENST00000454877&547&16	ENST00000326237&291&16	ENST00000366264&309&16	ENST00000426371&1099&16	ENST00000583900&2596&16
117	GTCGCCCAGGCTGGAGTG	3	ENST00000547850	215	hsa-miR-1972	ENST00000547850	300	ENST00000506172&1508&16	ENST00000454877&547&16	ENST00000326237&291&16	ENST00000366264&309&16	ENST00000426371&1099&16	ENST00000583900&2596&16
117	GTCGCCCAGGCTGGAGTG	3	ENST00000590071	4399	hsa-miR-1273c	ENST00000590071	4402	ENST00000506172&1508&16	ENST00000454877&547&16	ENST00000326237&291&16	ENST00000366264&309&16	ENST00000426371&1099&16	ENST00000583900&2596&16
117	GTCGCCCAGGCTGGAGTG	3	ENST00000599628	1486	hsa-miR-1273e	ENST00000599628	1426	ENST00000506172&1508&16	ENST00000454877&547&16	ENST00000326237&291&16	ENST00000366264&309&16	ENST00000426371&1099&16	ENST00000583900&2596&16
117	GTCGCCCAGGCTGGAGTG	3	ENST00000592861	201	hsa-miR-1273f	ENST00000592861	155	ENST00000506172&1508&16	ENST00000454877&547&16	ENST00000326237&291&16	ENST00000366264&309&16	ENST00000426371&1099&16	ENST00000583900&2596&16
117	GTCGCCCAGGCTGGAGTG	3	ENST00000590717	2615	hsa-miR-1273g-3p	ENST00000590717	2599	ENST00000506172&1508&16	ENST00000454877&547&16	ENST00000326237&291&16	ENST00000366264&309&16	ENST00000426371&1099&16	ENST00000583900&2596&16
117	GTCGCCCAGGCTGGAGTG	3	ENST00000589137	941	hsa-miR-1273g-3p	ENST00000589137	925	ENST00000506172&1508&16	ENST00000454877&547&16	ENST00000326237&291&16	ENST00000366264&309&16	ENST00000426371&1099&16	ENST00000583900&2596&16
117	GTCGCCCAGGCTGGAGTG	3	ENST00000600850	868	hsa-miR-1273g-3p	ENST00000600850	852	ENST00000506172&1508&16	ENST00000454877&547&16	ENST00000326237&291&16	ENST00000366264&309&16	ENST00000426371&1099&16	ENST00000583900&2596&16
118	ATGTTGGCCAGGCTGGTCTCAAACT	2	ENST00000553547	231	hsa-miR-1273d	ENST00000553547	341	ENST00000584831&819&12	ENST00000584831&1404&10	ENST00000584831&2416&12	ENST00000565152&628&18	ENST00000586503&339&10	ENST00000597346&79583&12	ENST00000597346&78821&10	ENST00000524309&321&25	ENST00000574716&1518&10	ENST00000583062&1991&10	ENST00000581621&4273&12	ENST00000393978&631&12	ENST00000401486&4532&25	ENST00000331301&1979&10	ENST00000485225&1813&12	ENST00000411857&7104&25	ENST00000596737&2117&12	ENST00000596737&2351&12	ENST00000576901&1273&25	ENST00000350274&1853&12	ENST00000336164&1946&12	ENST00000381908&1949&12	ENST00000381907&1888&12	ENST00000493091&2314&12	ENST00000429591&2602&25	ENST00000274242&3077&10	ENST00000530104&1273&25	ENST00000254941&1199&25	ENST00000254940&1707&25	ENST00000336278&7494&25	ENST00000570298&3078&25	ENST00000343407&4324&12	ENST00000542731&4968&12	ENST00000497403&5218&12	ENST00000461131&352&12	ENST00000273375&2571&12	ENST00000547740&243&13	ENST00000547697&2712&25	ENST00000530529&3063&10	ENST00000434945&3233&10	ENST00000323468&3164&10	ENST00000398809&2506&10
118	ATGTTGGCCAGGCTGGTCTCAAACT	2	ENST00000319637	1316	hsa-miR-1273e	ENST00000319637	1420	ENST00000584831&819&12	ENST00000584831&1404&10	ENST00000584831&2416&12	ENST00000565152&628&18	ENST00000586503&339&10	ENST00000597346&79583&12	ENST00000597346&78821&10	ENST00000524309&321&25	ENST00000574716&1518&10	ENST00000583062&1991&10	ENST00000581621&4273&12	ENST00000393978&631&12	ENST00000401486&4532&25	ENST00000331301&1979&10	ENST00000485225&1813&12	ENST00000411857&7104&25	ENST00000596737&2117&12	ENST00000596737&2351&12	ENST00000576901&1273&25	ENST00000350274&1853&12	ENST00000336164&1946&12	ENST00000381908&1949&12	ENST00000381907&1888&12	ENST00000493091&2314&12	ENST00000429591&2602&25	ENST00000274242&3077&10	ENST00000530104&1273&25	ENST00000254941&1199&25	ENST00000254940&1707&25	ENST00000336278&7494&25	ENST00000570298&3078&25	ENST00000343407&4324&12	ENST00000542731&4968&12	ENST00000497403&5218&12	ENST00000461131&352&12	ENST00000273375&2571&12	ENST00000547740&243&13	ENST00000547697&2712&25	ENST00000530529&3063&10	ENST00000434945&3233&10	ENST00000323468&3164&10	ENST00000398809&2506&10
118	ATGTTGGCCAGGCTGGTCTCAAACT	2	ENST00000321764	2749	hsa-miR-1273f	ENST00000321764	2865	ENST00000584831&819&12	ENST00000584831&1404&10	ENST00000584831&2416&12	ENST00000565152&628&18	ENST00000586503&339&10	ENST00000597346&79583&12	ENST00000597346&78821&10	ENST00000524309&321&25	ENST00000574716&1518&10	ENST00000583062&1991&10	ENST00000581621&4273&12	ENST00000393978&631&12	ENST00000401486&4532&25	ENST00000331301&1979&10	ENST00000485225&1813&12	ENST00000411857&7104&25	ENST00000596737&2117&12	ENST00000596737&2351&12	ENST00000576901&1273&25	ENST00000350274&1853&12	ENST00000336164&1946&12	ENST00000381908&1949&12	ENST00000381907&1888&12	ENST00000493091&2314&12	ENST00000429591&2602&25	ENST00000274242&3077&10	ENST00000530104&1273&25	ENST00000254941&1199&25	ENST00000254940&1707&25	ENST00000336278&7494&25	ENST00000570298&3078&25	ENST00000343407&4324&12	ENST00000542731&4968&12	ENST00000497403&5218&12	ENST00000461131&352&12	ENST00000273375&2571&12	ENST00000547740&243&13	ENST00000547697&2712&25	ENST00000530529&3063&10	ENST00000434945&3233&10	ENST00000323468&3164&10	ENST00000398809&2506&10
118	ATGTTGGCCAGGCTGGTCTCAAACT	2	ENST00000480612	266	hsa-miR-1273f	ENST00000480612	379	ENST00000584831&819&12	ENST00000584831&1404&10	ENST00000584831&2416&12	ENST00000565152&628&18	ENST00000586503&339&10	ENST00000597346&79583&12	ENST00000597346&78821&10	ENST00000524309&321&25	ENST00000574716&1518&10	ENST00000583062&1991&10	ENST00000581621&4273&12	ENST00000393978&631&12	ENST00000401486&4532&25	ENST00000331301&1979&10	ENST00000485225&1813&12	ENST00000411857&7104&25	ENST00000596737&2117&12	ENST00000596737&2351&12	ENST00000576901&1273&25	ENST00000350274&1853&12	ENST00000336164&1946&12	ENST00000381908&1949&12	ENST00000381907&1888&12	ENST00000493091&2314&12	ENST00000429591&2602&25	ENST00000274242&3077&10	ENST00000530104&1273&25	ENST00000254941&1199&25	ENST00000254940&1707&25	ENST00000336278&7494&25	ENST00000570298&3078&25	ENST00000343407&4324&12	ENST00000542731&4968&12	ENST00000497403&5218&12	ENST00000461131&352&12	ENST00000273375&2571&12	ENST00000547740&243&13	ENST00000547697&2712&25	ENST00000530529&3063&10	ENST00000434945&3233&10	ENST00000323468&3164&10	ENST00000398809&2506&10
118	ATGTTGGCCAGGCTGGTCTCAAACT	2	ENST00000396789	327	hsa-miR-1273g-3p	ENST00000396789	475	ENST00000584831&819&12	ENST00000584831&1404&10	ENST00000584831&2416&12	ENST00000565152&628&18	ENST00000586503&339&10	ENST00000597346&79583&12	ENST00000597346&78821&10	ENST00000524309&321&25	ENST00000574716&1518&10	ENST00000583062&1991&10	ENST00000581621&4273&12	ENST00000393978&631&12	ENST00000401486&4532&25	ENST00000331301&1979&10	ENST00000485225&1813&12	ENST00000411857&7104&25	ENST00000596737&2117&12	ENST00000596737&2351&12	ENST00000576901&1273&25	ENST00000350274&1853&12	ENST00000336164&1946&12	ENST00000381908&1949&12	ENST00000381907&1888&12	ENST00000493091&2314&12	ENST00000429591&2602&25	ENST00000274242&3077&10	ENST00000530104&1273&25	ENST00000254941&1199&25	ENST00000254940&1707&25	ENST00000336278&7494&25	ENST00000570298&3078&25	ENST00000343407&4324&12	ENST00000542731&4968&12	ENST00000497403&5218&12	ENST00000461131&352&12	ENST00000273375&2571&12	ENST00000547740&243&13	ENST00000547697&2712&25	ENST00000530529&3063&10	ENST00000434945&3233&10	ENST00000323468&3164&10	ENST00000398809&2506&10
119	ATTAGCCGGGCGTAGTGG	2	ENST00000317872	2290	hsa-miR-5095	ENST00000317872	2403	ENST00000468575&325&17	ENST00000549103&99&27	ENST00000600106&8112&27	ENST00000541730&1965&27	ENST00000521561&101&27	ENST00000396303&2382&27	ENST00000361740&2398&27	ENST00000382159&1387&29	ENST00000578895&858&27	ENST00000378621&8112&27	ENST00000261233&3381&27
120	TCAGGCTGGAGTGCAGTGGC	2	ENST00000586025	2354	hsa-miR-1273g-3p	ENST00000586025	2172	ENST00000505594&1254&16	ENST00000505153&5631&16
120	TCAGGCTGGAGTGCAGTGGC	2	ENST00000518639	956	hsa-miR-1273g-3p	ENST00000518639	945	ENST00000505594&1254&16	ENST00000505153&5631&16
120	TCAGGCTGGAGTGCAGTGGC	2	ENST00000529545	449	hsa-miR-1273g-3p	ENST00000529545	438	ENST00000505594&1254&16	ENST00000505153&5631&16
120	TCAGGCTGGAGTGCAGTGGC	2	ENST00000570436	449	hsa-miR-1273g-3p	ENST00000570436	438	ENST00000505594&1254&16	ENST00000505153&5631&16
120	TCAGGCTGGAGTGCAGTGGC	2	ENST00000535028	638	hsa-miR-1273g-3p	ENST00000535028	627	ENST00000505594&1254&16	ENST00000505153&5631&16
120	TCAGGCTGGAGTGCAGTGGC	2	ENST00000536349	1775	hsa-miR-1273g-3p	ENST00000536349	1764	ENST00000505594&1254&16	ENST00000505153&5631&16
120	TCAGGCTGGAGTGCAGTGGC	2	ENST00000369066	6364	hsa-miR-1273g-3p	ENST00000369066	6353	ENST00000505594&1254&16	ENST00000505153&5631&16
120	TCAGGCTGGAGTGCAGTGGC	2	ENST00000564309	366	hsa-miR-1273g-3p	ENST00000564309	355	ENST00000505594&1254&16	ENST00000505153&5631&16
120	TCAGGCTGGAGTGCAGTGGC	2	ENST00000462315	3700	hsa-miR-1273g-3p	ENST00000462315	3689	ENST00000505594&1254&16	ENST00000505153&5631&16
120	TCAGGCTGGAGTGCAGTGGC	2	ENST00000483134	1761	hsa-miR-1273g-3p	ENST00000483134	1750	ENST00000505594&1254&16	ENST00000505153&5631&16
120	TCAGGCTGGAGTGCAGTGGC	2	ENST00000592904	879	hsa-miR-1273g-3p	ENST00000592904	868	ENST00000505594&1254&16	ENST00000505153&5631&16
120	TCAGGCTGGAGTGCAGTGGC	2	ENST00000462616	2438	hsa-miR-1273g-3p	ENST00000462616	2427	ENST00000505594&1254&16	ENST00000505153&5631&16
120	TCAGGCTGGAGTGCAGTGGC	2	ENST00000474456	999	hsa-miR-1273g-3p	ENST00000474456	988	ENST00000505594&1254&16	ENST00000505153&5631&16
120	TCAGGCTGGAGTGCAGTGGC	2	ENST00000380079	3054	hsa-miR-1273g-3p	ENST00000380079	3043	ENST00000505594&1254&16	ENST00000505153&5631&16
120	TCAGGCTGGAGTGCAGTGGC	2	ENST00000492597	258	hsa-miR-1273g-3p	ENST00000492597	247	ENST00000505594&1254&16	ENST00000505153&5631&16
120	TCAGGCTGGAGTGCAGTGGC	2	ENST00000464571	1286	hsa-miR-1273g-3p	ENST00000464571	1275	ENST00000505594&1254&16	ENST00000505153&5631&16
120	TCAGGCTGGAGTGCAGTGGC	2	ENST00000308062	1289	hsa-miR-1273g-3p	ENST00000308062	1278	ENST00000505594&1254&16	ENST00000505153&5631&16
120	TCAGGCTGGAGTGCAGTGGC	2	ENST00000492534	703	hsa-miR-1273g-3p	ENST00000492534	692	ENST00000505594&1254&16	ENST00000505153&5631&16
120	TCAGGCTGGAGTGCAGTGGC	2	ENST00000527570	245	hsa-miR-1273g-3p	ENST00000527570	234	ENST00000505594&1254&16	ENST00000505153&5631&16
120	TCAGGCTGGAGTGCAGTGGC	2	ENST00000399576	238	hsa-miR-1273g-3p	ENST00000399576	227	ENST00000505594&1254&16	ENST00000505153&5631&16
120	TCAGGCTGGAGTGCAGTGGC	2	ENST00000509563	379	hsa-miR-1273g-3p	ENST00000509563	368	ENST00000505594&1254&16	ENST00000505153&5631&16
120	TCAGGCTGGAGTGCAGTGGC	2	ENST00000511063	1244	hsa-miR-1273g-3p	ENST00000511063	1233	ENST00000505594&1254&16	ENST00000505153&5631&16
120	TCAGGCTGGAGTGCAGTGGC	2	ENST00000448248	904	hsa-miR-1273g-3p	ENST00000448248	893	ENST00000505594&1254&16	ENST00000505153&5631&16
120	TCAGGCTGGAGTGCAGTGGC	2	ENST00000514664	2941	hsa-miR-1273g-3p	ENST00000514664	2930	ENST00000505594&1254&16	ENST00000505153&5631&16
120	TCAGGCTGGAGTGCAGTGGC	2	ENST00000464478	391	hsa-miR-1273g-3p	ENST00000464478	380	ENST00000505594&1254&16	ENST00000505153&5631&16
120	TCAGGCTGGAGTGCAGTGGC	2	ENST00000371727	606	hsa-miR-1273g-3p	ENST00000371727	595	ENST00000505594&1254&16	ENST00000505153&5631&16
120	TCAGGCTGGAGTGCAGTGGC	2	ENST00000459674	1161	hsa-miR-1273g-3p	ENST00000459674	1150	ENST00000505594&1254&16	ENST00000505153&5631&16
120	TCAGGCTGGAGTGCAGTGGC	2	ENST00000403385	1283	hsa-miR-1273g-3p	ENST00000403385	1272	ENST00000505594&1254&16	ENST00000505153&5631&16
121	CTGGGATTACAGGCGTGA	3	ENST00000275053	6737	hsa-miR-1273a	ENST00000275053	6961	ENST00000562696&218&17	ENST00000548900&479&17
121	CTGGGATTACAGGCGTGA	3	ENST00000548157	215	hsa-miR-1972	ENST00000548157	187	ENST00000562696&218&17	ENST00000548900&479&17
121	CTGGGATTACAGGCGTGA	3	ENST00000547850	215	hsa-miR-1972	ENST00000547850	187	ENST00000562696&218&17	ENST00000548900&479&17
121	CTGGGATTACAGGCGTGA	3	ENST00000388768	3399	hsa-miR-1273e	ENST00000388768	3434	ENST00000562696&218&17	ENST00000548900&479&17
121	CTGGGATTACAGGCGTGA	3	ENST00000466187	2008	hsa-miR-1273e	ENST00000466187	2043	ENST00000562696&218&17	ENST00000548900&479&17
121	CTGGGATTACAGGCGTGA	3	ENST00000369301	8119	hsa-miR-1273e	ENST00000369301	7973	ENST00000562696&218&17	ENST00000548900&479&17
121	CTGGGATTACAGGCGTGA	3	ENST00000599628	1486	hsa-miR-1273e	ENST00000599628	1203	ENST00000562696&218&17	ENST00000548900&479&17
121	CTGGGATTACAGGCGTGA	3	ENST00000566036	63	hsa-miR-1273f	ENST00000566036	249	ENST00000562696&218&17	ENST00000548900&479&17
121	CTGGGATTACAGGCGTGA	3	ENST00000505907	3248	hsa-miR-1273f	ENST00000505907	3433	ENST00000562696&218&17	ENST00000548900&479&17
121	CTGGGATTACAGGCGTGA	3	ENST00000525088	1550	hsa-miR-1273g-3p	ENST00000525088	1630	ENST00000562696&218&17	ENST00000548900&479&17
121	CTGGGATTACAGGCGTGA	3	ENST00000523129	1746	hsa-miR-1273g-3p	ENST00000523129	1358	ENST00000562696&218&17	ENST00000548900&479&17
121	CTGGGATTACAGGCGTGA	3	ENST00000523129	1746	hsa-miR-1273g-3p	ENST00000523129	1665	ENST00000562696&218&17	ENST00000548900&479&17
121	CTGGGATTACAGGCGTGA	3	ENST00000416209	1746	hsa-miR-1273g-3p	ENST00000416209	1358	ENST00000562696&218&17	ENST00000548900&479&17
121	CTGGGATTACAGGCGTGA	3	ENST00000416209	1746	hsa-miR-1273g-3p	ENST00000416209	1665	ENST00000562696&218&17	ENST00000548900&479&17
121	CTGGGATTACAGGCGTGA	3	ENST00000600850	868	hsa-miR-1273g-3p	ENST00000600850	1078	ENST00000562696&218&17	ENST00000548900&479&17
121	CTGGGATTACAGGCGTGA	3	ENST00000322753	2459	hsa-miR-5585-3p	ENST00000322753	2232	ENST00000562696&218&17	ENST00000548900&479&17
122	GGAGGCTGAGGCAGGAGAAT	5	ENST00000562760	1006	hsa-miR-5096	ENST00000562760	1083	ENST00000565050&821&13	ENST00000568776&619&13	ENST00000601343&682&15	ENST00000523733&272&13	ENST00000565600&219&13	ENST00000597357&112&23	ENST00000458178&2620&23	ENST00000514784&328&11
122	GGAGGCTGAGGCAGGAGAAT	5	ENST00000421870	281	hsa-miR-5095	ENST00000421870	436	ENST00000565050&821&13	ENST00000568776&619&13	ENST00000601343&682&15	ENST00000523733&272&13	ENST00000565600&219&13	ENST00000597357&112&23	ENST00000458178&2620&23	ENST00000514784&328&11
122	GGAGGCTGAGGCAGGAGAAT	5	ENST00000501818	2423	hsa-miR-5095	ENST00000501818	2580	ENST00000565050&821&13	ENST00000568776&619&13	ENST00000601343&682&15	ENST00000523733&272&13	ENST00000565600&219&13	ENST00000597357&112&23	ENST00000458178&2620&23	ENST00000514784&328&11
122	GGAGGCTGAGGCAGGAGAAT	5	ENST00000563747	1334	hsa-miR-5095	ENST00000563747	1490	ENST00000565050&821&13	ENST00000568776&619&13	ENST00000601343&682&15	ENST00000523733&272&13	ENST00000565600&219&13	ENST00000597357&112&23	ENST00000458178&2620&23	ENST00000514784&328&11
122	GGAGGCTGAGGCAGGAGAAT	5	ENST00000586798	3069	hsa-miR-5095	ENST00000586798	3225	ENST00000565050&821&13	ENST00000568776&619&13	ENST00000601343&682&15	ENST00000523733&272&13	ENST00000565600&219&13	ENST00000597357&112&23	ENST00000458178&2620&23	ENST00000514784&328&11
122	GGAGGCTGAGGCAGGAGAAT	5	ENST00000441363	1955	hsa-miR-5095	ENST00000441363	2111	ENST00000565050&821&13	ENST00000568776&619&13	ENST00000601343&682&15	ENST00000523733&272&13	ENST00000565600&219&13	ENST00000597357&112&23	ENST00000458178&2620&23	ENST00000514784&328&11
122	GGAGGCTGAGGCAGGAGAAT	5	ENST00000332468	1146	hsa-miR-5095	ENST00000332468	1301	ENST00000565050&821&13	ENST00000568776&619&13	ENST00000601343&682&15	ENST00000523733&272&13	ENST00000565600&219&13	ENST00000597357&112&23	ENST00000458178&2620&23	ENST00000514784&328&11
122	GGAGGCTGAGGCAGGAGAAT	5	ENST00000506037	277	hsa-miR-5095	ENST00000506037	433	ENST00000565050&821&13	ENST00000568776&619&13	ENST00000601343&682&15	ENST00000523733&272&13	ENST00000565600&219&13	ENST00000597357&112&23	ENST00000458178&2620&23	ENST00000514784&328&11
122	GGAGGCTGAGGCAGGAGAAT	5	ENST00000436580	2708	hsa-miR-5095	ENST00000436580	2866	ENST00000565050&821&13	ENST00000568776&619&13	ENST00000601343&682&15	ENST00000523733&272&13	ENST00000565600&219&13	ENST00000597357&112&23	ENST00000458178&2620&23	ENST00000514784&328&11
122	GGAGGCTGAGGCAGGAGAAT	5	ENST00000355407	1634	hsa-miR-5095	ENST00000355407	1790	ENST00000565050&821&13	ENST00000568776&619&13	ENST00000601343&682&15	ENST00000523733&272&13	ENST00000565600&219&13	ENST00000597357&112&23	ENST00000458178&2620&23	ENST00000514784&328&11
122	GGAGGCTGAGGCAGGAGAAT	5	ENST00000547118	206	hsa-miR-5095	ENST00000547118	367	ENST00000565050&821&13	ENST00000568776&619&13	ENST00000601343&682&15	ENST00000523733&272&13	ENST00000565600&219&13	ENST00000597357&112&23	ENST00000458178&2620&23	ENST00000514784&328&11
122	GGAGGCTGAGGCAGGAGAAT	5	ENST00000510256	656	hsa-miR-5585-3p	ENST00000510256	664	ENST00000565050&821&13	ENST00000568776&619&13	ENST00000601343&682&15	ENST00000523733&272&13	ENST00000565600&219&13	ENST00000597357&112&23	ENST00000458178&2620&23	ENST00000514784&328&11
122	GGAGGCTGAGGCAGGAGAAT	5	ENST00000489074	656	hsa-miR-5585-3p	ENST00000489074	664	ENST00000565050&821&13	ENST00000568776&619&13	ENST00000601343&682&15	ENST00000523733&272&13	ENST00000565600&219&13	ENST00000597357&112&23	ENST00000458178&2620&23	ENST00000514784&328&11
122	GGAGGCTGAGGCAGGAGAAT	5	ENST00000576928	2428	hsa-miR-5095	ENST00000576928	2585	ENST00000565050&821&13	ENST00000568776&619&13	ENST00000601343&682&15	ENST00000523733&272&13	ENST00000565600&219&13	ENST00000597357&112&23	ENST00000458178&2620&23	ENST00000514784&328&11
122	GGAGGCTGAGGCAGGAGAAT	5	ENST00000574314	2345	hsa-miR-5095	ENST00000574314	2502	ENST00000565050&821&13	ENST00000568776&619&13	ENST00000601343&682&15	ENST00000523733&272&13	ENST00000565600&219&13	ENST00000597357&112&23	ENST00000458178&2620&23	ENST00000514784&328&11
122	GGAGGCTGAGGCAGGAGAAT	5	ENST00000573669	1460	hsa-miR-5095	ENST00000573669	1617	ENST00000565050&821&13	ENST00000568776&619&13	ENST00000601343&682&15	ENST00000523733&272&13	ENST00000565600&219&13	ENST00000597357&112&23	ENST00000458178&2620&23	ENST00000514784&328&11
122	GGAGGCTGAGGCAGGAGAAT	5	ENST00000548445	44	hsa-miR-5095	ENST00000548445	200	ENST00000565050&821&13	ENST00000568776&619&13	ENST00000601343&682&15	ENST00000523733&272&13	ENST00000565600&219&13	ENST00000597357&112&23	ENST00000458178&2620&23	ENST00000514784&328&11
122	GGAGGCTGAGGCAGGAGAAT	5	ENST00000369981	7984	hsa-miR-5095	ENST00000369981	8140	ENST00000565050&821&13	ENST00000568776&619&13	ENST00000601343&682&15	ENST00000523733&272&13	ENST00000565600&219&13	ENST00000597357&112&23	ENST00000458178&2620&23	ENST00000514784&328&11
122	GGAGGCTGAGGCAGGAGAAT	5	ENST00000574773	2509	hsa-miR-5095	ENST00000574773	2666	ENST00000565050&821&13	ENST00000568776&619&13	ENST00000601343&682&15	ENST00000523733&272&13	ENST00000565600&219&13	ENST00000597357&112&23	ENST00000458178&2620&23	ENST00000514784&328&11
122	GGAGGCTGAGGCAGGAGAAT	5	ENST00000575379	820	hsa-miR-5095	ENST00000575379	976	ENST00000565050&821&13	ENST00000568776&619&13	ENST00000601343&682&15	ENST00000523733&272&13	ENST00000565600&219&13	ENST00000597357&112&23	ENST00000458178&2620&23	ENST00000514784&328&11
122	GGAGGCTGAGGCAGGAGAAT	5	ENST00000576360	1576	hsa-miR-5095	ENST00000576360	1732	ENST00000565050&821&13	ENST00000568776&619&13	ENST00000601343&682&15	ENST00000523733&272&13	ENST00000565600&219&13	ENST00000597357&112&23	ENST00000458178&2620&23	ENST00000514784&328&11
122	GGAGGCTGAGGCAGGAGAAT	5	ENST00000306071	1904	hsa-miR-5095	ENST00000306071	2060	ENST00000565050&821&13	ENST00000568776&619&13	ENST00000601343&682&15	ENST00000523733&272&13	ENST00000565600&219&13	ENST00000597357&112&23	ENST00000458178&2620&23	ENST00000514784&328&11
122	GGAGGCTGAGGCAGGAGAAT	5	ENST00000470730	1990	hsa-miR-5095	ENST00000470730	2146	ENST00000565050&821&13	ENST00000568776&619&13	ENST00000601343&682&15	ENST00000523733&272&13	ENST00000565600&219&13	ENST00000597357&112&23	ENST00000458178&2620&23	ENST00000514784&328&11
122	GGAGGCTGAGGCAGGAGAAT	5	ENST00000568911	4762	hsa-miR-5096	ENST00000568911	4839	ENST00000565050&821&13	ENST00000568776&619&13	ENST00000601343&682&15	ENST00000523733&272&13	ENST00000565600&219&13	ENST00000597357&112&23	ENST00000458178&2620&23	ENST00000514784&328&11
122	GGAGGCTGAGGCAGGAGAAT	5	ENST00000558411	1935	hsa-miR-5096	ENST00000558411	2015	ENST00000565050&821&13	ENST00000568776&619&13	ENST00000601343&682&15	ENST00000523733&272&13	ENST00000565600&219&13	ENST00000597357&112&23	ENST00000458178&2620&23	ENST00000514784&328&11
122	GGAGGCTGAGGCAGGAGAAT	5	ENST00000473592	1606	hsa-miR-5096	ENST00000473592	1684	ENST00000565050&821&13	ENST00000568776&619&13	ENST00000601343&682&15	ENST00000523733&272&13	ENST00000565600&219&13	ENST00000597357&112&23	ENST00000458178&2620&23	ENST00000514784&328&11
122	GGAGGCTGAGGCAGGAGAAT	5	ENST00000343526	6933	hsa-miR-5096	ENST00000343526	7010	ENST00000565050&821&13	ENST00000568776&619&13	ENST00000601343&682&15	ENST00000523733&272&13	ENST00000565600&219&13	ENST00000597357&112&23	ENST00000458178&2620&23	ENST00000514784&328&11
122	GGAGGCTGAGGCAGGAGAAT	5	ENST00000510711	1229	hsa-miR-5096	ENST00000510711	1316	ENST00000565050&821&13	ENST00000568776&619&13	ENST00000601343&682&15	ENST00000523733&272&13	ENST00000565600&219&13	ENST00000597357&112&23	ENST00000458178&2620&23	ENST00000514784&328&11
122	GGAGGCTGAGGCAGGAGAAT	5	ENST00000409982	830	hsa-miR-5096	ENST00000409982	907	ENST00000565050&821&13	ENST00000568776&619&13	ENST00000601343&682&15	ENST00000523733&272&13	ENST00000565600&219&13	ENST00000597357&112&23	ENST00000458178&2620&23	ENST00000514784&328&11
122	GGAGGCTGAGGCAGGAGAAT	5	ENST00000378845	1389	hsa-miR-5096	ENST00000378845	1465	ENST00000565050&821&13	ENST00000568776&619&13	ENST00000601343&682&15	ENST00000523733&272&13	ENST00000565600&219&13	ENST00000597357&112&23	ENST00000458178&2620&23	ENST00000514784&328&11
122	GGAGGCTGAGGCAGGAGAAT	5	ENST00000370799	1539	hsa-miR-5096	ENST00000370799	1615	ENST00000565050&821&13	ENST00000568776&619&13	ENST00000601343&682&15	ENST00000523733&272&13	ENST00000565600&219&13	ENST00000597357&112&23	ENST00000458178&2620&23	ENST00000514784&328&11
122	GGAGGCTGAGGCAGGAGAAT	5	ENST00000484535	1141	hsa-miR-5096	ENST00000484535	1220	ENST00000565050&821&13	ENST00000568776&619&13	ENST00000601343&682&15	ENST00000523733&272&13	ENST00000565600&219&13	ENST00000597357&112&23	ENST00000458178&2620&23	ENST00000514784&328&11
122	GGAGGCTGAGGCAGGAGAAT	5	ENST00000590227	422	hsa-miR-5096	ENST00000590227	486	ENST00000565050&821&13	ENST00000568776&619&13	ENST00000601343&682&15	ENST00000523733&272&13	ENST00000565600&219&13	ENST00000597357&112&23	ENST00000458178&2620&23	ENST00000514784&328&11
122	GGAGGCTGAGGCAGGAGAAT	5	ENST00000554660	866	hsa-miR-5096	ENST00000554660	943	ENST00000565050&821&13	ENST00000568776&619&13	ENST00000601343&682&15	ENST00000523733&272&13	ENST00000565600&219&13	ENST00000597357&112&23	ENST00000458178&2620&23	ENST00000514784&328&11
122	GGAGGCTGAGGCAGGAGAAT	5	ENST00000311089	2111	hsa-miR-5096	ENST00000311089	2188	ENST00000565050&821&13	ENST00000568776&619&13	ENST00000601343&682&15	ENST00000523733&272&13	ENST00000565600&219&13	ENST00000597357&112&23	ENST00000458178&2620&23	ENST00000514784&328&11
122	GGAGGCTGAGGCAGGAGAAT	5	ENST00000563793	203	hsa-miR-5096	ENST00000563793	283	ENST00000565050&821&13	ENST00000568776&619&13	ENST00000601343&682&15	ENST00000523733&272&13	ENST00000565600&219&13	ENST00000597357&112&23	ENST00000458178&2620&23	ENST00000514784&328&11
122	GGAGGCTGAGGCAGGAGAAT	5	ENST00000600410	2247	hsa-miR-5096	ENST00000600410	2323	ENST00000565050&821&13	ENST00000568776&619&13	ENST00000601343&682&15	ENST00000523733&272&13	ENST00000565600&219&13	ENST00000597357&112&23	ENST00000458178&2620&23	ENST00000514784&328&11
122	GGAGGCTGAGGCAGGAGAAT	5	ENST00000563945	298	hsa-miR-5096	ENST00000563945	374	ENST00000565050&821&13	ENST00000568776&619&13	ENST00000601343&682&15	ENST00000523733&272&13	ENST00000565600&219&13	ENST00000597357&112&23	ENST00000458178&2620&23	ENST00000514784&328&11
122	GGAGGCTGAGGCAGGAGAAT	5	ENST00000318348	1249	hsa-miR-5096	ENST00000318348	1327	ENST00000565050&821&13	ENST00000568776&619&13	ENST00000601343&682&15	ENST00000523733&272&13	ENST00000565600&219&13	ENST00000597357&112&23	ENST00000458178&2620&23	ENST00000514784&328&11
122	GGAGGCTGAGGCAGGAGAAT	5	ENST00000576086	799	hsa-miR-5585-3p	ENST00000576086	807	ENST00000565050&821&13	ENST00000568776&619&13	ENST00000601343&682&15	ENST00000523733&272&13	ENST00000565600&219&13	ENST00000597357&112&23	ENST00000458178&2620&23	ENST00000514784&328&11
122	GGAGGCTGAGGCAGGAGAAT	5	ENST00000423644	4475	hsa-miR-5585-3p	ENST00000423644	4483	ENST00000565050&821&13	ENST00000568776&619&13	ENST00000601343&682&15	ENST00000523733&272&13	ENST00000565600&219&13	ENST00000597357&112&23	ENST00000458178&2620&23	ENST00000514784&328&11
122	GGAGGCTGAGGCAGGAGAAT	5	ENST00000359484	4348	hsa-miR-5585-3p	ENST00000359484	4356	ENST00000565050&821&13	ENST00000568776&619&13	ENST00000601343&682&15	ENST00000523733&272&13	ENST00000565600&219&13	ENST00000597357&112&23	ENST00000458178&2620&23	ENST00000514784&328&11
122	GGAGGCTGAGGCAGGAGAAT	5	ENST00000346834	4411	hsa-miR-5585-3p	ENST00000346834	4419	ENST00000565050&821&13	ENST00000568776&619&13	ENST00000601343&682&15	ENST00000523733&272&13	ENST00000565600&219&13	ENST00000597357&112&23	ENST00000458178&2620&23	ENST00000514784&328&11
122	GGAGGCTGAGGCAGGAGAAT	5	ENST00000480696	437	hsa-miR-5585-3p	ENST00000480696	445	ENST00000565050&821&13	ENST00000568776&619&13	ENST00000601343&682&15	ENST00000523733&272&13	ENST00000565600&219&13	ENST00000597357&112&23	ENST00000458178&2620&23	ENST00000514784&328&11
122	GGAGGCTGAGGCAGGAGAAT	5	ENST00000394019	4654	hsa-miR-5585-3p	ENST00000394019	4662	ENST00000565050&821&13	ENST00000568776&619&13	ENST00000601343&682&15	ENST00000523733&272&13	ENST00000565600&219&13	ENST00000597357&112&23	ENST00000458178&2620&23	ENST00000514784&328&11
122	GGAGGCTGAGGCAGGAGAAT	5	ENST00000483195	4882	hsa-miR-5585-3p	ENST00000483195	4890	ENST00000565050&821&13	ENST00000568776&619&13	ENST00000601343&682&15	ENST00000523733&272&13	ENST00000565600&219&13	ENST00000597357&112&23	ENST00000458178&2620&23	ENST00000514784&328&11
122	GGAGGCTGAGGCAGGAGAAT	5	ENST00000528973	3137	hsa-miR-5585-3p	ENST00000528973	2940	ENST00000565050&821&13	ENST00000568776&619&13	ENST00000601343&682&15	ENST00000523733&272&13	ENST00000565600&219&13	ENST00000597357&112&23	ENST00000458178&2620&23	ENST00000514784&328&11
122	GGAGGCTGAGGCAGGAGAAT	5	ENST00000597411	656	hsa-miR-5585-3p	ENST00000597411	664	ENST00000565050&821&13	ENST00000568776&619&13	ENST00000601343&682&15	ENST00000523733&272&13	ENST00000565600&219&13	ENST00000597357&112&23	ENST00000458178&2620&23	ENST00000514784&328&11
122	GGAGGCTGAGGCAGGAGAAT	5	ENST00000430014	1948	hsa-miR-5585-3p	ENST00000430014	1956	ENST00000565050&821&13	ENST00000568776&619&13	ENST00000601343&682&15	ENST00000523733&272&13	ENST00000565600&219&13	ENST00000597357&112&23	ENST00000458178&2620&23	ENST00000514784&328&11
122	GGAGGCTGAGGCAGGAGAAT	5	ENST00000580480	1429	hsa-miR-5585-3p	ENST00000580480	1437	ENST00000565050&821&13	ENST00000568776&619&13	ENST00000601343&682&15	ENST00000523733&272&13	ENST00000565600&219&13	ENST00000597357&112&23	ENST00000458178&2620&23	ENST00000514784&328&11
122	GGAGGCTGAGGCAGGAGAAT	5	ENST00000455004	1391	hsa-miR-5585-3p	ENST00000455004	1399	ENST00000565050&821&13	ENST00000568776&619&13	ENST00000601343&682&15	ENST00000523733&272&13	ENST00000565600&219&13	ENST00000597357&112&23	ENST00000458178&2620&23	ENST00000514784&328&11
122	GGAGGCTGAGGCAGGAGAAT	5	ENST00000440084	1970	hsa-miR-5585-3p	ENST00000440084	1978	ENST00000565050&821&13	ENST00000568776&619&13	ENST00000601343&682&15	ENST00000523733&272&13	ENST00000565600&219&13	ENST00000597357&112&23	ENST00000458178&2620&23	ENST00000514784&328&11
122	GGAGGCTGAGGCAGGAGAAT	5	ENST00000430442	1429	hsa-miR-5585-3p	ENST00000430442	1437	ENST00000565050&821&13	ENST00000568776&619&13	ENST00000601343&682&15	ENST00000523733&272&13	ENST00000565600&219&13	ENST00000597357&112&23	ENST00000458178&2620&23	ENST00000514784&328&11
122	GGAGGCTGAGGCAGGAGAAT	5	ENST00000465069	250	hsa-miR-5585-3p	ENST00000465069	258	ENST00000565050&821&13	ENST00000568776&619&13	ENST00000601343&682&15	ENST00000523733&272&13	ENST00000565600&219&13	ENST00000597357&112&23	ENST00000458178&2620&23	ENST00000514784&328&11
122	GGAGGCTGAGGCAGGAGAAT	5	ENST00000340681	393	hsa-miR-5585-3p	ENST00000340681	401	ENST00000565050&821&13	ENST00000568776&619&13	ENST00000601343&682&15	ENST00000523733&272&13	ENST00000565600&219&13	ENST00000597357&112&23	ENST00000458178&2620&23	ENST00000514784&328&11
122	GGAGGCTGAGGCAGGAGAAT	5	ENST00000504855	210	hsa-miR-5585-3p	ENST00000504855	218	ENST00000565050&821&13	ENST00000568776&619&13	ENST00000601343&682&15	ENST00000523733&272&13	ENST00000565600&219&13	ENST00000597357&112&23	ENST00000458178&2620&23	ENST00000514784&328&11
122	GGAGGCTGAGGCAGGAGAAT	5	ENST00000380172	2536	hsa-miR-5585-3p	ENST00000380172	2544	ENST00000565050&821&13	ENST00000568776&619&13	ENST00000601343&682&15	ENST00000523733&272&13	ENST00000565600&219&13	ENST00000597357&112&23	ENST00000458178&2620&23	ENST00000514784&328&11
122	GGAGGCTGAGGCAGGAGAAT	5	ENST00000396307	2878	hsa-miR-5585-3p	ENST00000396307	2886	ENST00000565050&821&13	ENST00000568776&619&13	ENST00000601343&682&15	ENST00000523733&272&13	ENST00000565600&219&13	ENST00000597357&112&23	ENST00000458178&2620&23	ENST00000514784&328&11
122	GGAGGCTGAGGCAGGAGAAT	5	ENST00000527614	3118	hsa-miR-5585-3p	ENST00000527614	3126	ENST00000565050&821&13	ENST00000568776&619&13	ENST00000601343&682&15	ENST00000523733&272&13	ENST00000565600&219&13	ENST00000597357&112&23	ENST00000458178&2620&23	ENST00000514784&328&11
122	GGAGGCTGAGGCAGGAGAAT	5	ENST00000337963	2781	hsa-miR-5585-3p	ENST00000337963	2789	ENST00000565050&821&13	ENST00000568776&619&13	ENST00000601343&682&15	ENST00000523733&272&13	ENST00000565600&219&13	ENST00000597357&112&23	ENST00000458178&2620&23	ENST00000514784&328&11
122	GGAGGCTGAGGCAGGAGAAT	5	ENST00000502168	2486	hsa-miR-5585-3p	ENST00000502168	2494	ENST00000565050&821&13	ENST00000568776&619&13	ENST00000601343&682&15	ENST00000523733&272&13	ENST00000565600&219&13	ENST00000597357&112&23	ENST00000458178&2620&23	ENST00000514784&328&11
122	GGAGGCTGAGGCAGGAGAAT	5	ENST00000535942	2711	hsa-miR-5585-3p	ENST00000535942	2719	ENST00000565050&821&13	ENST00000568776&619&13	ENST00000601343&682&15	ENST00000523733&272&13	ENST00000565600&219&13	ENST00000597357&112&23	ENST00000458178&2620&23	ENST00000514784&328&11
122	GGAGGCTGAGGCAGGAGAAT	5	ENST00000382909	2372	hsa-miR-5585-3p	ENST00000382909	2380	ENST00000565050&821&13	ENST00000568776&619&13	ENST00000601343&682&15	ENST00000523733&272&13	ENST00000565600&219&13	ENST00000597357&112&23	ENST00000458178&2620&23	ENST00000514784&328&11
122	GGAGGCTGAGGCAGGAGAAT	5	ENST00000454337	4869	hsa-miR-5585-3p	ENST00000454337	4877	ENST00000565050&821&13	ENST00000568776&619&13	ENST00000601343&682&15	ENST00000523733&272&13	ENST00000565600&219&13	ENST00000597357&112&23	ENST00000458178&2620&23	ENST00000514784&328&11
122	GGAGGCTGAGGCAGGAGAAT	5	ENST00000590933	463	hsa-miR-5585-3p	ENST00000590933	471	ENST00000565050&821&13	ENST00000568776&619&13	ENST00000601343&682&15	ENST00000523733&272&13	ENST00000565600&219&13	ENST00000597357&112&23	ENST00000458178&2620&23	ENST00000514784&328&11
122	GGAGGCTGAGGCAGGAGAAT	5	ENST00000358661	2505	hsa-miR-5585-3p	ENST00000358661	2513	ENST00000565050&821&13	ENST00000568776&619&13	ENST00000601343&682&15	ENST00000523733&272&13	ENST00000565600&219&13	ENST00000597357&112&23	ENST00000458178&2620&23	ENST00000514784&328&11
122	GGAGGCTGAGGCAGGAGAAT	5	ENST00000354278	3231	hsa-miR-5585-3p	ENST00000354278	3239	ENST00000565050&821&13	ENST00000568776&619&13	ENST00000601343&682&15	ENST00000523733&272&13	ENST00000565600&219&13	ENST00000597357&112&23	ENST00000458178&2620&23	ENST00000514784&328&11
122	GGAGGCTGAGGCAGGAGAAT	5	ENST00000351894	3402	hsa-miR-5585-3p	ENST00000351894	3410	ENST00000565050&821&13	ENST00000568776&619&13	ENST00000601343&682&15	ENST00000523733&272&13	ENST00000565600&219&13	ENST00000597357&112&23	ENST00000458178&2620&23	ENST00000514784&328&11
122	GGAGGCTGAGGCAGGAGAAT	5	ENST00000535162	3567	hsa-miR-5585-3p	ENST00000535162	3575	ENST00000565050&821&13	ENST00000568776&619&13	ENST00000601343&682&15	ENST00000523733&272&13	ENST00000565600&219&13	ENST00000597357&112&23	ENST00000458178&2620&23	ENST00000514784&328&11
122	GGAGGCTGAGGCAGGAGAAT	5	ENST00000324134	3687	hsa-miR-5585-3p	ENST00000324134	3695	ENST00000565050&821&13	ENST00000568776&619&13	ENST00000601343&682&15	ENST00000523733&272&13	ENST00000565600&219&13	ENST00000597357&112&23	ENST00000458178&2620&23	ENST00000514784&328&11
122	GGAGGCTGAGGCAGGAGAAT	5	ENST00000586372	2923	hsa-miR-5585-3p	ENST00000586372	2931	ENST00000565050&821&13	ENST00000568776&619&13	ENST00000601343&682&15	ENST00000523733&272&13	ENST00000565600&219&13	ENST00000597357&112&23	ENST00000458178&2620&23	ENST00000514784&328&11
122	GGAGGCTGAGGCAGGAGAAT	5	ENST00000586372	3494	hsa-miR-5585-3p	ENST00000586372	3502	ENST00000565050&821&13	ENST00000568776&619&13	ENST00000601343&682&15	ENST00000523733&272&13	ENST00000565600&219&13	ENST00000597357&112&23	ENST00000458178&2620&23	ENST00000514784&328&11
123	GCTGAGGTGGGAGGATCACT	2	ENST00000483681	1615	hsa-miR-1285-5p	ENST00000483681	1529	ENST00000327590&1925&16	ENST00000260008&4495&16	ENST00000511601&4608&16
124	TTCCCCTGCCTCAGCCTCCCA	2	ENST00000470464	2427	hsa-miR-1273a	ENST00000470464	2333	ENST00000588697&433&10	ENST00000590478&1742&10
124	TTCCCCTGCCTCAGCCTCCCA	2	ENST00000485585	2427	hsa-miR-1273a	ENST00000485585	2333	ENST00000588697&433&10	ENST00000590478&1742&10
124	TTCCCCTGCCTCAGCCTCCCA	2	ENST00000495194	2426	hsa-miR-1273a	ENST00000495194	2333	ENST00000588697&433&10	ENST00000590478&1742&10
124	TTCCCCTGCCTCAGCCTCCCA	2	ENST00000486105	2425	hsa-miR-1273a	ENST00000486105	2332	ENST00000588697&433&10	ENST00000590478&1742&10
124	TTCCCCTGCCTCAGCCTCCCA	2	ENST00000475993	2425	hsa-miR-1273a	ENST00000475993	2332	ENST00000588697&433&10	ENST00000590478&1742&10
124	TTCCCCTGCCTCAGCCTCCCA	2	ENST00000494413	2425	hsa-miR-1273a	ENST00000494413	2332	ENST00000588697&433&10	ENST00000590478&1742&10
124	TTCCCCTGCCTCAGCCTCCCA	2	ENST00000475528	2427	hsa-miR-1273a	ENST00000475528	2333	ENST00000588697&433&10	ENST00000590478&1742&10
125	ACCATGTTGGCCAGGCTT	2	ENST00000558027	350	hsa-miR-1273f	ENST00000558027	452	ENST00000596802&2359&25	ENST00000458412&1368&12	ENST00000532417&2161&27	ENST00000595130&2263&25	ENST00000588380&434&27	ENST00000455607&688&27	ENST00000566841&632&27	ENST00000570148&767&27	ENST00000584831&825&12	ENST00000587586&335&25	ENST00000593864&1474&27	ENST00000572811&1474&27	ENST00000366134&640&27	ENST00000574716&1524&27	ENST00000584157&761&25	ENST00000437016&578&12	ENST00000581621&4279&12	ENST00000507938&1439&25	ENST00000590284&312&25	ENST00000393978&146&14	ENST00000416851&7389&12	ENST00000465069&190&12	ENST00000558038&715&18	ENST00000569988&1531&15	ENST00000446628&2843&25	ENST00000523153&2772&12	ENST00000223076&546&25	ENST00000552312&82&18	ENST00000357014&79&12	ENST00000485225&1819&12	ENST00000411857&7110&25	ENST00000417194&4808&27	ENST00000433168&2109&27	ENST00000255890&2182&27	ENST00000571707&1354&25
126	GAGGATCGCTTGAGCCCAGGAG	2	ENST00000491239	2015	hsa-miR-5585-3p	ENST00000491239	1904	ENST00000444210&918&11	ENST00000219235&2433&11	ENST00000371980&1286&11	ENST00000555998&100&16	ENST00000577595&164&11
127	AAAAATTAGCTGGGCGTG	2	ENST00000510256	656	hsa-miR-5585-3p	ENST00000510256	616	ENST00000417123&230&32	ENST00000444359&304&36	ENST00000559553&370&36	ENST00000565178&538&36	ENST00000473434&2326&32	ENST00000438934&599&36	ENST00000501239&333&32	ENST00000583062&514&32	ENST00000383808&342&36	ENST00000440698&1107&36	ENST00000599992&1487&32	ENST00000597825&1915&32	ENST00000594223&1842&32	ENST00000594429&1401&32	ENST00000595999&1583&32	ENST00000599617&1755&32	ENST00000596004&1282&32	ENST00000599205&1552&32	ENST00000578657&2572&36	ENST00000429591&1626&36	ENST00000460024&1302&36	ENST00000491949&1295&36	ENST00000417610&1045&36	ENST00000431888&1026&36	ENST00000422012&1086&36	ENST00000457884&1158&36	ENST00000426729&1188&36	ENST00000467835&1502&36	ENST00000550255&888&32	ENST00000493554&1302&36	ENST00000487474&1295&36	ENST00000383410&1026&36	ENST00000400067&1045&36	ENST00000383411&1086&36	ENST00000400071&1158&36	ENST00000383412&1188&36	ENST00000488047&1502&36	ENST00000569108&148&13	ENST00000550586&888&32
127	AAAAATTAGCTGGGCGTG	2	ENST00000489074	656	hsa-miR-5585-3p	ENST00000489074	616	ENST00000417123&230&32	ENST00000444359&304&36	ENST00000559553&370&36	ENST00000565178&538&36	ENST00000473434&2326&32	ENST00000438934&599&36	ENST00000501239&333&32	ENST00000583062&514&32	ENST00000383808&342&36	ENST00000440698&1107&36	ENST00000599992&1487&32	ENST00000597825&1915&32	ENST00000594223&1842&32	ENST00000594429&1401&32	ENST00000595999&1583&32	ENST00000599617&1755&32	ENST00000596004&1282&32	ENST00000599205&1552&32	ENST00000578657&2572&36	ENST00000429591&1626&36	ENST00000460024&1302&36	ENST00000491949&1295&36	ENST00000417610&1045&36	ENST00000431888&1026&36	ENST00000422012&1086&36	ENST00000457884&1158&36	ENST00000426729&1188&36	ENST00000467835&1502&36	ENST00000550255&888&32	ENST00000493554&1302&36	ENST00000487474&1295&36	ENST00000383410&1026&36	ENST00000400067&1045&36	ENST00000383411&1086&36	ENST00000400071&1158&36	ENST00000383412&1188&36	ENST00000488047&1502&36	ENST00000569108&148&13	ENST00000550586&888&32
127	AAAAATTAGCTGGGCGTG	2	ENST00000576928	2428	hsa-miR-5095	ENST00000576928	2537	ENST00000417123&230&32	ENST00000444359&304&36	ENST00000559553&370&36	ENST00000565178&538&36	ENST00000473434&2326&32	ENST00000438934&599&36	ENST00000501239&333&32	ENST00000583062&514&32	ENST00000383808&342&36	ENST00000440698&1107&36	ENST00000599992&1487&32	ENST00000597825&1915&32	ENST00000594223&1842&32	ENST00000594429&1401&32	ENST00000595999&1583&32	ENST00000599617&1755&32	ENST00000596004&1282&32	ENST00000599205&1552&32	ENST00000578657&2572&36	ENST00000429591&1626&36	ENST00000460024&1302&36	ENST00000491949&1295&36	ENST00000417610&1045&36	ENST00000431888&1026&36	ENST00000422012&1086&36	ENST00000457884&1158&36	ENST00000426729&1188&36	ENST00000467835&1502&36	ENST00000550255&888&32	ENST00000493554&1302&36	ENST00000487474&1295&36	ENST00000383410&1026&36	ENST00000400067&1045&36	ENST00000383411&1086&36	ENST00000400071&1158&36	ENST00000383412&1188&36	ENST00000488047&1502&36	ENST00000569108&148&13	ENST00000550586&888&32
127	AAAAATTAGCTGGGCGTG	2	ENST00000574314	2345	hsa-miR-5095	ENST00000574314	2454	ENST00000417123&230&32	ENST00000444359&304&36	ENST00000559553&370&36	ENST00000565178&538&36	ENST00000473434&2326&32	ENST00000438934&599&36	ENST00000501239&333&32	ENST00000583062&514&32	ENST00000383808&342&36	ENST00000440698&1107&36	ENST00000599992&1487&32	ENST00000597825&1915&32	ENST00000594223&1842&32	ENST00000594429&1401&32	ENST00000595999&1583&32	ENST00000599617&1755&32	ENST00000596004&1282&32	ENST00000599205&1552&32	ENST00000578657&2572&36	ENST00000429591&1626&36	ENST00000460024&1302&36	ENST00000491949&1295&36	ENST00000417610&1045&36	ENST00000431888&1026&36	ENST00000422012&1086&36	ENST00000457884&1158&36	ENST00000426729&1188&36	ENST00000467835&1502&36	ENST00000550255&888&32	ENST00000493554&1302&36	ENST00000487474&1295&36	ENST00000383410&1026&36	ENST00000400067&1045&36	ENST00000383411&1086&36	ENST00000400071&1158&36	ENST00000383412&1188&36	ENST00000488047&1502&36	ENST00000569108&148&13	ENST00000550586&888&32
127	AAAAATTAGCTGGGCGTG	2	ENST00000573669	1460	hsa-miR-5095	ENST00000573669	1569	ENST00000417123&230&32	ENST00000444359&304&36	ENST00000559553&370&36	ENST00000565178&538&36	ENST00000473434&2326&32	ENST00000438934&599&36	ENST00000501239&333&32	ENST00000583062&514&32	ENST00000383808&342&36	ENST00000440698&1107&36	ENST00000599992&1487&32	ENST00000597825&1915&32	ENST00000594223&1842&32	ENST00000594429&1401&32	ENST00000595999&1583&32	ENST00000599617&1755&32	ENST00000596004&1282&32	ENST00000599205&1552&32	ENST00000578657&2572&36	ENST00000429591&1626&36	ENST00000460024&1302&36	ENST00000491949&1295&36	ENST00000417610&1045&36	ENST00000431888&1026&36	ENST00000422012&1086&36	ENST00000457884&1158&36	ENST00000426729&1188&36	ENST00000467835&1502&36	ENST00000550255&888&32	ENST00000493554&1302&36	ENST00000487474&1295&36	ENST00000383410&1026&36	ENST00000400067&1045&36	ENST00000383411&1086&36	ENST00000400071&1158&36	ENST00000383412&1188&36	ENST00000488047&1502&36	ENST00000569108&148&13	ENST00000550586&888&32
127	AAAAATTAGCTGGGCGTG	2	ENST00000471863	2080	hsa-miR-5096	ENST00000471863	2109	ENST00000417123&230&32	ENST00000444359&304&36	ENST00000559553&370&36	ENST00000565178&538&36	ENST00000473434&2326&32	ENST00000438934&599&36	ENST00000501239&333&32	ENST00000583062&514&32	ENST00000383808&342&36	ENST00000440698&1107&36	ENST00000599992&1487&32	ENST00000597825&1915&32	ENST00000594223&1842&32	ENST00000594429&1401&32	ENST00000595999&1583&32	ENST00000599617&1755&32	ENST00000596004&1282&32	ENST00000599205&1552&32	ENST00000578657&2572&36	ENST00000429591&1626&36	ENST00000460024&1302&36	ENST00000491949&1295&36	ENST00000417610&1045&36	ENST00000431888&1026&36	ENST00000422012&1086&36	ENST00000457884&1158&36	ENST00000426729&1188&36	ENST00000467835&1502&36	ENST00000550255&888&32	ENST00000493554&1302&36	ENST00000487474&1295&36	ENST00000383410&1026&36	ENST00000400067&1045&36	ENST00000383411&1086&36	ENST00000400071&1158&36	ENST00000383412&1188&36	ENST00000488047&1502&36	ENST00000569108&148&13	ENST00000550586&888&32
127	AAAAATTAGCTGGGCGTG	2	ENST00000576086	799	hsa-miR-5585-3p	ENST00000576086	759	ENST00000417123&230&32	ENST00000444359&304&36	ENST00000559553&370&36	ENST00000565178&538&36	ENST00000473434&2326&32	ENST00000438934&599&36	ENST00000501239&333&32	ENST00000583062&514&32	ENST00000383808&342&36	ENST00000440698&1107&36	ENST00000599992&1487&32	ENST00000597825&1915&32	ENST00000594223&1842&32	ENST00000594429&1401&32	ENST00000595999&1583&32	ENST00000599617&1755&32	ENST00000596004&1282&32	ENST00000599205&1552&32	ENST00000578657&2572&36	ENST00000429591&1626&36	ENST00000460024&1302&36	ENST00000491949&1295&36	ENST00000417610&1045&36	ENST00000431888&1026&36	ENST00000422012&1086&36	ENST00000457884&1158&36	ENST00000426729&1188&36	ENST00000467835&1502&36	ENST00000550255&888&32	ENST00000493554&1302&36	ENST00000487474&1295&36	ENST00000383410&1026&36	ENST00000400067&1045&36	ENST00000383411&1086&36	ENST00000400071&1158&36	ENST00000383412&1188&36	ENST00000488047&1502&36	ENST00000569108&148&13	ENST00000550586&888&32
127	AAAAATTAGCTGGGCGTG	2	ENST00000380172	2536	hsa-miR-5585-3p	ENST00000380172	2496	ENST00000417123&230&32	ENST00000444359&304&36	ENST00000559553&370&36	ENST00000565178&538&36	ENST00000473434&2326&32	ENST00000438934&599&36	ENST00000501239&333&32	ENST00000583062&514&32	ENST00000383808&342&36	ENST00000440698&1107&36	ENST00000599992&1487&32	ENST00000597825&1915&32	ENST00000594223&1842&32	ENST00000594429&1401&32	ENST00000595999&1583&32	ENST00000599617&1755&32	ENST00000596004&1282&32	ENST00000599205&1552&32	ENST00000578657&2572&36	ENST00000429591&1626&36	ENST00000460024&1302&36	ENST00000491949&1295&36	ENST00000417610&1045&36	ENST00000431888&1026&36	ENST00000422012&1086&36	ENST00000457884&1158&36	ENST00000426729&1188&36	ENST00000467835&1502&36	ENST00000550255&888&32	ENST00000493554&1302&36	ENST00000487474&1295&36	ENST00000383410&1026&36	ENST00000400067&1045&36	ENST00000383411&1086&36	ENST00000400071&1158&36	ENST00000383412&1188&36	ENST00000488047&1502&36	ENST00000569108&148&13	ENST00000550586&888&32
128	AATGTTGGCCAGGCTGGT	2	ENST00000321764	2749	hsa-miR-1273f	ENST00000321764	2864	ENST00000487481&954&13	ENST00000589118&414&11	ENST00000596390&1076&13	ENST00000314442&3782&13	ENST00000585757&302&11	ENST00000588380&433&13	ENST00000354425&212&18	ENST00000455607&687&13	ENST00000570148&766&13	ENST00000584831&824&18	ENST00000587586&334&11	ENST00000420877&2442&18	ENST00000565152&628&18	ENST00000458361&3663&13	ENST00000592359&808&11	ENST00000586278&1651&11	ENST00000524309&326&11	ENST00000416930&231&18	ENST00000412203&412&18	ENST00000574716&1523&13	ENST00000584157&760&11	ENST00000555916&1796&18	ENST00000424252&1260&18	ENST00000424663&609&13	ENST00000437833&1034&18	ENST00000581621&4278&18	ENST00000455945&3663&13	ENST00000453209&3659&13	ENST00000415153&3663&13	ENST00000452643&938&11	ENST00000414662&3660&13	ENST00000437716&3659&13	ENST00000600348&1138&11	ENST00000507938&1438&11	ENST00000590284&311&11
129	GATCACAAGGTCAGGAGAT	2	ENST00000510733	3601	hsa-miR-1285-5p	ENST00000510733	3396	ENST00000559553&439&10	ENST00000597346&68043&10	ENST00000597495&319&10	ENST00000447832&1893&10	ENST00000424587&1069&11	ENST00000448958&797&11	ENST00000383808&411&11	ENST00000505089&286&10	ENST00000511495&276&11	ENST00000313956&1980&10	ENST00000425566&1129&11	ENST00000438163&980&11	ENST00000366304&381&11	ENST00000503038&91&11	ENST00000571179&112&11	ENST00000576127&218&11	ENST00000570362&593&11	ENST00000571300&255&11	ENST00000570422&486&11	ENST00000595440&112&11	ENST00000601339&218&11	ENST00000599984&593&11	ENST00000598650&255&11	ENST00000600487&486&11	ENST00000598365&112&11	ENST00000597127&218&11	ENST00000598910&593&11	ENST00000597331&255&11	ENST00000596503&486&11	ENST00000595503&112&11	ENST00000601920&218&11	ENST00000600181&593&11	ENST00000600674&255&11	ENST00000594679&486&11	ENST00000595696&112&11	ENST00000601367&218&11	ENST00000595190&593&11	ENST00000597531&255&11	ENST00000601883&486&11	ENST00000595714&112&11	ENST00000593762&218&11	ENST00000597947&593&11
[truncated: 369 more rows]
[truncated: 59 more columns]

## Sheet: supplementary file 2
trigger miRNAs in human brain(mirBase20)
hsa-miR-5585-3p
hsa-miR-1273g-3p
[truncated: 36 more rows]

## Sheet: supplementary file 3
RESULTS IN MICE
[truncated: 2,136 more rows]

[truncated: 2 more sheets: supplementary file 4, supplementary file 5]
